# Supplementary material for: Development of an anoikis-related gene signature and prognostic model for predicting the tumor microenvironment and response to immunotherapy in colorectal cancer
Source: Front Immunol. 2024 May 8;15:1378305. doi: 10.3389/fimmu.2024.1378305 (PMC11109372; doi:10.3389/fimmu.2024.1378305)
Supplement: Supplementary file 4 [file Table_3.xls]

## Sheet:  Table-S4
Table S3: The list of 3038 DEGs.
BNC2
MPDZ
TSHZ3
CLMP
DDR2
C20orf194
COLEC12
GLI3
FERMT2
VGLL3
ZFPM2
FRMD6
DZIP1
ZEB2
CCDC80
MSRB3
CLIP4
STON1
IL1R1
FBXL7
JAM3
TSPYL5
NRP2
GAS1
KCNE4
CACNA2D1
QKI
GPC6
GFPT2
DCLK1
AMOTL1
MAP1B
ITGA5
ZNF521
AKT3
CNRIP1
PDLIM3
ECM2
GALNT15
PABPC4L
PTPRM
PRICKLE1
TRPS1
NAP1L3
VIM
FAM110B
AKAP12
MCC
ZNF667
SYNC
SYNE1
CFH
NRP1
PHLDB2
ATP8B2
MYO5A
CAV1
CYP1B1
SLIT2
C14orf132
ANGPTL1
MITF
MRAS
MEIS1
RHOJ
PDE1A
DSEL
FEZ1
CALD1
OSMR
PRICKLE2
SGCE
SNAI2
CRYAB
THSD7A
TNS1
BOC
DOK5
WWTR1
SPARCL1
LRCH2
CRISPLD2
CDK14
TCF4
PALMD
NLGN4X
RBMS3
NEXN
RNF180
TCEAL7
BEND6
FGF7
EBF2
VEGFC
ATP2B4
HSPB8
FBN1
IFFO1
OLFML1
CILP
GLT8D2
JAZF1
BCAT1
SGCD
LAYN
HEG1
TGFB3
NR3C1
GNB4
PLEKHO1
ARMCX1
MGP
ZNF532
AXL
MEOX2
TIMP2
ZFHX4
CHST11
PLN
PECAM1
ANK2
MMP19
STEAP4
PKD2
MICU3
LAMA4
LYVE1
NXN
TRPC1
JAM2
FGFR1
CCBE1
DPYSL3
CFL2
TMEM200B
AOC3
EFS
FILIP1
PEG3
PDGFRL
PCDH7
TSHZ2
PRRX1
SPOCK1
FAM20A
SERPINF1
SLIT3
MLLT11
PRDM6
KCND2
EBF1
C1orf54
PALLD
RAB31
ZNF677
MAF
ELK3
PRKD1
ENOX1
COL24A1
C8orf88
LDB2
ANGPTL2
NOX4
DNAJB5
PMP22
RNF150
FAP
EHD2
C3orf80
RUNX1T1
ITGAM
MEDAG
ST3GAL6
FBXO32
CHST15
PLXDC2
TUBB6
NRK
GGT5
BVES
PTGIS
BHMT2
SRPX
UBE2QL1
BCL6
ENTPD1
SYT11
SERPING1
CDH2
CCDC88A
ARHGAP24
VSTM4
DCN
P4HA3
LATS2
SDC2
MSN
DSE
MAFB
TPST1
PDZRN4
ABCC9
HTR2A
GAS7
C1orf162
C1R
SAMD4A
DAAM2
PDLIM7
TMEM45A
FCGR2B
RASSF2
ITPR1
CNTN1
PRELP
EVC
C1S
S1PR3
ZNF25
MYLK
SH3BP5
CD93
GJA1
ADAMTS1
P2RX7
FSTL1
DACT3
PDE2A
HTR2B
COL6A2
CSGALNACT2
C5AR1
VCAN
PLEKHO2
PXDN
GYPC
SFRP2
ST6GALNAC5
ERG
MYCT1
ABCA6
CXCL12
LMOD1
ADAM12
COPZ2
TMTC1
ALPK2
SERPINE1
OLFML2B
KCNMB1
DLC1
EFEMP2
KLHL5
AEBP1
COL6A3
ANTXR1
WIPF1
WBP1L
BASP1
CD163
RGS2
MDFIC
PPP1R18
TAGLN
IGF1
CDO1
TRO
GPR176
BCHE
TM6SF1
ELOVL4
LMCD1
NUAK1
CLEC1A
SLC9A9
EMP3
DENND5A
FGF1
LOX
MRC2
THBD
CNTNAP1
EMILIN1
COL5A2
JAKMIP2
FBLN5
RASSF8
TWIST2
LDOC1
FLI1
CYS1
SSPN
GEM
S1PR1
CLEC2B
CAV2
CHRNA3
PTPN14
HTRA1
MRC1
CCDC8
ASPN
MFAP5
ARHGEF6
CYYR1
POPDC2
TCEAL2
LRRK2
KCNT2
RHOQ
FLNA
CTSL
TNFAIP6
GNG11
NEFH
MAP1A
CDH11
ARHGAP31
NEGR1
GPNMB
ADAMTS3
AVPR1A
COL3A1
LAMB2
OMD
MEF2C
BACH2
THBS4
PAPPA
KCNJ15
LIX1L
PPP1R3C
CDH19
MEIS2
PLA2G5
FXYD6
EFEMP1
GJC1
MAP7D1
FNDC1
CLIP3
HMCN1
EVC2
COX7A1
IGFBP5
STK32B
ARL4C
EML1
KCNJ8
PIEZO2
RAI14
LAMC1
CHSY3
RERG
HLX
C7
COL15A1
SPARC
CYBRD1
COL8A2
SCG2
LUM
TLR1
UBE2E2
ISM1
SRGAP2C
RIMKLB
CMTM3
MYL9
FCN1
MMP16
HSD11B1
DOK6
PREX2
MMRN2
TCEAL3
SIRPB2
TMEM47
KANK2
CSF1R
MRGPRF
CLIC4
AGTR1
BICC1
TNC
RAB7B
SUSD5
PDGFC
TIE1
MXRA7
SALL2
GLIS2
DPYD
NAV3
CPXM2
SVEP1
LOXL3
SYNPO2
COL8A1
SLC1A3
TGFB1I1
COL6A1
OLR1
TSPAN4
RASL12
ETS1
PGR
CALHM2
ARSI
KCNN3
CR1
MSR1
DPT
SMARCA1
MS4A7
THEMIS2
C3AR1
STOM
RBMS1
TSC22D3
SGIP1
PDGFRB
CD109
HSD17B6
TUBA1A
FIBIN
MN1
CLEC5A
TWIST1
FBLN2
EVL
EGR2
LY96
MAMDC2
CLDN11
FZD1
SHE
FHL1
FIGN
ADAMTS5
TEK
VCAM1
FYN
SLA
FZD4
F13A1
POSTN
SVIL
KCNMA1
SULF1
EBF3
FST
KLHL4
RBPMS2
LTBP2
VSIG4
BGN
SLC8A1
NUDT11
THBS1
COL14A1
NCKAP1L
ITGA7
PABPC5
TENM4
CNTN4
ABCA1
CALCRL
DACT1
GADD45B
MXRA8
TLR2
GPX8
UCHL1
GLRB
CD84
CNN1
HDAC9
GABARAPL1
ANKRD6
GAP43
ARHGEF17
RFTN1
LRFN5
FAM229B
C1QTNF7
CCDC102B
RGS4
CSRP1
ADAP2
PLXNC1
TIMP3
COL5A1
CRISPLD1
TUSC3
ARMCX2
MMP14
CD36
GNG2
CYTL1
MS4A4A
EMCN
CYP27C1
RUNX2
CERCAM
DOCK4
PARVA
FABP4
IGFBP6
ST8SIA1
COL1A2
CCL2
EVI2A
PCOLCE
KLF9
A2M
GNAI2
DIXDC1
CHST3
ADAMTSL4
SDK1
BAALC
PRR16
RSPO3
LAMA2
GREM1
ADAMTSL3
PNMA1
SCN7A
ITGB1
ACTA2
AMPH
MAP3K3
GIMAP4
CPEB1
SLC2A3
PI15
CAP2
CD14
HS3ST3A1
ANKRD35
VCL
ROR2
SETBP1
NPR3
HCLS1
COL16A1
FCGR1B
LGALS1
ADAMTS2
MXRA5
LAIR1
TTC28
IL10RA
OGN
GIMAP8
FILIP1L
THBS2
SPHK1
TNFSF8
PBX3
PINLYP
FN1
MFGE8
PTGER3
PIP4K2A
C3
RCN3
SYNDIG1
JPH2
NDN
CLIC2
ANXA1
FGF10
ATP10A
DIP2C
TRIM6
ITGB3
TMEM255A
ITPRIP
PILRA
CHL1
KATNAL1
NKX3-2
ARHGAP20
TFEC
MAP4K4
DYSF
CTSK
COL10A1
COL18A1
SLFN11
LTBP1
CD86
TFPI
PEA15
RECK
AHNAK2
NFATC1
ZBTB16
SLC11A1
TPM2
FAM13C
HSPB7
DNAJB4
ABLIM3
GPRASP1
PLXND1
MAB21L2
PTGS1
PHF21A
MMP2
SASH1
CHSY1
PTGFR
KLHDC8B
LILRB2
CCR1
ZNF469
RASGRP3
CCDC69
GLIPR2
FKBP7
CYP7B1
RGL1
CDH5
CASQ2
ITGAV
DOCK10
GPX3
PCDHB7
THY1
MARCO
SPOCD1
DPEP2
CTSB
SFMBT2
GLI2
FGF2
PTX3
NAGK
PTHLH
FCGR2A
KLHL6
PRKCB
DOCK2
MACF1
LHFPL2
PPFIA2
SLAMF8
PDLIM4
RTN1
GPR183
MAP2
ABCA8
SIGLEC1
LOXL1
MOXD1
TREM1
HCFC2
ZBTB47
GPM6A
ATP8B4
ZBTB4
HECTD2
CLEC7A
AIF1
MAN1C1
NLRP3
PRIMA1
FGR
ABI3BP
TXNDC15
ZDHHC15
FAM171B
RBFOX2
LMO3
NCF2
CLEC14A
AP1S2
CYTH4
MCAM
ADCYAP1
SV2A
NNMT
SRGN
TMEM119
MMRN1
CPQ
ATP1A2
MEF2A
GPR68
SOX11
INHBA
SSBP2
SFRP1
KMO
MS4A14
CALU
TNFSF13B
TGFBR1
SNX18
HEY1
PCDH12
BTK
MAP6
TRPC6
COL12A1
CPXM1
OAZ2
NOTCH2
MNDA
ITGB2
MYH10
CTHRC1
GMFG
FAM107A
FHL5
LAMP5
DGKI
PIK3R5
LILRB1
BTBD19
CHN1
COL5A3
GLIS3
LAPTM5
TMEM140
FBLN7
STARD8
PDE4DIP
PSAP
PCDH9
TRIB2
LY86
LCA5
ADAM23
GIMAP1
KIF26B
AGPAT4
HOPX
SCN1B
SNED1
GIMAP6
NACAD
CD34
HCK
NLRC4
FAM124B
RARRES2
RAB23
RCSD1
AOX1
IGFBP4
LMO2
ALOX5AP
ACVR1
RAB8B
GJA5
DKK3
MS4A6A
AFAP1L1
CD59
NID2
ITGBL1
FBLN1
CRIP2
MYH11
MEX3B
RASSF4
ANXA5
CSRP2
CSF2RB
FRMD4A
ADAMTS16
CDC42EP3
PCDH17
APOE
SPSB1
HIVEP2
PARVG
CHRDL1
NLRP1
RARB
CLU
PRPH2
COL1A1
ARMC9
ITGA1
COL13A1
CALB2
APBB1IP
COL4A2
ACTC1
CD53
CLEC11A
LRRC32
HK3
COMP
HSPG2
VASH1
TLR8
ECSCR
FPR3
SYDE1
IRAK3
TRPV2
C1QTNF3
LCP2
LILRB4
IL6ST
CHRDL2
CPT1C
CYLD
SRGAP2
COL11A1
UGCG
SERPINH1
SORCS2
ADCY2
STAB1
NID1
ADAMTS12
SLFN12
LSP1
SLC24A3
MILR1
SYNM
TWSG1
PCDHB5
TSPAN2
EID1
ARHGAP29
OSCAR
MYO1F
TTC7B
PALM
MAGEL2
TUB
BEX4
NBEA
FCER1G
ACKR1
ADRB2
ZNF512B
SLC6A1
TYROBP
EID3
ENG
SOX17
GNB5
PTAFR
VWF
ZNF626
NAV1
PXDC1
FAT3
DEGS1
RGMA
TLR7
LILRA2
GPM6B
MAGEH1
LIFR
FNBP1
NR4A3
MCTP1
STX11
CHST1
FMNL3
HSD17B14
CEP85L
CD248
TMEM100
HIC1
SCARF1
SH3PXD2A
ARHGEF25
HSPA12B
ZFYVE1
HAVCR2
PCDHB4
EPHA3
LPAR1
KCTD12
SFRP4
FAM20C
PRNP
SLC15A3
PLCL1
LILRB3
ITGAX
ADAMTSL1
SAMSN1
TIMP1
IQCA1
EVI2B
ITGA11
HTRA3
TNFSF4
DOK3
ANTXR2
AQP9
ANKRD44
ETV1
HEYL
RCAN2
C1RL
RDX
DOCK8
TMEM204
CD37
IKBIP
ISLR
NXPE3
DPY19L2
CD33
NOTCH3
CCL18
ST8SIA4
ZIK1
SOX7
PDPN
RNF144A
NPR2
TREM2
GIMAP7
C1QA
MYADM
ZCCHC24
FBXL22
SERINC1
PEAR1
DCBLD2
MFAP4
KCNAB1
RFTN2
PLCG2
TIAM1
TANC2
CYBB
IFI16
ARHGAP25
FUT11
BNIP2
CD300LF
TCF7L1
PDE7B
ADAMTS6
FAM126A
SH3PXD2B
CLEC4E
RAB2B
MPPED2
LRRC17
ZNF281
YPEL4
SSH1
IGFBP7
MATN3
DCSTAMP
FPR1
PDCD1LG2
CAMSAP2
ZNF331
SYNPO
MYOF
UNC5B
ZNF385D
C4orf3
HOXB2
STAT2
EFHD1
CMKLR1
PLEKHG2
LIMS2
VAMP5
ALDH1A3
SWAP70
NR2F2
FHL3
SELP
ATXN1
TGFB2
SEC14L1
AR
SGK1
RORA
CTSO
VASN
CSPG4
SCARA3
SGTB
MMP13
CITED2
RPS6KA2
EHD3
SEMA3G
AKAP13
ANGPT1
GPR84
RNASE2
PIK3CG
RGS16
PENK
BMP1
NOVA1
ZNF382
LSAMP
PODN
C1orf216
PTPRC
SOCS3
SEC31A
LST1
MTMR9
CORO2B
CREM
CTIF
CADM1
TLL1
TRIM22
SCUBE2
SLC39A13
DOK2
PLXDC1
LPP
PIAS3
GLIPR1
CCL8
CARD8
RASSF5
GPR137B
PRKG1
PIK3CD
COL4A1
ANXA6
RNF175
CD72
PTN
FAM114A1
CYSLTR1
TTBK2
GULP1
HS3ST3B1
LOXL4
PREX1
SHC4
SCPEP1
BCL2A1
APOD
FKBP14
KERA
CCDC50
CTSF
PLAC9
PPP1R12B
SMARCD3
RNF144B
ENPP2
MPRIP
KANK4
FAM168A
APLNR
GPR161
FGD5
ICAM1
SPP1
C1QTNF6
KLHDC1
TGFB1
GNA12
RELN
ESAM
NPR1
CBX6
NAP1L5
HVCN1
LYST
OLFML3
ADORA3
STARD9
LCP1
DUSP1
AMIGO2
PLA2G4C
DCAF5
SLC16A2
PPP1R12A
CCL7
PCSK5
HIF1A
CSF3R
PNRC1
ARHGAP30
LILRA6
FBXL5
MEIS3
BCL6B
PDGFRA
PHACTR1
RBP7
CCL21
CXCR4
LRRC15
CCR2
SELL
LAT2
ABL2
ANKDD1A
TBCEL
PRAM1
EPYC
PDGFB
INPP4A
PDE5A
ELL2
PLAT
DRAM1
ASB2
GAB3
PLXNA4
C8orf48
HAND1
LRRN4CL
CCDC184
CD180
SPI1
APOC1
ENPEP
SSC5D
DTNA
DCBLD1
FMNL1
SLMAP
RGS1
SUGCT
ITGB5
C1QC
DES
NRROS
MAP3K7CL
SH2D3C
NCF1
DYNC2H1
FCHSD2
C1QB
SH2B3
FLT4
ACSS3
SHANK3
FAM124A
HGF
HAPLN3
ROBO4
MFSD1
PLEK
MSC
KLF8
PTGIR
BDH1
SAMHD1
CDK17
KLF2
PYGO1
MYOCD
PRKCH
TCTEX1D1
FLT1
OSTM1
SHC1
CD300A
CD4
CCM2L
EDNRA
GPR65
PJA2
TSPAN18
EDIL3
EPB41L3
CD83
GIT2
GPSM1
NTNG2
LZTS1
C11orf96
PBXIP1
LAMB1
SIGLEC7
KCND3
RAB42
CCR5
FGL2
LOXL2
ANKRD65
TAGAP
FOXN3
STC1
NUMBL
PGM5
PLK2
DCHS1
CD69
FNDC4
YPEL5
LBH
RHOH
ILK
IL18BP
SPON1
CHST14
ALDH1L2
BACE1
PEAK1
ADPRH
ZNF471
ADAM19
HS3ST2
ARL10
AHNAK
KDR
EGR3
LRRC25
PRND
GPR85
IDS
TPM1
CYTIP
IGSF21
RAMP3
UACA
ITM2A
HLA-DPB1
CREBRF
CD99L2
TPM4
KIFC3
CLEC4A
PDE4B
CPED1
ZBTB46
SCN9A
LIMS1
PAM
NCAM2
NAP1L2
GXYLT2
SLC16A6
AP1M2
EHBP1
WDR47
WAS
PANX1
SLC25A10
TSPAN9
PDE10A
SOCS5
EMP1
TTYH2
MAP4
PDLIM2
STK10
GFRA1
SLC7A7
SLC25A15
STX2
SPRY1
MPEG1
PLAU
ZNF135
AFF3
IL10
BICD2
SLFN5
MS4A2
ADAM33
CNIH3
ITK
ANKRD50
IGSF6
LPAR4
WDFY4
TMOD2
TBC1D9
SNN
FCGR3B
GJA4
HIVEP3
BTG1
MMP9
F8
SUCNR1
PPEF1
TNFAIP3
GPR34
MAPK10
GBP1
ARHGAP9
USP51
GSTM5
IL7R
IKZF1
MR1
GBP5
NFIL3
GPX7
ITGAL
PDLIM5
FOXS1
SLC22A17
DNAJC18
GSN
TMEM52B
IL21R
IBSP
CNPY4
S100A8
SELE
DYRK3
DENND3
ELMO1
TRAF3IP3
TERF2IP
BHLHE22
MARVELD1
ITPKB
KIF1B
CXorf21
ATP10D
CORO1C
MTCH2
CLDN5
GPR35
GUCY1A2
ZNF436
SMIM10
COL22A1
SCN4B
CLIP1
PAMR1
EID2B
EOGT
OR51E2
TM4SF18
FES
RXFP1
CARD6
RAB13
SOX5
HOOK3
GM2A
EMILIN2
SORBS1
ADH1B
INMT
ITGA4
PLA2G7
PLEKHH2
SLC38A6
ADD1
OLFML2A
BMPR2
CYB5R3
ZNF568
SP110
SECISBP2L
RECQL
MFAP2
APBB1
APBA2
CSDC2
RGS19
CSF1
TNFAIP2
ASPA
NREP
KCTD11
MPST
NPTN
HECW2
SERTAD2
CCL19
OPTN
TMEM108
PTTG1IP
HMOX1
CPEB4
LILRB5
FZD2
CD28
FRY
MOB3A
PPP1R16B
DIO2
TRIM61
STOX2
NPL
HPGDS
IGFBP3
CCL13
PARD6G
ZNF781
LPXN
HHEX
C16orf54
HLA-DPA1
ITSN1
PLSCR4
OSBPL8
PIP5K1B
SIGLEC9
SMAP2
PDZRN3
ACTG2
CSGALNACT1
ST3GAL1
PER3
AKR1B1
RNF146
RBPJ
MAGI2
MAPRE2
GNS
TRPC4
TBC1D1
SNX1
PHYHD1
GLT1D1
NOP16
FAM167B
WDPCP
RBPMS
GBP2
ZNF418
SIRPA
CYGB
TNFAIP8L2
FMOD
MAP3K8
SOD2
IL6
GPR1
CASS4
SIGLEC10
RNF11
KLHL20
RUSC2
DUSP5
MAST4
NEK7
KDF1
IL16
CDYL2
RGS17
MORF4L1
SASH3
FAAH
TPBG
PICALM
BPGM
NCAM1
IFIT2
HEY2
CAND2
CD80
IQSEC1
ADAMTS14
KIAA1755
MEOX1
MASP1
DTX3
RGS18
RCBTB2
TXLNB
CD209
CRTC3
PRKAR1A
P2RY14
FAM160B1
CD276
ACP5
IFIT1
B3GNT9
PODXL
RBMS2
F2R
HIP1
MSANTD3
AASS
SH3BGRL
PFKFB3
LEPROT
CCL4
CDH13
G0S2
FER
S100B
AQP1
HLA-DMB
PCDHB15
DMXL2
FTO
ZNF304
NIN
SHISA4
FEZ2
PAPLN
CUBN
SLCO2B1
SCARF2
HSPA6
RRAGD
CYP26B1
BATF3
GNAI1
RSAD2
CYP2U1
B3GALNT1
CD320
FOSL2
SAPCD2
S100A4
SNX9
DST
TBC1D19
CD300C
CRYBG3
SLC12A6
SH3RF3
CDT1
MRPL12
EPB41L4B
SLC38A2
SEC23A
CTSG
COL21A1
PPM1F
SAMD9L
PPP4R1
ADAMTS18
FAR2
ADAMTS9
NLRC3
TMEM106A
NDRG4
AIDA
PTBP2
P2RY12
TRAM2
IL4R
PAFAH1B1
RNASE6
ATL3
OGFRL1
PPP3CB
ARRDC3
OLFM1
ZNF540
ARHGDIB
PRDM1
VIP
FGD6
TMEM263
GPSM3
ROCK1
KCTD10
CP
CHRD
CYTH3
PI4K2A
WDFY3
WDR7
DUS1L
HERC5
COMTD1
PLAUR
ZNF671
SNX10
WWC3
CACNA2D3
MIPEP
RCAN1
ICAM2
RAB9B
DUSP3
GINM1
DIRC1
PIAS1
FPR2
HLA-DRA
SAV1
TOR1AIP1
ADAM28
CCDC3
WSB1
ARHGEF3
FAM114A2
TNFAIP8
ACTR1A
BTN3A3
RBM43
PDE4D
PIM1
PGBD1
COL7A1
MAP9
N4BP1
IL2RA
P2RY13
SMURF2
GPR4
EPHA7
GATA3
AURKA
PRKAB2
TRIM23
AMPD3
VAV1
SERPINB9
SLC29A2
ZCCHC18
SPATS2L
ZFP82
GNAL
PPT1
TCP11L1
PLVAP
GAPT
BHLHE41
MX2
RAP1A
SLC45A1
KIF3C
ATP6V1B2
SLC39A6
SP100
FAT4
CDKN2B
RNF115
GLB1L2
NAIP
C8orf34
ENDOG
TXNIP
RIT1
PRDX2
GAL3ST4
MRPS25
PIK3R6
GPR171
PPP1R14A
EGFLAM
WDR26
ANGPT2
RASIP1
TBXA2R
BMP6
TPP1
BCL2L2
CRMP1
TEAD1
YDJC
GIPC2
HSPA2
ZDHHC23
ARHGEF15
CD63
GLUL
PLA1A
STK17A
CHST10
HNF4A
BBX
STAT4
RASA3
RNF217
SLC43A3
CPM
TBC1D2B
PCDHB3
DDX58
ARHGAP28
ERRFI1
ZNF569
CFLAR
MAPKBP1
MFNG
PIK3AP1
SKA3
FAM107B
RHOB
TCEAL4
DCUN1D3
STX12
TMEM169
CAMK4
RGCC
RABGAP1
CTF1
NOL12
SLC20A1
ZFP92
FCAR
CC2D2A
LSM7
IFIT3
LIPA
PRKAR2B
SGCB
TCEA2
TMEM30A
SPIN1
ID4
CD40
BIN2
MYH9
KLF6
POC1A
ADAT3
TIMM13
RAMP2
SLC35B4
RNF19A
TNFRSF9
CPA3
A4GALT
SACS
ZNF804A
TDRP
PHTF2
HERC1
FYCO1
RNF126
SLC37A2
CLEC10A
TCN2
ARHGAP1
LRP12
REEP3
MRPL4
PTPN21
KRTCAP3
KLF12
CENPM
CYC1
PLOD2
NCKAP5L
MARCKS
KLHL2
YIPF5
PRRG3
NKIRAS1
TMEM54
EPAS1
IFRD2
ZNF106
ARRDC1
RAB33A
GGH
GJB2
GREM2
VNN2
WASF1
ATP8A2
GLI1
HOXD8
SNRK
TMEM52
CLEC4D
KAT2B
GPRC5B
VIL1
DAAM1
ASAP1
RPS6KC1
PPP3CA
SOAT1
FAM155A
MBNL1
NUDT5
CSTA
CETP
USP32
CPVL
VGLL4
PURA
LHX6
ATP10B
SIRPB1
TSPYL4
ZNF354C
NDST1
CENPV
RAB39B
FBXL2
RUFY3
PDGFD
ARFGAP3
PAFAH1B3
EFNB3
DSTYK
ARL6IP5
CNN3
PPP1R16A
SGK2
SPC24
HAS2
ATL1
ZSCAN18
CDH6
LXN
SNX6
LAMC2
HSDL2
BAIAP2L2
PLS3
TMX3
L1CAM
CXCL13
UBE2H
RASGRP1
FAM13B
PIK3CA
BTN2A2
ATP6V0D2
PDK4
POLR2H
EPS15
USP44
PLEKHG1
PXMP4
GALE
BEND3
TRAP1
TMEM26
RSPO2
RGS3
STAP1
CCDC71L
TRAM1L1
PTPN22
SPOP
CORIN
TMEM86A
NOTCH4
PGF
C14orf28
AFAP1
TDO2
CSRNP2
CD300LB
NHSL2
FAM219A
ACSL1
TAB2
SMPD2
TMEM43
MAP3K12
PTGDS
STX7
STARD10
CDH17
ZMAT3
KIF5A
SESTD1
ARID5B
OSBPL9
BBS4
TPSAB1
OBSL1
CHST2
ING5
ITIH5
ZNF296
TSPAN11
BHLHE40
FAXDC2
SFXN3
NLGN4Y
ROBO1
TAL1
TRAPPC6B
TPSB2
MEF2D
B4GALNT1
TP53INP1
SLC35G2
UBE2Q2
P2RY6
KLF7
SEMA4C
FOXO1
PLCL2
SMAD7
CREBL2
NRBP1
PPIC
BACH1
CCR8
TMEM125
CYTH1
GRID1
RELL1
FBXO30
ARSB
LRRFIP1
TJP1
ZDBF2
CTSC
ATP6V1G2
OSM
PGM2L1
PURG
REV3L
RABEP1
CHI3L1
IGIP
IL1RAP
SNRPA
MAFF
GBE1
BIRC3
ZNF829
IL1RN
NAALAD2
MEP1A
UQCRQ
SGMS2
UQCRC1
CAP1
FBXO17
MRPS34
MTFP1
ZNF423
ARPP19
GLT8D1
SAMD11
STMN2
CDK2AP1
PRR7
PKIG
KIT
RAB30
ZDHHC17
SAMD9
CD48
EXTL2
VEZT
ACKR3
SENP7
ADAMTS4
TRANK1
PPP3CC
FANCG
C1QTNF2
TGFBR2
CCR7
RASSF9
AHR
IGDCC4
TMX4
S100A3
STAT3
ADAM17
B2M
MMAB
MOGAT3
LAPTM4A
ZC2HC1A
CERS5
PTGS2
VAMP4
ZFAND3
NDEL1
HIGD1B
RAB12
UVRAG
MCAT
MYO9A
CAPN15
SEC24D
BBS9
ZRANB1
TOX2
NME1
ARNT
CHURC1
CCPG1
TES
SUN2
MCL1
LILRA5
FLVCR2
ILVBL
DYNC1LI2
TRPC3
DDX60L
SAMD8
[truncated: 1,039 more rows]
