# Supplementary material for: Development of an anoikis-related gene signature and prognostic model for predicting the tumor microenvironment and response to immunotherapy in colorectal cancer
Source: Front Immunol. 2024 May 8;15:1378305. doi: 10.3389/fimmu.2024.1378305 (PMC11109372; doi:10.3389/fimmu.2024.1378305)
Supplement: Supplementary file 9 [file Table_8.xlsx]

## Sheet: GSEA
GeneSet，ID，Description：The name and description of the gene set setSize：The number of genes contained in a gene set ES：enrichmentScore NES：Normalized Enrichment Score qvalues：FDR（false discovery rate） rank：When the enrichment fraction ES is maximum, the position of the corresponding gene is in the sorted gene list. leading_edge：tags；Represents the percentage of the core gene in the gene set.list;…
GeneSet	ID	Description	setSize	enrichmentScore	NES	pvalue	p.adjust	qvalues	rank	leading_edge	core_enrichment
REACTOME_EXTRACELLULAR_MATRIX_ORGANIZATION	REACTOME_EXTRACELLULAR_MATRIX_ORGANIZATION	REACTOME_EXTRACELLULAR_MATRIX_ORGANIZATION	290	-0.562625	-2.3854	1e-16	7.4425e-14	5.93158e-14	2498	tags=44%, list=15%, signal=38%	ITGB1/COL24A1/BSG/LAMA4/PDGFB/MATN3/ICAM2/ITGA1/ITGA7/FBLN5/COL13A1/P4HB/ACTN1/ADAMTS5/LAMC1/THBS1/ITGA4/TGFB2/ADAM19/CTSD/ICAM4/LOXL3/MMP8/COLGALT1/ITGA11/MMP19/FMOD/LTBP2/LAMC2/ITGAL/P4HA3/LTBP3/VWF/PPIB/JAM3/ITGAE/BMP4/ADAM15/ITGAV/ADAMTS1/COL8A2/COL4A2/PRSS2/PCOLCE2/FGF2/ITGA3/LOXL2/EMILIN2/EFEMP1/LAMA5/P4HA1/COLGALT2/ADAM9/COL16A1/MFAP5/LAMA2/PLOD1/COL4A1/MMP14/PECAM1/MMP2/EMILIN1/CTSB/MMP7/…
REACTOME_SIGNALING_BY_INTERLEUKINS	REACTOME_SIGNALING_BY_INTERLEUKINS	REACTOME_SIGNALING_BY_INTERLEUKINS	440	-0.520114	-2.27813	1e-16	7.4425e-14	5.93158e-14	2312	tags=33%, list=14%, signal=29%	CRLF2/NDN/FASLG/JAK3/P4HB/IL3RA/IL1RAP/MAP2K4/F13A1/TNFRSF1B/FOS/PSMD8/CCND1/IL9R/PSMB3/STX1A/PTPN12/NKIRAS1/MAPK11/ANXA2/PTPN2/CEBPD/TNF/PSMD9/SOD1/BOLA2/CD4/PSMC4/AKT1/PIK3CD/CXCL2/STAT2/S1PR1/PSMD2/CD80/IL7R/IL20RB/PSMC1/PSMC3/S100B/CCR2/IL15RA/PTPN13/IL23A/PSMB8/NFKB2/PTPN7/HMOX1/IL13RA2/PSMB5/FGF2/IL21R/IL18/LIF/HSP90B1/LAMA5/GATA3/BIRC5/CSF2/PSME1/RIPK2/USP14/CSF2RA/TIFA/NLRC5/PSMC6/IL15/MA…
WP_NETWORK_MAP_OF_SARS_COV_2_SIGNALING_PATHWAY	WP_NETWORK_MAP_OF_SARS_COV_2_SIGNALING_PATHWAY	WP_NETWORK_MAP_OF_SARS_COV_2_SIGNALING_PATHWAY	209	-0.607579	-2.48026	1e-16	7.4425e-14	5.93158e-14	1993	tags=37%, list=12%, signal=33%	CTSD/RRAS/TNF/CD4/AKT1/CXCL2/APOA2/IFI27/RRM2/CXCR1/NFKB2/NLRP3/FAM83A/CFI/CD247/SKAP1/FGF2/EIF4EBP1/ITGA3/IFIH1/IL18/BIRC5/APOD/IFITM3/AHR/PARP2/IGFBP3/JAK2/CD2/DDIT4/CD8A/CCR5/CTSB/IFNG/C1R/C1QBP/FN1/CCNB1/CCL21/HIF1A/CXCR2/C1S/COL7A1/CFH/IFIT1/CXCL3/CXCL16/MX1/CCL26/APOL1/CCL5/STAT1/APOC1/CXCL1/IFI44L/CTSL/FYN/CD14/LCK/HLA-DRA/OAS2/IL1B/SERPINE1/CXCL13/CCL2/IL1R2/CD163/CXCL6/CXCL9/CCL4/IFI6/IL…
WP_OVERVIEW_OF_PROINFLAMMATORY_AND_PROFIBROTIC_MEDIATORS	WP_OVERVIEW_OF_PROINFLAMMATORY_AND_PROFIBROTIC_MEDIATORS	WP_OVERVIEW_OF_PROINFLAMMATORY_AND_PROFIBROTIC_MEDIATORS	117	-0.699962	-2.67285	1e-16	7.4425e-14	5.93158e-14	715	tags=29%, list=4%, signal=28%	CXCL17/IFNG/CCL7/CCL21/CCL13/IL11/TGFB1/CXCL3/CXCL16/CCL26/CCL5/OSM/CXCL1/MMP9/TNFSF13B/IL24/IL1B/CXCL13/CCL2/IL1RN/CXCL6/CXCL9/CCL4/IL6/CXCL11/MMP3/CCL8/PPBP/CXCL10/CXCL5/CXCL8/SPP1/MMP1/CCL18
REACTOME_NEUTROPHIL_DEGRANULATION	REACTOME_NEUTROPHIL_DEGRANULATION	REACTOME_NEUTROPHIL_DEGRANULATION	446	-0.46929	-2.05751	2.86278e-16	1.7045e-13	1.35847e-13	2243	tags=29%, list=14%, signal=26%	GPI/NPC2/VCL/ARSB/TRAPPC1/TNFRSF1B/CR1/FGL2/CCT2/SERPINB3/ANXA2/HVCN1/MME/CTSD/MMP8/S100A7/CSTB/SERPINB1/RETN/PSMD2/LILRB3/ITGAL/GAA/PSMC3/CXCR1/ITGAV/SIRPA/PTX3/RNASE2/SERPINA3/QSOX1/TUBB/NCKAP1L/SIGLEC9/ALDOA/PRSS2/PNP/CRISPLD2/PGM2/CHIT1/GM2A/S100A11/RAP2B/GLIPR1/ARHGAP9/DOCK2/CLEC12A/GNS/CTSC/VAT1/RHOF/SLC2A5/PGAM1/FTH1/SERPINA1/PKM/HSP90AA1/FABP5/STOM/CDA/GSTP1/PECAM1/PLEKHO2/CTSB/LAIR1/DOK3…
KEGG_CYTOKINE_CYTOKINE_RECEPTOR_INTERACTION	KEGG_CYTOKINE_CYTOKINE_RECEPTOR_INTERACTION	KEGG_CYTOKINE_CYTOKINE_RECEPTOR_INTERACTION	250	-0.534647	-2.22986	2.77726e-14	1.37798e-11	1.09824e-11	2312	tags=33%, list=14%, signal=29%	CRLF2/CXCR6/FASLG/BMPR1B/IL3RA/IL1RAP/TNFRSF1B/IL9R/TGFB2/TNF/PF4V1/TNFRSF4/CXCL2/IL7R/IL20RB/CD70/CCR2/IL15RA/CXCR1/IL23A/CX3CL1/TGFBR1/IL21R/IL18/LIF/TNFRSF9/KITLG/CSF2/CSF2RA/IL15/PDGFRB/CD40/TNFRSF11B/FAS/PLEKHO2/IL1R1/CCR5/IL2RA/PDGFC/IFNG/IL2RB/CCL7/TGFB3/IL10RA/CCL21/CSF1R/CXCR2/TNFRSF18/CCL13/CSF3R/IL11/TGFB1/VEGFC/OSMR/CXCL3/CXCL16/TNFSF4/CCL26/CCL5/OSM/CCR1/CSF2RB/CXCL1/INHBA/TNFSF13B/I…
WP_BURN_WOUND_HEALING	WP_BURN_WOUND_HEALING	WP_BURN_WOUND_HEALING	71	-0.742224	-2.63969	7.86716e-14	3.34579e-11	2.66655e-11	1186	tags=46%, list=7%, signal=43%	S100A11/FST/IL15/PDGFRB/PECAM1/MMP2/SERPINH1/TAGLN/TGFB3/CXCR2/NOX4/DCN/FBN1/SCEL/SNAI2/TIMP1/ICAM1/CXCL1/COL1A2/INHBA/COL1A1/MMP9/LGALS1/IL1B/CCL2/CXCR4/TNC/S100A9/KRT6A/IL6/SFRP2/CXCL8/MMP1
REACTOME_INTERLEUKIN_4_AND_INTERLEUKIN_13_SIGNALING	REACTOME_INTERLEUKIN_4_AND_INTERLEUKIN_13_SIGNALING	REACTOME_INTERLEUKIN_4_AND_INTERLEUKIN_13_SIGNALING	105	-0.649246	-2.44933	1.59907e-12	5.95052e-10	4.74249e-10	2369	tags=52%, list=15%, signal=45%	NOS2/NDN/FASLG/JAK3/F13A1/TNFRSF1B/FOS/CCND1/CEBPD/TNF/AKT1/S1PR1/IL23A/HMOX1/IL13RA2/FGF2/IL18/LIF/HSP90B1/LAMA5/GATA3/BIRC5/HSP90AA1/SOCS1/BATF/JAK2/MMP2/FN1/VCAM1/HIF1A/BCL6/SOCS3/VIM/ITGAX/MUC1/TGFB1/ALOX5/STAT1/OSM/TIMP1/ICAM1/ITGB2/COL1A2/MMP9/IL1B/TWIST1/ITGAM/CCL2/ANXA1/IL6/MMP3/PTGS2/FSCN1/CXCL8/MMP1
REACTOME_IMMUNOREGULATORY_INTERACTIONS_BETWEEN_A_LYMPHOID_AND_A_NON_LYMPHOID_CELL	REACTOME_IMMUNOREGULATORY_INTERACTIONS_BETWEEN_A_LYMPHOID_AND_A_NON_LYMPHOID_CELL	REACTOME_IMMUNOREGULATORY_INTERACTIONS_BETWEEN_A_LYMPHOID_AND_A_NON_LYMPHOID_CELL	117	-0.620502	-2.36943	1.30106e-11	4.30363e-09	3.42994e-09	2754	tags=50%, list=17%, signal=41%	HLA-E/HLA-C/SLAMF7/ITGB7/LILRB5/ITGB1/ICAM2/SIGLEC7/CD3E/ITGA4/SIGLEC10/CD81/ICAM4/MICA/HLA-F/CD3D/SH2D1A/LILRA2/LILRB3/ITGAL/LILRA5/CD300C/CD96/CD247/SIGLEC9/LILRB1/KLRD1/CRTAM/LILRA6/CD40/CD8A/LAIR2/SIGLEC1/CD200/LAIR1/VCAM1/CD300A/CD99/HCST/CLEC2B/CD300LF/SELL/C3/LILRB4/OSCAR/COLEC12/PILRA/MICB/LILRB2/ICAM1/FCGR2B/TREM2/COL3A1/ITGB2/COL1A2/COL1A1/TYROBP/TREM1
REACTOME_CELL_CYCLE_MITOTIC	REACTOME_CELL_CYCLE_MITOTIC	REACTOME_CELL_CYCLE_MITOTIC	473	-0.420167	-1.85516	1.78436e-11	5.31205e-09	4.23364e-09	4067	tags=47%, list=25%, signal=36%	NUP93/PSMD3/PDS5A/CDC25B/TUBB4B/CKAP5/LPIN1/NUP37/SMC4/LIN54/SMC2/MCPH1/KPNB1/NUP43/PPP2CA/CDK2/AHCTF1/LPIN2/HAUS3/ANAPC11/PAFAH1B1/DYNLL1/NCAPG2/CETN2/ORC5/NEK7/PSMA5/NUP133/OPTN/ANKLE2/NUP205/POLE3/PSMC5/PSMD13/UBB/PPP2R5E/ODF2/POLD2/CDC23/HAUS6/RBX1/HSP90AB1/RFC1/DYNC1LI1/ACTR1A/NCAPD3/LIN9/PSMB4/PSMB2/NUP62/ANAPC10/RBBP4/MAX/RANGAP1/CENPI/TMPO/PSMB10/PSMD1/PSMD12/BUB1B/NUP160/NDEL1/SDCCAG8/CD…
KEGG_SYSTEMIC_LUPUS_ERYTHEMATOSUS	KEGG_SYSTEMIC_LUPUS_ERYTHEMATOSUS	KEGG_SYSTEMIC_LUPUS_ERYTHEMATOSUS	48	-0.769878	-2.50417	2.34196e-11	6.33821e-09	5.05147e-09	912	tags=42%, list=6%, signal=39%	CD40/IFNG/C1R/SNRPD1/HLA-DPB1/HLA-DQA1/C1S/HLA-DQB1/C3/HLA-DMB/C1QA/CD86/HLA-DPA1/HLA-DMA/FCGR2B/C1QC/FCGR2A/HLA-DRA/C1QB/FCGR3B
WP_TYPE_II_INTERFERON_SIGNALING	WP_TYPE_II_INTERFERON_SIGNALING	WP_TYPE_II_INTERFERON_SIGNALING	36	-0.814425	-2.47637	4.50147e-11	1.11674e-08	8.90028e-09	944	tags=53%, list=6%, signal=50%	SOCS1/JAK2/IRF1/SPI1/IFNG/IFIT2/SOCS3/TAP1/PSMB9/CYBB/STAT1/GBP1/ICAM1/ISG15/IL1B/REG1A/CXCL9/IFI6/CXCL10
REACTOME_COLLAGEN_DEGRADATION	REACTOME_COLLAGEN_DEGRADATION	REACTOME_COLLAGEN_DEGRADATION	64	-0.711971	-2.44501	6.3194e-11	1.44714e-08	1.15335e-08	1411	tags=53%, list=9%, signal=49%	COL8A2/COL4A2/PRSS2/ADAM9/COL16A1/COL4A1/MMP14/MMP2/CTSB/MMP7/COL5A3/COL18A1/MMP13/COL7A1/COL6A1/CTSK/COL6A2/COL5A1/MMP10/COL12A1/COL6A3/COL8A1/COL3A1/COL1A2/CTSL/COL5A2/COL1A1/COL15A1/MMP9/COL11A1/MMP12/MMP3/COL10A1/MMP1
WP_ALLOGRAFT_REJECTION	WP_ALLOGRAFT_REJECTION	WP_ALLOGRAFT_REJECTION	83	-0.666882	-2.41469	7.41415e-11	1.57657e-08	1.2565e-08	1985	tags=45%, list=12%, signal=39%	TNF/MICA/HLA-F/GZMB/CD80/HLA-DOA/CTLA4/TUBA1B/CD40/FAS/IL2RA/IFNG/CCL21/VIM/HLA-DPB1/HLA-DQA1/HLA-DQB1/TGFB1/C3/CD55/COL5A1/HLA-DMB/STAT1/C1QA/CD86/PRF1/HLA-DPA1/HLA-DMA/C1QC/HLA-DRA/IL1B/C1QB/CXCL13/GNLY/CXCL9/CXCL11/CXCL8
REACTOME_SEPARATION_OF_SISTER_CHROMATIDS	REACTOME_SEPARATION_OF_SISTER_CHROMATIDS	REACTOME_SEPARATION_OF_SISTER_CHROMATIDS	175	-0.533811	-2.13442	1.24511e-10	2.47114e-08	1.96946e-08	4061	tags=55%, list=25%, signal=42%	PSMD3/PDS5A/TUBB4B/CKAP5/NUP37/NUP43/PPP2CA/AHCTF1/ANAPC11/PAFAH1B1/DYNLL1/PSMA5/NUP133/PSMC5/PSMD13/UBB/PPP2R5E/CDC23/DYNC1LI1/PSMB4/PSMB2/ANAPC10/RANGAP1/CENPI/PSMB10/PSMD1/PSMD12/BUB1B/NUP160/NDEL1/PSMA4/UBA52/ERCC6L/CENPK/CENPE/UBE2E1/CENPH/PPP2R5C/CENPA/PSMD14/PSMA3/ZWINT/BUB3/PSMA1/CENPL/INCENP/CENPQ/NUDC/SEC13/PSMD8/ZWILCH/TUBB3/PSMB3/SPC25/CENPN/MIS12/TUBA4A/CDCA5/PSMD9/PSMC4/SKA2/CENPU/C…
REACTOME_PEPTIDE_LIGAND_BINDING_RECEPTORS	REACTOME_PEPTIDE_LIGAND_BINDING_RECEPTORS	REACTOME_PEPTIDE_LIGAND_BINDING_RECEPTORS	186	-0.528841	-2.12841	1.7484e-10	3.25311e-08	2.59269e-08	1693	tags=25%, list=10%, signal=22%	NMB/NPB/CCR2/GAL/GRP/CXCR1/CX3CL1/APLNR/ACKR1/ACKR4/F2R/EDNRA/AVPR1A/CCK/CCR5/CCL7/CCL21/CXCR2/NTSR1/CCL13/KISS1R/FPR2/CXCL3/PROK2/C3/CXCL16/CCL5/C3AR1/CCR1/CXCL1/FPR3/FPR1/CXCL13/CCL2/C5AR1/CXCR4/ANXA1/CXCL6/CXCL9/CCL4/NMU/CXCL11/PPBP/CXCL10/CXCL5/CXCL8
REACTOME_INTERFERON_SIGNALING	REACTOME_INTERFERON_SIGNALING	REACTOME_INTERFERON_SIGNALING	241	-0.490825	-2.04503	1.95443e-10	3.42255e-08	2.72773e-08	3605	tags=44%, list=22%, signal=35%	TRIM5/HLA-DQB2/IFNGR1/NUP133/NUP205/IFNAR2/SNCA/UBB/HLA-B/PIN1/TRIM46/YBX1/ABCE1/CHUK/GBP6/NUP62/GBP3/HLA-G/NUP160/FANCG/CDK1/DHX9/FCGR1A/NUP50/UBA52/CD44/IFI35/UBE2E1/NUP35/ADAR/HLA-E/HLA-C/ILF2/IRF9/FANCM/NUP155/SP100/PML/IFIT5/SEC13/NUP210/TUBB3/PTPN2/EIF4A3/HLA-F/TUBA4A/IRF8/STAT2/OASL/TRIM6/NPM1/IFI27/TUBA1C/PSMB8/HSPA2/NDC1/EIF2S1/TUBB2B/KPNA2/ISG20/IFITM3/MX2/TUBA1B/XAF1/SOCS1/GBP2/IRF7/JA…
WP_TYROBP_CAUSAL_NETWORK_IN_MICROGLIA	WP_TYROBP_CAUSAL_NETWORK_IN_MICROGLIA	WP_TYROBP_CAUSAL_NETWORK_IN_MICROGLIA	58	-0.725908	-2.45737	2.48965e-10	4.11761e-08	3.28168e-08	2248	tags=64%, list=14%, signal=55%	NRROS/ADAP2/NPC2/TNFRSF1B/LOXL3/CD4/MAF/LHFPL2/SH2B3/RUNX3/TGFBR1/NCKAP1L/HLX/IL18/CD37/RGS1/APBB1IP/CAPG/CYTL1/CD84/IL10RA/DPYD/ITGAX/SAMSN1/HCLS1/PPP1R18/IGSF6/C3/CXCL16/C1QC/ITGB2/PLEK/SLC7A7/ITGAM/TYROBP/NCF2/SPP1
REACTOME_COLLAGEN_FORMATION	REACTOME_COLLAGEN_FORMATION	REACTOME_COLLAGEN_FORMATION	86	-0.654131	-2.38117	2.80574e-10	4.19492e-08	3.3433e-08	1936	tags=49%, list=12%, signal=43%	LOXL3/COLGALT1/LAMC2/P4HA3/PPIB/COL8A2/COL4A2/PCOLCE2/LOXL2/P4HA1/COLGALT2/COL16A1/PLOD1/COL4A1/CTSB/MMP7/SERPINH1/COL5A3/COL18A1/MMP13/COL7A1/COL6A1/PXDN/COL6A2/COL5A1/COL12A1/PCOLCE/COL6A3/COL8A1/COL3A1/COL1A2/CTSL/COL5A2/COL1A1/COL15A1/MMP9/LOXL1/ADAMTS2/COL11A1/LOX/MMP3/COL10A1
REACTOME_INTERLEUKIN_10_SIGNALING	REACTOME_INTERLEUKIN_10_SIGNALING	REACTOME_INTERLEUKIN_10_SIGNALING	43	-0.763231	-2.43326	2.82488e-10	4.19492e-08	3.3433e-08	1985	tags=63%, list=12%, signal=55%	TNF/CXCL2/CD80/CCR2/IL18/LIF/CSF2/IL1R1/CCR5/IL10RA/PTAFR/CCL5/CD86/TIMP1/CCR1/ICAM1/CXCL1/FPR1/IL1B/CCL2/IL1R2/IL1RN/CCL4/IL6/PTGS2/CXCL10/CXCL8
REACTOME_CHEMOKINE_RECEPTORS_BIND_CHEMOKINES	REACTOME_CHEMOKINE_RECEPTORS_BIND_CHEMOKINES	REACTOME_CHEMOKINE_RECEPTORS_BIND_CHEMOKINES	54	-0.726098	-2.43032	2.95913e-10	4.19492e-08	3.3433e-08	779	tags=46%, list=5%, signal=44%	CCR2/CXCR1/CX3CL1/ACKR4/CCR5/CCL7/CCL21/CXCR2/CCL13/CXCL3/CXCL16/CCL5/CCR1/CXCL1/CXCL13/CCL2/CXCR4/CXCL6/CXCL9/CCL4/CXCL11/PPBP/CXCL10/CXCL5/CXCL8
REACTOME_DEGRADATION_OF_THE_EXTRACELLULAR_MATRIX	REACTOME_DEGRADATION_OF_THE_EXTRACELLULAR_MATRIX	REACTOME_DEGRADATION_OF_THE_EXTRACELLULAR_MATRIX	138	-0.566017	-2.19714	4.47755e-10	6.05893e-08	4.82889e-08	1555	tags=33%, list=10%, signal=30%	ADAM15/ADAMTS1/COL8A2/COL4A2/PRSS2/LAMA5/ADAM9/COL16A1/COL4A1/MMP14/MMP2/CTSB/MMP7/COL5A3/FN1/COL18A1/MMP13/DCN/COL7A1/COL6A1/HTRA1/CTSK/COL6A2/COL5A1/KLK7/ADAM8/MMP10/COL12A1/FBN1/TIMP2/COL6A3/TIMP1/COL8A1/COL3A1/COL1A2/CTSL/COL5A2/COL1A1/COL15A1/MMP9/COL11A1/MMP12/MMP3/COL10A1/SPP1/MMP1
REACTOME_INTERFERON_ALPHA_BETA_SIGNALING	REACTOME_INTERFERON_ALPHA_BETA_SIGNALING	REACTOME_INTERFERON_ALPHA_BETA_SIGNALING	75	-0.662897	-2.38934	5.1527e-10	6.66939e-08	5.31542e-08	3455	tags=55%, list=21%, signal=43%	IFNAR2/UBB/HLA-B/ABCE1/HLA-G/UBA52/IFI35/ADAR/HLA-E/HLA-C/IRF9/IFIT5/HLA-F/IRF8/STAT2/OASL/IFI27/PSMB8/ISG20/IFITM3/MX2/XAF1/SOCS1/GBP2/IRF7/IRF1/IFITM2/OAS3/SAMHD1/IFIT2/SOCS3/RSAD2/IFIT1/MX1/USP18/STAT1/IFIT3/ISG15/OAS2/IFI6/BST2
REACTOME_HOST_INTERACTIONS_OF_HIV_FACTORS	REACTOME_HOST_INTERACTIONS_OF_HIV_FACTORS	REACTOME_HOST_INTERACTIONS_OF_HIV_FACTORS	123	-0.586087	-2.25493	5.63905e-10	6.99477e-08	5.57474e-08	4212	tags=57%, list=26%, signal=42%	CDK9/SLC25A4/AP1M1/NUP93/PSMD3/NUP37/KPNB1/NUP43/AP1S1/KPNA1/PSMA5/NUP133/NUP205/PSMC5/PSMD13/UBB/RBX1/PSMB4/PSMB2/NUP62/RANGAP1/PSMB10/PSMD1/PSMD12/NUP160/PSMA4/NUP50/UBA52/BANF1/NUP35/PSMD14/PSMA3/NUP155/PSMA1/CD28/AP2B1/SEC13/PSMD8/PSIP1/NUP210/PSMB3/PSMD9/CD4/PSMC4/AP2S1/AP1S2/RCC1/PSMD2/NPM1/PSMC1/PSMC3/PSMB8/RAN/AP2M1/CD247/PSMB5/NDC1/APOBEC3G/HMGA1/PSME1/DOCK2/PSMC6/PSMB6/SEH1L/AP1S3/SLC25…
PID_INTEGRIN1_PATHWAY	PID_INTEGRIN1_PATHWAY	PID_INTEGRIN1_PATHWAY	65	-0.704925	-2.43293	6.11523e-10	7.28202e-08	5.80368e-08	2498	tags=63%, list=15%, signal=54%	ITGB1/LAMA4/ITGA1/ITGA7/F13A1/TGM2/LAMC1/THBS1/ITGA4/CD81/ITGA11/LAMC2/ITGAV/CSPG4/ITGA3/MDK/LAMA5/LAMA2/COL4A1/FN1/VCAM1/LAMB2/COL18A1/COL7A1/COL6A1/COL6A2/COL5A1/PLAUR/FBN1/COL6A3/ITGA5/COL3A1/COL1A2/COL5A2/COL1A1/CD14/PLAU/COL11A1/TNC/THBS2/SPP1
WP_COMPLEMENT_SYSTEM	WP_COMPLEMENT_SYSTEM	WP_COMPLEMENT_SYSTEM	89	-0.644138	-2.35681	8.71897e-10	9.98322e-08	7.9565e-08	2374	tags=43%, list=15%, signal=37%	CALR/ICAM2/F13A1/CR1/LAMC1/THBS1/F12/PTX3/GNAI3/CFI/LAMA5/SELPLG/CD40/GNAI2/ADM/PRNP/C1QBP/FCN1/CD93/SELE/C1S/DCN/CFH/SELL/C3/CD55/PLAUR/TLR2/CFD/IBSP/C3AR1/ICAM1/SERPING1/GNA15/FPR1/VSIG4/C5AR1/SPP1
REACTOME_CELL_CYCLE_CHECKPOINTS	REACTOME_CELL_CYCLE_CHECKPOINTS	REACTOME_CELL_CYCLE_CHECKPOINTS	241	-0.480751	-2.00306	9.33057e-10	1.02878e-07	8.19926e-08	3890	tags=48%, list=24%, signal=37%	NUP43/RAD1/PPP2CA/CDK2/AHCTF1/ANAPC11/PAFAH1B1/DYNLL1/ORC5/PSMA5/NUP133/PSMC5/PSMD13/UBB/PPP2R5E/CDC23/DYNC1LI1/PSMB4/PSMB2/ANAPC10/RANGAP1/CENPI/PSMB10/PSMD1/PSMD12/BUB1B/NUP160/NDEL1/CDK1/PSMA4/UBA52/CCNE2/ERCC6L/CENPK/CENPE/UBE2E1/MDM2/NBN/CENPH/PPP2R5C/MCM7/CHEK1/CENPA/DBF4/PSMD14/PSMA3/ZWINT/BUB3/PSMA1/RFC5/CENPL/INCENP/CENPQ/NUDC/SEC13/RFC4/PSMD8/ZWILCH/MCM3/PSMB3/SPC25/RFC2/CENPN/MIS12/PSM…
REACTOME_ANTIGEN_PROCESSING_CROSS_PRESENTATION	REACTOME_ANTIGEN_PROCESSING_CROSS_PRESENTATION	REACTOME_ANTIGEN_PROCESSING_CROSS_PRESENTATION	101	-0.603972	-2.27868	1.0317e-09	1.09692e-07	8.74231e-08	3582	tags=55%, list=22%, signal=43%	ITGB5/PSMA5/PSMC5/PSMD13/UBB/HLA-B/PSMB4/CHUK/PSMB2/PSMB10/PSMD1/PSMD12/CD36/HLA-G/PSMA4/FCGR1A/TLR6/UBA52/SEC61A1/HLA-E/HLA-C/PSMD14/PSMA3/PSMA1/CALR/BTK/SEC61G/PSMD8/PSMB3/HLA-F/PSMD9/MRC2/PSMC4/PSMD2/PSMC1/PSMC3/PSMB8/ITGAV/PSMB5/PSME1/NCF1/PSMC6/PSMB6/TAP2/TLR1/TAP1/PSMB9/TLR2/CYBB/CTSL/CD14/LY96/S100A9/MRC1/S100A8/NCF2
REACTOME_MITOTIC_METAPHASE_AND_ANAPHASE	REACTOME_MITOTIC_METAPHASE_AND_ANAPHASE	REACTOME_MITOTIC_METAPHASE_AND_ANAPHASE	217	-0.485493	-1.99887	1.32051e-09	1.35557e-07	1.08037e-07	4067	tags=53%, list=25%, signal=40%	NUP93/PSMD3/PDS5A/TUBB4B/CKAP5/NUP37/KPNB1/NUP43/PPP2CA/AHCTF1/ANAPC11/PAFAH1B1/DYNLL1/PSMA5/NUP133/ANKLE2/NUP205/PSMC5/PSMD13/UBB/PPP2R5E/CDC23/DYNC1LI1/PSMB4/PSMB2/NUP62/ANAPC10/RANGAP1/CENPI/TMPO/PSMB10/PSMD1/PSMD12/BUB1B/NUP160/NDEL1/CDK1/PSMA4/UBA52/LMNA/ERCC6L/CENPK/CENPE/BANF1/UBE2E1/NUP35/CENPH/PPP2R5C/CENPA/PSMD14/PSMA3/ZWINT/BUB3/NUP155/PSMA1/CENPL/INCENP/CENPQ/NUDC/SEC13/PSMD8/ZWILCH/T…
WP_SARS_COV_2_INNATE_IMMUNITY_EVASION_AND_CELL_SPECIFIC_IMMUNE_RESPONSE	WP_SARS_COV_2_INNATE_IMMUNITY_EVASION_AND_CELL_SPECIFIC_IMMUNE_RESPONSE	WP_SARS_COV_2_INNATE_IMMUNITY_EVASION_AND_CELL_SPECIFIC_IMMUNE_RESPONSE	64	-0.688831	-2.36554	1.39878e-09	1.38806e-07	1.10626e-07	889	tags=38%, list=6%, signal=36%	IRF7/CXCL17/IFIT2/CXCR2/LAG3/TGFB1/CXCL3/MX1/HAVCR2/CCL5/STAT1/CXCL1/CXCL13/TFAP2A/CCL2/CXCL6/CXCL9/CCL4/IL6/CXCL11/PPBP/CXCL10/CXCL5/CXCL8
REACTOME_INTEGRIN_CELL_SURFACE_INTERACTIONS	REACTOME_INTEGRIN_CELL_SURFACE_INTERACTIONS	REACTOME_INTEGRIN_CELL_SURFACE_INTERACTIONS	83	-0.634509	-2.29747	2.38865e-09	2.29388e-07	1.82819e-07	2873	tags=63%, list=18%, signal=52%	CD44/HSPG2/KDR/JAM2/ITGB7/ITGB1/BSG/ICAM2/ITGA1/ITGA7/COL13A1/THBS1/ITGA4/ICAM4/ITGA11/ITGAL/VWF/JAM3/ITGAE/ITGAV/COL8A2/COL4A2/ITGA3/COL16A1/COL4A1/PECAM1/COL5A3/FN1/VCAM1/ITGAX/COL18A1/COL7A1/COL6A1/COL6A2/COL5A1/IBSP/FBN1/COL6A3/COL8A1/ITGA5/ICAM1/COMP/COL3A1/ITGB2/COL1A2/LUM/COL5A2/COL1A1/ITGAM/TNC/COL10A1/SPP1
REACTOME_DNA_REPLICATION	REACTOME_DNA_REPLICATION	REACTOME_DNA_REPLICATION	123	-0.571304	-2.19805	3.08692e-09	2.8718e-07	2.28879e-07	3819	tags=56%, list=24%, signal=43%	CDK2/KPNA1/ANAPC11/ORC5/PSMA5/POLE3/PSMC5/PSMD13/UBB/POLD2/CDC23/RBX1/RFC1/PSMB4/PSMB2/ANAPC10/PSMB10/PSMD1/PSMD12/POLD1/PSMA4/UBA52/CCNE2/PRIM1/UBE2E1/GINS4/MCM7/DBF4/PSMD14/PSMA3/KPNA6/PSMA1/RFC5/PRIM2/SKP2/RFC4/PSMD8/MCM3/PSMB3/RFC2/PSMD9/CDT1/PSMC4/RPA1/PSMD2/MCM6/GINS3/PSMC1/RPA2/PSMC3/PSMB8/MCM2/CCNA2/MCM5/PSMB5/MCM4/FEN1/CDC45/ORC1/PSME1/CDC27/POLE2/PSMC6/MCM10/PSMB6/CDC6/CDC7/PSMB9/UBE2S
REACTOME_SYNTHESIS_OF_DNA	REACTOME_SYNTHESIS_OF_DNA	REACTOME_SYNTHESIS_OF_DNA	116	-0.575461	-2.19905	3.25723e-09	2.93842e-07	2.34188e-07	3615	tags=53%, list=22%, signal=42%	ORC5/PSMA5/POLE3/PSMC5/PSMD13/UBB/POLD2/CDC23/RBX1/RFC1/PSMB4/PSMB2/ANAPC10/PSMB10/PSMD1/PSMD12/POLD1/PSMA4/UBA52/CCNE2/PRIM1/UBE2E1/GINS4/MCM7/PSMD14/PSMA3/PSMA1/RFC5/PRIM2/SKP2/RFC4/PSMD8/MCM3/PSMB3/RFC2/PSMD9/CDT1/PSMC4/RPA1/PSMD2/MCM6/GINS3/PSMC1/RPA2/PSMC3/PSMB8/MCM2/CCNA2/MCM5/PSMB5/MCM4/FEN1/CDC45/ORC1/PSME1/CDC27/POLE2/PSMC6/PSMB6/CDC6/PSMB9/UBE2S
REACTOME_CLASS_A_1_RHODOPSIN_LIKE_RECEPTORS	REACTOME_CLASS_A_1_RHODOPSIN_LIKE_RECEPTORS	REACTOME_CLASS_A_1_RHODOPSIN_LIKE_RECEPTORS	306	-0.429138	-1.82607	5.50101e-09	4.81662e-07	3.83879e-07	1693	tags=19%, list=10%, signal=17%	NMB/NPB/CCR2/GAL/GRP/CXCR1/CX3CL1/P2RY13/APLNR/ACKR1/GPR183/ACKR4/CMKLR1/F2R/EDNRA/AVPR1A/HTR2B/GPR68/CCK/P2RY6/CCR5/PTGER2/SUCNR1/CCL7/CCL21/GPR65/FFAR2/CXCR2/NTSR1/PTAFR/CCL13/KISS1R/FPR2/CXCL3/PROK2/C3/CXCL16/CCL5/C3AR1/CCR1/CXCL1/FPR3/FPR1/CXCL13/CCL2/C5AR1/CXCR4/ANXA1/CXCL6/CXCL9/CCL4/NMU/HCAR3/CXCL11/PPBP/CXCL10/CXCL5/CXCL8
REACTOME_M_PHASE	REACTOME_M_PHASE	REACTOME_M_PHASE	332	-0.417132	-1.78251	9.66838e-09	8.22365e-07	6.55414e-07	4067	tags=47%, list=25%, signal=36%	NUP93/PSMD3/PDS5A/TUBB4B/CKAP5/LPIN1/NUP37/SMC4/SMC2/MCPH1/KPNB1/NUP43/PPP2CA/AHCTF1/LPIN2/HAUS3/ANAPC11/PAFAH1B1/DYNLL1/NCAPG2/CETN2/NEK7/PSMA5/NUP133/ANKLE2/NUP205/PSMC5/PSMD13/UBB/PPP2R5E/ODF2/CDC23/HAUS6/DYNC1LI1/ACTR1A/NCAPD3/PSMB4/PSMB2/NUP62/ANAPC10/RANGAP1/CENPI/TMPO/PSMB10/PSMD1/PSMD12/BUB1B/NUP160/NDEL1/SDCCAG8/CDK1/PSMA4/USO1/NUP50/HAUS8/UBA52/LMNA/ERCC6L/CENPK/CENPE/BANF1/UBE2E1/BLZF1…
REACTOME_ASSEMBLY_OF_COLLAGEN_FIBRILS_AND_OTHER_MULTIMERIC_STRUCTURES	REACTOME_ASSEMBLY_OF_COLLAGEN_FIBRILS_AND_OTHER_MULTIMERIC_STRUCTURES	REACTOME_ASSEMBLY_OF_COLLAGEN_FIBRILS_AND_OTHER_MULTIMERIC_STRUCTURES	61	-0.671333	-2.29593	1.52181e-08	1.25846e-06	1.00297e-06	859	tags=49%, list=5%, signal=47%	COL8A2/COL4A2/LOXL2/COL4A1/CTSB/MMP7/COL5A3/COL18A1/MMP13/COL7A1/COL6A1/PXDN/COL6A2/COL5A1/COL12A1/PCOLCE/COL6A3/COL8A1/COL3A1/COL1A2/CTSL/COL5A2/COL1A1/COL15A1/MMP9/LOXL1/COL11A1/LOX/MMP3/COL10A1
KEGG_ECM_RECEPTOR_INTERACTION	KEGG_ECM_RECEPTOR_INTERACTION	KEGG_ECM_RECEPTOR_INTERACTION	81	-0.631911	-2.27743	1.6125e-08	1.29741e-06	1.03402e-06	2645	tags=48%, list=16%, signal=40%	ITGB7/SV2A/ITGB1/LAMA4/ITGA1/ITGA7/LAMC1/THBS1/ITGA4/ITGA11/HMMR/LAMC2/VWF/ITGAV/COL4A2/ITGA3/LAMA5/THBS4/LAMA2/COL4A1/COL5A3/FN1/SDC2/LAMB2/COL6A1/COL6A2/COL5A1/IBSP/COL6A3/ITGA5/COMP/COL3A1/COL1A2/COL5A2/COL1A1/COL11A1/TNC/THBS2/SPP1
REACTOME_APC_C_MEDIATED_DEGRADATION_OF_CELL_CYCLE_PROTEINS	REACTOME_APC_C_MEDIATED_DEGRADATION_OF_CELL_CYCLE_PROTEINS	REACTOME_APC_C_MEDIATED_DEGRADATION_OF_CELL_CYCLE_PROTEINS	83	-0.61651	-2.2323	1.93937e-08	1.51934e-06	1.2109e-06	3819	tags=57%, list=24%, signal=43%	CDK2/ANAPC11/PSMA5/PSMC5/PSMD13/UBB/CDC23/PSMB4/PSMB2/ANAPC10/PSMB10/PSMD1/PSMD12/BUB1B/CDK1/PSMA4/UBA52/UBE2E1/PSMD14/PSMA3/BUB3/PSMA1/SKP2/PSMD8/PSMB3/PSMD9/PSMC4/FBXO5/PSMD2/PSMC1/PSMC3/AURKB/PSMB8/CCNA2/MAD2L1/PSMB5/PTTG1/PLK1/NEK2/PSME1/CDC27/PSMC6/PSMB6/CCNB1/PSMB9/CDC20/UBE2S
KEGG_GRAFT_VERSUS_HOST_DISEASE	KEGG_GRAFT_VERSUS_HOST_DISEASE	KEGG_GRAFT_VERSUS_HOST_DISEASE	32	-0.782221	-2.3176	2.04686e-08	1.56244e-06	1.24524e-06	3034	tags=78%, list=19%, signal=64%	HLA-G/IL1A/HLA-E/HLA-C/CD28/FASLG/TNF/HLA-F/GZMB/CD80/HLA-DOA/KLRD1/FAS/IFNG/HLA-DPB1/HLA-DQA1/HLA-DQB1/HLA-DMB/CD86/PRF1/HLA-DPA1/HLA-DMA/HLA-DRA/IL1B/IL6
REACTOME_RESPONSE_TO_ELEVATED_PLATELET_CYTOSOLIC_CA2	REACTOME_RESPONSE_TO_ELEVATED_PLATELET_CYTOSOLIC_CA2	REACTOME_RESPONSE_TO_ELEVATED_PLATELET_CYTOSOLIC_CA2	124	-0.551347	-2.11962	2.5063e-08	1.86532e-06	1.48663e-06	2226	tags=35%, list=14%, signal=30%	VCL/F13A1/ACTN1/THBS1/FERMT3/TGFB2/TUBA4A/ECM1/SOD1/LHFPL2/HSPA5/TMX3/VWF/CTSW/SERPINA3/QSOX1/ALDOA/TIMP3/RARRES2/PCDH7/MANF/SERPINA1/PFN1/PECAM1/FN1/TGFB3/CALU/ANXA5/F5/TGFB1/VEGFC/ISLR/FLNA/CFD/RAB27B/TIMP1/SPARC/SERPING1/PLEK/SERPINE1/SRGN/CD109/PPBP
KEGG_HEMATOPOIETIC_CELL_LINEAGE	KEGG_HEMATOPOIETIC_CELL_LINEAGE	KEGG_HEMATOPOIETIC_CELL_LINEAGE	82	-0.613482	-2.21947	2.69355e-08	1.95578e-06	1.55873e-06	2328	tags=52%, list=14%, signal=45%	CD34/EPOR/ITGB3/CSF3/CD33/CD36/IL1A/FCGR1A/CD44/CD3G/ITGA1/IL3RA/CR1/CD3E/IL9R/ITGA4/MME/TNF/CD4/CD38/CD3D/IL7R/ITGA3/KITLG/CSF2/CD37/CSF2RA/CD7/CD2/CD8A/IL1R1/IL2RA/CSF1R/CSF3R/IL11/CD55/ITGA5/CD14/HLA-DRA/IL1B/ITGAM/IL1R2/IL6
KEGG_ANTIGEN_PROCESSING_AND_PRESENTATION	KEGG_ANTIGEN_PROCESSING_AND_PRESENTATION	KEGG_ANTIGEN_PROCESSING_AND_PRESENTATION	67	-0.655745	-2.27079	2.77051e-08	1.96376e-06	1.5651e-06	3609	tags=49%, list=22%, signal=38%	HLA-DOB/NFYB/KIR2DL4/HLA-B/HSP90AB1/HLA-G/HLA-E/HLA-C/CALR/HSPA4/HLA-F/CD4/HSPA5/HLA-DOA/HSPA2/PSME1/KLRD1/HSP90AA1/CD8A/TAP2/CTSB/LGMN/HLA-DPB1/HSPA6/HLA-DQA1/HLA-DQB1/CD74/TAP1/HLA-DMB/HLA-DPA1/HLA-DMA/CTSL/HLA-DRA
WP_IL_24_SIGNALING_PATHWAY	WP_IL_24_SIGNALING_PATHWAY	WP_IL_24_SIGNALING_PATHWAY	220	-0.460327	-1.9004	3.23226e-08	2.23777e-06	1.78348e-06	2509	tags=33%, list=16%, signal=28%	PARK7/BSG/PDGFB/EEF1E1/RPS6KB1/NOS2/FASLG/TNFRSF1B/NAA10/FZD1/CCND1/CD83/MME/TNF/AP3S1/MICA/PSMD9/SOD1/AKT1/PIK3CD/GZMB/HSPA5/CD80/CD82/PARP1/KRT13/HSPB1/KRT14/KRT5/EIF4EBP1/HSP90B1/EIF2S1/BIRC5/MEIS1/HSP90AA1/CDKN2A/CD40/CASP4/IRF1/FAS/MMP14/PECAM1/MMP2/CD200/CTSB/IFNG/SOD2/CCNB1/VCAM1/PTPRC/BCL6/S100A2/EIF5A/ANXA5/TGFB1/VEGFC/COL6A2/STAT1/CD86/PRF1/MICB/ICAM1/PMAIP1/CD14/MMP9/IL24/TWIST1/ITGAM/…
REACTOME_REGULATION_OF_INSULIN_LIKE_GROWTH_FACTOR_IGF_TRANSPORT_AND_UPTAKE_BY_INSULIN_LIKE_GROWTH_FACTOR_BINDING_PROTEINS_IGFBPS	REACTOME_REGULATION_OF_INSULIN_LIKE_GROWTH_FACTOR_IGF_TRANSPORT_AND_UPTAKE_BY_INSULIN_LIKE_GROWTH_FACTOR_BINDING_PROTEINS_IGFBPS	REACTOME_REGULATION_OF_INSULIN_LIKE_GROWTH_FACTOR_IGF_TRANSPORT_AND_UPTAKE_BY_INSULIN_LIKE_GROWTH_FACTOR_BINDING_PROTEINS_IGFBPS	119	-0.553978	-2.11926	4.85488e-08	3.28477e-06	2.61792e-06	2639	tags=41%, list=16%, signal=35%	VWA1/CHRDL1/VGF/EVA1A/MATN3/PDIA6/P4HB/LAMC1/CDH2/WFS1/FAM20C/APOA2/IGFBP4/BMP4/SCG2/QSOX1/HSP90B1/PAPPA/MXRA8/FSTL1/IGFBP7/SERPINA1/IGFBP3/SPARCL1/MFGE8/IGFBP5/MMP2/FAM20A/FN1/SDC2/LAMB2/IGFBP6/PCSK9/CALU/F5/C3/VCAN/APOL1/FBN1/GZMH/TIMP1/FSTL3/LGALS1/TNC/MSLN/APOE/IL6/SPP1/MMP1
WP_T_CELL_MODULATION_IN_PANCREATIC_CANCER	WP_T_CELL_MODULATION_IN_PANCREATIC_CANCER	WP_T_CELL_MODULATION_IN_PANCREATIC_CANCER	44	-0.711611	-2.27416	5.57277e-08	3.6867e-06	2.93825e-06	2295	tags=59%, list=14%, signal=51%	FASLG/VTCN1/TGFB2/TNFRSF4/CD80/ICOS/TIGIT/CTLA4/TNFRSF9/ENTPD1/CD40/FAS/PDCD1LG2/TGFB3/TGFB1/VEGFC/NT5E/TNFSF4/HAVCR2/CD274/CD86/LGALS1/IDO1/TNFSF9/IL6/FAP
KEGG_LEISHMANIA_INFECTION	KEGG_LEISHMANIA_INFECTION	KEGG_LEISHMANIA_INFECTION	65	-0.655387	-2.26195	6.36318e-08	4.11808e-06	3.28206e-06	2159	tags=55%, list=13%, signal=48%	IL1A/IL10/FCGR1A/MAPK12/PRKCB/ITGB1/NOS2/CR1/FOS/ITGA4/TGFB2/MAPK11/TNF/HLA-DOA/NCF1/JAK2/IFNG/TGFB3/HLA-DPB1/HLA-DQA1/HLA-DQB1/TGFB1/C3/HLA-DMB/TLR2/STAT1/HLA-DPA1/HLA-DMA/ITGB2/FCGR2A/HLA-DRA/IL1B/ITGAM/FCGR3B/NCF2/PTGS2
KEGG_TOLL_LIKE_RECEPTOR_SIGNALING_PATHWAY	KEGG_TOLL_LIKE_RECEPTOR_SIGNALING_PATHWAY	KEGG_TOLL_LIKE_RECEPTOR_SIGNALING_PATHWAY	97	-0.583453	-2.1712	7.59056e-08	4.80789e-06	3.83183e-06	2500	tags=34%, list=15%, signal=29%	TRAF3/TLR5/PIK3R3/PIK3CG/MAP2K4/FOS/MAPK11/TNF/AKT1/PIK3CD/CD80/AKT3/PIK3R5/MAP3K8/CD40/IRF7/TLR1/TLR8/CTSK/TLR2/CCL5/STAT1/CD86/CD14/LY96/IL1B/CXCL9/CCL4/IL6/CXCL11/CXCL10/CXCL8/SPP1
REACTOME_COLLAGEN_BIOSYNTHESIS_AND_MODIFYING_ENZYMES	REACTOME_COLLAGEN_BIOSYNTHESIS_AND_MODIFYING_ENZYMES	REACTOME_COLLAGEN_BIOSYNTHESIS_AND_MODIFYING_ENZYMES	63	-0.65838	-2.26575	1.0085e-07	6.2548e-06	4.985e-06	1859	tags=48%, list=12%, signal=42%	COLGALT1/P4HA3/PPIB/COL8A2/COL4A2/PCOLCE2/P4HA1/COLGALT2/COL16A1/PLOD1/COL4A1/SERPINH1/COL5A3/COL18A1/COL7A1/COL6A1/COL6A2/COL5A1/COL12A1/PCOLCE/COL6A3/COL8A1/COL3A1/COL1A2/COL5A2/COL1A1/COL15A1/ADAMTS2/COL11A1/COL10A1
REACTOME_DNA_REPLICATION_PRE_INITIATION	REACTOME_DNA_REPLICATION_PRE_INITIATION	REACTOME_DNA_REPLICATION_PRE_INITIATION	96	-0.569459	-2.1123	1.22931e-07	7.46866e-06	5.95243e-06	3907	tags=59%, list=24%, signal=45%	KPNB1/CDK2/KPNA1/ANAPC11/ORC5/PSMA5/POLE3/PSMC5/PSMD13/UBB/CDC23/PSMB4/PSMB2/ANAPC10/PSMB10/PSMD1/PSMD12/PSMA4/UBA52/PRIM1/UBE2E1/MCM7/DBF4/PSMD14/PSMA3/KPNA6/PSMA1/PRIM2/PSMD8/MCM3/PSMB3/PSMD9/CDT1/PSMC4/RPA1/PSMD2/MCM6/PSMC1/RPA2/PSMC3/PSMB8/MCM2/MCM5/PSMB5/MCM4/CDC45/ORC1/PSME1/CDC27/POLE2/PSMC6/MCM10/PSMB6/CDC6/CDC7/PSMB9/UBE2S
WP_CELL_INTERACTIONS_OF_THE_PANCREATIC_CANCER_MICROENVIRONMENT	WP_CELL_INTERACTIONS_OF_THE_PANCREATIC_CANCER_MICROENVIRONMENT	WP_CELL_INTERACTIONS_OF_THE_PANCREATIC_CANCER_MICROENVIRONMENT	25	-0.811645	-2.2461	1.42694e-07	8.38618e-06	6.68368e-06	1745	tags=76%, list=11%, signal=68%	CD80/CCR2/CTLA4/CSF2/CSF2RA/IFITM2/FAS/BAG3/CCR5/CSF1R/LAG3/TGFB1/NRP1/CCL5/CD86/HLA-DRA/CCL2/CXCR4/CXCL10
REACTOME_THE_ROLE_OF_GTSE1_IN_G2_M_PROGRESSION_AFTER_G2_CHECKPOINT	REACTOME_THE_ROLE_OF_GTSE1_IN_G2_M_PROGRESSION_AFTER_G2_CHECKPOINT	REACTOME_THE_ROLE_OF_GTSE1_IN_G2_M_PROGRESSION_AFTER_G2_CHECKPOINT	70	-0.62825	-2.21193	1.4783e-07	8.38618e-06	6.68368e-06	3568	tags=57%, list=22%, signal=45%	PSMA5/PSMC5/PSMD13/UBB/HSP90AB1/PSMB4/PSMB2/PSMB10/PSMD1/PSMD12/CDK1/PSMA4/UBA52/PSMD14/PSMA3/PSMA1/PSMD8/TUBB3/PSMB3/TUBA4A/PSMD9/PSMC4/PSMD2/PSMC1/TUBA1C/PSMC3/PSMB8/PSMB5/PLK1/TUBB2B/PSME1/TUBA1B/PSMC6/HSP90AA1/TUBA1A/PSMB6/CCNB1/TUBB2A/PSMB9/TUBB6
WP_EXTRAFOLLICULAR_AND_FOLLICULAR_B_CELL_ACTIVATION_BY_SARS_COV_2	WP_EXTRAFOLLICULAR_AND_FOLLICULAR_B_CELL_ACTIVATION_BY_SARS_COV_2	WP_EXTRAFOLLICULAR_AND_FOLLICULAR_B_CELL_ACTIVATION_BY_SARS_COV_2	70	-0.628541	-2.21296	1.4783e-07	8.38618e-06	6.68368e-06	2159	tags=41%, list=13%, signal=36%	CR1/TNF/MAF/IRF8/SH2D1A/CD80/ICOS/CD82/TMSB10/ETS1/GPR183/ZEB2/CD40/MFGE8/IFNG/CCL21/PTPRC/IFIT2/BCL6/ITGAX/SELL/C3/CD69/ITGB2/TNFSF13B/ISG15/CXCL13/CXCR4/IL6
WP_TOLL_LIKE_RECEPTOR_SIGNALING_PATHWAY	WP_TOLL_LIKE_RECEPTOR_SIGNALING_PATHWAY	WP_TOLL_LIKE_RECEPTOR_SIGNALING_PATHWAY	98	-0.568956	-2.1196	1.51752e-07	8.38618e-06	6.68368e-06	2500	tags=33%, list=15%, signal=28%	TRAF3/TLR5/PIK3R3/PIK3CG/MAP2K4/FOS/MAPK11/TNF/AKT1/PIK3CD/CD80/AKT3/PIK3R5/MAP3K8/CD40/IRF7/TLR1/TLR8/TLR2/CCL5/STAT1/CD86/CD14/LY96/IL1B/CXCL9/CCL4/IL6/CXCL11/CXCL10/CXCL8/SPP1
WP_MIR_509_3P_ALTERATION_OF_YAP1_ECM_AXIS	WP_MIR_509_3P_ALTERATION_OF_YAP1_ECM_AXIS	WP_MIR_509_3P_ALTERATION_OF_YAP1_ECM_AXIS	17	-0.867902	-2.23997	1.52117e-07	8.38618e-06	6.68368e-06	1299	tags=71%, list=8%, signal=65%	TEAD4/EDNRA/PBX3/GPC6/FN1/COL5A1/SNAI2/SPARC/COL3A1/COL1A1/TWIST1/THBS2
REACTOME_ORC1_REMOVAL_FROM_CHROMATIN	REACTOME_ORC1_REMOVAL_FROM_CHROMATIN	REACTOME_ORC1_REMOVAL_FROM_CHROMATIN	67	-0.634945	-2.19876	1.7859e-07	9.66658e-06	7.70414e-06	3615	tags=60%, list=22%, signal=47%	ORC5/PSMA5/PSMC5/PSMD13/UBB/RBX1/PSMB4/PSMB2/PSMB10/PSMD1/PSMD12/PSMA4/UBA52/MCM7/PSMD14/PSMA3/PSMA1/SKP2/PSMD8/MCM3/PSMB3/PSMD9/CDT1/PSMC4/PSMD2/MCM6/PSMC1/PSMC3/PSMB8/MCM2/CCNA2/MCM5/PSMB5/MCM4/ORC1/PSME1/PSMC6/PSMB6/CDC6/PSMB9
WP_SPINAL_CORD_INJURY	WP_SPINAL_CORD_INJURY	WP_SPINAL_CORD_INJURY	113	-0.551703	-2.10519	1.83352e-07	9.74713e-06	7.76834e-06	888	tags=23%, list=5%, signal=22%	SLIT2/COL4A1/IL1R1/IFNG/MIF/VIM/NOX4/GJA1/TGFB1/VCAN/CHST11/ICAM1/CXCL1/FCGR2A/MMP9/TNFSF13B/IL1B/C1QB/CCL2/ANXA1/MMP12/IL6/PLA2G2A/PTGS2/CXCL10/CXCL8
REACTOME_SWITCHING_OF_ORIGINS_TO_A_POST_REPLICATIVE_STATE	REACTOME_SWITCHING_OF_ORIGINS_TO_A_POST_REPLICATIVE_STATE	REACTOME_SWITCHING_OF_ORIGINS_TO_A_POST_REPLICATIVE_STATE	87	-0.583536	-2.12669	1.91777e-07	1.00161e-05	7.98273e-06	3819	tags=55%, list=24%, signal=42%	CDK2/ANAPC11/ORC5/PSMA5/PSMC5/PSMD13/UBB/CDC23/RBX1/PSMB4/PSMB2/ANAPC10/PSMB10/PSMD1/PSMD12/PSMA4/UBA52/CCNE2/UBE2E1/MCM7/PSMD14/PSMA3/PSMA1/SKP2/PSMD8/MCM3/PSMB3/PSMD9/CDT1/PSMC4/PSMD2/MCM6/PSMC1/PSMC3/PSMB8/MCM2/CCNA2/MCM5/PSMB5/MCM4/ORC1/PSME1/CDC27/PSMC6/PSMB6/CDC6/PSMB9/UBE2S
WP_PHOTODYNAMIC_THERAPY_INDUCED_NF_KB_SURVIVAL_SIGNALING	WP_PHOTODYNAMIC_THERAPY_INDUCED_NF_KB_SURVIVAL_SIGNALING	WP_PHOTODYNAMIC_THERAPY_INDUCED_NF_KB_SURVIVAL_SIGNALING	35	-0.742673	-2.23178	1.96062e-07	1.00634e-05	8.02039e-06	2291	tags=57%, list=14%, signal=49%	RELB/CCND1/TNF/CXCL2/NFKB2/BIRC5/CSF2/MMP2/BIRC3/VCAM1/SELE/ICAM1/MMP9/IL1B/IL6/MMP3/PTGS2/BCL2A1/CXCL8/MMP1
REACTOME_G_ALPHA_I_SIGNALLING_EVENTS	REACTOME_G_ALPHA_I_SIGNALLING_EVENTS	REACTOME_G_ALPHA_I_SIGNALLING_EVENTS	294	-0.41418	-1.76098	2.30821e-07	1.16467e-05	9.28228e-06	1716	tags=19%, list=11%, signal=17%	GNG10/RGS14/NPB/CCR2/GAL/CXCR1/CX3CL1/P2RY13/GPSM1/GNAI3/APLNR/GPR183/GNB5/KPNA2/GNG11/RGS4/RGS1/RGS19/GNAI2/CCR5/RGS10/SUCNR1/CCL21/GNB4/RGS16/CXCR2/ADCY7/CCL13/PDE4B/FPR2/CXCL3/C3/CXCL16/PRKAR2B/CCL5/C3AR1/CCR1/CXCL1/FPR3/GNA15/FPR1/CXCL13/C5AR1/CXCR4/ANXA1/CXCL6/CXCL9/CCL4/NMU/PLA2G4A/HCAR3/CXCL11/PPBP/CXCL10/CXCL5/CXCL8
REACTOME_INTERLEUKIN_1_FAMILY_SIGNALING	REACTOME_INTERLEUKIN_1_FAMILY_SIGNALING	REACTOME_INTERLEUKIN_1_FAMILY_SIGNALING	145	-0.497776	-1.94851	2.95143e-07	1.4644e-05	1.16711e-05	3442	tags=40%, list=21%, signal=32%	PSMC5/PSMD13/UBB/RBX1/NFKBIA/PSMB4/CHUK/PSMB2/MAP2K1/PSMB10/PSMD1/PSMD12/IL1A/PSMA4/UBA52/IRAK3/PELI3/PSMD14/PSMA3/PSMA1/IL18BP/IL1RAP/MAP2K4/PSMD8/PSMB3/PTPN12/NKIRAS1/PTPN2/PSMD9/PSMC4/PSMD2/PSMC1/PSMC3/S100B/PTPN13/PSMB8/NFKB2/PTPN7/PSMB5/IL18/PSME1/RIPK2/USP14/TIFA/NLRC5/PSMC6/MAP3K8/PSMB6/IL1R1/PTPN14/S100A12/PSMB9/ALOX5/USP18/IKBIP/IL1B/IL1R2/IL1RN
WP_COMPLEMENT_ACTIVATION	WP_COMPLEMENT_ACTIVATION	WP_COMPLEMENT_ACTIVATION	20	-0.834859	-2.2056	3.26974e-07	1.59574e-05	1.27179e-05	686	tags=40%, list=4%, signal=38%	C1R/C1S/C3/CD55/CFD/C1QA/C1QC/C1QB
KEGG_ALLOGRAFT_REJECTION	KEGG_ALLOGRAFT_REJECTION	KEGG_ALLOGRAFT_REJECTION	32	-0.750073	-2.22235	3.43626e-07	1.64996e-05	1.315e-05	3034	tags=72%, list=19%, signal=58%	HLA-G/IL10/HLA-E/HLA-C/CD28/FASLG/TNF/HLA-F/GZMB/CD80/HLA-DOA/CD40/FAS/IFNG/HLA-DPB1/HLA-DQA1/HLA-DQB1/HLA-DMB/CD86/PRF1/HLA-DPA1/HLA-DMA/HLA-DRA
PID_FRA_PATHWAY	PID_FRA_PATHWAY	PID_FRA_PATHWAY	36	-0.730102	-2.21997	4.02916e-07	1.90394e-05	1.51741e-05	1488	tags=53%, list=9%, signal=48%	CCNA2/HMOX1/LIF/CDKN2A/NFATC1/MMP2/MGP/THBD/GJA1/DCN/PLAUR/COL1A2/FOSL1/MMP9/PLAU/CCL2/IL6/CXCL8/MMP1
REACTOME_MITOTIC_G1_PHASE_AND_G1_S_TRANSITION	REACTOME_MITOTIC_G1_PHASE_AND_G1_S_TRANSITION	REACTOME_MITOTIC_G1_PHASE_AND_G1_S_TRANSITION	145	-0.491659	-1.92456	4.41249e-07	2.0525e-05	1.63582e-05	3464	tags=50%, list=21%, signal=39%	POLE3/PSMC5/PSMD13/UBB/LIN9/PSMB4/PSMB2/RBBP4/MAX/PSMB10/PSMD1/PSMD12/CDK1/PSMA4/E2F6/UBA52/CCNE2/PRIM1/CABLES1/MCM7/CDKN2C/DBF4/PSMD14/PSMA3/PSMA1/PRIM2/SKP2/PSMD8/CCND1/MCM3/PSMB3/LIN52/DHFR/PSMD9/CDT1/PSMC4/AKT1/FBXO5/CDKN1C/RPA1/PSMD2/MCM6/PSMC1/RRM2/RPA2/PSMC3/TFDP1/CKS1B/PSMB8/MCM2/CCNA2/AKT3/MCM5/PSMB5/MCM4/CDC45/ORC1/PSME1/POLE2/TK1/MNAT1/PSMC6/CDKN2A/MCM10/JAK2/PSMB6/CDC6/CCNB1/LYN/CDC7/…
REACTOME_SCF_BETA_TRCP_MEDIATED_DEGRADATION_OF_EMI1	REACTOME_SCF_BETA_TRCP_MEDIATED_DEGRADATION_OF_EMI1	REACTOME_SCF_BETA_TRCP_MEDIATED_DEGRADATION_OF_EMI1	51	-0.671993	-2.23488	4.63951e-07	2.1249e-05	1.69351e-05	3568	tags=57%, list=22%, signal=44%	PSMA5/PSMC5/PSMD13/UBB/PSMB4/PSMB2/PSMB10/PSMD1/PSMD12/PSMA4/UBA52/PSMD14/PSMA3/PSMA1/PSMD8/PSMB3/PSMD9/PSMC4/FBXO5/PSMD2/PSMC1/PSMC3/PSMB8/PSMB5/PSME1/PSMC6/PSMB6/PSMB9/CDC20
REACTOME_DECTIN_1_MEDIATED_NONCANONICAL_NF_KB_SIGNALING	REACTOME_DECTIN_1_MEDIATED_NONCANONICAL_NF_KB_SIGNALING	REACTOME_DECTIN_1_MEDIATED_NONCANONICAL_NF_KB_SIGNALING	58	-0.651118	-2.20419	4.73355e-07	2.13512e-05	1.70166e-05	3568	tags=55%, list=22%, signal=43%	PSMA5/CCL22/PSMC5/PSMD13/UBB/PSMB4/CHUK/PSMB2/PSMB10/PSMD1/PSMD12/PSMA4/UBA52/PSMD14/PSMA3/PSMA1/RELB/PSMD8/PSMB3/PSMD9/PSMC4/PSMD2/PSMC1/PSMC3/PSMB8/NFKB2/PSMB5/PSME1/UBE2M/PSMC6/PSMB6/PSMB9
PID_SYNDECAN_1_PATHWAY	PID_SYNDECAN_1_PATHWAY	PID_SYNDECAN_1_PATHWAY	46	-0.678807	-2.18779	4.87474e-07	2.16599e-05	1.72626e-05	1601	tags=54%, list=10%, signal=49%	PPIB/COL8A2/LAMA5/COL16A1/COL4A1/MMP7/HPSE/COL7A1/COL6A1/TGFB1/COL6A2/COL5A1/COL12A1/CCL5/COL6A3/COL8A1/COL3A1/COL1A2/COL5A2/COL1A1/COL15A1/MMP9/COL11A1/COL10A1/MMP1
REACTOME_CROSS_PRESENTATION_OF_SOLUBLE_EXOGENOUS_ANTIGENS_ENDOSOMES	REACTOME_CROSS_PRESENTATION_OF_SOLUBLE_EXOGENOUS_ANTIGENS_ENDOSOMES	REACTOME_CROSS_PRESENTATION_OF_SOLUBLE_EXOGENOUS_ANTIGENS_ENDOSOMES	45	-0.687653	-2.21055	5.45352e-07	2.38752e-05	1.90282e-05	3568	tags=62%, list=22%, signal=49%	PSMA5/PSMC5/PSMD13/PSMB4/PSMB2/PSMB10/PSMD1/PSMD12/PSMA4/FCGR1A/PSMD14/PSMA3/PSMA1/PSMD8/PSMB3/PSMD9/MRC2/PSMC4/PSMD2/PSMC1/PSMC3/PSMB8/PSMB5/PSME1/PSMC6/PSMB6/PSMB9/MRC1
PID_IL12_2PATHWAY	PID_IL12_2PATHWAY	PID_IL12_2PATHWAY	60	-0.64869	-2.21288	6.15907e-07	2.62523e-05	2.09228e-05	2918	tags=58%, list=18%, signal=48%	PPP3CA/STAT4/CD3G/IL12RB1/IL12RB2/NOS2/FASLG/RELB/PPP3R1/FOS/CD3E/GADD45B/CD4/CD3D/GZMB/NFKB2/CD247/HLX/IL18/RIPK2/EOMES/SOCS1/JAK2/CD8A/IL1R1/CCR5/IL2RA/IFNG/IL2RB/STAT1/GZMA/LCK/HLA-DRA/IL1B/CCL4
WP_COMPLEMENT_AND_COAGULATION_CASCADES	WP_COMPLEMENT_AND_COAGULATION_CASCADES	WP_COMPLEMENT_AND_COAGULATION_CASCADES	57	-0.651977	-2.20503	6.17286e-07	2.62523e-05	2.09228e-05	1715	tags=44%, list=11%, signal=39%	F12/VWF/CFI/F2R/SERPINA1/LMAN1/F3/THBD/C1R/C1S/F5/CFH/TFPI/C3/CD55/PLAUR/CFD/C3AR1/C1QA/C1QC/SERPING1/SERPINE1/PLAU/C1QB/C5AR1
REACTOME_INTERLEUKIN_1_SIGNALING	REACTOME_INTERLEUKIN_1_SIGNALING	REACTOME_INTERLEUKIN_1_SIGNALING	108	-0.53178	-2.00818	7.04867e-07	2.95548e-05	2.35548e-05	3442	tags=46%, list=21%, signal=37%	PSMC5/PSMD13/UBB/RBX1/NFKBIA/PSMB4/CHUK/PSMB2/MAP2K1/PSMB10/PSMD1/PSMD12/IL1A/PSMA4/UBA52/IRAK3/PELI3/PSMD14/PSMA3/PSMA1/IL1RAP/MAP2K4/PSMD8/PSMB3/NKIRAS1/PSMD9/PSMC4/PSMD2/PSMC1/PSMC3/S100B/PSMB8/NFKB2/PSMB5/PSME1/RIPK2/USP14/TIFA/NLRC5/PSMC6/MAP3K8/PSMB6/IL1R1/S100A12/PSMB9/USP18/IKBIP/IL1B/IL1R2/IL1RN
WP_UROTENSIN_II_MEDIATED_SIGNALING_PATHWAY	WP_UROTENSIN_II_MEDIATED_SIGNALING_PATHWAY	WP_UROTENSIN_II_MEDIATED_SIGNALING_PATHWAY	69	-0.608175	-2.13788	7.32051e-07	3.02683e-05	2.41234e-05	2380	tags=36%, list=15%, signal=31%	ACTA2/SMAD2/UTS2/TNF/AKT1/HSPA2/HMOX1/NCF1/JAK2/MMP2/FN1/VCAM1/PLN/NOX4/TGFB1/ALOX5/CYBB/ICAM1/COL3A1/COL1A1/MMP9/IL1B/IL6/NCF2/FSCN1
REACTOME_BIOLOGICAL_OXIDATIONS	REACTOME_BIOLOGICAL_OXIDATIONS	REACTOME_BIOLOGICAL_OXIDATIONS	185	0.489331	1.85987	9.35917e-07	3.81675e-05	3.0419e-05	1539	tags=23%, list=10%, signal=21%	SLC26A2/DPEP1/UGT2B17/UGT2A3/ADH1C/NAT2/SULT1B1/CYP2B6/AOC1/CYP4F2/GGT7/CYP2W1/GGT6/CYP4F12/CES3/ADH6/CYP39A1/CES2/ACSS2/SLC35D1/CYP27A1/CYP3A5/ACSS1/MAOA/UGT2B15/SULT1A1/ALDH1B1/CYP2S1/CYP4F3/ALDH2/GSS/UGP2/CYP4F11/MAT1A/CYP2D6/NR1H4/CYP2J2/SULT1A2/SULT4A1/SLC35B3/NAT1/PAPSS2
REACTOME_RHO_GTPASES_ACTIVATE_FORMINS	REACTOME_RHO_GTPASES_ACTIVATE_FORMINS	REACTOME_RHO_GTPASES_ACTIVATE_FORMINS	128	-0.510467	-1.96498	9.55842e-07	3.84533e-05	3.06468e-05	3989	tags=55%, list=25%, signal=42%	TUBB4B/CKAP5/NUP37/NUP43/PPP2CA/AHCTF1/RHOA/PAFAH1B1/DYNLL1/NUP133/PPP2R5E/SRF/DVL1/DYNC1LI1/RANGAP1/CENPI/BUB1B/NUP160/NDEL1/ERCC6L/CENPK/CENPE/DIAPH3/CENPH/PPP2R5C/CENPA/ZWINT/BUB3/ITGB1/CENPL/ACTB/INCENP/CENPQ/FMNL1/NUDC/SEC13/ZWILCH/TUBB3/SPC25/SRGAP2/CENPN/MIS12/TUBA4A/SKA2/CENPU/FMNL3/CENPM/TUBA1C/AURKB/BUB1/MAD2L1/MAD1L1/NUF2/KIF18A/EVL/CDCA8/PLK1/TUBB2B/BIRC5/TUBA1B/KIF2C/SPDL1/TUBA1A/PFN…
WP_COMPLEMENT_SYSTEM_IN_NEURONAL_DEVELOPMENT_AND_PLASTICITY	WP_COMPLEMENT_SYSTEM_IN_NEURONAL_DEVELOPMENT_AND_PLASTICITY	WP_COMPLEMENT_SYSTEM_IN_NEURONAL_DEVELOPMENT_AND_PLASTICITY	99	-0.547427	-2.04746	9.73859e-07	3.86557e-05	3.08081e-05	1557	tags=29%, list=10%, signal=27%	CX3CL1/ITGAV/CFI/C4BPB/ATP8B2/FAS/MFGE8/IFNG/C1R/TGFB3/FCN1/AXL/ITGAX/DLGAP5/C1S/CFH/TGFB1/C3/CD55/CFD/C3AR1/C1QA/COLEC12/C1QC/SERPING1/ITGB2/C1QB/ITGAM/C5AR1
KEGG_COMPLEMENT_AND_COAGULATION_CASCADES	KEGG_COMPLEMENT_AND_COAGULATION_CASCADES	KEGG_COMPLEMENT_AND_COAGULATION_CASCADES	67	-0.613104	-2.12313	9.96783e-07	3.9045e-05	3.11184e-05	1715	tags=37%, list=11%, signal=33%	F12/VWF/CFI/C4BPB/F2R/SERPINA1/F3/THBD/C1R/C1S/F5/CFH/TFPI/C3/CD55/PLAUR/CFD/C3AR1/C1QA/C1QC/SERPING1/SERPINE1/PLAU/C1QB/C5AR1
REACTOME_S_PHASE	REACTOME_S_PHASE	REACTOME_S_PHASE	157	-0.476833	-1.8834	1.01507e-06	3.92449e-05	3.12777e-05	3464	tags=54%, list=21%, signal=43%	CDK4/RAD21/PCNA/PSMD3/PDS5A/CDC25B/LIN54/CDK2/ANAPC11/ORC5/PSMA5/POLE3/PSMC5/PSMD13/UBB/POLD2/CDC23/RBX1/RFC1/LIN9/PSMB4/PSMB2/ANAPC10/RBBP4/MAX/PSMB10/PSMD1/PSMD12/POLD1/PSMA4/UBA52/CCNE2/PRIM1/CABLES1/UBE2E1/GINS4/MCM7/PSMD14/PSMA3/PSMA1/RFC5/ESCO1/PRIM2/SKP2/RFC4/PSMD8/CCND1/MCM3/PSMB3/RFC2/LIN52/CDCA5/PSMD9/CDT1/PSMC4/AKT1/RPA1/PSMD2/MCM6/ESCO2/GINS3/PSMC1/RPA2/PSMC3/TFDP1/CKS1B/PSMB8/MCM2/CC…
REACTOME_APC_C_CDH1_MEDIATED_DEGRADATION_OF_CDC20_AND_OTHER_APC_C_CDH1_TARGETED_PROTEINS_IN_LATE_MITOSIS_EARLY_G1	REACTOME_APC_C_CDH1_MEDIATED_DEGRADATION_OF_CDC20_AND_OTHER_APC_C_CDH1_TARGETED_PROTEINS_IN_LATE_MITOSIS_EARLY_G1	REACTOME_APC_C_CDH1_MEDIATED_DEGRADATION_OF_CDC20_AND_OTHER_APC_C_CDH1_TARGETED_PROTEINS_IN_LATE_MITOSIS_EARLY_G1	69	-0.603846	-2.12266	1.06825e-06	4.07714e-05	3.24943e-05	3720	tags=55%, list=23%, signal=43%	ANAPC11/PSMA5/PSMC5/PSMD13/UBB/CDC23/PSMB4/PSMB2/ANAPC10/PSMB10/PSMD1/PSMD12/PSMA4/UBA52/UBE2E1/PSMD14/PSMA3/PSMA1/SKP2/PSMD8/PSMB3/PSMD9/PSMC4/PSMD2/PSMC1/PSMC3/AURKB/PSMB8/PSMB5/PTTG1/PLK1/PSME1/CDC27/PSMC6/PSMB6/PSMB9/CDC20/UBE2S
REACTOME_GPCR_LIGAND_BINDING	REACTOME_GPCR_LIGAND_BINDING	REACTOME_GPCR_LIGAND_BINDING	423	-0.367747	-1.59997	1.23043e-06	4.63669e-05	3.69538e-05	1716	tags=17%, list=11%, signal=15%	GNG10/NMB/NPB/CCR2/GAL/GRP/CXCR1/CX3CL1/P2RY13/APLNR/WNT5A/ACKR1/GPR183/ACKR4/GNB5/CMKLR1/F2R/EDNRA/GNG11/AVPR1A/CALCRL/PTHLH/WNT2/HTR2B/GPR68/CCK/P2RY6/CCR5/ADM/FZD2/PTGER2/SUCNR1/CCL7/CCL21/GPR65/GNB4/FFAR2/CXCR2/NTSR1/PTAFR/CCL13/KISS1R/FPR2/CXCL3/PROK2/C3/CXCL16/CD55/CCL5/C3AR1/CCR1/CXCL1/FPR3/FPR1/CXCL13/CCL2/C5AR1/CXCR4/ANXA1/CXCL6/CXCL9/CCL4/NMU/HCAR3/CXCL11/PPBP/CXCL10/CXCL5/RAMP1/CXCL8
WP_FOCAL_ADHESION_PI3K_AKT_MTOR_SIGNALING_PATHWAY	WP_FOCAL_ADHESION_PI3K_AKT_MTOR_SIGNALING_PATHWAY	WP_FOCAL_ADHESION_PI3K_AKT_MTOR_SIGNALING_PATHWAY	298	-0.39944	-1.70052	1.27012e-06	4.72644e-05	3.76691e-05	2498	tags=28%, list=15%, signal=24%	ITGB1/LAMA4/PDGFB/RPS6KB1/NOS2/GNG2/ITGA7/JAK3/EFNA5/ANGPT2/PIK3CG/IL3RA/LAMC1/THBS1/ITGA4/ITGA11/AKT1/PIK3CD/TBC1D1/FGFR1/LAMC2/IL7R/ITGAL/PFKFB4/GNG10/PELO/VWF/ITGAE/ITGAV/COL4A2/AKT3/FGF2/EIF4EBP1/FGF7/PIK3R5/ITGA3/HSP90B1/HRAS/F2R/LAMA5/KITLG/GNG11/THBS4/LAMA2/HSP90AA1/PDGFRB/JAK2/DDIT4/COL4A1/EPHA2/IL2RA/PDGFC/COL5A3/PFKFB3/FN1/IL2RB/CSF1R/HIF1A/GNB4/IRS1/LAMB2/ITGAX/SLC2A1/CREB3L1/CSF3R/VEG…
REACTOME_ECM_PROTEOGLYCANS	REACTOME_ECM_PROTEOGLYCANS	REACTOME_ECM_PROTEOGLYCANS	74	-0.586221	-2.1012	1.36235e-06	5.00704e-05	3.99055e-05	1521	tags=39%, list=9%, signal=36%	ITGAV/COL4A2/LAMA5/LAMA2/COL4A1/COL5A3/FN1/TGFB3/LAMB2/ITGAX/DCN/COL6A1/TGFB1/COL6A2/COL5A1/ASPN/VCAN/IBSP/COL6A3/SPARC/COMP/COL3A1/COL1A2/LUM/COL5A2/COL1A1/SERPINE1/BGN/TNC
REACTOME_COLLAGEN_CHAIN_TRIMERIZATION	REACTOME_COLLAGEN_CHAIN_TRIMERIZATION	REACTOME_COLLAGEN_CHAIN_TRIMERIZATION	44	-0.669941	-2.14099	1.38344e-06	5.02258e-05	4.00293e-05	1411	tags=45%, list=9%, signal=42%	COL8A2/COL4A2/COL16A1/COL4A1/COL5A3/COL18A1/COL7A1/COL6A1/COL6A2/COL5A1/COL12A1/COL6A3/COL8A1/COL3A1/COL1A2/COL5A2/COL1A1/COL15A1/COL11A1/COL10A1
REACTOME_TNFR2_NON_CANONICAL_NF_KB_PATHWAY	REACTOME_TNFR2_NON_CANONICAL_NF_KB_PATHWAY	REACTOME_TNFR2_NON_CANONICAL_NF_KB_PATHWAY	95	-0.548994	-2.03659	1.58538e-06	5.62443e-05	4.4826e-05	3568	tags=52%, list=22%, signal=40%	PSMA5/TNFSF14/PSMC5/PSMD13/UBB/PSMB4/CHUK/PSMB2/TNFRSF8/PSMB10/PSMD1/PSMD12/PSMA4/UBA52/PSMD14/PSMA3/TNFSF8/PSMA1/TRAF3/TNFRSF12A/FASLG/RELB/TNFRSF1B/PSMD8/PSMB3/TNF/PSMD9/PSMC4/TNFRSF4/PSMD2/PSMC1/PSMC3/CD70/PSMB8/NFKB2/PSMB5/TNFRSF9/PSME1/UBE2M/PSMC6/CD40/TNFRSF11B/PSMB6/BIRC3/TNFRSF18/PSMB9/TNFSF4/TNFSF13B/TNFSF9
WP_MIRNA_TARGETS_IN_ECM_AND_MEMBRANE_RECEPTORS	WP_MIRNA_TARGETS_IN_ECM_AND_MEMBRANE_RECEPTORS	WP_MIRNA_TARGETS_IN_ECM_AND_MEMBRANE_RECEPTORS	21	-0.820044	-2.18543	1.58949e-06	5.62443e-05	4.4826e-05	2458	tags=90%, list=15%, signal=77%	LAMA4/ITGA1/LAMC1/THBS1/ITGA11/COL4A2/COL4A1/COL5A3/FN1/SDC2/LAMB2/COL6A1/COL6A2/COL5A1/COL6A3/COL3A1/COL1A2/COL5A2/THBS2
REACTOME_REGULATION_OF_RUNX3_EXPRESSION_AND_ACTIVITY	REACTOME_REGULATION_OF_RUNX3_EXPRESSION_AND_ACTIVITY	REACTOME_REGULATION_OF_RUNX3_EXPRESSION_AND_ACTIVITY	52	-0.646933	-2.15994	1.6059e-06	5.62443e-05	4.4826e-05	3568	tags=63%, list=22%, signal=50%	PSMA5/PSMC5/PSMD13/UBB/PSMB4/PSMB2/PSMB10/PSMD1/PSMD12/PSMA4/UBA52/MDM2/PSMD14/SMURF2/PSMA3/PSMA1/CBFB/PSMD8/PSMB3/PSMD9/PSMC4/PSMD2/PSMC1/PSMC3/RUNX3/PSMB8/PSMB5/PSME1/PSMC6/CDKN2A/PSMB6/TGFB1/PSMB9
KEGG_FOCAL_ADHESION	KEGG_FOCAL_ADHESION	KEGG_FOCAL_ADHESION	193	-0.443113	-1.78806	1.78357e-06	6.17404e-05	4.92064e-05	2498	tags=33%, list=15%, signal=28%	ITGB1/LAMA4/ACTB/PDGFB/PIK3R3/PARVG/ITGA1/ITGA7/VCL/PIK3CG/MYL12A/ACTN1/LAMC1/CCND1/MYL9/THBS1/ITGA4/ITGA11/AKT1/PIK3CD/LAMC2/VWF/PAK6/ITGAV/ZYX/COL4A2/AKT3/PIK3R5/ITGA3/RAC2/HRAS/LAMA5/THBS4/PARVB/RAC3/LAMA2/PDGFRB/COL4A1/FLNC/PDGFC/COL5A3/BIRC3/FN1/LAMB2/COL6A1/VEGFC/COL6A2/CAV1/COL5A1/FLNA/IBSP/CAV2/COL6A3/ITGA5/COMP/COL3A1/COL1A2/COL5A2/FYN/COL1A1/COL11A1/TNC/THBS2/SPP1
PID_UPA_UPAR_PATHWAY	PID_UPA_UPAR_PATHWAY	PID_UPA_UPAR_PATHWAY	41	-0.685411	-2.15904	1.81109e-06	6.19727e-05	4.93915e-05	1521	tags=44%, list=9%, signal=40%	ITGAV/ITGA3/PDGFRB/FN1/MMP13/FPR2/TGFB1/PLAUR/ITGA5/ITGB2/FPR3/MMP9/FPR1/SERPINE1/PLAU/ITGAM/MMP12/MMP3
REACTOME_NEGATIVE_REGULATION_OF_NOTCH4_SIGNALING	REACTOME_NEGATIVE_REGULATION_OF_NOTCH4_SIGNALING	REACTOME_NEGATIVE_REGULATION_OF_NOTCH4_SIGNALING	51	-0.654	-2.17504	1.8323e-06	6.19858e-05	4.94019e-05	3568	tags=59%, list=22%, signal=46%	PSMA5/PSMC5/PSMD13/UBB/RBX1/PSMB4/PSMB2/PSMB10/PSMD1/PSMD12/PSMA4/UBA52/PSMD14/PSMA3/PSMA1/PSMD8/PSMB3/PSMD9/PSMC4/AKT1/PSMD2/PSMC1/PSMC3/TACC3/PSMB8/PSMB5/PSME1/PSMC6/PSMB6/PSMB9
WP_LUNG_FIBROSIS	WP_LUNG_FIBROSIS	WP_LUNG_FIBROSIS	58	-0.630782	-2.13534	2.10884e-06	7.05396e-05	5.62192e-05	1985	tags=41%, list=12%, signal=36%	TNF/CXCL2/CCR2/PTX3/HMOX1/FGF2/MUC5B/FGF7/CSF2/SERPINA1/MMP2/TGFB1/CCL5/TIMP1/MMP9/IL1B/PLAU/CCL2/MT2A/GREM1/CCL4/IL6/CXCL8/SPP1
WP_INFLAMMATORY_RESPONSE_PATHWAY	WP_INFLAMMATORY_RESPONSE_PATHWAY	WP_INFLAMMATORY_RESPONSE_PATHWAY	29	-0.746262	-2.16169	2.19465e-06	7.2594e-05	5.78565e-05	2160	tags=62%, list=13%, signal=54%	CD28/TNFRSF1B/LAMC1/THBS1/LAMC2/CD80/LAMA5/CD40/IL2RA/IFNG/FN1/IL2RB/LAMB2/CD86/COL3A1/COL1A2/COL1A1/LCK
REACTOME_RESOLUTION_OF_SISTER_CHROMATID_COHESION	REACTOME_RESOLUTION_OF_SISTER_CHROMATID_COHESION	REACTOME_RESOLUTION_OF_SISTER_CHROMATID_COHESION	115	-0.515539	-1.96282	2.32125e-06	7.59379e-05	6.05216e-05	4038	tags=55%, list=25%, signal=41%	PDS5A/TUBB4B/CKAP5/NUP37/NUP43/PPP2CA/AHCTF1/PAFAH1B1/DYNLL1/NUP133/PPP2R5E/DYNC1LI1/RANGAP1/CENPI/BUB1B/NUP160/NDEL1/CDK1/ERCC6L/CENPK/CENPE/CENPH/PPP2R5C/CENPA/ZWINT/BUB3/CENPL/INCENP/CENPQ/NUDC/SEC13/ZWILCH/TUBB3/SPC25/CENPN/MIS12/TUBA4A/CDCA5/SKA2/CENPU/CENPM/TUBA1C/AURKB/BUB1/MAD2L1/MAD1L1/NUF2/KIF18A/CDCA8/PLK1/TUBB2B/BIRC5/TUBA1B/KIF2C/SPDL1/TUBA1A/SEH1L/CCNB1/TUBB2A/SKA1/CDC20/NDC80/TUBB6
REACTOME_DEGRADATION_OF_DVL	REACTOME_DEGRADATION_OF_DVL	REACTOME_DEGRADATION_OF_DVL	53	-0.636553	-2.12641	2.49278e-06	8.06632e-05	6.42875e-05	3568	tags=57%, list=22%, signal=44%	PSMA5/PSMC5/PSMD13/UBB/RBX1/DVL1/PSMB4/PSMB2/PSMB10/PSMD1/PSMD12/PSMA4/UBA52/PSMD14/PSMA3/PSMA1/PSMD8/PSMB3/PSMD9/PSMC4/PSMD2/PSMC1/PSMC3/PSMB8/PSMB5/PSME1/DACT1/PSMC6/PSMB6/PSMB9
REACTOME_PLATELET_ACTIVATION_SIGNALING_AND_AGGREGATION	REACTOME_PLATELET_ACTIVATION_SIGNALING_AND_AGGREGATION	REACTOME_PLATELET_ACTIVATION_SIGNALING_AND_AGGREGATION	251	-0.415587	-1.73668	2.58155e-06	8.26374e-05	6.5861e-05	2443	tags=29%, list=15%, signal=25%	PDGFB/PIK3R3/GNG2/PRKCH/PLCG2/VCL/PIK3CG/F13A1/ACTN1/GNA12/THBS1/FERMT3/TGFB2/TUBA4A/ECM1/SOD1/AKT1/LHFPL2/HSPA5/GNG10/TMX3/VWF/GNAI3/CTSW/SERPINA3/QSOX1/ALDOA/TIMP3/PIK3R5/RARRES2/RAC2/GNB5/F2R/PCDH7/GNG11/MANF/APBB1IP/SERPINA1/PFN1/PECAM1/GNAI2/RASGRP1/FN1/TGFB3/LYN/GNB4/CALU/ANXA5/F5/TGFB1/VEGFC/LCP2/ISLR/PDPN/FLNA/CFD/RAB27B/TIMP1/SPARC/SERPING1/COL1A2/FYN/PLEK/COL1A1/GNA15/LCK/SERPINE1/SRGN/…
BIOCARTA_COMP_PATHWAY	BIOCARTA_COMP_PATHWAY	BIOCARTA_COMP_PATHWAY	17	-0.830263	-2.14283	2.78549e-06	8.8217e-05	7.03078e-05	686	tags=41%, list=4%, signal=39%	C1R/C1S/C3/CFD/C1QA/C1QC/C1QB
KEGG_AUTOIMMUNE_THYROID_DISEASE	KEGG_AUTOIMMUNE_THYROID_DISEASE	KEGG_AUTOIMMUNE_THYROID_DISEASE	45	-0.664813	-2.13713	2.94419e-06	9.22615e-05	7.35313e-05	3034	tags=49%, list=19%, signal=40%	HLA-G/IL10/HLA-E/HLA-C/CD28/FASLG/HLA-F/GZMB/CD80/HLA-DOA/CTLA4/CD40/FAS/HLA-DPB1/HLA-DQA1/HLA-DQB1/HLA-DMB/CD86/PRF1/HLA-DPA1/HLA-DMA/HLA-DRA
KEGG_TYPE_I_DIABETES_MELLITUS	KEGG_TYPE_I_DIABETES_MELLITUS	KEGG_TYPE_I_DIABETES_MELLITUS	38	-0.690795	-2.1298	3.0264e-06	9.38498e-05	7.47971e-05	3034	tags=63%, list=19%, signal=51%	HLA-G/IL1A/HLA-E/HLA-C/CD28/FASLG/TNF/HLA-F/GZMB/CD80/HLA-DOA/FAS/IFNG/HLA-DPB1/HLA-DQA1/HLA-DQB1/GAD1/HLA-DMB/CD86/PRF1/HLA-DPA1/HLA-DMA/HLA-DRA/IL1B
WP_IMMUNE_INFILTRATION_IN_PANCREATIC_CANCER	WP_IMMUNE_INFILTRATION_IN_PANCREATIC_CANCER	WP_IMMUNE_INFILTRATION_IN_PANCREATIC_CANCER	38	-0.689062	-2.12445	3.422e-06	0.000105024	8.37025e-05	713	tags=37%, list=4%, signal=35%	IFNG/TGFB3/TGFB1/VEGFC/CCL5/CXCL1/MMP9/LGALS1/IL1B/CCL2/IL6/CXCL5/CXCL8/REG4
REACTOME_ELASTIC_FIBRE_FORMATION	REACTOME_ELASTIC_FIBRE_FORMATION	REACTOME_ELASTIC_FIBRE_FORMATION	42	-0.674976	-2.14282	3.78679e-06	0.000115033	9.16801e-05	2242	tags=55%, list=14%, signal=47%	ITGB1/FBLN5/TGFB2/LOXL3/LTBP2/LTBP3/BMP4/ITGAV/LOXL2/EMILIN2/EFEMP1/MFAP5/EMILIN1/MFAP2/FN1/EFEMP2/TGFB3/FBLN2/TGFB1/FBN1/ITGA5/LOXL1/LOX
REACTOME_MHC_CLASS_II_ANTIGEN_PRESENTATION	REACTOME_MHC_CLASS_II_ANTIGEN_PRESENTATION	REACTOME_MHC_CLASS_II_ANTIGEN_PRESENTATION	114	-0.512812	-1.95908	3.86577e-06	0.000116247	9.2647e-05	2288	tags=36%, list=14%, signal=31%	SEC24A/SEC13/TUBB3/CTSD/TUBA4A/KIF11/AP2S1/AP1S2/KIF3A/TUBA1C/AP2M1/HLA-DOA/KIF18A/OSBPL1A/TUBB2B/KLC1/TUBA1B/CTSC/KIF2C/TUBA1A/KIF20A/CTSB/KLC2/LGMN/SEC24D/DNM1/TUBB2A/AP1S3/HLA-DPB1/HLA-DQA1/HLA-DQB1/CD74/LAG3/CTSK/HLA-DMB/HLA-DPA1/HLA-DMA/CTSL/TUBB6/HLA-DRA/CTSE
WP_VEGFA_VEGFR2_SIGNALING	WP_VEGFA_VEGFR2_SIGNALING	WP_VEGFA_VEGFR2_SIGNALING	407	-0.357655	-1.55702	4.18788e-06	0.000124673	9.9363e-05	2918	tags=30%, list=18%, signal=25%	PPP3CA/MAPK12/SLC25A11/PGD/PPP1CA/MDM2/KDR/CAPZB/FUT1/FHOD1/COPG1/PRKCB/RPL27/TBCA/ITGB1/BSG/PDE4DIP/PGK1/FJX1/CALR/RPS6KB1/PDIA6/DNAJB4/EZR/LDHA/P4HB/VCL/HYOU1/MAP2K4/CCND1/TRPC1/ERG/MMRN2/STIP1/AKT1/AP2S1/CCDC124/YWHAE/SH2D2A/FLII/FMNL3/S1PR1/NR4A3/TUBA1C/SRP54/TMSB10/TMOD1/CHAC1/DNAJA1/CACNA2D1/MAP3K5/ARMCX1/ITGAV/ETS1/ADAMTS1/HSPB1/GPC1/ARF4/ALDOA/EGR3/HLX/PRKD1/TEAD4/GAPDH/PNP/RHOJ/HRAS/BIRC…
PID_AMB2_NEUTROPHILS_PATHWAY	PID_AMB2_NEUTROPHILS_PATHWAY	PID_AMB2_NEUTROPHILS_PATHWAY	40	-0.689881	-2.15123	5.23223e-06	0.000154221	0.000122912	1072	tags=45%, list=7%, signal=42%	TNF/AKT1/JAM3/SELPLG/MMP2/LYN/THY1/PLAUR/FGR/HCK/ICAM1/ITGB2/FYN/LCK/MMP9/PLAU/ITGAM/IL6
REACTOME_AUF1_HNRNP_D0_BINDS_AND_DESTABILIZES_MRNA	REACTOME_AUF1_HNRNP_D0_BINDS_AND_DESTABILIZES_MRNA	REACTOME_AUF1_HNRNP_D0_BINDS_AND_DESTABILIZES_MRNA	49	-0.642692	-2.1109	5.39811e-06	0.000157551	0.000125566	3568	tags=57%, list=22%, signal=45%	PSMA5/PSMC5/PSMD13/UBB/PSMB4/PSMB2/PSMB10/PSMD1/PSMD12/PSMA4/UBA52/PSMD14/PSMA3/PSMA1/PSMD8/PSMB3/PSMD9/PSMC4/PSMD2/PSMC1/PSMC3/PSMB8/HSPB1/PSMB5/PSME1/PSMC6/PSMB6/PSMB9
WP_MATRIX_METALLOPROTEINASES	WP_MATRIX_METALLOPROTEINASES	WP_MATRIX_METALLOPROTEINASES	29	-0.732372	-2.12146	5.50393e-06	0.000159079	0.000126784	1985	tags=52%, list=12%, signal=45%	TNF/MMP8/MMP19/TIMP3/MMP14/MMP2/MMP7/MMP13/MMP10/TIMP2/TIMP1/MMP9/MMP12/MMP3/MMP1
REACTOME_TOLL_LIKE_RECEPTOR_CASCADES	REACTOME_TOLL_LIKE_RECEPTOR_CASCADES	REACTOME_TOLL_LIKE_RECEPTOR_CASCADES	157	-0.455909	-1.80075	5.60812e-06	0.000160532	0.000127942	3228	tags=34%, list=20%, signal=27%	NFKBIA/CHUK/MAP2K1/FADD/TLR7/MAPKAPK2/CD36/TLR6/UBA52/IRAK3/PELI3/UNC93B1/RPS6KA2/TRAF3/TLR5/BTK/PLCG2/MAP2K4/FOS/NKIRAS1/MAPK11/S100B/NFKB2/LY86/HSP90B1/RIPK2/USP14/TIFA/NLRC5/MAP3K8/SOCS1/DUSP7/IRF7/DUSP6/CTSB/BIRC3/LGMN/DNM1/TLR1/S100A12/TLR8/CTSK/TLR2/USP18/IKBIP/ITGB2/CTSL/CD14/LY96/ITGAM/S100A9/S100A8/DUSP4
KEGG_VIRAL_MYOCARDITIS	KEGG_VIRAL_MYOCARDITIS	KEGG_VIRAL_MYOCARDITIS	64	-0.590824	-2.02897	6.07829e-06	0.000172334	0.000137348	2754	tags=47%, list=17%, signal=39%	HLA-E/HLA-C/SGCD/CD28/ACTB/CCND1/HLA-F/SGCB/CD80/ITGAL/HLA-DOA/RAC2/RAC3/LAMA2/CD40/MYH10/HLA-DPB1/HLA-DQA1/HLA-DQB1/CAV1/CD55/HLA-DMB/CD86/PRF1/HLA-DPA1/HLA-DMA/ICAM1/ITGB2/FYN/HLA-DRA
WP_PLEURAL_MESOTHELIOMA	WP_PLEURAL_MESOTHELIOMA	WP_PLEURAL_MESOTHELIOMA	420	-0.35149	-1.53042	6.5448e-06	0.00018381	0.000146494	2232	tags=24%, list=14%, signal=21%	ANGPT2/PIK3CG/MAP3K9/WNT10A/MAP2K4/FZD1/LAMC1/CCND1/ITGA4/CDH2/DKK2/EED/AKT1/PIK3CD/FGFR1/LAMC2/SOX17/MAP4K4/STK3/MAP3K5/PAK6/FABP4/ITGAV/ADAMTS1/LATS2/NLRP3/FOXM1/MAD2L1/COL4A2/AKT3/MAD1L1/FGF2/EIF4EBP1/WNT5A/FGF7/ITGA3/CDH16/TEAD4/ROR1/SLC7A5/MDK/HRAS/LAMA5/KITLG/CSF2/CDH5/WNT2/RASSF2/LAMA2/CDKN2A/PDGFRB/ACTC1/RASSF5/COL4A1/MMP14/MMP2/EPHA2/PDGFC/ROR2/FZD2/UHRF1/SERPINF1/FN1/SAV1/CSF1R/WWTR1/HI…
REACTOME_INITIAL_TRIGGERING_OF_COMPLEMENT	REACTOME_INITIAL_TRIGGERING_OF_COMPLEMENT	REACTOME_INITIAL_TRIGGERING_OF_COMPLEMENT	20	-0.797336	-2.10647	6.73775e-06	0.00018746	0.000149404	686	tags=40%, list=4%, signal=38%	C1R/FCN1/C1S/C3/CFD/C1QA/C1QC/C1QB
REACTOME_MITOTIC_G2_G2_M_PHASES	REACTOME_MITOTIC_G2_G2_M_PHASES	REACTOME_MITOTIC_G2_G2_M_PHASES	185	-0.443423	-1.78323	7.22048e-06	0.000199031	0.000158625	4061	tags=45%, list=25%, signal=34%	PSMD3/CDC25B/TUBB4B/CKAP5/LIN54/PPP2CA/CDK2/HAUS3/PAFAH1B1/DYNLL1/CETN2/PSMA5/OPTN/PSMC5/PSMD13/UBB/ODF2/HAUS6/RBX1/HSP90AB1/ACTR1A/LIN9/PSMB4/PSMB2/RBBP4/PSMB10/PSMD1/PSMD12/SDCCAG8/CDK1/PSMA4/HAUS8/UBA52/PPP1R12A/PSMD14/PSMA3/CEP78/CEP192/NEDD1/PSMA1/PLK4/PSMD8/TUBB3/PSMB3/LIN52/CEP135/TUBA4A/PSMD9/PSMC4/YWHAE/HMMR/PSMD2/PSMC1/TUBA1C/PSMC3/FBXL7/TUBG2/PSMB8/CCNA2/FOXM1/TUBB/PSMB5/PLK1/TUBB2B/MZ…
WP_EBOLA_VIRUS_INFECTION_IN_HOST	WP_EBOLA_VIRUS_INFECTION_IN_HOST	WP_EBOLA_VIRUS_INFECTION_IN_HOST	123	-0.495598	-1.90678	7.41047e-06	0.000202291	0.000161224	2498	tags=36%, list=15%, signal=30%	ITGB1/CD209/ACTB/PIK3R3/ICAM2/ITGA1/RELB/NPC2/ACTN1/ITGA4/HLA-F/AKT1/PIK3CD/NPC1/NFKB2/ITGAV/HLA-DOA/ITGA3/EIF2S1/TIAM1/IRF7/MFGE8/FLNC/CTSB/C1QBP/AXL/SOCS3/CD300A/HLA-DPB1/HLA-DQA1/HLA-DQB1/CAV1/HLA-DMB/HAVCR2/FLNA/STAT1/CAV2/HLA-DPA1/HLA-DMA/ITGA5/CTSL/HLA-DRA/TFAP2A/BST2
REACTOME_MITOTIC_SPINDLE_CHECKPOINT	REACTOME_MITOTIC_SPINDLE_CHECKPOINT	REACTOME_MITOTIC_SPINDLE_CHECKPOINT	105	-0.510966	-1.92766	7.47466e-06	0.000202291	0.000161224	3983	tags=53%, list=25%, signal=40%	CKAP5/NUP37/NUP43/PPP2CA/AHCTF1/ANAPC11/PAFAH1B1/DYNLL1/NUP133/PPP2R5E/CDC23/DYNC1LI1/ANAPC10/RANGAP1/CENPI/BUB1B/NUP160/NDEL1/ERCC6L/CENPK/CENPE/UBE2E1/CENPH/PPP2R5C/CENPA/ZWINT/BUB3/CENPL/INCENP/CENPQ/NUDC/SEC13/ZWILCH/SPC25/CENPN/MIS12/SKA2/CENPU/CENPM/AURKB/BUB1/MAD2L1/MAD1L1/NUF2/KIF18A/CDCA8/PLK1/BIRC5/CDC27/KIF2C/SPDL1/SEH1L/SKA1/CDC20/NDC80/UBE2S
PID_TOLL_ENDOGENOUS_PATHWAY	PID_TOLL_ENDOGENOUS_PATHWAY	PID_TOLL_ENDOGENOUS_PATHWAY	23	-0.772177	-2.1308	7.86382e-06	0.000210906	0.00016809	457	tags=35%, list=3%, signal=34%	TLR1/TLR2/VCAN/CD14/LY96/BGN/S100A9/S100A8
KEGG_CHEMOKINE_SIGNALING_PATHWAY	KEGG_CHEMOKINE_SIGNALING_PATHWAY	KEGG_CHEMOKINE_SIGNALING_PATHWAY	179	-0.443225	-1.77448	8.16198e-06	0.000216948	0.000172905	1917	tags=28%, list=12%, signal=25%	PF4V1/AKT1/PIK3CD/CXCL2/STAT2/GNG10/CCR2/CXCR1/CX3CL1/GNAI3/AKT3/PIK3R5/RAC2/GNB5/HRAS/TIAM1/GNG11/NCF1/DOCK2/JAK2/GNAI2/CCR5/CCL7/CCL21/LYN/GNB4/CXCR2/ADCY7/CCL13/CXCL3/CXCL16/CCL26/CCL5/STAT1/CCR1/FGR/HCK/CXCL1/CXCL13/CCL2/CXCR4/CXCL6/CXCL9/CCL4/CXCL11/CCL8/PPBP/CXCL10/CXCL5/CXCL8/CCL18
KEGG_PROTEASOME	KEGG_PROTEASOME	KEGG_PROTEASOME	40	-0.680339	-2.12148	9.55284e-06	0.000251671	0.000200579	3568	tags=62%, list=22%, signal=49%	PSMA5/PSMC5/PSMD13/PSMB4/PSMB2/PSMB10/PSMD1/PSMD12/PSMA4/PSMD14/PSMA3/PSMA1/PSMD8/PSMB3/PSMC4/PSMD2/PSMC1/PSMC3/PSMB8/PSMB5/PSME1/PSMC6/PSMB6/IFNG/PSMB9
WP_PROSTAGLANDIN_SIGNALING	WP_PROSTAGLANDIN_SIGNALING	WP_PROSTAGLANDIN_SIGNALING	32	-0.702489	-2.08136	9.85163e-06	0.000257266	0.000205038	1638	tags=53%, list=10%, signal=48%	CCR2/PTGES/NLRP3/AHR/KLRD1/IRF7/IFNG/PTGER2/TGFB1/CXCL1/MMP9/IL1B/CCL2/CXCL9/IL6/CXCL10/CXCL8
REACTOME_CELL_SURFACE_INTERACTIONS_AT_THE_VASCULAR_WALL	REACTOME_CELL_SURFACE_INTERACTIONS_AT_THE_VASCULAR_WALL	REACTOME_CELL_SURFACE_INTERACTIONS_AT_THE_VASCULAR_WALL	133	-0.477349	-1.84602	1.21615e-05	0.000314144	0.000250369	1591	tags=31%, list=10%, signal=28%	JAM3/SIRPG/ITGAV/SIRPA/GPC1/GYPC/ITGA3/SLC7A5/HRAS/SELPLG/PROCR/DOK2/ESAM/CD2/PECAM1/THBD/CD84/FN1/SDC2/MIF/LYN/SELE/CD99/ITGAX/CD74/TGFB1/CAV1/SELL/SLC7A11/ITGA5/ITGB2/COL1A2/FYN/COL1A1/LCK/SLC7A7/ITGAM/OLR1/FCER1G/TREM1/MMP1
WP_PROTEASOME_DEGRADATION	WP_PROTEASOME_DEGRADATION	WP_PROTEASOME_DEGRADATION	56	-0.602426	-2.02873	1.22685e-05	0.000314144	0.000250369	3568	tags=59%, list=22%, signal=46%	PSMA5/PSMC5/PSMD13/UBB/HLA-B/PSMB4/PSMB2/PSMB10/PSMD1/PSMD12/HLA-G/PSMA4/HLA-E/HLA-C/PSMA3/PSMA1/PSMD8/PSMB3/HLA-F/PSMD9/PSMC4/RPN1/PSMD2/PSMC1/PSMC3/PSMB8/PSMB5/PSME1/UCHL1/PSMC6/PSMB6/IFNG/PSMB9
BIOCARTA_INFLAM_PATHWAY	BIOCARTA_INFLAM_PATHWAY	BIOCARTA_INFLAM_PATHWAY	25	-0.749673	-2.07461	1.23509e-05	0.000314144	0.000250369	2068	tags=48%, list=13%, signal=42%	TGFB2/TNF/CD4/CSF2/IL15/IFNG/TGFB3/IL11/TGFB1/HLA-DRA/IL6/CXCL8
REACTOME_INTERFERON_GAMMA_SIGNALING	REACTOME_INTERFERON_GAMMA_SIGNALING	REACTOME_INTERFERON_GAMMA_SIGNALING	87	-0.532502	-1.9407	1.24518e-05	0.000314144	0.000250369	944	tags=28%, list=6%, signal=26%	SOCS1/GBP2/IRF7/JAK2/IRF1/OAS3/TRIM29/IFNG/TRIM22/VCAM1/SOCS3/HLA-DPB1/PTAFR/HLA-DQA1/HLA-DQB1/STAT1/GBP1/GBP4/HLA-DPA1/ICAM1/GBP5/HLA-DRA/OAS2/MT2A
WP_CYTOKINES_AND_INFLAMMATORY_RESPONSE	WP_CYTOKINES_AND_INFLAMMATORY_RESPONSE	WP_CYTOKINES_AND_INFLAMMATORY_RESPONSE	25	-0.748178	-2.07047	1.33324e-05	0.000333534	0.000265822	1985	tags=48%, list=12%, signal=42%	TNF/CD4/CXCL2/CSF2/IL15/IFNG/IL11/TGFB1/CXCL1/HLA-DRA/IL1B/IL6
KEGG_PEROXISOME	KEGG_PEROXISOME	KEGG_PEROXISOME	77	0.5783	1.9396	1.36854e-05	0.000339512	0.000270586	3561	tags=51%, list=22%, signal=40%	ACSL5/MPV17L/PRDX5/PHYH/ACOX2/PEX11A/ACSL6/EPHX2/AMACR/XDH/PXMP4/ACOX1/PIPOX/NUDT12/DDO/ACOT8/FAR2/CAT/SLC27A2/DECR2/PXMP2/CROT/PECR/EHHADH/MLYCD/HSD17B4/NUDT19/PEX11G/PEX26/AGXT/SCP2/ACSL3/ACAA1/ABCD3/PEX16/GSTK1/PEX1/IDH2/MVK
WP_CHRONIC_HYPERGLYCEMIA_IMPAIRMENT_OF_NEURON_FUNCTION	WP_CHRONIC_HYPERGLYCEMIA_IMPAIRMENT_OF_NEURON_FUNCTION	WP_CHRONIC_HYPERGLYCEMIA_IMPAIRMENT_OF_NEURON_FUNCTION	44	-0.633926	-2.0259	1.38559e-05	0.000340867	0.000271667	848	tags=27%, list=5%, signal=26%	MMP14/MMP2/MMP7/SLC2A1/MMP13/C3/MMP10/MMP9/SLC2A3/MMP12/MMP3/MMP1
KEGG_CELL_ADHESION_MOLECULES_CAMS	KEGG_CELL_ADHESION_MOLECULES_CAMS	KEGG_CELL_ADHESION_MOLECULES_CAMS	124	-0.485489	-1.86643	1.3969e-05	0.000340867	0.000271667	2754	tags=44%, list=17%, signal=37%	HLA-E/HLA-C/JAM2/SELP/ITGB7/NLGN4X/CD28/ITGB1/L1CAM/ICAM2/ITGA4/CDH2/HLA-F/CD4/CD80/CNTNAP2/ITGAL/ICOS/JAM3/CNTNAP1/ITGAV/HLA-DOA/PTPRM/CTLA4/CDH5/ALCAM/SELPLG/CD40/ESAM/CD2/PECAM1/PDCD1LG2/CD8A/SIGLEC1/VCAM1/SDC2/PTPRC/SELE/CD99/HLA-DPB1/HLA-DQA1/CDH3/HLA-DQB1/SELL/HLA-DMB/VCAN/CD274/CD86/HLA-DPA1/HLA-DMA/ICAM1/ITGB2/HLA-DRA/CLDN18/ITGAM
REACTOME_G2_M_CHECKPOINTS	REACTOME_G2_M_CHECKPOINTS	REACTOME_G2_M_CHECKPOINTS	124	-0.485078	-1.86485	1.4154e-05	0.000342574	0.000273027	3615	tags=44%, list=22%, signal=34%	ORC5/PSMA5/PSMC5/PSMD13/UBB/PSMB4/PSMB2/PSMB10/PSMD1/PSMD12/CDK1/PSMA4/UBA52/NBN/MCM7/CHEK1/DBF4/PSMD14/PSMA3/PSMA1/RFC5/RFC4/PSMD8/MCM3/PSMB3/RFC2/PSMD9/PSMC4/YWHAE/RPA1/PSMD2/MCM6/PSMC1/RPA2/PSMC3/CLSPN/PSMB8/MCM2/SFN/MCM5/PSMB5/MCM4/CDC45/EXO1/ORC1/PSME1/PSMC6/MCM10/RBBP8/PSMB6/CDC6/CCNB1/CDC7/PSMB9
KEGG_MEDICUS_REFERENCE_ANTIGEN_PROCESSING_AND_PRESENTATION_BY_MHC_CLASS_II_MOLECULES	KEGG_MEDICUS_REFERENCE_ANTIGEN_PROCESSING_AND_PRESENTATION_BY_MHC_CLASS_II_MOLECULES	KEGG_MEDICUS_REFERENCE_ANTIGEN_PROCESSING_AND_PRESENTATION_BY_MHC_CLASS_II_MOLECULES	10	-0.894216	-2.01638	1.4478e-05	0.000347589	0.000277024	535	tags=90%, list=3%, signal=87%	HLA-DOA/HLA-DPB1/HLA-DQA1/HLA-DQB1/CD74/HLA-DMB/HLA-DPA1/HLA-DMA/HLA-DRA
REACTOME_MITOTIC_PROMETAPHASE	REACTOME_MITOTIC_PROMETAPHASE	REACTOME_MITOTIC_PROMETAPHASE	189	-0.439662	-1.77385	1.47866e-05	0.000352158	0.000280666	3989	tags=47%, list=25%, signal=36%	TUBB4B/CKAP5/NUP37/SMC4/SMC2/NUP43/PPP2CA/AHCTF1/HAUS3/PAFAH1B1/DYNLL1/CETN2/NEK7/NUP133/PPP2R5E/ODF2/HAUS6/DYNC1LI1/ACTR1A/RANGAP1/CENPI/BUB1B/NUP160/NDEL1/SDCCAG8/CDK1/HAUS8/ERCC6L/CENPK/CENPE/CENPH/PPP2R5C/CENPA/CEP78/ZWINT/BUB3/CEP192/NEDD1/CENPL/PLK4/INCENP/CENPQ/NCAPH/NUDC/SEC13/ZWILCH/TUBB3/SPC25/CENPN/CEP135/MIS12/TUBA4A/CDCA5/SKA2/CENPU/YWHAE/CENPM/TUBA1C/AURKB/TUBG2/BUB1/TUBB/MAD2L1/MAD…
REACTOME_ACTIVATION_OF_MATRIX_METALLOPROTEINASES	REACTOME_ACTIVATION_OF_MATRIX_METALLOPROTEINASES	REACTOME_ACTIVATION_OF_MATRIX_METALLOPROTEINASES	31	-0.704521	-2.0611	1.75866e-05	0.000415519	0.000331163	848	tags=42%, list=5%, signal=40%	PRSS2/MMP14/MMP2/MMP7/COL18A1/MMP13/CTSK/MMP10/TIMP2/TIMP1/MMP9/MMP3/MMP1
REACTOME_HIV_INFECTION	REACTOME_HIV_INFECTION	REACTOME_HIV_INFECTION	215	-0.418195	-1.71908	1.79575e-05	0.00042094	0.000335484	4212	tags=44%, list=26%, signal=33%	CDK9/SLC25A4/TAF3/AP1M1/VPS37A/NUP93/PSMD3/NMT1/GTF2H4/NUP37/KPNB1/NUP43/GTF2A2/AP1S1/KPNA1/PSMA5/NUP133/NUP205/PSMC5/PSMD13/UBB/RBX1/PSMB4/GTF2A1/PSMB2/NUP62/SSRP1/RANGAP1/PSMB10/PSMD1/PSMD12/NUP160/PSMA4/NUP50/GTF2B/UBA52/BANF1/NUP35/PSMD14/PSMA3/NUP155/PSMA1/CD28/AP2B1/SEC13/PSMD8/PSIP1/NUP210/PSMB3/POLR2E/TAF12/POLR2A/PSMD9/POLR2I/CD4/PSMC4/RNMT/AP2S1/AP1S2/POLR2G/RCC1/PSMD2/NPM1/PSMC1/PSMC3/…
REACTOME_PEROXISOMAL_LIPID_METABOLISM	REACTOME_PEROXISOMAL_LIPID_METABOLISM	REACTOME_PEROXISOMAL_LIPID_METABOLISM	29	0.723757	1.98385	2.02048e-05	0.000469919	0.00037452	3029	tags=59%, list=19%, signal=48%	PHYH/ACOX2/AMACR/ACOX1/ACOT8/NUDT7/SLC27A2/DECR2/CROT/PECR/EHHADH/ACBD4/MLYCD/HSD17B4/NUDT19/SCP2/ACAA1
REACTOME_MET_ACTIVATES_PTK2_SIGNALING	REACTOME_MET_ACTIVATES_PTK2_SIGNALING	REACTOME_MET_ACTIVATES_PTK2_SIGNALING	30	-0.69972	-2.03166	2.06696e-05	0.000477002	0.000380165	2498	tags=57%, list=15%, signal=48%	ITGB1/COL24A1/LAMA4/LAMC1/LAMC2/ITGA3/LAMA5/LAMA2/COL5A3/FN1/LAMB2/COL5A1/COL3A1/COL1A2/COL5A2/COL1A1/COL11A1
BIOCARTA_MHC_PATHWAY	BIOCARTA_MHC_PATHWAY	BIOCARTA_MHC_PATHWAY	10	-0.890078	-2.00704	2.10409e-05	0.000481836	0.000384017	1569	tags=80%, list=10%, signal=72%	PSMB8/PSMB5/PSMB6/TAP2/CD74/TAP1/PSMB9/HLA-DRA
WP_INTERACTIONS_BETWEEN_IMMUNE_CELLS_AND_MICRORNAS_IN_TUMOR_MICROENVIRONMENT	WP_INTERACTIONS_BETWEEN_IMMUNE_CELLS_AND_MICRORNAS_IN_TUMOR_MICROENVIRONMENT	WP_INTERACTIONS_BETWEEN_IMMUNE_CELLS_AND_MICRORNAS_IN_TUMOR_MICROENVIRONMENT	28	-0.70454	-2.03124	2.53595e-05	0.000575315	0.000458519	2068	tags=57%, list=13%, signal=50%	TGFB2/CD80/NFKB2/CTLA4/SOCS1/IL2RA/IL2RB/TGFB3/PIAS3/TLR8/TGFB1/CD274/CCL5/CD86/CCL2/CXCL10
REACTOME_DIGESTION	REACTOME_DIGESTION	REACTOME_DIGESTION	17	0.80546	1.98211	2.56662e-05	0.000575315	0.000458519	659	tags=35%, list=4%, signal=34%	CEL/GUCA2A/GUCY2C/GUCA2B/TREH/SI
REACTOME_REGULATION_OF_TLR_BY_ENDOGENOUS_LIGAND	REACTOME_REGULATION_OF_TLR_BY_ENDOGENOUS_LIGAND	REACTOME_REGULATION_OF_TLR_BY_ENDOGENOUS_LIGAND	18	-0.790059	-2.05392	2.57027e-05	0.000575315	0.000458519	457	tags=33%, list=3%, signal=32%	TLR1/TLR2/CD14/LY96/S100A9/S100A8
REACTOME_PD_1_SIGNALING	REACTOME_PD_1_SIGNALING	REACTOME_PD_1_SIGNALING	18	-0.789791	-2.05322	2.63334e-05	0.000585035	0.000466265	2105	tags=67%, list=13%, signal=58%	CD3E/CD4/CD3D/CD247/PDCD1LG2/HLA-DPB1/HLA-DQA1/HLA-DQB1/CD274/HLA-DPA1/LCK/HLA-DRA
BIOCARTA_CLASSIC_PATHWAY	BIOCARTA_CLASSIC_PATHWAY	BIOCARTA_CLASSIC_PATHWAY	12	-0.865858	-2.03361	2.65706e-05	0.000585932	0.00046698	686	tags=50%, list=4%, signal=48%	C1R/C1S/C3/C1QA/C1QC/C1QB
KEGG_RETINOL_METABOLISM	KEGG_RETINOL_METABOLISM	KEGG_RETINOL_METABOLISM	45	0.654128	1.98222	2.79055e-05	0.000610843	0.000486834	2191	tags=33%, list=14%, signal=29%	UGT2B17/UGT2A3/ADH1C/CYP2B6/ADH6/CYP3A5/UGT2B15/DHRS3/PNPLA4/RETSAT/DHRS9/DGAT1/CYP3A4/DGAT2/ADH4
REACTOME_SYNTHESIS_OF_IP3_AND_IP4_IN_THE_CYTOSOL	REACTOME_SYNTHESIS_OF_IP3_AND_IP4_IN_THE_CYTOSOL	REACTOME_SYNTHESIS_OF_IP3_AND_IP4_IN_THE_CYTOSOL	26	0.730998	1.96403	3.09216e-05	0.000671925	0.000535516	1006	tags=31%, list=6%, signal=29%	PLCB4/INPP5J/INPP5D/PLCG1/PLCD1/OCRL/PLCE1/PLCB1
WP_PLATELET_MEDIATED_INTERACTIONS_WITH_VASCULAR_AND_CIRCULATING_CELLS	WP_PLATELET_MEDIATED_INTERACTIONS_WITH_VASCULAR_AND_CIRCULATING_CELLS	WP_PLATELET_MEDIATED_INTERACTIONS_WITH_VASCULAR_AND_CIRCULATING_CELLS	17	-0.793465	-2.04786	3.1231e-05	0.00067373	0.000536955	1072	tags=65%, list=7%, signal=60%	SELPLG/CD40/TGFB3/VCAM1/SELE/TGFB1/TLR2/CCL5/ICAM1/IL1B/CCL2
REACTOME_TCR_SIGNALING	REACTOME_TCR_SIGNALING	REACTOME_TCR_SIGNALING	108	-0.484556	-1.82984	3.23653e-05	0.000693176	0.000552453	3637	tags=46%, list=23%, signal=36%	TRAT1/HLA-DQB2/PSMA5/PSMC5/PSMD13/UBB/NFKBIA/PSMB4/CHUK/PSMB2/PSMB10/PSMD1/PSMD12/PSMA4/UBA52/CD3G/PSMD14/PSMA3/PSMA1/PLCG2/ITK/PSMD8/CD3E/PSMB3/PSMD9/CD4/CD3D/PSMC4/MALT1/PSMD2/PSMC1/PSMC3/PSMB8/PTPN22/CD247/PSMB5/EVL/PSME1/RIPK2/PSMC6/PSMB6/PTPRC/HLA-DPB1/HLA-DQA1/HLA-DQB1/PSMB9/LCP2/HLA-DPA1/LCK/HLA-DRA
REACTOME_NON_INTEGRIN_MEMBRANE_ECM_INTERACTIONS	REACTOME_NON_INTEGRIN_MEMBRANE_ECM_INTERACTIONS	REACTOME_NON_INTEGRIN_MEMBRANE_ECM_INTERACTIONS	56	-0.585116	-1.97044	3.42374e-05	0.000728033	0.000580233	2498	tags=48%, list=15%, signal=41%	ITGB1/LAMA4/PDGFB/ACTN1/LAMC1/THBS1/LAMC2/ITGAV/COL4A2/FGF2/LAMA5/LAMA2/COL4A1/COL5A3/DDR2/FN1/SDC2/LAMB2/TGFB1/COL5A1/COL3A1/COL1A2/COL5A2/COL1A1/COL11A1/TNC/COL10A1
REACTOME_FATTY_ACIDS	REACTOME_FATTY_ACIDS	REACTOME_FATTY_ACIDS	14	0.851144	1.98871	3.55163e-05	0.000749872	0.000597639	1280	tags=50%, list=8%, signal=46%	CYP2B6/CYP4F2/CYP4F12/CYP4F3/CYP4F11/CYP2D6/CYP2J2
PID_GLYPICAN_1PATHWAY	PID_GLYPICAN_1PATHWAY	PID_GLYPICAN_1PATHWAY	26	-0.717148	-2.02893	3.67806e-05	0.000771097	0.000614554	2331	tags=62%, list=14%, signal=53%	SMAD2/TGFB2/FGFR1/TGFBR1/GPC1/FGF2/SLIT2/PRNP/TGFB3/LYN/TGFB1/FGR/HCK/FYN/LCK/PLA2G2A
REACTOME_STIMULI_SENSING_CHANNELS	REACTOME_STIMULI_SENSING_CHANNELS	REACTOME_STIMULI_SENSING_CHANNELS	100	0.531151	1.86243	3.75858e-05	0.000782468	0.000623617	2094	tags=26%, list=13%, signal=23%	SGK2/CLCA1/ANO9/SCNN1B/CLCA4/TRPM6/WNK4/WNK2/BEST2/TRPM4/CLCN2/SCNN1A/SRI/WWP1/ANO10/NEDD4L/ANO7/RIPK3/CLCN7/TRPC4AP/TRPM7/SCNN1G/CLCN3/TPCN1/CLCN5/TRPA1
REACTOME_STABILIZATION_OF_P53	REACTOME_STABILIZATION_OF_P53	REACTOME_STABILIZATION_OF_P53	52	-0.59983	-2.00268	3.8212e-05	0.000789979	0.000629603	3568	tags=56%, list=22%, signal=44%	PSMA5/PSMC5/PSMD13/UBB/PSMB4/PSMB2/PSMB10/PSMD1/PSMD12/PSMA4/UBA52/MDM2/PSMD14/PSMA3/PSMA1/PSMD8/PSMB3/PSMD9/PSMC4/PSMD2/PSMC1/PSMC3/PSMB8/PSMB5/PSME1/PSMC6/CDKN2A/PSMB6/PSMB9
PID_IL23_PATHWAY	PID_IL23_PATHWAY	PID_IL23_PATHWAY	37	-0.671491	-2.05434	3.94212e-05	0.000809357	0.000645048	2369	tags=57%, list=15%, signal=49%	NFKBIA/ALOX12B/STAT4/IL12RB1/NOS2/CD3E/TNF/CD4/IL23A/ITGA3/IL18/JAK2/IFNG/SOCS3/STAT1/CXCL1/IL24/IL1B/CCL2/CXCL9/IL6
REACTOME_BINDING_AND_UPTAKE_OF_LIGANDS_BY_SCAVENGER_RECEPTORS	REACTOME_BINDING_AND_UPTAKE_OF_LIGANDS_BY_SCAVENGER_RECEPTORS	REACTOME_BINDING_AND_UPTAKE_OF_LIGANDS_BY_SCAVENGER_RECEPTORS	38	-0.64655	-1.99338	4.09937e-05	0.000835878	0.000666184	1405	tags=39%, list=9%, signal=36%	COL4A2/HSP90B1/FTH1/HSP90AA1/COL4A1/APOL1/COLEC12/SPARC/COL3A1/MSR1/COL1A2/COL1A1/MARCO/CD163/APOE
WP_IL_19_SIGNALING_PATHWAY_MAP	WP_IL_19_SIGNALING_PATHWAY_MAP	WP_IL_19_SIGNALING_PATHWAY_MAP	28	-0.694548	-2.00243	4.19938e-05	0.000850446	0.000677795	1985	tags=43%, list=12%, signal=38%	ACTA2/TNF/AKT1/IL20RB/SOCS1/CCNB1/TGFB1/MUC5AC/STAT1/COL1A1/CXCR4/MMP1
WP_FIBRIN_COMPLEMENT_RECEPTOR_3_SIGNALING_PATHWAY	WP_FIBRIN_COMPLEMENT_RECEPTOR_3_SIGNALING_PATHWAY	WP_FIBRIN_COMPLEMENT_RECEPTOR_3_SIGNALING_PATHWAY	42	-0.63587	-2.01867	4.36768e-05	0.000878552	0.000700195	380	tags=24%, list=2%, signal=23%	RASSF5/CXCL3/ITGB2/CD14/LY96/ITGAM/CCL2/TYROBP/IL6/CXCL10
REACTOME_DIGESTION_AND_ABSORPTION	REACTOME_DIGESTION_AND_ABSORPTION	REACTOME_DIGESTION_AND_ABSORPTION	21	0.769314	2.00296	4.57638e-05	0.000914354	0.000728729	659	tags=33%, list=4%, signal=32%	CEL/GUCA2A/GUCY2C/SLC5A1/GUCA2B/TREH/SI
KEGG_MEDICUS_REFERENCE_MICROTUBULE_DEPOLYMERIZATION_AT_THE_MINUS_ENDS	KEGG_MEDICUS_REFERENCE_MICROTUBULE_DEPOLYMERIZATION_AT_THE_MINUS_ENDS	KEGG_MEDICUS_REFERENCE_MICROTUBULE_DEPOLYMERIZATION_AT_THE_MINUS_ENDS	16	-0.802267	-2.03799	4.94937e-05	0.000982285	0.000782869	2082	tags=69%, list=13%, signal=60%	TUBB3/TUBA4A/TUBA1C/TUBB/PLK1/TUBB2B/TUBA1B/PSRC1/TUBA1A/TUBB2A/TUBB6
PID_INTEGRIN3_PATHWAY	PID_INTEGRIN3_PATHWAY	PID_INTEGRIN3_PATHWAY	41	-0.628674	-1.98031	5.30472e-05	0.00104584	0.00083352	934	tags=49%, list=6%, signal=46%	L1CAM/LAMA4/PDGFB/LAMC1/THBS1/ITGAV/PDGFRB/COL4A1/PECAM1/FN1/THY1/PLAUR/IBSP/FBN1/COL1A2/COL1A1/PLAU/TNC/SPHK1/SPP1
KEGG_MEDICUS_VARIANT_MUTATION_CAUSED_ABERRANT_SOD1_TO_26S_PROTEASOME_MEDIATED_PROTEIN_DEGRADATION	KEGG_MEDICUS_VARIANT_MUTATION_CAUSED_ABERRANT_SOD1_TO_26S_PROTEASOME_MEDIATED_PROTEIN_DEGRADATION	KEGG_MEDICUS_VARIANT_MUTATION_CAUSED_ABERRANT_SOD1_TO_26S_PROTEASOME_MEDIATED_PROTEIN_DEGRADATION	39	-0.644027	-1.99995	5.51959e-05	0.00108104	0.000861576	3568	tags=62%, list=22%, signal=48%	PSMA5/PSMC5/PSMD13/UBB/PSMB4/PSMB2/PSMD1/PSMD12/PSMA4/UBA52/PSMD14/PSMA3/PSMA1/PSMD8/PSMB3/PSMD9/SOD1/PSMC4/PSMD2/PSMC1/PSMC3/PSMB5/PSMC6/PSMB6
WP_CYTOSOLIC_DNA_SENSING_PATHWAY	WP_CYTOSOLIC_DNA_SENSING_PATHWAY	WP_CYTOSOLIC_DNA_SENSING_PATHWAY	66	-0.549237	-1.89756	5.65545e-05	0.00110041	0.000877013	1295	tags=18%, list=8%, signal=17%	IL18/POLR2L/IRF7/RNF125/POLR3G/CCL5/ISG15/IL1B/AIM2/CCL4/IL6/CXCL10
WP_SELECTIVE_EXPRESSION_OF_CHEMOKINE_RECEPTORS_DURING_T_CELL_POLARIZATION	WP_SELECTIVE_EXPRESSION_OF_CHEMOKINE_RECEPTORS_DURING_T_CELL_POLARIZATION	WP_SELECTIVE_EXPRESSION_OF_CHEMOKINE_RECEPTORS_DURING_T_CELL_POLARIZATION	28	-0.687969	-1.98346	6.18684e-05	0.00119599	0.000953188	2719	tags=50%, list=17%, signal=42%	IL12RB1/CD28/IL12RB2/TGFB2/CD4/CCR2/CSF2/CCR5/IFNG/TGFB3/TGFB1/CCR1/CXCR4/CCL4
REACTOME_COMPLEMENT_CASCADE	REACTOME_COMPLEMENT_CASCADE	REACTOME_COMPLEMENT_CASCADE	53	-0.583875	-1.95043	6.36244e-05	0.00121381	0.000967391	686	tags=28%, list=4%, signal=27%	CFI/C4BPB/C1R/FCN1/C1S/CFH/C3/CD55/CFD/C3AR1/C1QA/C1QC/SERPING1/C1QB/C5AR1
WP_DISTURBED_PATHWAYS_IN_DUCHENNE_MUSCULAR_DYSTROPHY	WP_DISTURBED_PATHWAYS_IN_DUCHENNE_MUSCULAR_DYSTROPHY	WP_DISTURBED_PATHWAYS_IN_DUCHENNE_MUSCULAR_DYSTROPHY	70	-0.540447	-1.9028	6.39236e-05	0.00121381	0.000967391	2377	tags=37%, list=15%, signal=32%	TRPC6/ITPR1/IL1A/IL10/AGTR1/SSPN/NOS2/SMAD2/TRPC1/TNF/PPIF/CACNA2D1/TGFBR1/MMP2/GP2/SLN/NOX4/TGFB1/CYBB/MMP9/SERPINE1/PLAU/PLA2G4A/IL6/PLA2G2A/SPP1
WP_LTF_DANGER_SIGNAL_RESPONSE_PATHWAY	WP_LTF_DANGER_SIGNAL_RESPONSE_PATHWAY	WP_LTF_DANGER_SIGNAL_RESPONSE_PATHWAY	19	-0.775266	-2.05856	6.40135e-05	0.00121381	0.000967391	325	tags=32%, list=2%, signal=31%	TLR2/CD14/IL1B/TREM1/IL6/CXCL8
WP_FOCAL_ADHESION	WP_FOCAL_ADHESION	WP_FOCAL_ADHESION	193	-0.406257	-1.63934	6.47788e-05	0.00122055	0.000972761	2498	tags=31%, list=15%, signal=26%	ITGB1/LAMA4/ACTB/PDGFB/PIK3R3/PARVG/ITGA1/ITGA7/VCL/MYL12A/ACTN1/LAMC1/CCND1/MYL9/THBS1/ITGA4/ITGA11/AKT1/PIK3CD/LAMC2/VWF/PAK6/ITGAV/ZYX/COL4A2/AKT3/ITGA3/RAC2/HRAS/LAMA5/THBS4/PARVB/RAC3/LAMA2/PDGFRB/COL4A1/FLNC/PDGFC/COL5A3/BIRC3/FN1/LAMB2/VEGFC/COL6A2/CAV1/FLNA/IBSP/CAV2/FGR/HCK/ITGA5/COMP/COL1A2/COL5A2/FYN/COL1A1/TNC/THBS2/SPP1
WP_VITAMIN_B12_METABOLISM	WP_VITAMIN_B12_METABOLISM	WP_VITAMIN_B12_METABOLISM	44	-0.611725	-1.95495	6.59081e-05	0.00123402	0.000983495	1985	tags=34%, list=12%, signal=30%	TNF/SOD1/NFKB2/SERPINA3/SHMT2/IFNG/SOD2/CCL5/ICAM1/IL1B/SERPINE1/TCN1/CCL2/APOE/IL6
KEGG_NOD_LIKE_RECEPTOR_SIGNALING_PATHWAY	KEGG_NOD_LIKE_RECEPTOR_SIGNALING_PATHWAY	KEGG_NOD_LIKE_RECEPTOR_SIGNALING_PATHWAY	60	-0.571666	-1.95013	6.8625e-05	0.00127685	0.00101764	2190	tags=35%, list=14%, signal=30%	NLRC4/MAPK11/TNF/CXCL2/PSTPIP1/NLRP3/IL18/HSP90B1/RIPK2/CARD6/HSP90AA1/BIRC3/CCL7/CCL13/CCL5/CXCL1/IL1B/CCL2/IL6/CCL8/CXCL8
REACTOME_SCAVENGING_BY_CLASS_A_RECEPTORS	REACTOME_SCAVENGING_BY_CLASS_A_RECEPTORS	REACTOME_SCAVENGING_BY_CLASS_A_RECEPTORS	19	-0.773074	-2.05274	7.02282e-05	0.00129857	0.00103494	1405	tags=58%, list=9%, signal=53%	COL4A2/HSP90B1/FTH1/COL4A1/COLEC12/COL3A1/MSR1/COL1A2/COL1A1/MARCO/APOE
KEGG_MEDICUS_VARIANT_MUTATION_INACTIVATED_VCP_TO_26S_PROTEASOME_MEDIATED_PROTEIN_DEGRADATION	KEGG_MEDICUS_VARIANT_MUTATION_INACTIVATED_VCP_TO_26S_PROTEASOME_MEDIATED_PROTEIN_DEGRADATION	KEGG_MEDICUS_VARIANT_MUTATION_INACTIVATED_VCP_TO_26S_PROTEASOME_MEDIATED_PROTEIN_DEGRADATION	38	-0.63562	-1.95969	7.07148e-05	0.00129949	0.00103568	3568	tags=61%, list=22%, signal=47%	PSMA5/PSMC5/PSMD13/UBB/PSMB4/PSMB2/PSMD1/PSMD12/PSMA4/UBA52/PSMD14/PSMA3/PSMA1/PSMD8/PSMB3/PSMD9/PSMC4/PSMD2/PSMC1/PSMC3/PSMB5/PSMC6/PSMB6
BIOCARTA_NUCLEARRS_PATHWAY	BIOCARTA_NUCLEARRS_PATHWAY	BIOCARTA_NUCLEARRS_PATHWAY	33	0.674572	1.89392	7.1224e-05	0.00130082	0.00103674	2060	tags=36%, list=13%, signal=32%	NR1I2/CYP2B6/ABCB1/PPARG/ABCG1/PPARA/NR0B2/VDR/ABCC3/NR1H4/CYP3A4/ABCC2
KEGG_ASTHMA	KEGG_ASTHMA	KEGG_ASTHMA	25	-0.71524	-1.97932	7.37147e-05	0.0013381	0.00106645	1483	tags=44%, list=9%, signal=40%	TNF/HLA-DOA/CD40/HLA-DPB1/HLA-DQA1/HLA-DQB1/HLA-DMB/HLA-DPA1/HLA-DMA/HLA-DRA/FCER1G
PID_CXCR4_PATHWAY	PID_CXCR4_PATHWAY	PID_CXCR4_PATHWAY	98	-0.485095	-1.80719	7.45166e-05	0.00134446	0.00107152	2498	tags=36%, list=15%, signal=30%	ITGB1/PIK3R3/GNG2/ITGA1/GNAZ/ITGA7/PIK3CG/CD3E/ITGA4/CD4/CD3D/ITGA11/AKT1/PIK3CD/STAT2/ITGAV/GNAI3/CD247/PIK3R5/ITGA3/RGS1/JAK2/GNAI2/LYN/PTPRC/DNM1/STAT1/FGR/HCK/ITGA5/FYN/LCK/MMP9/HLA-DRA/CXCR4
WP_OVERVIEW_OF_NANOPARTICLE_EFFECTS	WP_OVERVIEW_OF_NANOPARTICLE_EFFECTS	WP_OVERVIEW_OF_NANOPARTICLE_EFFECTS	19	-0.768616	-2.04091	8.39006e-05	0.00150465	0.00119919	1985	tags=53%, list=12%, signal=46%	TNF/PIK3CD/HMOX1/AKT3/COL4A1/FN1/CDH3/IL6/PTGS2/CXCL8
REACTOME_SCF_SKP2_MEDIATED_DEGRADATION_OF_P27_P21	REACTOME_SCF_SKP2_MEDIATED_DEGRADATION_OF_P27_P21	REACTOME_SCF_SKP2_MEDIATED_DEGRADATION_OF_P27_P21	57	-0.573945	-1.94113	8.60516e-05	0.00153399	0.00122257	3568	tags=56%, list=22%, signal=44%	PSMA5/PSMC5/PSMD13/UBB/PSMB4/PSMB2/PSMB10/PSMD1/PSMD12/PSMA4/UBA52/CCNE2/PSMD14/PSMA3/PSMA1/SKP2/PSMD8/CCND1/PSMB3/PSMD9/PSMC4/PSMD2/PSMC1/PSMC3/CKS1B/PSMB8/CCNA2/PSMB5/PSME1/PSMC6/PSMB6/PSMB9
REACTOME_PEROXISOMAL_PROTEIN_IMPORT	REACTOME_PEROXISOMAL_PROTEIN_IMPORT	REACTOME_PEROXISOMAL_PROTEIN_IMPORT	60	0.593331	1.90729	8.93597e-05	0.00158348	0.00126201	3029	tags=42%, list=19%, signal=34%	PHYH/ACOX2/EPHX2/AMACR/ACOX1/PIPOX/DDO/ACOT8/ZFAND6/CAT/NUDT7/SLC27A2/USP9X/DECR2/CROT/PECR/EHHADH/MLYCD/HSD17B4/NUDT19/PEX26/AGXT/TYSND1/SCP2/ACAA1
KEGG_MEDICUS_PATHOGEN_HTLV_1_TAX_TO_NFY_MEDIATED_TRANSCRIPTION	KEGG_MEDICUS_PATHOGEN_HTLV_1_TAX_TO_NFY_MEDIATED_TRANSCRIPTION	KEGG_MEDICUS_PATHOGEN_HTLV_1_TAX_TO_NFY_MEDIATED_TRANSCRIPTION	10	-0.864482	-1.94933	9.10248e-05	0.00160344	0.00127792	535	tags=80%, list=3%, signal=77%	HLA-DOA/HLA-DPB1/HLA-DQA1/HLA-DQB1/HLA-DMB/HLA-DPA1/HLA-DMA/HLA-DRA
REACTOME_ION_CHANNEL_TRANSPORT	REACTOME_ION_CHANNEL_TRANSPORT	REACTOME_ION_CHANNEL_TRANSPORT	175	0.456302	1.72998	9.2515e-05	0.0016201	0.0012912	2094	tags=21%, list=13%, signal=19%	SGK2/ATP10B/CLCA1/ATP9A/ANO9/SCNN1B/CLCA4/TRPM6/WNK4/WNK2/BEST2/TRPM4/CLCN2/FXYD3/SCNN1A/ATP1A1/ATP2C2/SRI/WWP1/ANO10/ATP8B1/NEDD4L/ATP6V1C2/ANO7/ATP2A3/ATP1B1/RIPK3/ATP7B/CLCN7/TRPC4AP/TRPM7/SCNN1G/ATP7A/CLCN3/TPCN1/CLCN5/TRPA1
REACTOME_CHONDROITIN_SULFATE_BIOSYNTHESIS	REACTOME_CHONDROITIN_SULFATE_BIOSYNTHESIS	REACTOME_CHONDROITIN_SULFATE_BIOSYNTHESIS	20	-0.752262	-1.98739	9.59674e-05	0.00167073	0.00133155	1476	tags=60%, list=9%, signal=55%	CSPG4/CHPF/CHST7/CHSY3/CHSY1/CHST3/CSGALNACT2/DCN/CHST15/VCAN/CHST11/BGN
WP_PEPTIDE_GPCRS	WP_PEPTIDE_GPCRS	WP_PEPTIDE_GPCRS	70	-0.533976	-1.88002	9.65407e-05	0.00167094	0.00133172	1638	tags=21%, list=10%, signal=19%	CCR2/CXCR1/ACKR1/EDNRA/AVPR1A/CCR5/CXCR2/NTSR1/FPR2/C3AR1/CCR1/FPR3/FPR1/C5AR1/CXCR4
KEGG_INTESTINAL_IMMUNE_NETWORK_FOR_IGA_PRODUCTION	KEGG_INTESTINAL_IMMUNE_NETWORK_FOR_IGA_PRODUCTION	KEGG_INTESTINAL_IMMUNE_NETWORK_FOR_IGA_PRODUCTION	43	-0.607414	-1.9365	0.00010197	0.00175471	0.00139848	1745	tags=42%, list=11%, signal=37%	CD80/ICOS/IL15RA/HLA-DOA/IL15/CD40/HLA-DPB1/HLA-DQA1/HLA-DQB1/TGFB1/HLA-DMB/CD86/HLA-DPA1/HLA-DMA/TNFSF13B/HLA-DRA/CXCR4/IL6
REACTOME_CROSSLINKING_OF_COLLAGEN_FIBRILS	REACTOME_CROSSLINKING_OF_COLLAGEN_FIBRILS	REACTOME_CROSSLINKING_OF_COLLAGEN_FIBRILS	18	-0.76249	-1.98225	0.000103829	0.00177643	0.00141579	1936	tags=56%, list=12%, signal=49%	LOXL3/COL4A2/LOXL2/COL4A1/PXDN/PCOLCE/COL1A2/COL1A1/LOXL1/LOX
REACTOME_INTERLEUKIN_6_FAMILY_SIGNALING	REACTOME_INTERLEUKIN_6_FAMILY_SIGNALING	REACTOME_INTERLEUKIN_6_FAMILY_SIGNALING	23	-0.723785	-1.99726	0.000105342	0.00178814	0.00142513	1269	tags=35%, list=8%, signal=32%	LIF/JAK2/SOCS3/IL11/OSMR/STAT1/OSM/IL6
WP_DRUG_INDUCTION_OF_BILE_ACID_PATHWAY	WP_DRUG_INDUCTION_OF_BILE_ACID_PATHWAY	WP_DRUG_INDUCTION_OF_BILE_ACID_PATHWAY	17	0.778648	1.91613	0.000105734	0.00178814	0.00142513	2060	tags=53%, list=13%, signal=46%	NR1I2/SLC51B/ABCB1/SLC51A/VDR/ABCC3/NR1H4/CYP3A4/ABCC2
KEGG_MEDICUS_REFERENCE_ORIGIN_UNWINDING_AND_ELONGATION	KEGG_MEDICUS_REFERENCE_ORIGIN_UNWINDING_AND_ELONGATION	KEGG_MEDICUS_REFERENCE_ORIGIN_UNWINDING_AND_ELONGATION	30	-0.66934	-1.94345	0.000106798	0.00178814	0.00142513	3464	tags=70%, list=21%, signal=55%	POLE3/RFC1/PRIM1/GINS4/MCM7/RFC5/PRIM2/RFC4/MCM3/RFC2/RPA1/MCM6/GINS3/RPA2/MCM2/MCM5/MCM4/CDC45/POLE2/MCM10/WDHD1
KEGG_MEDICUS_VARIANT_MUTATION_INACTIVATED_UBQLN2_TO_26S_PROTEASOME_MEDIATED_PROTEIN_DEGRADATION	KEGG_MEDICUS_VARIANT_MUTATION_INACTIVATED_UBQLN2_TO_26S_PROTEASOME_MEDIATED_PROTEIN_DEGRADATION	KEGG_MEDICUS_VARIANT_MUTATION_INACTIVATED_UBQLN2_TO_26S_PROTEASOME_MEDIATED_PROTEIN_DEGRADATION	38	-0.62691	-1.93283	0.000107045	0.00178814	0.00142513	3568	tags=61%, list=22%, signal=47%	PSMA5/PSMC5/PSMD13/UBB/PSMB4/PSMB2/PSMD1/PSMD12/PSMA4/UBA52/PSMD14/PSMA3/PSMA1/PSMD8/PSMB3/PSMD9/PSMC4/PSMD2/PSMC1/PSMC3/PSMB5/PSMC6/PSMB6
WP_PATHOGENESIS_OF_SARS_COV_2_MEDIATED_BY_NSP9_NSP10_COMPLEX	WP_PATHOGENESIS_OF_SARS_COV_2_MEDIATED_BY_NSP9_NSP10_COMPLEX	WP_PATHOGENESIS_OF_SARS_COV_2_MEDIATED_BY_NSP9_NSP10_COMPLEX	19	-0.763248	-2.02665	0.000107517	0.00178814	0.00142513	2105	tags=53%, list=13%, signal=46%	CD3E/CD4/CD247/CD2/CD8A/FYN/LCK/HLA-DRA/IL6/CXCL8
KEGG_MEDICUS_ENV_FACTOR_IRON_TO_ANTEROGRADE_AXONAL_TRANSPORT	KEGG_MEDICUS_ENV_FACTOR_IRON_TO_ANTEROGRADE_AXONAL_TRANSPORT	KEGG_MEDICUS_ENV_FACTOR_IRON_TO_ANTEROGRADE_AXONAL_TRANSPORT	15	-0.793533	-1.98352	0.000109038	0.00180336	0.00143726	2082	tags=60%, list=13%, signal=52%	TUBB3/TUBA4A/TUBA1C/TUBB/TUBB2B/TUBA1B/TUBA1A/TUBB2A/TUBB6
WP_INTERACTIONS_OF_NATURAL_KILLER_CELLS_IN_PANCREATIC_CANCER	WP_INTERACTIONS_OF_NATURAL_KILLER_CELLS_IN_PANCREATIC_CANCER	WP_INTERACTIONS_OF_NATURAL_KILLER_CELLS_IN_PANCREATIC_CANCER	22	-0.736832	-1.98407	0.000111462	0.00183328	0.0014611	1985	tags=55%, list=12%, signal=48%	TNF/MICA/GZMB/CD96/TIGIT/CSF2/IFNG/CCL5/PRF1/MICB/CCL2/CCL4
KEGG_MEDICUS_VARIANT_SCRAPIE_CONFORMATION_PRPSC_TO_26S_PROTEASOME_MEDIATED_PROTEIN_DEGRADATION	KEGG_MEDICUS_VARIANT_SCRAPIE_CONFORMATION_PRPSC_TO_26S_PROTEASOME_MEDIATED_PROTEIN_DEGRADATION	KEGG_MEDICUS_VARIANT_SCRAPIE_CONFORMATION_PRPSC_TO_26S_PROTEASOME_MEDIATED_PROTEIN_DEGRADATION	34	-0.657857	-1.97977	0.000112493	0.00184006	0.00146651	3568	tags=65%, list=22%, signal=51%	PSMA5/PSMC5/PSMD13/PSMB4/PSMB2/PSMD1/PSMD12/PSMA4/PSMD14/PSMA3/PSMA1/PSMD8/PSMB3/PSMD9/PSMC4/PSMD2/PSMC1/PSMC3/PSMB5/PSMC6/PSMB6/PRNP
PID_IL27_PATHWAY	PID_IL27_PATHWAY	PID_IL27_PATHWAY	26	-0.69628	-1.96989	0.000115064	0.00187183	0.00149183	2904	tags=62%, list=18%, signal=51%	IL6ST/TBX21/STAT4/IL12RB1/IL27RA/IL12RB2/TNF/STAT2/IL18/GATA3/JAK2/IFNG/TGFB1/STAT1/IL1B/IL6
BIOCARTA_BLYMPHOCYTE_PATHWAY	BIOCARTA_BLYMPHOCYTE_PATHWAY	BIOCARTA_BLYMPHOCYTE_PATHWAY	10	-0.858403	-1.93562	0.000127217	0.00205829	0.00164043	2159	tags=90%, list=13%, signal=78%	CR1/CD80/ITGAL/CD40/PTPRC/ICAM1/FCGR2B/ITGB2/HLA-DRA
PID_INTEGRIN_A9B1_PATHWAY	PID_INTEGRIN_A9B1_PATHWAY	PID_INTEGRIN_A9B1_PATHWAY	24	-0.707359	-1.9623	0.000128804	0.00207271	0.00165192	2498	tags=62%, list=15%, signal=53%	ITGB1/NOS2/F13A1/TGM2/ADAM15/KCNJ15/CSF2/CSF2RA/FN1/VCAM1/VEGFC/ADAM8/ADAM12/TNC/SPP1
PID_AP1_PATHWAY	PID_AP1_PATHWAY	PID_AP1_PATHWAY	69	-0.534432	-1.87865	0.000131475	0.0021043	0.0016771	1526	tags=29%, list=9%, signal=26%	FABP4/ETS1/NR3C1/CSF2/CDKN2A/NFATC1/IFNG/HIF1A/GJA1/TGFB1/TIMP1/COL1A2/FOSL1/MMP9/PLAU/CCL2/MT2A/IL6/CXCL8/MMP1
WP_NUCLEAR_RECEPTORS_IN_LIPID_METABOLISM_AND_TOXICITY	WP_NUCLEAR_RECEPTORS_IN_LIPID_METABOLISM_AND_TOXICITY	WP_NUCLEAR_RECEPTORS_IN_LIPID_METABOLISM_AND_TOXICITY	33	0.664389	1.86533	0.000133141	0.00211958	0.00168928	2060	tags=33%, list=13%, signal=29%	NR1I2/CYP2B6/ABCB1/PPARG/ABCG1/PPARA/VDR/ABCC3/NR1H4/CYP3A4/ABCC2
REACTOME_G1_S_DNA_DAMAGE_CHECKPOINTS	REACTOME_G1_S_DNA_DAMAGE_CHECKPOINTS	REACTOME_G1_S_DNA_DAMAGE_CHECKPOINTS	63	-0.549471	-1.89096	0.000151619	0.00240091	0.00191349	3568	tags=52%, list=22%, signal=41%	PSMA5/PSMC5/PSMD13/UBB/PSMB4/PSMB2/PSMB10/PSMD1/PSMD12/PSMA4/UBA52/CCNE2/MDM2/CHEK1/PSMD14/PSMA3/PSMA1/PSMD8/PSMB3/PSMD9/PSMC4/PSMD2/PSMC1/PSMC3/PSMB8/CCNA2/PSMB5/ZNF385A/PSME1/PSMC6/CDKN2A/PSMB6/PSMB9
REACTOME_DOWNSTREAM_SIGNALING_EVENTS_OF_B_CELL_RECEPTOR_BCR	REACTOME_DOWNSTREAM_SIGNALING_EVENTS_OF_B_CELL_RECEPTOR_BCR	REACTOME_DOWNSTREAM_SIGNALING_EVENTS_OF_B_CELL_RECEPTOR_BCR	76	-0.518349	-1.86367	0.000156104	0.00244945	0.00195218	3568	tags=51%, list=22%, signal=40%	PSMA5/PSMC5/PSMD13/UBB/NFKBIA/PSMB4/CHUK/PSMB2/PPP3CB/PSMB10/PSMD1/PSMD12/PSMA4/UBA52/PPP3CA/PRKCB/PSMD14/PSMA3/PSMA1/NFKBIE/PPP3R1/PSMD8/PSMB3/PSMD9/PSMC4/MALT1/PSMD2/PSMC1/PSMC3/PSMB8/RASGRP3/PSMB5/HRAS/PSME1/PSMC6/NFATC1/PSMB6/RASGRP1/PSMB9
KEGG_MEDICUS_VARIANT_MUTATION_CAUSED_ABERRANT_SNCA_TO_26S_PROTEASOME_MEDIATED_PROTEIN_DEGRADATION	KEGG_MEDICUS_VARIANT_MUTATION_CAUSED_ABERRANT_SNCA_TO_26S_PROTEASOME_MEDIATED_PROTEIN_DEGRADATION	KEGG_MEDICUS_VARIANT_MUTATION_CAUSED_ABERRANT_SNCA_TO_26S_PROTEASOME_MEDIATED_PROTEIN_DEGRADATION	34	-0.649915	-1.95587	0.000156331	0.00244945	0.00195218	3568	tags=65%, list=22%, signal=51%	PSMA5/SNCA/PSMC5/PSMD13/PSMB4/PSMB2/PSMD1/PSMD12/PSMA4/PSMD14/PSMA3/PSMA1/PSMD8/PSMB3/PSMD9/PSMC4/PSMD2/PSMC1/PSMC3/PSMB5/PSMC6/PSMB6
REACTOME_GENERATION_OF_SECOND_MESSENGER_MOLECULES	REACTOME_GENERATION_OF_SECOND_MESSENGER_MOLECULES	REACTOME_GENERATION_OF_SECOND_MESSENGER_MOLECULES	28	-0.666516	-1.92161	0.000167049	0.00260368	0.0020751	2241	tags=50%, list=14%, signal=43%	PLCG2/ITK/CD3E/CD4/CD3D/CD247/EVL/HLA-DPB1/HLA-DQA1/HLA-DQB1/LCP2/HLA-DPA1/LCK/HLA-DRA
REACTOME_COSTIMULATION_BY_THE_CD28_FAMILY	REACTOME_COSTIMULATION_BY_THE_CD28_FAMILY	REACTOME_COSTIMULATION_BY_THE_CD28_FAMILY	64	-0.536868	-1.84368	0.000170253	0.00263981	0.00210389	2511	tags=41%, list=16%, signal=34%	CD3G/PPP2R5C/CD28/PIK3R3/THEM4/CD3E/CD4/CD3D/AKT1/CD80/ICOS/CD247/AKT3/CTLA4/MAP3K8/PDCD1LG2/LYN/HLA-DPB1/HLA-DQA1/HLA-DQB1/CD274/CD86/HLA-DPA1/FYN/LCK/HLA-DRA
REACTOME_MET_PROMOTES_CELL_MOTILITY	REACTOME_MET_PROMOTES_CELL_MOTILITY	REACTOME_MET_PROMOTES_CELL_MOTILITY	41	-0.604685	-1.90475	0.000173229	0.00267203	0.00212958	2498	tags=44%, list=15%, signal=37%	ITGB1/COL24A1/LAMA4/LAMC1/LAMC2/ITGA3/LAMA5/TNS4/LAMA2/COL5A3/FN1/LAMB2/COL5A1/COL3A1/COL1A2/COL5A2/COL1A1/COL11A1
REACTOME_NUCLEAR_RECEPTOR_TRANSCRIPTION_PATHWAY	REACTOME_NUCLEAR_RECEPTOR_TRANSCRIPTION_PATHWAY	REACTOME_NUCLEAR_RECEPTOR_TRANSCRIPTION_PATHWAY	52	0.589423	1.83816	0.00018283	0.00277379	0.00221067	3060	tags=44%, list=19%, signal=36%	NR1I2/PPARG/NR3C2/HNF4A/RORC/NR6A1/PPARA/ESRRA/NR0B2/NR5A2/VDR/NR1D2/NR1H4/NR4A1/HNF4G/ESRRG/THRB/RXRA/RARG/NR2F6/NCOR2/THRA/RARA
KEGG_MEDICUS_REFERENCE_26S_PROTEASOME_MEDIATED_PROTEIN_DEGRADATION	KEGG_MEDICUS_REFERENCE_26S_PROTEASOME_MEDIATED_PROTEIN_DEGRADATION	KEGG_MEDICUS_REFERENCE_26S_PROTEASOME_MEDIATED_PROTEIN_DEGRADATION	37	-0.63942	-1.95622	0.000182935	0.00277379	0.00221067	3568	tags=62%, list=22%, signal=49%	PSMA5/PSMC5/PSMD13/UBB/PSMB4/PSMB2/PSMD1/PSMD12/PSMA4/UBA52/PSMD14/PSMA3/PSMA1/PSMD8/PSMB3/PSMD9/PSMC4/PSMD2/PSMC1/PSMC3/PSMB5/PSMC6/PSMB6
BIOCARTA_TCYTOTOXIC_PATHWAY	BIOCARTA_TCYTOTOXIC_PATHWAY	BIOCARTA_TCYTOTOXIC_PATHWAY	12	-0.822939	-1.93281	0.000183679	0.00277379	0.00221067	2872	tags=100%, list=18%, signal=82%	CD28/CD3E/CD3D/ITGAL/CD247/CD2/CD8A/PTPRC/THY1/ICAM1/ITGB2
BIOCARTA_THELPER_PATHWAY	BIOCARTA_THELPER_PATHWAY	BIOCARTA_THELPER_PATHWAY	12	-0.822939	-1.93281	0.000183679	0.00277379	0.00221067	2872	tags=100%, list=18%, signal=82%	CD28/CD3E/CD4/CD3D/ITGAL/CD247/CD2/PTPRC/THY1/ICAM1/ITGB2
BIOCARTA_GRANULOCYTES_PATHWAY	BIOCARTA_GRANULOCYTES_PATHWAY	BIOCARTA_GRANULOCYTES_PATHWAY	15	-0.782903	-1.95695	0.000184484	0.00277379	0.00221067	2663	tags=87%, list=16%, signal=72%	IL1A/SELP/ICAM2/TNF/ITGAL/SELPLG/PECAM1/IFNG/SELL/ICAM1/ITGB2/ITGAM/CXCL8
REACTOME_PHASE_I_FUNCTIONALIZATION_OF_COMPOUNDS	REACTOME_PHASE_I_FUNCTIONALIZATION_OF_COMPOUNDS	REACTOME_PHASE_I_FUNCTIONALIZATION_OF_COMPOUNDS	95	0.514902	1.7927	0.000187612	0.00280664	0.00223685	1280	tags=24%, list=8%, signal=22%	ADH1C/CYP2B6/AOC1/CYP4F2/CYP2W1/CYP4F12/CES3/ADH6/CYP39A1/CES2/ACSS2/CYP27A1/CYP3A5/ACSS1/MAOA/ALDH1B1/CYP2S1/CYP4F3/ALDH2/CYP4F11/CYP2D6/NR1H4/CYP2J2
REACTOME_DRUG_ADME	REACTOME_DRUG_ADME	REACTOME_DRUG_ADME	88	0.526368	1.80527	0.000190315	0.00283284	0.00225774	1251	tags=20%, list=8%, signal=19%	VAV3/PCK1/HSD11B2/UGT2B17/UGT2A3/NAT2/ABCB1/GGT7/GGT6/SERPINA6/CES2/XDH/UGT2B15/SULT1A1/SLC22A3/ABCC5/ABCC3/CYP2D6
REACTOME_CREATION_OF_C4_AND_C2_ACTIVATORS	REACTOME_CREATION_OF_C4_AND_C2_ACTIVATORS	REACTOME_CREATION_OF_C4_AND_C2_ACTIVATORS	14	-0.808241	-1.97941	0.000194817	0.00288542	0.00229964	686	tags=43%, list=4%, signal=41%	C1R/FCN1/C1S/C1QA/C1QC/C1QB
BIOCARTA_STEM_PATHWAY	BIOCARTA_STEM_PATHWAY	BIOCARTA_STEM_PATHWAY	15	-0.781679	-1.95389	0.000196866	0.00290133	0.00231233	1902	tags=40%, list=12%, signal=35%	CD4/CSF2/CD8A/IL11/IL6/CXCL8
REACTOME_MISCELLANEOUS_SUBSTRATES	REACTOME_MISCELLANEOUS_SUBSTRATES	REACTOME_MISCELLANEOUS_SUBSTRATES	11	0.85793	1.89906	0.000202382	0.00296794	0.00236541	1251	tags=55%, list=8%, signal=50%	CYP4F2/CYP2W1/CYP2S1/CYP4F3/CYP4F11/CYP2D6
WP_PARKIN_UBIQUITIN_PROTEASOMAL_SYSTEM_PATHWAY	WP_PARKIN_UBIQUITIN_PROTEASOMAL_SYSTEM_PATHWAY	WP_PARKIN_UBIQUITIN_PROTEASOMAL_SYSTEM_PATHWAY	62	-0.530651	-1.81741	0.000207854	0.00303325	0.00241746	3446	tags=45%, list=21%, signal=36%	SNCA/PSMC5/PSMD13/PSMD1/PSMD12/UBE2G1/PSMD14/HSPA4/PSMD8/TUBB3/TUBA4A/PSMD9/PSMC4/HSPA5/PSMD2/PSMC1/TUBA1C/PSMC3/HSPA2/TUBB/TUBB2B/TUBA1B/PSMC6/TUBA1A/TUBB2A/HSPA6/UBE2L6/TUBB6
BIOCARTA_NKT_PATHWAY	BIOCARTA_NKT_PATHWAY	BIOCARTA_NKT_PATHWAY	25	-0.692235	-1.91565	0.000209555	0.00304314	0.00242535	2719	tags=52%, list=17%, signal=43%	IL12RB1/CD28/IL12RB2/TGFB2/CD4/CSF2/CCR5/IFNG/TGFB3/TGFB1/CCR1/CXCR4/CCL4
WP_TYPE_I_COLLAGEN_SYNTHESIS_IN_THE_CONTEXT_OF_OSTEOGENESIS_IMPERFECTA	WP_TYPE_I_COLLAGEN_SYNTHESIS_IN_THE_CONTEXT_OF_OSTEOGENESIS_IMPERFECTA	WP_TYPE_I_COLLAGEN_SYNTHESIS_IN_THE_CONTEXT_OF_OSTEOGENESIS_IMPERFECTA	29	-0.665923	-1.92898	0.000211243	0.00305187	0.0024323	2231	tags=52%, list=14%, signal=45%	P4HB/FZD1/COLGALT1/PPIB/P4HA1/TNFRSF11B/PLOD1/FKBP10/SERPINH1/SERPINF1/CREB3L1/COL1A2/COL1A1/ADAMTS2/LOX
PID_IL12_STAT4_PATHWAY	PID_IL12_STAT4_PATHWAY	PID_IL12_STAT4_PATHWAY	32	-0.645329	-1.91201	0.000212206	0.00305187	0.0024323	3301	tags=72%, list=20%, signal=57%	TBX21/PPP3CB/PPP3CA/STAT4/CD3G/CD28/PPP3R1/FOS/CD3E/PIAS2/CD4/CD3D/CD80/CD247/IL18/IRF1/IL2RA/IFNG/TGFB1/CD86/PRF1/ETV5/HLA-DRA
WP_IL1_AND_MEGAKARYOCYTES_IN_OBESITY	WP_IL1_AND_MEGAKARYOCYTES_IN_OBESITY	WP_IL1_AND_MEGAKARYOCYTES_IN_OBESITY	24	-0.695406	-1.92914	0.000217252	0.00310942	0.00247817	1456	tags=62%, list=9%, signal=57%	NLRP3/IL18/F2R/IL1R1/IFNG/TLR1/PLA2G7/TLR2/TIMP2/TIMP1/ICAM1/MMP9/IL1B/CCL2/S100A9
WP_AEROBIC_GLYCOLYSIS	WP_AEROBIC_GLYCOLYSIS	WP_AEROBIC_GLYCOLYSIS	12	-0.817816	-1.92078	0.000220661	0.00313996	0.00250251	2780	tags=92%, list=17%, signal=76%	HK1/TPI1/PGK1/PGAM2/LDHA/GPI/ALDOA/GAPDH/PKM/ENO1/SLC2A1
WP_TH17_CELL_DIFFERENTIATION_PATHWAY	WP_TH17_CELL_DIFFERENTIATION_PATHWAY	WP_TH17_CELL_DIFFERENTIATION_PATHWAY	65	-0.533813	-1.84236	0.000221496	0.00313996	0.00250251	2918	tags=45%, list=18%, signal=37%	PPP3CA/CD3G/NFIL3/IL27RA/SMAD2/FOS/CD3E/CD4/CD3D/IL23A/TGFBR1/CD247/CRY1/IL21R/GATA3/AHR/HSP90AA1/NFATC1/JAK2/IL2RA/IFNG/HIF1A/SOCS3/TGFB1/STAT1/HLA-DMA/LCK/IL1B/IL6
PID_RHOA_REG_PATHWAY	PID_RHOA_REG_PATHWAY	PID_RHOA_REG_PATHWAY	45	0.618674	1.87479	0.000242059	0.00341521	0.00272188	2388	tags=42%, list=15%, signal=36%	VAV3/PLEKHG6/FARP1/NGEF/ARHGEF10L/ARHGEF5/MCF2L/OPHN1/ARAP1/ABR/ARHGEF1/ARHGEF18/VAV2/CDKN1B/ARHGEF11/TRIO/AKAP13/ARAP3/NET1
WP_PHOSPHOINOSITIDES_METABOLISM	WP_PHOSPHOINOSITIDES_METABOLISM	WP_PHOSPHOINOSITIDES_METABOLISM	46	0.604476	1.84025	0.000246856	0.00345346	0.00275237	1268	tags=22%, list=8%, signal=20%	PLCB4/MTMR11/INPP5D/PIP5K1B/PLCG1/PLCD1/OCRL/PLCE1/PLCB1/PIK3C2B
REACTOME_IRAK4_DEFICIENCY_TLR2_4	REACTOME_IRAK4_DEFICIENCY_TLR2_4	REACTOME_IRAK4_DEFICIENCY_TLR2_4	18	-0.745138	-1.93714	0.00024709	0.00345346	0.00275237	457	tags=33%, list=3%, signal=32%	TLR1/TLR2/CD14/LY96/S100A9/S100A8
BIOCARTA_CTL_PATHWAY	BIOCARTA_CTL_PATHWAY	BIOCARTA_CTL_PATHWAY	13	-0.810393	-1.93748	0.000248867	0.00346205	0.00275921	2872	tags=85%, list=18%, signal=70%	CD3G/FASLG/CD3E/CD3D/GZMB/ITGAL/CD247/FAS/PRF1/ICAM1/ITGB2
BIOCARTA_CYTOKINE_PATHWAY	BIOCARTA_CYTOKINE_PATHWAY	BIOCARTA_CYTOKINE_PATHWAY	19	-0.746319	-1.9817	0.00025107	0.00347644	0.00277068	3046	tags=47%, list=19%, signal=38%	TXLNA/IL1A/IL10/TNF/IL18/IL15/IFNG/IL6/CXCL8
WP_PREGNANE_X_RECEPTOR_PATHWAY	WP_PREGNANE_X_RECEPTOR_PATHWAY	WP_PREGNANE_X_RECEPTOR_PATHWAY	28	0.688101	1.88199	0.000262642	0.00361983	0.00288496	2328	tags=50%, list=14%, signal=43%	NR1I2/CYP2B6/ABCB1/CYP4F12/CYP3A5/PPARGC1A/NCOA3/ABCC3/NRIP1/SRC/CYP3A4/ABCC2/RXRA/NCOA2
REACTOME_MOLECULES_ASSOCIATED_WITH_ELASTIC_FIBRES	REACTOME_MOLECULES_ASSOCIATED_WITH_ELASTIC_FIBRES	REACTOME_MOLECULES_ASSOCIATED_WITH_ELASTIC_FIBRES	35	-0.627736	-1.88639	0.000265923	0.00364817	0.00290754	2498	tags=51%, list=15%, signal=44%	ITGB1/FBLN5/TGFB2/LTBP2/LTBP3/BMP4/ITGAV/EMILIN2/EFEMP1/MFAP5/EMILIN1/MFAP2/FN1/EFEMP2/TGFB3/FBLN2/TGFB1/FBN1
KEGG_ASCORBATE_AND_ALDARATE_METABOLISM	KEGG_ASCORBATE_AND_ALDARATE_METABOLISM	KEGG_ASCORBATE_AND_ALDARATE_METABOLISM	14	0.812387	1.89815	0.000267615	0.00365455	0.00291263	813	tags=36%, list=5%, signal=34%	UGT2B17/UGT2A3/UGT2B15/ALDH1B1/ALDH2
REACTOME_CHONDROITIN_SULFATE_DERMATAN_SULFATE_METABOLISM	REACTOME_CHONDROITIN_SULFATE_DERMATAN_SULFATE_METABOLISM	REACTOME_CHONDROITIN_SULFATE_DERMATAN_SULFATE_METABOLISM	50	-0.564403	-1.87366	0.000269964	0.00366979	0.00292477	3125	tags=52%, list=19%, signal=42%	CHST12/DSEL/CHST14/CSPG5/HSPG2/CSGALNACT1/B3GALT6/ARSB/CSPG4/GPC1/CHPF/CHST7/CHSY3/DSE/CHSY1/CHST3/GPC6/HYAL1/UST/CSGALNACT2/SDC2/DCN/CHST15/VCAN/CHST11/BGN
BIOCARTA_LAIR_PATHWAY	BIOCARTA_LAIR_PATHWAY	BIOCARTA_LAIR_PATHWAY	17	-0.753405	-1.94447	0.000293736	0.0039568	0.00315352	2663	tags=76%, list=16%, signal=64%	IL1A/SELP/ITGB1/ITGA4/TNF/ITGAL/SELPLG/VCAM1/C3/ICAM1/ITGB2/IL6/CXCL8
WP_CELLS_AND_MOLECULES_INVOLVED_IN_LOCAL_ACUTE_INFLAMMATORY_RESPONSE	WP_CELLS_AND_MOLECULES_INVOLVED_IN_LOCAL_ACUTE_INFLAMMATORY_RESPONSE	WP_CELLS_AND_MOLECULES_INVOLVED_IN_LOCAL_ACUTE_INFLAMMATORY_RESPONSE	17	-0.753405	-1.94447	0.000293736	0.0039568	0.00315352	2663	tags=76%, list=16%, signal=64%	IL1A/SELP/ITGB1/ITGA4/TNF/ITGAL/SELPLG/VCAM1/C3/ICAM1/ITGB2/IL6/CXCL8
BIOCARTA_IL17_PATHWAY	BIOCARTA_IL17_PATHWAY	BIOCARTA_IL17_PATHWAY	15	-0.772494	-1.93093	0.000301113	0.0040379	0.00321816	2105	tags=80%, list=13%, signal=70%	CD34/CSF3/CD3G/CD3E/CD4/CD3D/CD247/KITLG/CD2/CD8A/IL6/CXCL8
KEGG_MEDICUS_VARIANT_MUTATION_CAUSED_ABERRANT_HTT_TO_26S_PROTEASOME_MEDIATED_PROTEIN_DEGRADATION	KEGG_MEDICUS_VARIANT_MUTATION_CAUSED_ABERRANT_HTT_TO_26S_PROTEASOME_MEDIATED_PROTEIN_DEGRADATION	KEGG_MEDICUS_VARIANT_MUTATION_CAUSED_ABERRANT_HTT_TO_26S_PROTEASOME_MEDIATED_PROTEIN_DEGRADATION	34	-0.635556	-1.91266	0.000303818	0.00405591	0.00323251	3568	tags=62%, list=22%, signal=48%	PSMA5/PSMC5/PSMD13/PSMB4/PSMB2/PSMD1/PSMD12/PSMA4/PSMD14/PSMA3/PSMA1/PSMD8/PSMB3/PSMD9/PSMC4/PSMD2/PSMC1/PSMC3/PSMB5/PSMC6/PSMB6
PID_MYC_ACTIV_PATHWAY	PID_MYC_ACTIV_PATHWAY	PID_MYC_ACTIV_PATHWAY	74	-0.509042	-1.82456	0.00031054	0.00412713	0.00328927	2440	tags=35%, list=15%, signal=30%	MTA1/RUVBL1/LDHA/MYCT1/HSPA4/TAF12/RUVBL2/SNAI1/RCC1/NPM1/TAF4B/NME1/GAPDH/EIF2S1/BIRC5/HMGA1/TK1/HSP90AA1/ENO1/CCNB1/SLC2A1/PEG10/PMAIP1/FOSL1/MMP9/BCAT1
WP_METAPATHWAY_BIOTRANSFORMATION_PHASE_I_AND_II	WP_METAPATHWAY_BIOTRANSFORMATION_PHASE_I_AND_II	WP_METAPATHWAY_BIOTRANSFORMATION_PHASE_I_AND_II	158	0.441246	1.65605	0.000332424	0.00439834	0.00350542	1306	tags=20%, list=8%, signal=18%	UGT2B17/UGT2A3/NAT2/SULT1B1/CYP2B6/CYP4F2/CYP2W1/CYP4F12/GPX2/CYP39A1/GAL3ST2/FMO4/EPHX2/FMO5/CYP27A1/CYP3A5/UGT2B15/SULT1A1/AKR1B10/CYP2S1/CYP4F3/AKR1C3/GSS/CYP4X1/HNMT/CYP4F11/GAL3ST1/CYP2D6/CYP2J2/SULT1A2/SULT4A1
REACTOME_CYCLIN_A_CDK2_ASSOCIATED_EVENTS_AT_S_PHASE_ENTRY	REACTOME_CYCLIN_A_CDK2_ASSOCIATED_EVENTS_AT_S_PHASE_ENTRY	REACTOME_CYCLIN_A_CDK2_ASSOCIATED_EVENTS_AT_S_PHASE_ENTRY	82	-0.488421	-1.76702	0.000356905	0.00470135	0.00374692	3568	tags=55%, list=22%, signal=43%	PSMD3/CDC25B/LIN54/CDK2/PSMA5/PSMC5/PSMD13/UBB/LIN9/PSMB4/PSMB2/RBBP4/MAX/PSMB10/PSMD1/PSMD12/PSMA4/UBA52/CCNE2/CABLES1/PSMD14/PSMA3/PSMA1/SKP2/PSMD8/CCND1/PSMB3/LIN52/PSMD9/PSMC4/AKT1/PSMD2/PSMC1/PSMC3/TFDP1/CKS1B/PSMB8/CCNA2/AKT3/PSMB5/PSME1/MNAT1/PSMC6/PSMB6/PSMB9
REACTOME_GAP_JUNCTION_ASSEMBLY	REACTOME_GAP_JUNCTION_ASSEMBLY	REACTOME_GAP_JUNCTION_ASSEMBLY	31	-0.638392	-1.86764	0.000376501	0.00490606	0.00391007	2136	tags=55%, list=13%, signal=48%	GJC1/TUBB3/TUBA4A/TUBA1C/GJB6/GJA3/GJA4/TUBB2B/TUBA1B/GJA5/TUBA1A/TUBB2A/GJA1/GJB3/GJB2/TUBB6/GJB5
WP_THYROID_HORMONES_PRODUCTION_AND_PERIPHERAL_DOWNSTREAM_SIGNALING_EFFECTS	WP_THYROID_HORMONES_PRODUCTION_AND_PERIPHERAL_DOWNSTREAM_SIGNALING_EFFECTS	WP_THYROID_HORMONES_PRODUCTION_AND_PERIPHERAL_DOWNSTREAM_SIGNALING_EFFECTS	91	0.495262	1.71252	0.000377134	0.00490606	0.00391007	2556	tags=29%, list=16%, signal=24%	DUOX2/IYD/PPARG/DUOXA2/RPS6KA6/TG/PPARGC1A/SHH/MGLL/ITPR2/PFKFB2/NOTCH1/PLCB1/PAX8/SRC/TBC1D4/TSC2/THRB/WNT4/NHSL1/ADCY3/RXRA/PLIN1/SECISBP2L/PNPLA2/SOS1
REACTOME_THE_ROLE_OF_NEF_IN_HIV_1_REPLICATION_AND_DISEASE_PATHOGENESIS	REACTOME_THE_ROLE_OF_NEF_IN_HIV_1_REPLICATION_AND_DISEASE_PATHOGENESIS	REACTOME_THE_ROLE_OF_NEF_IN_HIV_1_REPLICATION_AND_DISEASE_PATHOGENESIS	28	-0.649795	-1.87341	0.000377389	0.00490606	0.00391007	2511	tags=43%, list=16%, signal=36%	CD28/AP2B1/CD4/AP2S1/AP1S2/AP2M1/CD247/DOCK2/AP1S3/HCK/FYN/LCK
WP_MIRNA_ROLE_IN_IMMUNE_RESPONSE_IN_SEPSIS	WP_MIRNA_ROLE_IN_IMMUNE_RESPONSE_IN_SEPSIS	WP_MIRNA_ROLE_IN_IMMUNE_RESPONSE_IN_SEPSIS	36	-0.626329	-1.90444	0.000380883	0.00492996	0.00392911	3228	tags=50%, list=20%, signal=40%	NFKBIA/CHUK/TLR7/IL1A/IL10/TRAF3/RELB/TNF/GZMB/NFKB2/IRF7/IRF1/VCAM1/TLR8/ICAM1/CCL4/IL6/CXCL8
PID_PTP1B_PATHWAY	PID_PTP1B_PATHWAY	PID_PTP1B_PATHWAY	52	-0.556383	-1.85762	0.000382915	0.0049348	0.00393297	934	tags=25%, list=6%, signal=24%	PDGFRB/JAK2/CSF1R/LYN/IRS1/SOCS3/NOX4/CAV1/FGR/HCK/FYN/FCGR2A/LCK
PID_ATF2_PATHWAY	PID_ATF2_PATHWAY	PID_ATF2_PATHWAY	56	-0.539541	-1.81696	0.000385012	0.00494043	0.00393746	2492	tags=38%, list=15%, signal=32%	COL24A1/NOS2/CBFB/FOS/CCND1/TGFB2/MAPK11/RUVBL2/IL23A/CCNA2/MMP2/CSRP2/IFNG/DUSP10/DUSP5/SOCS3/SELE/PLAU/IL6/SERPINB5/CXCL8
REACTOME_SLC_MEDIATED_TRANSMEMBRANE_TRANSPORT	REACTOME_SLC_MEDIATED_TRANSMEMBRANE_TRANSPORT	REACTOME_SLC_MEDIATED_TRANSMEMBRANE_TRANSPORT	234	0.402094	1.56689	0.000387836	0.00495531	0.00394932	2245	tags=24%, list=14%, signal=21%	SLC26A3/SLC26A2/SLC39A5/SLC13A2/SLC38A4/SLC5A1/SLC39A2/LCN15/SLC40A1/SLC1A7/SLC5A6/SLC2A8/SLC35D1/SLC3A1/SLC9A3/SLC9A2/SLC13A3/SLC6A6/SLC2A12/SLC44A4/HEPH/LCN12/SLC44A3/SLC22A3/SRI/SLC22A11/SLC30A2/SLC5A9/SLC35D2/SLC22A5/SLC9A8/SLC38A1/SLC11A2/SLC12A2/SLC35A3/SLC36A1/SLC38A3/SLC2A9/SLCO2A1/SLC35B3/SLC29A4/SLC6A19/SLC30A10/SLC26A1/SLC25A26/SLC44A5/SLC4A8/SLC39A4/SLC12A7/SLC44A1/SLC22A18/SLC30A1/SL…
BIOCARTA_MONOCYTE_PATHWAY	BIOCARTA_MONOCYTE_PATHWAY	BIOCARTA_MONOCYTE_PATHWAY	11	-0.822826	-1.90134	0.000398903	0.00507494	0.00404466	2873	tags=100%, list=18%, signal=82%	SELP/ITGB1/ITGA4/ITGAL/PECAM1/SELE/SELL/ICAM1/ITGB2/ITGAM
REACTOME_CLASS_I_MHC_MEDIATED_ANTIGEN_PROCESSING_PRESENTATION	REACTOME_CLASS_I_MHC_MEDIATED_ANTIGEN_PROCESSING_PRESENTATION	REACTOME_CLASS_I_MHC_MEDIATED_ANTIGEN_PROCESSING_PRESENTATION	360	-0.332728	-1.42823	0.000428151	0.00542385	0.00432274	3584	tags=30%, list=22%, signal=24%	THOP1/ITGB5/TRIM32/PSMA5/FBXW9/PSMC5/PSMD13/UBB/HLA-B/CDC23/RNF138/RBX1/DTX3L/PSMB4/CHUK/PSMB2/MEX3C/ANAPC10/FBXO30/PSMB10/PSMD1/PSMD12/CD36/HLA-G/PSMA4/FCGR1A/TLR6/UBE2G1/UBA52/RNF213/FBXO32/SEC61A1/UBE2E1/HLA-E/KLHL22/HLA-C/ASB4/CCNF/PSMD14/SMURF2/PSMA3/PSMA1/HERC6/CALR/UBE2F/BTK/TRIM37/SEC24A/SKP2/KBTBD6/SEC13/SEC61G/PSMD8/PSMB3/UBE2Q2/HLA-F/GLMN/HECW2/KLHL2/BLMH/PSMD9/MRC2/PSMC4/UBA6/TRIM69/H…
KEGG_MEDICUS_PATHOGEN_ESCHERICHIA_ESPG_TO_MICROTUBULE_RHOA_SIGNALING_PATHWAY	KEGG_MEDICUS_PATHOGEN_ESCHERICHIA_ESPG_TO_MICROTUBULE_RHOA_SIGNALING_PATHWAY	KEGG_MEDICUS_PATHOGEN_ESCHERICHIA_ESPG_TO_MICROTUBULE_RHOA_SIGNALING_PATHWAY	13	-0.797803	-1.90738	0.000430515	0.00543069	0.00432819	2082	tags=69%, list=13%, signal=60%	TUBB3/TUBA4A/TUBA1C/TUBB/TUBB2B/TUBA1B/TUBA1A/TUBB2A/TUBB6
KEGG_JAK_STAT_SIGNALING_PATHWAY	KEGG_JAK_STAT_SIGNALING_PATHWAY	KEGG_JAK_STAT_SIGNALING_PATHWAY	152	-0.410848	-1.61936	0.000433333	0.00544317	0.00433814	2598	tags=30%, list=16%, signal=25%	IFNE/IL12RB1/IRF9/SOCS4/IL12RB2/PIK3R3/CRLF2/JAK3/PIK3CG/IL3RA/CCND1/IL9R/PIAS2/SPRED1/AKT1/PIK3CD/STAT2/IL7R/IL20RB/IL15RA/IL23A/IL13RA2/AKT3/PIK3R5/IL21R/LIF/CSF2/CSF2RA/IL15/SOCS1/JAK2/IL2RA/IFNG/IL2RB/IL10RA/SOCS3/PIAS3/CSF3R/IL11/OSMR/STAT1/OSM/CSF2RB/IL24/IL6
BIOCARTA_NO2IL12_PATHWAY	BIOCARTA_NO2IL12_PATHWAY	BIOCARTA_NO2IL12_PATHWAY	15	-0.764065	-1.90986	0.000435492	0.00544731	0.00434143	2904	tags=87%, list=18%, signal=71%	STAT4/CD3G/IL12RB1/IL12RB2/NOS2/CD3E/CD4/CD3D/CD247/JAK2/CD2/CCR5/IFNG
KEGG_CYTOSOLIC_DNA_SENSING_PATHWAY	KEGG_CYTOSOLIC_DNA_SENSING_PATHWAY	KEGG_CYTOSOLIC_DNA_SENSING_PATHWAY	49	-0.564143	-1.85291	0.000490331	0.00606438	0.00483324	1295	tags=18%, list=8%, signal=17%	IL18/IRF7/POLR3G/CCL5/IL1B/AIM2/CCL4/IL6/CXCL10
REACTOME_METABOLISM_OF_POLYAMINES	REACTOME_METABOLISM_OF_POLYAMINES	REACTOME_METABOLISM_OF_POLYAMINES	55	-0.543216	-1.82767	0.000492017	0.00606438	0.00483324	3568	tags=53%, list=22%, signal=41%	PSMA5/PSMC5/PSMD13/SMS/ODC1/OAZ1/PSMB4/PSMB2/PSMB10/PSMD1/PSMD12/PSMA4/PSMD14/PSMA3/PSMA1/PSMD8/PSMB3/PSMD9/PSMC4/PSMD2/PSMC1/PSMC3/PSMB8/PSMB5/PSME1/SRM/PSMC6/PSMB6/PSMB9
WP_GLYCOSAMINOGLYCAN_SYNTHESIS_IN_FIBROBLASTS	WP_GLYCOSAMINOGLYCAN_SYNTHESIS_IN_FIBROBLASTS	WP_GLYCOSAMINOGLYCAN_SYNTHESIS_IN_FIBROBLASTS	41	-0.579554	-1.82559	0.000492592	0.00606438	0.00483324	1846	tags=46%, list=11%, signal=41%	CSGALNACT1/B3GALT6/CHST1/HS3ST1/HS3ST2/EXTL2/CHPF/HS3ST3B1/CHST7/CHSY3/DSE/HS6ST2/CHSY1/CHST3/UST/CSGALNACT2/CHST15/HS3ST3A1/CHST11
PID_P53_DOWNSTREAM_PATHWAY	PID_P53_DOWNSTREAM_PATHWAY	PID_P53_DOWNSTREAM_PATHWAY	130	-0.423648	-1.63528	0.000492973	0.00606438	0.00483324	2190	tags=28%, list=14%, signal=25%	NLRC4/PPM1J/PRMT1/CTSD/SH2D1A/PLK3/DDB2/MAP4K4/CD82/TFDP1/CX3CL1/SFN/RNF144B/ZNF385A/LIF/IGFBP3/DDIT4/FAS/MMP2/EPHA2/BNIP3L/FDXR/DUSP5/CCNB1/BCL6/COL18A1/S100A2/TAP1/CAV1/VCAN/DKK1/SNAI2/PMAIP1/SERPINE1/BCL2A1/SERPINB5/SPP1
WP_MICROGLIA_PATHOGEN_PHAGOCYTOSIS_PATHWAY	WP_MICROGLIA_PATHOGEN_PHAGOCYTOSIS_PATHWAY	WP_MICROGLIA_PATHOGEN_PHAGOCYTOSIS_PATHWAY	40	-0.598997	-1.86783	0.000513409	0.00628979	0.00501288	1413	tags=55%, list=9%, signal=50%	PIK3R3/SIGLEC7/PLCG2/PIK3CG/PIK3CD/NCKAP1L/RAC2/NCF1/RAC3/LYN/CYBB/C1QA/HCK/TREM2/C1QC/ITGB2/C1QB/ITGAM/TYROBP/FCER1G/TREM1/NCF2
PID_AVB3_INTEGRIN_PATHWAY	PID_AVB3_INTEGRIN_PATHWAY	PID_AVB3_INTEGRIN_PATHWAY	72	-0.503734	-1.7917	0.000515541	0.00629003	0.00501307	1521	tags=35%, list=9%, signal=32%	ITGAV/COL8A2/FGF2/COL16A1/HSP90AA1/COL4A1/MFGE8/FN1/CSF1R/IRS1/COL7A1/COL6A1/COL6A2/COL5A1/COL12A1/COL6A3/COL8A1/COL3A1/COL1A2/COL5A2/COL1A1/COL15A1/COL11A1/COL10A1/SPP1
KEGG_MEDICUS_REFERENCE_CYTOKINE_JAK_STAT_SIGNALING_PATHWAY	KEGG_MEDICUS_REFERENCE_CYTOKINE_JAK_STAT_SIGNALING_PATHWAY	KEGG_MEDICUS_REFERENCE_CYTOKINE_JAK_STAT_SIGNALING_PATHWAY	45	-0.57388	-1.84481	0.00052101	0.00633081	0.00504557	3573	tags=49%, list=22%, signal=38%	IL6ST/PIM1/IFNGR1/IFNAR2/EPOR/STAT4/IL12RB1/IL12RB2/JAK3/IL3RA/STAT2/IL7R/IL15RA/IL23A/IL15/JAK2/IL2RA/IFNG/IL2RB/STAT1/CSF2RB/IL6
REACTOME_CELLULAR_RESPONSE_TO_HYPOXIA	REACTOME_CELLULAR_RESPONSE_TO_HYPOXIA	REACTOME_CELLULAR_RESPONSE_TO_HYPOXIA	69	-0.508287	-1.78675	0.000548519	0.00663797	0.00529038	3568	tags=49%, list=22%, signal=39%	PSMA5/PSMC5/PSMD13/UBB/RBX1/PSMB4/PSMB2/PSMB10/PSMD1/PSMD12/PSMA4/UBA52/EGLN3/PSMD14/PSMA3/PSMA1/EGLN1/PSMD8/PSMB3/PSMD9/PSMC4/PSMD2/CITED2/PSMC1/PSMC3/PSMB8/PSMB5/PSME1/PSMC6/CA9/PSMB6/HIF1A/AJUBA/PSMB9
PID_FOXM1_PATHWAY	PID_FOXM1_PATHWAY	PID_FOXM1_PATHWAY	39	-0.590069	-1.83239	0.00059521	0.00714527	0.00569469	3178	tags=49%, list=20%, signal=39%	MAP2K1/CDK1/CENPA/LAMA4/SKP2/FOS/CCND1/CKS1B/AURKB/CCNA2/FOXM1/PLK1/BIRC5/NEK2/CDKN2A/MMP2/CCNB1/ETV5/GAS1
REACTOME_FCERI_MEDIATED_NF_KB_ACTIVATION	REACTOME_FCERI_MEDIATED_NF_KB_ACTIVATION	REACTOME_FCERI_MEDIATED_NF_KB_ACTIVATION	76	-0.491092	-1.76567	0.000595239	0.00714527	0.00569469	3568	tags=43%, list=22%, signal=34%	PSMA5/PSMC5/PSMD13/UBB/NFKBIA/PSMB4/CHUK/PSMB2/PSMB10/PSMD1/PSMD12/PSMA4/UBA52/PSMD14/PSMA3/PSMA1/PSMD8/PSMB3/PSMD9/PSMC4/MALT1/PSMD2/PSMC1/PSMC3/PSMB8/PSMB5/PSME1/PSMC6/PSMB6/RASGRP1/LYN/PSMB9/FCER1G
REACTOME_ETHANOL_OXIDATION	REACTOME_ETHANOL_OXIDATION	REACTOME_ETHANOL_OXIDATION	12	0.801259	1.80847	0.00062469	0.00742199	0.00591523	813	tags=50%, list=5%, signal=48%	ADH1C/ADH6/ACSS2/ACSS1/ALDH1B1/ALDH2
KEGG_MEDICUS_ENV_FACTOR_ZN_TO_ANTEROGRADE_AXONAL_TRANSPORT	KEGG_MEDICUS_ENV_FACTOR_ZN_TO_ANTEROGRADE_AXONAL_TRANSPORT	KEGG_MEDICUS_ENV_FACTOR_ZN_TO_ANTEROGRADE_AXONAL_TRANSPORT	15	-0.754568	-1.88612	0.000625207	0.00742199	0.00591523	2082	tags=60%, list=13%, signal=52%	TUBB3/TUBA4A/TUBA1C/TUBB/TUBB2B/TUBA1B/TUBA1A/TUBB2A/TUBB6
KEGG_MEDICUS_PATHOGEN_SARS_COV_2_S_TO_ANGII_AT1R_NOX2_SIGNALING_PATHWAY	KEGG_MEDICUS_PATHOGEN_SARS_COV_2_S_TO_ANGII_AT1R_NOX2_SIGNALING_PATHWAY	KEGG_MEDICUS_PATHOGEN_SARS_COV_2_S_TO_ANGII_AT1R_NOX2_SIGNALING_PATHWAY	14	-0.781306	-1.91344	0.000626581	0.00742199	0.00591523	319	tags=50%, list=2%, signal=49%	CYBB/IL1B/CCL2/IL6/MMP3/CXCL8/MMP1
REACTOME_ACTIVATION_OF_ATR_IN_RESPONSE_TO_REPLICATION_STRESS	REACTOME_ACTIVATION_OF_ATR_IN_RESPONSE_TO_REPLICATION_STRESS	REACTOME_ACTIVATION_OF_ATR_IN_RESPONSE_TO_REPLICATION_STRESS	36	-0.610185	-1.85535	0.000628264	0.00742199	0.00591523	2668	tags=53%, list=17%, signal=44%	MCM7/CHEK1/DBF4/RFC5/RFC4/MCM3/RFC2/RPA1/MCM6/RPA2/CLSPN/MCM2/MCM5/MCM4/CDC45/ORC1/MCM10/CDC6/CDC7
REACTOME_ANTIVIRAL_MECHANISM_BY_IFN_STIMULATED_GENES	REACTOME_ANTIVIRAL_MECHANISM_BY_IFN_STIMULATED_GENES	REACTOME_ANTIVIRAL_MECHANISM_BY_IFN_STIMULATED_GENES	132	-0.423299	-1.63576	0.000636636	0.00749117	0.00597037	4111	tags=46%, list=25%, signal=35%	DNAJC3/NUP93/TARBP2/TUBB4B/FANCE/NUP37/KPNB1/NUP43/PPP2CA/KPNA1/FANCB/NUP133/NUP205/SNCA/UBB/PIN1/ABCE1/CHUK/NUP62/NUP160/FANCG/CDK1/DHX9/NUP50/UBA52/UBE2E1/NUP35/ADAR/ILF2/FANCM/NUP155/SEC13/NUP210/TUBB3/PTPN2/EIF4A3/TUBA4A/OASL/NPM1/TUBA1C/HSPA2/NDC1/EIF2S1/TUBB2B/KPNA2/MX2/TUBA1B/TUBA1A/OAS3/SEH1L/TUBB2A/IFIT1/MX1/FLNA/USP18/STAT1/UBE2L6/TUBB6/ISG15/OAS2/SPHK1
KEGG_MEDICUS_REFERENCE_TSH_DUOX2_TG_SIGNALING_PATHWAY	KEGG_MEDICUS_REFERENCE_TSH_DUOX2_TG_SIGNALING_PATHWAY	KEGG_MEDICUS_REFERENCE_TSH_DUOX2_TG_SIGNALING_PATHWAY	12	0.799917	1.80544	0.00065823	0.00771476	0.00614857	1006	tags=33%, list=6%, signal=31%	PLCB4/DUOX2/TG/PLCB1
REACTOME_CHROMOSOME_MAINTENANCE	REACTOME_CHROMOSOME_MAINTENANCE	REACTOME_CHROMOSOME_MAINTENANCE	85	-0.473101	-1.718	0.000679243	0.00792406	0.00631538	3896	tags=49%, list=24%, signal=38%	MIS18BP1/CHTF18/SMARCA5/CDK2/NOP10/POLD2/RFC1/RBBP4/CENPI/POLD1/CENPK/PRIM1/CENPH/TINF2/CENPA/OIP5/RFC5/CENPL/HJURP/RUVBL1/CENPQ/PRIM2/RFC4/POLR2E/RFC2/RUVBL2/CENPN/POLR2A/POLR2I/CENPU/WRAP53/POLR2G/RPA1/CENPW/CENPM/NPM1/RPA2/MIS18A/ACD/CCNA2/FEN1/POLR2L
WP_HEPATITIS_C_AND_HEPATOCELLULAR_CARCINOMA	WP_HEPATITIS_C_AND_HEPATOCELLULAR_CARCINOMA	WP_HEPATITIS_C_AND_HEPATOCELLULAR_CARCINOMA	49	-0.555731	-1.82528	0.000681411	0.00792406	0.00631538	2369	tags=39%, list=15%, signal=33%	NOS2/FASLG/CCND1/AKT1/RRM2/CXCR1/TGFBR1/COL4A2/BIRC5/UCHL1/MYOF/BIRC3/HIF1A/TGFB1/PODXL/IL6/PTGS2/CXCL8/MMP1
WP_IL_26_SIGNALING_PATHWAYS	WP_IL_26_SIGNALING_PATHWAYS	WP_IL_26_SIGNALING_PATHWAYS	44	-0.566694	-1.81104	0.000686388	0.00795088	0.00633675	1160	tags=39%, list=7%, signal=36%	ACTA2/SMAD2/TNF/DCSTAMP/AKT1/CSF2/NFATC1/JAK2/SOCS3/CTSK/STAT1/ICAM1/MMP9/IL1B/IL6/CXCL8/MMP1
REACTOME_TRIGLYCERIDE_METABOLISM	REACTOME_TRIGLYCERIDE_METABOLISM	REACTOME_TRIGLYCERIDE_METABOLISM	34	0.632619	1.79489	0.000730644	0.00843073	0.00671919	1992	tags=38%, list=12%, signal=34%	FABP1/MOGAT3/MOGAT2/PRKACB/FABP6/MGLL/FABP2/PNPLA4/LPIN3/DGAT1/PPP1CB/DGAT2/GK
KEGG_MEDICUS_VARIANT_SCRAPIE_CONFORMATION_PRPSC_TO_PRNP_PI3K_NOX2_SIGNALING_PATHWAY	KEGG_MEDICUS_VARIANT_SCRAPIE_CONFORMATION_PRPSC_TO_PRNP_PI3K_NOX2_SIGNALING_PATHWAY	KEGG_MEDICUS_VARIANT_SCRAPIE_CONFORMATION_PRPSC_TO_PRNP_PI3K_NOX2_SIGNALING_PATHWAY	16	-0.741517	-1.88367	0.000746703	0.00858276	0.00684035	1829	tags=56%, list=11%, signal=50%	PIK3CD/RAC2/NCF1/PRNP/CAV1/CYBB/CAV2/FYN/NCF2
REACTOME_ASYMMETRIC_LOCALIZATION_OF_PCP_PROTEINS	REACTOME_ASYMMETRIC_LOCALIZATION_OF_PCP_PROTEINS	REACTOME_ASYMMETRIC_LOCALIZATION_OF_PCP_PROTEINS	59	-0.528835	-1.7878	0.000752352	0.00861443	0.00686559	3568	tags=54%, list=22%, signal=42%	PSMA5/PSMC5/PSMD13/UBB/PSMB4/PSMB2/PSMB10/PSMD1/PSMD12/PSMA4/UBA52/PSMD14/SMURF2/PSMA3/PSMA1/PSMD8/FZD1/PRICKLE1/PSMB3/PSMD9/PSMC4/PSMD2/PSMC1/PSMC3/PSMB8/PSMB5/WNT5A/PSME1/PSMC6/PSMB6/FZD2/PSMB9
REACTOME_SIGNALING_BY_THE_B_CELL_RECEPTOR_BCR	REACTOME_SIGNALING_BY_THE_B_CELL_RECEPTOR_BCR	REACTOME_SIGNALING_BY_THE_B_CELL_RECEPTOR_BCR	105	-0.436997	-1.6486	0.000786259	0.00896817	0.00714752	3442	tags=46%, list=21%, signal=36%	PSMC5/PSMD13/UBB/VAV1/NFKBIA/PSMB4/CHUK/PSMB2/PPP3CB/PSMB10/ITPR1/PSMD1/PSMD12/PSMA4/UBA52/PPP3CA/PRKCB/PSMD14/PSMA3/PSMA1/NFKBIE/BTK/PPP3R1/PLCG2/PSMD8/DAPP1/TRPC1/PSMB3/PSMD9/PSMC4/PIK3CD/MALT1/PSMD2/PSMC1/PSMC3/PSMB8/RASGRP3/PSMB5/HRAS/PSME1/PSMC6/NFATC1/PSMB6/RASGRP1/LYN/PSMB9/FYN/PIK3AP1
KEGG_GLYCOSAMINOGLYCAN_BIOSYNTHESIS_CHONDROITIN_SULFATE	KEGG_GLYCOSAMINOGLYCAN_BIOSYNTHESIS_CHONDROITIN_SULFATE	KEGG_GLYCOSAMINOGLYCAN_BIOSYNTHESIS_CHONDROITIN_SULFATE	22	-0.693757	-1.86808	0.000789891	0.00897522	0.00715313	1202	tags=64%, list=7%, signal=59%	CHST12/CHST14/CSGALNACT1/B3GALT6/CHPF/CHST7/CHSY3/DSE/CHSY1/CHST3/UST/CSGALNACT2/CHST15/CHST11
WP_DNA_REPLICATION	WP_DNA_REPLICATION	WP_DNA_REPLICATION	42	-0.574708	-1.8245	0.000807764	0.0091434	0.00728717	3819	tags=64%, list=24%, signal=49%	CDK2/ORC5/POLD2/RFC1/POLD1/UBA52/PRIM1/MCM7/DBF4/RFC5/PRIM2/RFC4/MCM3/RFC2/CDT1/RPA1/MCM6/RPA2/MCM2/MCM5/MCM4/CDC45/ORC1/POLE2/MCM10/CDC6/CDC7
BIOCARTA_TCRA_PATHWAY	BIOCARTA_TCRA_PATHWAY	BIOCARTA_TCRA_PATHWAY	10	-0.814998	-1.83775	0.000817348	0.00921683	0.0073457	2105	tags=90%, list=13%, signal=78%	CD3G/CD3E/CD4/CD3D/CD247/PTPRC/FYN/LCK/HLA-DRA
REACTOME_REGULATION_OF_RUNX2_EXPRESSION_AND_ACTIVITY	REACTOME_REGULATION_OF_RUNX2_EXPRESSION_AND_ACTIVITY	REACTOME_REGULATION_OF_RUNX2_EXPRESSION_AND_ACTIVITY	69	-0.499344	-1.75531	0.000845801	0.0095017	0.00757274	3568	tags=52%, list=22%, signal=41%	PSMA5/PSMC5/PSMD13/UBB/RBX1/PSMB4/PSMB2/PSMB10/PSMD1/PSMD12/PSMA4/UBA52/PSMD14/PSMA3/PSMA1/CBFB/SKP2/NKX3-2/PSMD8/PSMB3/PSMD9/PSMC4/PSMD2/RUNX2/PSMC1/PSMC3/PSMB8/HIVEP3/NR3C1/PSMB5/PSME1/PSMC6/PSMB6/PSMB9/STAT1/TWIST1
REACTOME_GLUCURONIDATION	REACTOME_GLUCURONIDATION	REACTOME_GLUCURONIDATION	12	0.793179	1.79023	0.000867937	0.00971372	0.00774171	1057	tags=42%, list=7%, signal=39%	UGT2B17/UGT2A3/SLC35D1/UGT2B15/UGP2
WP_DISORDERS_OF_BILE_ACID_SYNTHESIS_AND_BILIARY_TRANSPORT	WP_DISORDERS_OF_BILE_ACID_SYNTHESIS_AND_BILIARY_TRANSPORT	WP_DISORDERS_OF_BILE_ACID_SYNTHESIS_AND_BILIARY_TRANSPORT	29	0.654263	1.79336	0.00087432	0.0097485	0.00776943	1056	tags=34%, list=7%, signal=32%	SLC51B/ABCB1/ACOX2/FABP6/AMACR/CYP27A1/SLC51A/ATP8B1/SLC27A2/ABCC3
REACTOME_SARS_COV_2_HOST_INTERACTIONS	REACTOME_SARS_COV_2_HOST_INTERACTIONS	REACTOME_SARS_COV_2_HOST_INTERACTIONS	184	-0.377335	-1.51941	0.000880622	0.0097675	0.00778458	3540	tags=32%, list=22%, signal=25%	RPS16/NUP133/NUP205/VPS18/IFNAR2/UBB/HLA-B/HSP90AB1/CHUK/SNRPG/RPS8/NUP62/TLR7/HLA-G/NUP160/NUP50/UBA52/DDX20/NUP35/HLA-E/HLA-C/RPS18/RPS12/NUP155/TRAF3/FAU/SNRPD2/SEC24A/SEC13/NUP210/RPS5/HLA-F/AKT1/STAT2/YWHAE/SNRPF/GEMIN4/NLRP3/SFN/AKT3/NDC1/IFIH1/KPNA2/RIPK2/RPS4Y1/HSP90AA1/GEMIN2/IRF7/SEH1L/SEC24D/SNRPD1/GJA1/TLR1/TLR8/CAV1/TLR2/STAT1/ISG15
KEGG_MEDICUS_REFERENCE_PRNP_PI3K_NOX2_SIGNALING_PATHWAY	KEGG_MEDICUS_REFERENCE_PRNP_PI3K_NOX2_SIGNALING_PATHWAY	KEGG_MEDICUS_REFERENCE_PRNP_PI3K_NOX2_SIGNALING_PATHWAY	29	-0.63587	-1.84192	0.000884369	0.0097675	0.00778458	1278	tags=34%, list=8%, signal=32%	PIK3CD/RAC2/NCF1/PRNP/CREB3L1/CAV1/CYBB/CAV2/FYN/NCF2
REACTOME_NEGATIVE_REGULATION_OF_ACTIVITY_OF_TFAP2_AP_2_FAMILY_TRANSCRIPTION_FACTORS	REACTOME_NEGATIVE_REGULATION_OF_ACTIVITY_OF_TFAP2_AP_2_FAMILY_TRANSCRIPTION_FACTORS	REACTOME_NEGATIVE_REGULATION_OF_ACTIVITY_OF_TFAP2_AP_2_FAMILY_TRANSCRIPTION_FACTORS	10	-0.812115	-1.83124	0.000885867	0.0097675	0.00778458	880	tags=40%, list=5%, signal=38%	KCTD15/KCTD1/TFAP2C/TFAP2A
WP_ENDOCHONDRAL_OSSIFICATION	WP_ENDOCHONDRAL_OSSIFICATION	WP_ENDOCHONDRAL_OSSIFICATION	62	-0.499356	-1.71023	0.000899197	0.00984158	0.00784362	2197	tags=42%, list=14%, signal=36%	SLC38A2/NKX3-2/ADAMTS5/TGFB2/AKT1/CDKN1C/GLI3/FGFR1/RUNX2/KIF3A/RUNX3/ADAMTS1/FGF2/TIMP3/PTHLH/MGP/SERPINH1/DDR2/MMP13/TGFB1/STAT1/CHST11/MMP9/PLAU/COL10A1/SPP1
WP_ENDOCHONDRAL_OSSIFICATION_WITH_SKELETAL_DYSPLASIAS	WP_ENDOCHONDRAL_OSSIFICATION_WITH_SKELETAL_DYSPLASIAS	WP_ENDOCHONDRAL_OSSIFICATION_WITH_SKELETAL_DYSPLASIAS	62	-0.499356	-1.71023	0.000899197	0.00984158	0.00784362	2197	tags=42%, list=14%, signal=36%	SLC38A2/NKX3-2/ADAMTS5/TGFB2/AKT1/CDKN1C/GLI3/FGFR1/RUNX2/KIF3A/RUNX3/ADAMTS1/FGF2/TIMP3/PTHLH/MGP/SERPINH1/DDR2/MMP13/TGFB1/STAT1/CHST11/MMP9/PLAU/COL10A1/SPP1
KEGG_MEDICUS_VARIANT_MUTATION_CAUSED_ABERRANT_DCTN1_TO_RETROGRADE_AXONAL_TRANSPORT	KEGG_MEDICUS_VARIANT_MUTATION_CAUSED_ABERRANT_DCTN1_TO_RETROGRADE_AXONAL_TRANSPORT	KEGG_MEDICUS_VARIANT_MUTATION_CAUSED_ABERRANT_DCTN1_TO_RETROGRADE_AXONAL_TRANSPORT	14	-0.772309	-1.89141	0.000927334	0.0101124	0.00805942	2082	tags=64%, list=13%, signal=56%	TUBB3/TUBA4A/TUBA1C/TUBB/TUBB2B/TUBA1B/TUBA1A/TUBB2A/TUBB6
REACTOME_PCP_CE_PATHWAY	REACTOME_PCP_CE_PATHWAY	REACTOME_PCP_CE_PATHWAY	87	-0.460796	-1.67937	0.000996259	0.0107913	0.00860053	3442	tags=48%, list=21%, signal=38%	PSMA5/PSMC5/PSMD13/UBB/DVL1/PSMB4/PSMB2/PSMB10/PSMD1/PSMD12/PSMA4/UBA52/PRKCB/PSMD14/SMURF2/PSMA3/PSMA1/AP2B1/PSMD8/FZD1/PRICKLE1/PSMB3/PSMD9/PSMC4/AP2S1/PSMD2/PSMC1/PSMC3/PSMB8/AP2M1/PSMB5/WNT5A/RAC2/ROR1/PSME1/RAC3/PSMC6/PSMB6/PFN1/ROR2/FZD2/PSMB9
PID_IL8_CXCR2_PATHWAY	PID_IL8_CXCR2_PATHWAY	PID_IL8_CXCR2_PATHWAY	34	-0.612034	-1.84187	0.000996845	0.0107913	0.00860053	2784	tags=44%, list=17%, signal=37%	GNB1/PRKCB/GNG2/PIK3CG/AKT1/RAC2/DOCK2/GNAI2/LYN/DNM1/CXCR2/FGR/HCK/GNA15/CXCL8
REACTOME_LAMININ_INTERACTIONS	REACTOME_LAMININ_INTERACTIONS	REACTOME_LAMININ_INTERACTIONS	30	-0.620043	-1.80031	0.00102476	0.0110533	0.00880931	2861	tags=57%, list=18%, signal=47%	HSPG2/ITGB1/LAMA4/ITGA1/ITGA7/LAMC1/LAMC2/ITGAV/COL4A2/ITGA3/LAMA5/LAMA2/COL4A1/LAMB2/COL18A1/COL7A1/NID2
KEGG_PROXIMAL_TUBULE_BICARBONATE_RECLAMATION	KEGG_PROXIMAL_TUBULE_BICARBONATE_RECLAMATION	KEGG_PROXIMAL_TUBULE_BICARBONATE_RECLAMATION	22	0.688961	1.80683	0.00107717	0.0115766	0.00922641	2323	tags=41%, list=14%, signal=35%	PCK1/CA4/ATP1A1/SLC9A3/SLC38A3/ATP1B1/PCK2/GLS/ATP1B2
REACTOME_DNA_STRAND_ELONGATION	REACTOME_DNA_STRAND_ELONGATION	REACTOME_DNA_STRAND_ELONGATION	32	-0.605178	-1.79305	0.00109641	0.0117411	0.0093575	3406	tags=62%, list=21%, signal=49%	POLD2/RFC1/POLD1/PRIM1/GINS4/MCM7/RFC5/PRIM2/RFC4/MCM3/RFC2/RPA1/MCM6/GINS3/RPA2/MCM2/MCM5/MCM4/FEN1/CDC45
REACTOME_REGULATION_OF_MRNA_STABILITY_BY_PROTEINS_THAT_BIND_AU_RICH_ELEMENTS	REACTOME_REGULATION_OF_MRNA_STABILITY_BY_PROTEINS_THAT_BIND_AU_RICH_ELEMENTS	REACTOME_REGULATION_OF_MRNA_STABILITY_BY_PROTEINS_THAT_BIND_AU_RICH_ELEMENTS	81	-0.479935	-1.7297	0.0011312	0.0120702	0.00961977	3692	tags=43%, list=23%, signal=34%	EXOSC8/PSMA5/PSMC5/PSMD13/UBB/EXOSC3/PSMB4/PSMB2/PSMB10/PSMD1/MAPKAPK2/PSMD12/PSMA4/UBA52/PSMD14/PSMA3/PSMA1/EXOSC4/PSMD8/PSMB3/MAPK11/PSMD9/PSMC4/AKT1/PSMD2/PSMC1/PSMC3/PSMB8/EXOSC9/HSPB1/PSMB5/PSME1/PSMC6/PSMB6/PSMB9
KEGG_MEDICUS_VARIANT_MUTATION_CAUSED_ABERRANT_ABETA_TO_26S_PROTEASOME_MEDIATED_PROTEIN_DEGRADATION	KEGG_MEDICUS_VARIANT_MUTATION_CAUSED_ABERRANT_ABETA_TO_26S_PROTEASOME_MEDIATED_PROTEIN_DEGRADATION	KEGG_MEDICUS_VARIANT_MUTATION_CAUSED_ABERRANT_ABETA_TO_26S_PROTEASOME_MEDIATED_PROTEIN_DEGRADATION	34	-0.609854	-1.83531	0.00114339	0.0121567	0.00968872	3568	tags=62%, list=22%, signal=48%	PSMA5/PSMC5/PSMD13/PSMB4/PSMB2/PSMD1/PSMD12/PSMA4/PSMD14/PSMA3/PSMA1/PSMD8/PSMB3/PSMD9/PSMC4/PSMD2/PSMC1/PSMC3/PSMB5/PSMC6/PSMB6
KEGG_MEDICUS_REFERENCE_KINETOCHORE_MICROTUBULE_ATTACHMENT	KEGG_MEDICUS_REFERENCE_KINETOCHORE_MICROTUBULE_ATTACHMENT	KEGG_MEDICUS_REFERENCE_KINETOCHORE_MICROTUBULE_ATTACHMENT	16	-0.727196	-1.84729	0.00117409	0.0123511	0.0098437	3018	tags=69%, list=19%, signal=56%	BUB1B/CENPE/TUBB3/TUBA4A/TUBA1C/TUBB/TUBB2B/TUBA1B/TUBA1A/TUBB2A/TUBB6
REACTOME_TRANSPORT_OF_CONNEXONS_TO_THE_PLASMA_MEMBRANE	REACTOME_TRANSPORT_OF_CONNEXONS_TO_THE_PLASMA_MEMBRANE	REACTOME_TRANSPORT_OF_CONNEXONS_TO_THE_PLASMA_MEMBRANE	16	-0.726777	-1.84623	0.00117409	0.0123511	0.0098437	2082	tags=62%, list=13%, signal=55%	TUBB3/TUBA4A/TUBA1C/TUBB2B/TUBA1B/TUBA1A/TUBB2A/GJA1/GJB2/TUBB6
REACTOME_FATTY_ACID_METABOLISM	REACTOME_FATTY_ACID_METABOLISM	REACTOME_FATTY_ACID_METABOLISM	158	0.423637	1.58996	0.00117413	0.0123511	0.0098437	3049	tags=35%, list=19%, signal=29%	DPEP1/CYP4F2/ACSL5/GPX2/PHYH/ACOX2/ACSL6/EPHX2/AMACR/ACSF2/ACSM3/ACOT11/ACOX1/FAAH/CYP4F3/ACACB/AKR1C3/ACOT8/PCTP/SLC22A5/NUDT7/ACADS/SLC27A2/HADH/ACAA2/ALOX15/DECR2/FAAH2/CYP4F11/DECR1/DBI/SLC25A20/CYP2J2/CBR4/CROT/PTGR1/PECR/EHHADH/ACBD4/ACOT13/MLYCD/ACSF3/HSD17B4/RXRA/NUDT19/HADHA/GGT1/ABCC1/PCCA/SCP2/ACSL3/ACAD10/CPT1A/ACAA1/ACADM
REACTOME_TOLL_LIKE_RECEPTOR_TLR1_TLR2_CASCADE	REACTOME_TOLL_LIKE_RECEPTOR_TLR1_TLR2_CASCADE	REACTOME_TOLL_LIKE_RECEPTOR_TLR1_TLR2_CASCADE	110	-0.444406	-1.69226	0.0011855	0.0124269	0.00990409	3228	tags=32%, list=20%, signal=26%	NFKBIA/CHUK/MAP2K1/MAPKAPK2/CD36/TLR6/UBA52/IRAK3/PELI3/RPS6KA2/BTK/MAP2K4/FOS/NKIRAS1/MAPK11/S100B/NFKB2/RIPK2/USP14/TIFA/NLRC5/MAP3K8/SOCS1/DUSP7/DUSP6/TLR1/S100A12/TLR2/USP18/IKBIP/CD14/LY96/S100A9/S100A8/DUSP4
KEGG_PHOSPHATIDYLINOSITOL_SIGNALING_SYSTEM	KEGG_PHOSPHATIDYLINOSITOL_SIGNALING_SYSTEM	KEGG_PHOSPHATIDYLINOSITOL_SIGNALING_SYSTEM	74	0.509955	1.68913	0.0012229	0.012774	0.0101807	2129	tags=26%, list=13%, signal=22%	PLCB4/INPP5J/INPP5D/PIP5K1B/PIK3R1/PLCG1/ITPR2/PLCD1/OCRL/PLCE1/PLCB1/DGKD/PIK3C2B/DGKQ/CDS1/CDS2/DGKH/PRKCA/SYNJ2
REACTOME_DEGRADATION_OF_GLI1_BY_THE_PROTEASOME	REACTOME_DEGRADATION_OF_GLI1_BY_THE_PROTEASOME	REACTOME_DEGRADATION_OF_GLI1_BY_THE_PROTEASOME	56	-0.508899	-1.71377	0.00122787	0.012781	0.0101863	3568	tags=52%, list=22%, signal=40%	PSMA5/NUMB/PSMC5/PSMD13/UBB/RBX1/PSMB4/PSMB2/PSMB10/PSMD1/PSMD12/PSMA4/UBA52/PSMD14/PSMA3/PSMA1/PSMD8/PSMB3/PSMD9/PSMC4/PSMD2/PSMC1/PSMC3/PSMB8/PSMB5/PSME1/PSMC6/PSMB6/PSMB9
KEGG_DRUG_METABOLISM_CYTOCHROME_P450	KEGG_DRUG_METABOLISM_CYTOCHROME_P450	KEGG_DRUG_METABOLISM_CYTOCHROME_P450	56	0.54178	1.71736	0.00123994	0.0128617	0.0102506	509	tags=18%, list=3%, signal=17%	UGT2B17/UGT2A3/ADH1C/CYP2B6/ADH6/FMO4/FMO5/CYP3A5/MAOA/UGT2B15
REACTOME_RHO_GTPASE_EFFECTORS	REACTOME_RHO_GTPASE_EFFECTORS	REACTOME_RHO_GTPASE_EFFECTORS	250	-0.354642	-1.47911	0.00125179	0.0129395	0.0103126	3427	tags=38%, list=21%, signal=31%	ROCK1/PPP2R5E/SRF/KDM1A/PIN1/IQGAP3/NF2/DVL1/DYNC1LI1/MYL12B/RANGAP1/CENPI/BUB1B/NUP160/NDEL1/RHOG/ERCC6L/CENPK/CENPE/DIAPH3/CENPH/CTTN/PPP2R5C/PPP1R12A/PRKCB/CENPA/WASF3/ZWINT/BUB3/ITGB1/CENPL/ACTB/PKN1/INCENP/CENPQ/BTK/PRC1/FMNL1/NUDC/SEC13/MYL9/ZWILCH/TUBB3/MAPK11/SPC25/SRGAP2/CENPN/MIS12/TUBA4A/SKA2/CENPU/YWHAE/FMNL3/CENPM/PKN3/TUBA1C/AURKB/BAIAP2/RHOQ/BUB1/SFN/MAD2L1/NCKAP1L/MAD1L1/NUF2/KIF1…
WP_VITAMIN_D_RECEPTOR_PATHWAY	WP_VITAMIN_D_RECEPTOR_PATHWAY	WP_VITAMIN_D_RECEPTOR_PATHWAY	164	-0.388115	-1.5396	0.00130235	0.0134156	0.0106921	2305	tags=31%, list=14%, signal=27%	LRRC8A/EFNA5/COL13A1/ADAMTS5/CCND1/TGFB2/CYP27B1/DND1/DNER/G6PD/LRRC25/IRF8/NINJ1/SERPINB1/CREG2/KRT13/TIMP3/CTLA4/MX2/PTHLH/IGFBP3/CDKN2A/CD40/TNFRSF11B/CA9/IGFBP5/RASGRP1/CD200/THBD/DUSP10/HIF1A/STEAP4/BCL6/S100A2/HLA-DQA1/TGFB1/ALOX5/TNFSF4/TIMP2/CST6/CD14/S100A4/KRT16/KLK6/ITGAM/G0S2/SPRR1B/S100A9/TREM1/S100A8/SPP1
REACTOME_PLATELET_ADHESION_TO_EXPOSED_COLLAGEN	REACTOME_PLATELET_ADHESION_TO_EXPOSED_COLLAGEN	REACTOME_PLATELET_ADHESION_TO_EXPOSED_COLLAGEN	14	-0.762717	-1.86792	0.00133995	0.0137552	0.0109628	2498	tags=57%, list=15%, signal=48%	ITGB1/ITGA1/VWF/LYN/COL1A2/FYN/COL1A1/FCER1G
REACTOME_RESPONSE_TO_METAL_IONS	REACTOME_RESPONSE_TO_METAL_IONS	REACTOME_RESPONSE_TO_METAL_IONS	12	-0.779693	-1.83124	0.0013712	0.0140277	0.0111799	2280	tags=58%, list=14%, signal=50%	MT1M/MT1F/MT1G/MT1H/MT1X/MT1E/MT2A
REACTOME_DISEASES_OF_IMMUNE_SYSTEM	REACTOME_DISEASES_OF_IMMUNE_SYSTEM	REACTOME_DISEASES_OF_IMMUNE_SYSTEM	31	-0.604243	-1.76773	0.00139329	0.0141951	0.0113133	3228	tags=48%, list=20%, signal=39%	NFKBIA/CHUK/CD36/TLR6/UNC93B1/TRAF3/TLR5/BTK/NFKB2/TLR1/TLR2/CD14/LY96/S100A9/S100A8
WP_OXIDATION_BY_CYTOCHROME_P450	WP_OXIDATION_BY_CYTOCHROME_P450	WP_OXIDATION_BY_CYTOCHROME_P450	57	0.532096	1.6882	0.0013971	0.0141951	0.0113133	1280	tags=23%, list=8%, signal=21%	CYP2B6/CYP4F2/CYP2W1/CYP4F12/CYP39A1/CYP27A1/CYP3A5/CYP2S1/CYP4F3/CYP4X1/CYP4F11/CYP2D6/CYP2J2
REACTOME_INTERLEUKIN_6_SIGNALING	REACTOME_INTERLEUKIN_6_SIGNALING	REACTOME_INTERLEUKIN_6_SIGNALING	11	-0.795143	-1.83737	0.00141124	0.0142767	0.0113783	883	tags=36%, list=5%, signal=34%	JAK2/SOCS3/STAT1/IL6
REACTOME_BILE_ACID_AND_BILE_SALT_METABOLISM	REACTOME_BILE_ACID_AND_BILE_SALT_METABOLISM	REACTOME_BILE_ACID_AND_BILE_SALT_METABOLISM	44	0.580206	1.75154	0.00141472	0.0142767	0.0113783	2328	tags=41%, list=14%, signal=35%	SLC51B/ACOX2/FABP6/CYP39A1/AMACR/CYP27A1/SLC51A/OSBPL2/STARD5/AKR1C3/ACOT8/SLC27A2/ABCC3/NR1H4/OSBPL7/HSD17B4/RXRA/NCOA2
WP_OXYSTEROLS_DERIVED_FROM_CHOLESTEROL	WP_OXYSTEROLS_DERIVED_FROM_CHOLESTEROL	WP_OXYSTEROLS_DERIVED_FROM_CHOLESTEROL	49	0.561615	1.73711	0.0014205	0.0142866	0.0113863	1038	tags=22%, list=6%, signal=21%	HSD11B2/NR1I2/ACOX2/CYP39A1/EPHX2/AMACR/RORC/CYP27A1/ACOT11/ACOT8/SLC27A2
KEGG_MEDICUS_REFERENCE_DNA_REPLICATION_LICENSING	KEGG_MEDICUS_REFERENCE_DNA_REPLICATION_LICENSING	KEGG_MEDICUS_REFERENCE_DNA_REPLICATION_LICENSING	24	-0.655992	-1.8198	0.00142591	0.0142927	0.0113911	2903	tags=67%, list=18%, signal=55%	CDK2/ORC5/CCNE2/MCM7/DBF4/MCM3/CDT1/MCM6/MCM2/CCNA2/MCM5/MCM4/CDC45/ORC1/CDC6/CDC7
WP_IMMUNE_RESPONSE_TO_TUBERCULOSIS	WP_IMMUNE_RESPONSE_TO_TUBERCULOSIS	WP_IMMUNE_RESPONSE_TO_TUBERCULOSIS	22	-0.679991	-1.83101	0.00146142	0.0145616	0.0116054	2014	tags=68%, list=12%, signal=60%	IFNGR1/IFNAR2/IFI35/IRF9/PTPN2/STAT2/PSMB8/SOCS1/JAK2/IRF1/TAP1/IFIT1/MX1/STAT1/IFIT3
REACTOME_TRANSPORT_OF_BILE_SALTS_AND_ORGANIC_ACIDS_METAL_IONS_AND_AMINE_COMPOUNDS	REACTOME_TRANSPORT_OF_BILE_SALTS_AND_ORGANIC_ACIDS_METAL_IONS_AND_AMINE_COMPOUNDS	REACTOME_TRANSPORT_OF_BILE_SALTS_AND_ORGANIC_ACIDS_METAL_IONS_AND_AMINE_COMPOUNDS	79	0.492573	1.65552	0.00146251	0.0145616	0.0116054	2445	tags=30%, list=15%, signal=26%	SLC39A5/SLC13A2/SLC39A2/SLC40A1/SLC13A3/SLC6A6/SLC44A4/HEPH/SLC44A3/SLC22A3/SLC22A11/SLC30A2/SLC22A5/SLC11A2/SLC6A19/SLC30A10/SLC44A5/SLC39A4/SLC44A1/SLC22A18/SLC30A1/EMB/SLC2A13/SLC22A12
PID_INTEGRIN2_PATHWAY	PID_INTEGRIN2_PATHWAY	PID_INTEGRIN2_PATHWAY	27	-0.640749	-1.82529	0.0015174	0.0150321	0.0119804	626	tags=48%, list=4%, signal=46%	ICAM4/ITGAL/JAM3/VCAM1/ITGAX/THY1/C3/PLAUR/ICAM1/ITGB2/FCGR2A/PLAU/ITGAM
KEGG_BUTANOATE_METABOLISM	KEGG_BUTANOATE_METABOLISM	KEGG_BUTANOATE_METABOLISM	33	0.61258	1.71987	0.00151987	0.0150321	0.0119804	1782	tags=36%, list=11%, signal=32%	HMGCS2/ABAT/ACSM3/AKR1B10/ALDH1B1/PDHA1/ALDH2/ACADS/BDH1/HADH/BDH2/EHHADH
REACTOME_SYNDECAN_INTERACTIONS	REACTOME_SYNDECAN_INTERACTIONS	REACTOME_SYNDECAN_INTERACTIONS	25	-0.636332	-1.76095	0.00152801	0.0150625	0.0120046	2153	tags=56%, list=13%, signal=49%	ACTN1/THBS1/ITGAV/FGF2/COL5A3/FN1/SDC2/TGFB1/COL5A1/COL3A1/COL1A2/COL5A2/COL1A1/TNC
WP_PI3K_AKT_SIGNALING_PATHWAY	WP_PI3K_AKT_SIGNALING_PATHWAY	WP_PI3K_AKT_SIGNALING_PATHWAY	326	-0.327461	-1.40139	0.00157745	0.0154986	0.0123522	2498	tags=24%, list=15%, signal=21%	ITGB1/LAMA4/PDGFB/PKN1/PIK3R3/RPS6KB1/GNG2/ITGA1/ITGA7/FASLG/JAK3/EFNA5/ANGPT2/PIK3CG/IL3RA/THEM4/LAMC1/CCND1/THBS1/ITGA4/ITGA11/AKT1/PIK3CD/FGFR1/LAMC2/IL7R/GNG10/PKN3/VWF/ITGAV/COL4A2/AKT3/FGF2/EIF4EBP1/FGF7/PIK3R5/ITGA3/HSP90B1/GNB5/HRAS/F2R/LAMA5/KITLG/GNG11/THBS4/LAMA2/HSP90AA1/PDGFRB/JAK2/DDIT4/COL4A1/EPHA2/IL2RA/PDGFC/FN1/IL2RB/CSF1R/GNB4/IRS1/LAMB2/CREB3L1/COL6A1/CSF3R/VEGFC/COL6A2/OSMR/T…
REACTOME_INACTIVATION_OF_CSF3_G_CSF_SIGNALING	REACTOME_INACTIVATION_OF_CSF3_G_CSF_SIGNALING	REACTOME_INACTIVATION_OF_CSF3_G_CSF_SIGNALING	23	-0.657539	-1.81446	0.00163566	0.0160176	0.0127658	944	tags=30%, list=6%, signal=29%	SOCS1/JAK2/LYN/SOCS3/CSF3R/STAT1/HCK
REACTOME_DEPOSITION_OF_NEW_CENPA_CONTAINING_NUCLEOSOMES_AT_THE_CENTROMERE	REACTOME_DEPOSITION_OF_NEW_CENPA_CONTAINING_NUCLEOSOMES_AT_THE_CENTROMERE	REACTOME_DEPOSITION_OF_NEW_CENPA_CONTAINING_NUCLEOSOMES_AT_THE_CENTROMERE	24	-0.652949	-1.81136	0.00172165	0.0168044	0.0133929	3896	tags=75%, list=24%, signal=57%	MIS18BP1/SMARCA5/RBBP4/CENPI/CENPK/CENPH/CENPA/OIP5/CENPL/HJURP/RUVBL1/CENPQ/CENPN/CENPU/CENPW/CENPM/NPM1/MIS18A
WP_CONSTITUTIVE_ANDROSTANE_RECEPTOR_PATHWAY	WP_CONSTITUTIVE_ANDROSTANE_RECEPTOR_PATHWAY	WP_CONSTITUTIVE_ANDROSTANE_RECEPTOR_PATHWAY	27	0.645518	1.76149	0.00179418	0.0174552	0.0139115	2328	tags=44%, list=14%, signal=38%	CYP2B6/ABCB1/CYP3A5/PPARGC1A/SULT1A1/ABCC3/NCOA6/EHHADH/CYP3A4/ABCC2/RXRA/NCOA2
REACTOME_INTERLEUKIN_12_FAMILY_SIGNALING	REACTOME_INTERLEUKIN_12_FAMILY_SIGNALING	REACTOME_INTERLEUKIN_12_FAMILY_SIGNALING	53	-0.516684	-1.72598	0.00181308	0.0175816	0.0140123	3008	tags=42%, list=19%, signal=34%	IL10/STAT4/MTAP/IL12RB1/CNN2/IL27RA/IL12RB2/P4HB/ANXA2/SOD1/BOLA2/IL23A/GSTO1/MSN/JAK2/LCP1/IFNG/SOD2/MIF/VAMP7/STAT1/SERPINB2
WP_PHOTODYNAMIC_THERAPY_INDUCED_HIF_1_SURVIVAL_SIGNALING	WP_PHOTODYNAMIC_THERAPY_INDUCED_HIF_1_SURVIVAL_SIGNALING	WP_PHOTODYNAMIC_THERAPY_INDUCED_HIF_1_SURVIVAL_SIGNALING	37	-0.585216	-1.79039	0.00182719	0.0176044	0.0140305	2818	tags=51%, list=17%, signal=42%	ANGPT1/HK1/PGK1/EGLN1/NOS2/LDHA/ANGPT2/BIRC5/PKM/IGFBP3/BNIP3L/TGFB3/HIF1A/SLC2A1/PMAIP1/SERPINE1/SLC2A3/PTGS2/BCL2A1
WP_HYPOTHESIZED_PATHWAYS_IN_PATHOGENESIS_OF_CARDIOVASCULAR_DISEASE	WP_HYPOTHESIZED_PATHWAYS_IN_PATHOGENESIS_OF_CARDIOVASCULAR_DISEASE	WP_HYPOTHESIZED_PATHWAYS_IN_PATHOGENESIS_OF_CARDIOVASCULAR_DISEASE	24	-0.650317	-1.80406	0.00182727	0.0176044	0.0140305	2729	tags=46%, list=17%, signal=38%	AGTR1/SMAD2/ANGPT2/LTBP2/RUNX2/TGFBR1/ENG/FLNA/FBN1/SERPINE1/POSTN
PID_HNF3B_PATHWAY	PID_HNF3B_PATHWAY	PID_HNF3B_PATHWAY	43	0.560893	1.681	0.00193881	0.0185761	0.0148049	3331	tags=42%, list=21%, signal=33%	PCK1/CEBPA/HNF1B/HNF4A/PKLR/FOXA2/BDH1/FOXA3/HADH/HNF1A/F2/ALDOB/PDX1/TFRC/CPT1A/ACADM/APOA1/SP1
KEGG_MEDICUS_REFERENCE_IL6_FAMILY_TO_JAK_STAT_SIGNALING_PATHWAY	KEGG_MEDICUS_REFERENCE_IL6_FAMILY_TO_JAK_STAT_SIGNALING_PATHWAY	KEGG_MEDICUS_REFERENCE_IL6_FAMILY_TO_JAK_STAT_SIGNALING_PATHWAY	26	-0.626396	-1.77218	0.0019406	0.0185761	0.0148049	1404	tags=31%, list=9%, signal=28%	IL13RA2/LIF/JAK2/IL11/OSMR/STAT1/OSM/IL6
KEGG_MEDICUS_REFERENCE_KINETOCHORE_FIBER_ORGANIZATION	KEGG_MEDICUS_REFERENCE_KINETOCHORE_FIBER_ORGANIZATION	KEGG_MEDICUS_REFERENCE_KINETOCHORE_FIBER_ORGANIZATION	19	-0.698984	-1.85601	0.00195733	0.0186165	0.0148371	2082	tags=53%, list=13%, signal=46%	TUBB3/TUBA4A/TUBA1C/TACC3/TUBB/TUBB2B/TUBA1B/TUBA1A/TUBB2A/TUBB6
KEGG_MEDICUS_VARIANT_MUTATION_CAUSED_ABERRANT_ABETA_TO_ANTEROGRADE_AXONAL_TRANSPORT	KEGG_MEDICUS_VARIANT_MUTATION_CAUSED_ABERRANT_ABETA_TO_ANTEROGRADE_AXONAL_TRANSPORT	KEGG_MEDICUS_VARIANT_MUTATION_CAUSED_ABERRANT_ABETA_TO_ANTEROGRADE_AXONAL_TRANSPORT	19	-0.698367	-1.85437	0.00195733	0.0186165	0.0148371	2082	tags=47%, list=13%, signal=41%	TUBB3/TUBA4A/TUBA1C/TUBB/TUBB2B/TUBA1B/TUBA1A/TUBB2A/TUBB6
BIOCARTA_ERYTH_PATHWAY	BIOCARTA_ERYTH_PATHWAY	BIOCARTA_ERYTH_PATHWAY	14	-0.748609	-1.83336	0.00198472	0.0187797	0.0149672	1165	tags=64%, list=7%, signal=60%	CSF3/IL1A/TGFB2/KITLG/CSF2/TGFB3/IL11/TGFB1/IL6
REACTOME_SIGNALING_BY_CSF3_G_CSF	REACTOME_SIGNALING_BY_CSF3_G_CSF	REACTOME_SIGNALING_BY_CSF3_G_CSF	28	-0.609056	-1.75595	0.0019871	0.0187797	0.0149672	944	tags=25%, list=6%, signal=24%	SOCS1/JAK2/LYN/SOCS3/CSF3R/STAT1/HCK
REACTOME_GAP_JUNCTION_TRAFFICKING_AND_REGULATION	REACTOME_GAP_JUNCTION_TRAFFICKING_AND_REGULATION	REACTOME_GAP_JUNCTION_TRAFFICKING_AND_REGULATION	43	-0.540273	-1.72245	0.00200752	0.0189126	0.0150731	2136	tags=44%, list=13%, signal=38%	GJC1/TUBB3/TUBA4A/TUBA1C/GJB6/GJA3/AP2M1/GJA4/TUBB2B/TUBA1B/GJA5/TUBA1A/DNM1/TUBB2A/GJA1/GJB3/GJB2/TUBB6/GJB5
WP_CONTROL_OF_IMMUNE_TOLERANCE_BY_VASOACTIVE_INTESTINAL_PEPTIDE	WP_CONTROL_OF_IMMUNE_TOLERANCE_BY_VASOACTIVE_INTESTINAL_PEPTIDE	WP_CONTROL_OF_IMMUNE_TOLERANCE_BY_VASOACTIVE_INTESTINAL_PEPTIDE	13	-0.757525	-1.81108	0.00204069	0.0191358	0.015251	3008	tags=62%, list=19%, signal=50%	IL10/CD28/CD80/CTLA4/FAS/IFNG/TGFB1/CD86
REACTOME_ASPIRIN_ADME	REACTOME_ASPIRIN_ADME	REACTOME_ASPIRIN_ADME	29	0.628387	1.72243	0.00205288	0.0191358	0.015251	2060	tags=28%, list=13%, signal=24%	UGT2B17/UGT2A3/CES2/UGT2B15/ABCC3/CYP2D6/CYP3A4/ABCC2
WP_ROLE_OF_HYPOXIA_ANGIOGENESIS_AND_FGF_PATHWAY_IN_OA_CHONDROCYTE_HYPERTROPHY	WP_ROLE_OF_HYPOXIA_ANGIOGENESIS_AND_FGF_PATHWAY_IN_OA_CHONDROCYTE_HYPERTROPHY	WP_ROLE_OF_HYPOXIA_ANGIOGENESIS_AND_FGF_PATHWAY_IN_OA_CHONDROCYTE_HYPERTROPHY	48	-0.527818	-1.71682	0.00205606	0.0191358	0.015251	2291	tags=35%, list=14%, signal=30%	RELB/FOS/AKT1/FGFR1/RUNX2/DIO2/AKT3/JAK2/DDR2/HIF1A/MMP13/IBSP/COL3A1/COL1A1/FOSL1/COL10A1/SPP1
REACTOME_RUNX1_REGULATES_TRANSCRIPTION_OF_GENES_INVOLVED_IN_DIFFERENTIATION_OF_HSCS	REACTOME_RUNX1_REGULATES_TRANSCRIPTION_OF_GENES_INVOLVED_IN_DIFFERENTIATION_OF_HSCS	REACTOME_RUNX1_REGULATES_TRANSCRIPTION_OF_GENES_INVOLVED_IN_DIFFERENTIATION_OF_HSCS	65	-0.493799	-1.70426	0.00205693	0.0191358	0.015251	3568	tags=49%, list=22%, signal=39%	PSMA5/PSMC5/PSMD13/UBB/PSMB4/PSMB2/PSMB10/PSMD1/PSMD12/PSMA4/UBA52/LMO2/PSMD14/PSMA3/PSMA1/CBFB/PSMD8/PSMB3/PSMD9/PSMC4/PSMD2/PSMC1/PSMC3/PSMB8/PSMB5/GATA3/PSME1/MNAT1/PSMC6/PSMB6/SPI1/PSMB9
REACTOME_SENSORY_PERCEPTION	REACTOME_SENSORY_PERCEPTION	REACTOME_SENSORY_PERCEPTION	290	0.356562	1.4157	0.00210959	0.0195423	0.0155749	3193	tags=20%, list=20%, signal=16%	SCNN1B/REEP1/ESPN/RBP2/TRPM4/TPRN/SCNN1A/CACNA1D/PLS1/CNGA1/USH1C/AKR1B10/MPP1/STRA6/PDE6A/DNAJC5/AKR1C3/EPB41L1/DHRS3/LRP1/GPC4/SDC4/RETSAT/CACNA2D2/PCLO/CIB2/CASK/GPC2/KCNJ2/NAPEPLD/CLIC5/SDC1/CACNB2/DHRS9/EPS8L2/LPL/SCNN1G/LHFPL5/EPS8/PRKCA/TRIOBP/ADCY3/GNG13/TAS2R4/NMT2/PRKCQ/GRK1/TAS2R5/SPTAN1/ESPNL/SYN1/RBP1/SLC24A1/CYP4V2/TRPM5/APOA1/RLBP1
KEGG_FATTY_ACID_METABOLISM	KEGG_FATTY_ACID_METABOLISM	KEGG_FATTY_ACID_METABOLISM	40	0.58516	1.72131	0.00211374	0.0195423	0.0155749	4633	tags=68%, list=29%, signal=48%	ADH1C/ACSL5/ADH6/ACSL6/ACOX1/ALDH1B1/ALDH2/ACADS/HADH/ACAA2/EHHADH/ADH4/HADHA/ACADSB/ADH1B/ACSL3/CPT1A/ACAA1/ACADM/ADH1A/ACAT1/HADHB/ALDH7A1/ACOX3/CPT2/ACAT2/GCDH
WP_THYMIC_STROMAL_LYMPHOPOIETIN_TSLP_SIGNALING_PATHWAY	WP_THYMIC_STROMAL_LYMPHOPOIETIN_TSLP_SIGNALING_PATHWAY	WP_THYMIC_STROMAL_LYMPHOPOIETIN_TSLP_SIGNALING_PATHWAY	40	-0.557556	-1.73861	0.00215905	0.0198994	0.0158596	3399	tags=45%, list=21%, signal=36%	PI4K2A/FES/NFKBIA/MAP2K1/STAT4/BTK/CRLF2/RELB/AKT1/IL7R/NFKB2/EIF4EBP1/JAK2/LYN/STAT1/HCK/FYN/LCK
REACTOME_REGULATION_OF_HSF1_MEDIATED_HEAT_SHOCK_RESPONSE	REACTOME_REGULATION_OF_HSF1_MEDIATED_HEAT_SHOCK_RESPONSE	REACTOME_REGULATION_OF_HSF1_MEDIATED_HEAT_SHOCK_RESPONSE	76	-0.463616	-1.66689	0.00228608	0.0210051	0.0167408	3566	tags=47%, list=22%, signal=37%	NUP93/NUP37/NUP43/CCAR2/DNAJB6/NUP133/NUP205/UBB/NUP62/MRPL18/MAPKAPK2/NUP160/NUP50/HSPB2/NUP35/NUP155/FKBP4/SEC13/HSPA4/HSPA12B/NUP210/YWHAE/HSPA5/RPA1/RPA2/HSPB1/HSPA2/NDC1/BAG4/HSPA13/BAG3/SERPINH1/SEH1L/HSPA6/HSPA4L/BAG2
WP_ACUTE_VIRAL_MYOCARDITIS	WP_ACUTE_VIRAL_MYOCARDITIS	WP_ACUTE_VIRAL_MYOCARDITIS	85	-0.449564	-1.63253	0.00231705	0.021177	0.0168778	2561	tags=36%, list=16%, signal=31%	SGCD/TLR5/ACTB/BNIP2/CCND1/TNF/MICA/CD4/SGCB/AKT1/CD80/ITGAL/PARP1/NFKB2/RAC2/AIF1/RAC3/LAMA2/SOCS1/CCR5/IFNG/TGFB1/CAV1/CD55/STAT1/HLA-DMA/ITGB2/FYN/MMP9/CXCR4/IL6
BIOCARTA_CTLA4_PATHWAY	BIOCARTA_CTLA4_PATHWAY	BIOCARTA_CTLA4_PATHWAY	18	-0.686836	-1.78557	0.00231901	0.021177	0.0168778	2872	tags=67%, list=18%, signal=55%	CD3G/CD28/ITK/CD3E/CD3D/CD80/ICOS/CD247/CTLA4/CD86/LCK/HLA-DRA
REACTOME_INTERLEUKIN_12_SIGNALING	REACTOME_INTERLEUKIN_12_SIGNALING	REACTOME_INTERLEUKIN_12_SIGNALING	43	-0.535009	-1.70567	0.00235189	0.0214116	0.0170647	3008	tags=44%, list=19%, signal=36%	IL10/STAT4/MTAP/IL12RB1/CNN2/IL12RB2/P4HB/ANXA2/SOD1/BOLA2/GSTO1/MSN/JAK2/LCP1/IFNG/SOD2/MIF/VAMP7/SERPINB2
PID_SYNDECAN_4_PATHWAY	PID_SYNDECAN_4_PATHWAY	PID_SYNDECAN_4_PATHWAY	32	-0.584426	-1.73156	0.00245549	0.0222866	0.0177621	2153	tags=41%, list=13%, signal=35%	ACTN1/THBS1/FGFR1/FGF2/MDK/FN1/TFPI/CCL5/ITGA5/MMP9/ADAM12/CXCR4/TNC
PID_CD8_TCR_DOWNSTREAM_PATHWAY	PID_CD8_TCR_DOWNSTREAM_PATHWAY	PID_CD8_TCR_DOWNSTREAM_PATHWAY	64	-0.490511	-1.68448	0.00249331	0.0225611	0.0179809	3178	tags=42%, list=20%, signal=34%	MAP2K1/PPP3CB/PPP3CA/STAT4/CD3G/PRKCB/FASLG/PPP3R1/FOS/CD3E/TNF/CD3D/TNFRSF4/GZMB/PTPN7/CD247/HRAS/TNFRSF9/EOMES/NFATC1/CD8A/IL2RA/IFNG/IL2RB/TNFRSF18/PRF1/FOSL1
REACTOME_INOSITOL_PHOSPHATE_METABOLISM	REACTOME_INOSITOL_PHOSPHATE_METABOLISM	REACTOME_INOSITOL_PHOSPHATE_METABOLISM	48	0.539536	1.65763	0.00252823	0.0228077	0.0181774	1006	tags=19%, list=6%, signal=18%	PLCB4/INPP5J/INPP5D/PLCG1/PLCD1/OCRL/NUDT4/PLCE1/PLCB1
WP_2Q13_COPY_NUMBER_VARIATION_SYNDROME	WP_2Q13_COPY_NUMBER_VARIATION_SYNDROME	WP_2Q13_COPY_NUMBER_VARIATION_SYNDROME	55	-0.502852	-1.69186	0.0026093	0.0234679	0.0187036	2241	tags=29%, list=14%, signal=25%	PLCG2/IL1RAP/POLR2E/TTL/IL23A/GATA3/CSF2/POLR2L/SOCS1/IL1R1/SOCS3/STAT1/IL1B/CXCL13/IL1RN/IL6
PID_INTEGRIN_CS_PATHWAY	PID_INTEGRIN_CS_PATHWAY	PID_INTEGRIN_CS_PATHWAY	25	-0.614015	-1.69919	0.00272262	0.0244134	0.0194571	2645	tags=56%, list=16%, signal=47%	ITGB7/ITGB1/ITGA1/ITGA7/ITGA4/ITGA11/ITGAL/ITGAE/ITGAV/ITGA3/ITGAX/ITGA5/ITGB2/ITGAM
REACTOME_REGULATION_OF_RAS_BY_GAPS	REACTOME_REGULATION_OF_RAS_BY_GAPS	REACTOME_REGULATION_OF_RAS_BY_GAPS	63	-0.484561	-1.66757	0.00275694	0.0246468	0.0196432	3568	tags=49%, list=22%, signal=38%	PSMA5/PSMC5/PSMD13/UBB/RBX1/PSMB4/PSMB2/PSMB10/PSMD1/PSMD12/PSMA4/UBA52/PSMD14/PSMA3/PSMA1/PSMD8/PSMB3/SPRED1/PSMD9/PSMC4/PSMD2/PSMC1/PSMC3/PSMB8/PSMB5/HRAS/PSME1/RASA3/PSMC6/PSMB6/PSMB9
PID_TXA2PATHWAY	PID_TXA2PATHWAY	PID_TXA2PATHWAY	53	-0.502516	-1.67865	0.00277317	0.0247178	0.0196997	2366	tags=42%, list=15%, signal=36%	GNB1/PRKCB/GNG2/PRKCH/PIK3CG/TGM2/GNA12/MAPK11/AKT1/PIK3R5/GNB5/GNAI2/VCAM1/LYN/DNM1/SELE/FGR/HCK/ICAM1/FYN/GNA15/LCK
REACTOME_PHASE_II_CONJUGATION_OF_COMPOUNDS	REACTOME_PHASE_II_CONJUGATION_OF_COMPOUNDS	REACTOME_PHASE_II_CONJUGATION_OF_COMPOUNDS	84	0.477117	1.61566	0.00281355	0.0250028	0.0199269	4105	tags=48%, list=25%, signal=36%	SLC26A2/UGT2B17/UGT2A3/NAT2/SULT1B1/GGT7/GGT6/SLC35D1/UGT2B15/SULT1A1/GSS/UGP2/MAT1A/SULT1A2/SULT4A1/SLC35B3/NAT1/PAPSS2/SLC26A1/GSTA1/OPLAH/GGT1/ABHD14B/MGST1/GSTM1/UGDH/SULT2B1/GCLC/ACSM1/COMT/AHCY/GSTK1/GSTM2/GCLM/GLYATL1/BPNT1/MGST2/UGT2B28/GSTA4/GSTM3
REACTOME_RECEPTOR_TYPE_TYROSINE_PROTEIN_PHOSPHATASES	REACTOME_RECEPTOR_TYPE_TYROSINE_PROTEIN_PHOSPHATASES	REACTOME_RECEPTOR_TYPE_TYROSINE_PROTEIN_PHOSPHATASES	20	0.675482	1.72447	0.00291206	0.0258012	0.0205632	1229	tags=25%, list=8%, signal=23%	PTPRD/PPFIBP2/SLITRK6/PTPRF/PPFIA3
KEGG_MEDICUS_REFERENCE_TRAIP_DEPENDENT_REPLISOME_DISASSEMBLY	KEGG_MEDICUS_REFERENCE_TRAIP_DEPENDENT_REPLISOME_DISASSEMBLY	KEGG_MEDICUS_REFERENCE_TRAIP_DEPENDENT_REPLISOME_DISASSEMBLY	15	-0.707782	-1.76918	0.00297008	0.0262357	0.0209095	3437	tags=67%, list=21%, signal=53%	UBB/GINS4/MCM7/MCM3/MCM6/GINS3/MCM2/MCM5/MCM4/CDC45
WP_RETINOBLASTOMA_GENE_IN_CANCER	WP_RETINOBLASTOMA_GENE_IN_CANCER	WP_RETINOBLASTOMA_GENE_IN_CANCER	86	-0.447308	-1.62829	0.00298743	0.0262357	0.0209095	3118	tags=44%, list=19%, signal=36%	RBBP4/DCK/FANCG/CDK1/CCNE2/RRM1/PRIM1/MSH6/MDM2/STMN1/MCM7/KIF4A/CHEK1/RFC5/PLK4/SKP2/RFC4/TTK/CCND1/MCM3/DHFR/CDT1/RPA1/MCM6/RRM2/RPA2/TFDP1/CCNA2/DNMT1/MCM4/SAP30/CDC45/ORC1/POLE2/ANLN/CCNB1/CDC7/TYMS
KEGG_MEDICUS_REFERENCE_DNA_REPLICATION_TERMINATION	KEGG_MEDICUS_REFERENCE_DNA_REPLICATION_TERMINATION	KEGG_MEDICUS_REFERENCE_DNA_REPLICATION_TERMINATION	18	-0.678832	-1.76476	0.00298754	0.0262357	0.0209095	3437	tags=72%, list=21%, signal=57%	CUL2/PIF1/UBB/RBX1/GINS4/MCM7/MCM3/MCM6/GINS3/MCM2/MCM5/MCM4/CDC45
REACTOME_SIGNALING_BY_NODAL	REACTOME_SIGNALING_BY_NODAL	REACTOME_SIGNALING_BY_NODAL	19	0.691285	1.73585	0.00306551	0.0268413	0.0213921	2519	tags=53%, list=16%, signal=44%	LEFTY1/ACVR1C/FOXO3/ACVR1B/NODAL/ACVR2B/SMAD3/ACVR2A/PCSK6/MAPK3
KEGG_MEDICUS_REFERENCE_ORGANIZATION_OF_THE_INNER_KINETOCHORE	KEGG_MEDICUS_REFERENCE_ORGANIZATION_OF_THE_INNER_KINETOCHORE	KEGG_MEDICUS_REFERENCE_ORGANIZATION_OF_THE_INNER_KINETOCHORE	14	-0.726249	-1.7786	0.00330059	0.0288148	0.022965	3072	tags=71%, list=19%, signal=58%	CENPI/CENPK/CENPH/CENPA/CENPL/CENPQ/CENPN/CENPU/CENPW/CENPM
BIOCARTA_LYM_PATHWAY	BIOCARTA_LYM_PATHWAY	BIOCARTA_LYM_PATHWAY	13	-0.741414	-1.77256	0.00333376	0.0290193	0.023128	2498	tags=77%, list=15%, signal=65%	ITGB1/ICAM2/ITGA4/ITGAL/PECAM1/VCAM1/SELL/ICAM1/ITGB2/CXCL8
REACTOME_CELLULAR_RESPONSE_TO_HEAT_STRESS	REACTOME_CELLULAR_RESPONSE_TO_HEAT_STRESS	REACTOME_CELLULAR_RESPONSE_TO_HEAT_STRESS	95	-0.428115	-1.58817	0.00337903	0.0293276	0.0233737	4067	tags=44%, list=25%, signal=33%	NUP93/NUP37/NUP43/PTGES3/CCAR2/DNAJB6/NUP133/NUP205/UBB/HSP90AB1/NUP62/MRPL18/AKT1S1/MAPKAPK2/NUP160/NUP50/HSPB2/NUP35/NUP155/FKBP4/SEC13/HSPA4/HSPA12B/NUP210/YWHAE/HSPA5/RPA1/RPA2/HSPB8/HSPB1/HSPA2/NDC1/CRYAB/BAG4/HSPA13/HSP90AA1/BAG3/SERPINH1/SEH1L/HSPA6/HSPA4L/BAG2
REACTOME_METABOLISM_OF_AMINE_DERIVED_HORMONES	REACTOME_METABOLISM_OF_AMINE_DERIVED_HORMONES	REACTOME_METABOLISM_OF_AMINE_DERIVED_HORMONES	18	0.698869	1.75203	0.00346589	0.029994	0.0239049	125	tags=17%, list=1%, signal=17%	DUOX2/DDC/IYD
REACTOME_NRAGE_SIGNALS_DEATH_THROUGH_JNK	REACTOME_NRAGE_SIGNALS_DEATH_THROUGH_JNK	REACTOME_NRAGE_SIGNALS_DEATH_THROUGH_JNK	58	0.518524	1.65371	0.00347963	0.0300257	0.0239301	2556	tags=40%, list=16%, signal=34%	VAV3/NGEF/ARHGEF10L/ARHGEF5/MCF2L/ARHGEF9/KALRN/ARHGEF40/ARHGEF19/ABR/SOS2/ARHGEF1/ARHGEF18/ARHGEF37/PLEKHG5/VAV2/FGD4/ARHGEF11/TRIO/AKAP13/NET1/ARHGEF38/SOS1
PID_REG_GR_PATHWAY	PID_REG_GR_PATHWAY	PID_REG_GR_PATHWAY	78	-0.454189	-1.62473	0.00360089	0.0309822	0.0246924	1454	tags=22%, list=9%, signal=20%	SFN/NR3C1/KRT14/KRT5/GATA3/CSF2/HSP90AA1/NFATC1/IRF1/SPI1/IFNG/SELE/STAT1/ICAM1/IL6/CXCL8/MMP1
BIOCARTA_IL10_PATHWAY	BIOCARTA_IL10_PATHWAY	BIOCARTA_IL10_PATHWAY	13	-0.739043	-1.7669	0.00361662	0.0310279	0.0247288	3013	tags=69%, list=19%, signal=56%	IL1A/IL10/BLVRB/TNF/HMOX1/IL10RA/STAT1/BLVRA/IL6
KEGG_PRION_DISEASES	KEGG_PRION_DISEASES	KEGG_PRION_DISEASES	34	-0.578607	-1.74128	0.00364737	0.0312018	0.0248674	2117	tags=35%, list=13%, signal=31%	LAMC1/SOD1/STIP1/HSPA5/PRNP/CCL5/C1QA/C1QC/FYN/IL1B/C1QB/IL6
REACTOME_SOMITOGENESIS	REACTOME_SOMITOGENESIS	REACTOME_SOMITOGENESIS	51	-0.502103	-1.66987	0.00378039	0.0322471	0.0257005	3568	tags=51%, list=22%, signal=40%	PSMA5/PSMC5/PSMD13/LEF1/PSMB4/PSMB2/PSMB10/PSMD1/PSMD12/PSMA4/PSMD14/PSMA3/PSMA1/PSMD8/PSMB3/PSMD9/PSMC4/PSMD2/PSMC1/PSMC3/PSMB8/PSMB5/PSME1/PSMC6/PSMB6/PSMB9
REACTOME_PYRIMIDINE_CATABOLISM	REACTOME_PYRIMIDINE_CATABOLISM	REACTOME_PYRIMIDINE_CATABOLISM	12	-0.747102	-1.75469	0.00388245	0.033023	0.0263189	546	tags=33%, list=3%, signal=32%	DPYD/UPP1/NT5E/TYMP
WP_P53_TRANSCRIPTIONAL_GENE_NETWORK	WP_P53_TRANSCRIPTIONAL_GENE_NETWORK	WP_P53_TRANSCRIPTIONAL_GENE_NETWORK	86	-0.438365	-1.59574	0.00394139	0.0334288	0.0266423	2848	tags=33%, list=18%, signal=27%	SCO2/ULK2/CPT1C/IRF9/PML/RRM2B/FASLG/THBS1/TNF/DDB2/E2F7/CX3CL1/SFN/LIF/SIVA1/DDIT4/FAS/SLC2A1/DRAM1/SLC7A11/ICAM1/PMAIP1/ISG15/SERPINE1/CCL2/ULBP2/NCF2/SERPINB5
KEGG_MEDICUS_REFERENCE_GLYCOLYSIS	KEGG_MEDICUS_REFERENCE_GLYCOLYSIS	KEGG_MEDICUS_REFERENCE_GLYCOLYSIS	23	-0.624244	-1.72258	0.0039994	0.0338245	0.0269577	2429	tags=57%, list=15%, signal=48%	PGK1/PGAM2/LDHA/GPI/ALDOA/GAPDH/PFKP/PGAM1/PKM/BPGM/ENO1/LDHB/ENO2
PID_TCR_PATHWAY	PID_TCR_PATHWAY	PID_TCR_PATHWAY	62	-0.460659	-1.5777	0.00401729	0.0338795	0.0270015	2223	tags=31%, list=14%, signal=27%	ITK/CD3E/CD4/CD3D/AKT1/MALT1/CD80/CD247/HRAS/MAP3K8/RASSF5/RASGRP1/PTPRC/LCP2/FLNA/CD86/FYN/LCK/HLA-DRA
REACTOME_REGULATION_OF_PTEN_STABILITY_AND_ACTIVITY	REACTOME_REGULATION_OF_PTEN_STABILITY_AND_ACTIVITY	REACTOME_REGULATION_OF_PTEN_STABILITY_AND_ACTIVITY	65	-0.474791	-1.63866	0.00413417	0.0347667	0.0277086	3568	tags=46%, list=22%, signal=36%	PSMA5/PSMC5/PSMD13/UBB/PSMB4/PSMB2/PSMB10/PSMD1/PSMD12/PSMA4/UBA52/PSMD14/PSMA3/PSMA1/PSMD8/PSMB3/PSMD9/PSMC4/AKT1/PSMD2/PSMC1/PSMC3/PSMB8/AKT3/PSMB5/PSME1/PSMC6/USP13/PSMB6/PSMB9
WP_SELENIUM_MICRONUTRIENT_NETWORK	WP_SELENIUM_MICRONUTRIENT_NETWORK	WP_SELENIUM_MICRONUTRIENT_NETWORK	66	-0.465591	-1.60858	0.00420297	0.0352457	0.0280904	2084	tags=30%, list=13%, signal=27%	ALOX15B/TNF/SOD1/KMO/PRDX1/NFKB2/DIO2/SERPINA3/IFNG/SOD2/ALOX5/KYNU/GPX3/ICAM1/ALOX5AP/IL1B/SERPINE1/CCL2/IL6/PTGS2
WP_IL_10_ANTI_INFLAMMATORY_SIGNALING_PATHWAY	WP_IL_10_ANTI_INFLAMMATORY_SIGNALING_PATHWAY	WP_IL_10_ANTI_INFLAMMATORY_SIGNALING_PATHWAY	12	-0.741777	-1.74219	0.0043262	0.0361772	0.0288328	3013	tags=75%, list=19%, signal=61%	IL1A/IL10/BLVRB/STAT2/HMOX1/IL10RA/STAT1/BLVRA/IL6
KEGG_MEDICUS_REFERENCE_MICROTUBULE_DEPOLYMERIZATION	KEGG_MEDICUS_REFERENCE_MICROTUBULE_DEPOLYMERIZATION	KEGG_MEDICUS_REFERENCE_MICROTUBULE_DEPOLYMERIZATION	19	-0.674456	-1.79088	0.00438362	0.0365548	0.0291337	2198	tags=63%, list=14%, signal=55%	KIF18B/TUBB3/TUBA4A/TUBA1C/AURKB/TUBB/TUBB2B/TUBA1B/KIF2C/TUBA1A/TUBB2A/TUBB6
REACTOME_DNA_DAMAGE_BYPASS	REACTOME_DNA_DAMAGE_BYPASS	REACTOME_DNA_DAMAGE_BYPASS	45	-0.517064	-1.66217	0.0044959	0.0373863	0.0297964	3464	tags=42%, list=21%, signal=33%	POLE3/UBB/POLD2/RBX1/USP43/RFC1/POLD1/UBA52/USP1/RFC5/RFC4/RFC2/RPA1/RPA2/DTL/POLE2/MAD2L2/UBE2L6/ISG15
REACTOME_POSTMITOTIC_NUCLEAR_PORE_COMPLEX_NPC_REFORMATION	REACTOME_POSTMITOTIC_NUCLEAR_PORE_COMPLEX_NPC_REFORMATION	REACTOME_POSTMITOTIC_NUCLEAR_PORE_COMPLEX_NPC_REFORMATION	26	-0.600312	-1.69838	0.00453409	0.0375989	0.0299658	4626	tags=73%, list=29%, signal=52%	NUP98/NUP54/NUP93/NUP37/KPNB1/NUP43/AHCTF1/NUP133/NUP205/NUP62/RANGAP1/NUP160/NUP35/NUP155/SEC13/RCC1/RAN/NDC1/SEH1L
KEGG_MEDICUS_REFERENCE_IL2_FAMILY_TO_JAK_STAT_SIGNALING_PATHWAY	KEGG_MEDICUS_REFERENCE_IL2_FAMILY_TO_JAK_STAT_SIGNALING_PATHWAY	KEGG_MEDICUS_REFERENCE_IL2_FAMILY_TO_JAK_STAT_SIGNALING_PATHWAY	23	-0.62169	-1.71553	0.00458735	0.0378959	0.0302026	2312	tags=43%, list=14%, signal=37%	CRLF2/JAK3/IL9R/IL7R/IL15RA/IL21R/IL15/IL2RA/IL2RB/STAT1
REACTOME_TRIGLYCERIDE_BIOSYNTHESIS	REACTOME_TRIGLYCERIDE_BIOSYNTHESIS	REACTOME_TRIGLYCERIDE_BIOSYNTHESIS	12	0.750665	1.69428	0.00459537	0.0378959	0.0302026	1992	tags=50%, list=12%, signal=44%	MOGAT3/MOGAT2/LPIN3/DGAT1/DGAT2/GK
PID_CXCR3_PATHWAY	PID_CXCR3_PATHWAY	PID_CXCR3_PATHWAY	42	-0.529326	-1.68043	0.00475803	0.0391288	0.0311852	2784	tags=43%, list=17%, signal=36%	GNB1/GNAI1/PIK3R3/GNG2/GNAZ/MAPK11/AKT1/PIK3CD/ITGAL/GNAI3/HRAS/GNAI2/DNM1/ITGB2/CXCL13/CXCL9/CXCL11/CXCL10
WP_AMINO_ACID_METABOLISM	WP_AMINO_ACID_METABOLISM	WP_AMINO_ACID_METABOLISM	84	0.464089	1.57154	0.00495169	0.0406094	0.0323651	2191	tags=27%, list=14%, signal=24%	HMGCS2/PCK1/ADH1C/DDC/ACSS1/MAOA/PDK4/PDHA1/MPST/GSS/HADH/HNMT/OTC/SUCLG1/AUH/ACO2/LARS2/EHHADH/ALDH18A1/GLS/PC/DLD/ADH4
PID_ALPHA_SYNUCLEIN_PATHWAY	PID_ALPHA_SYNUCLEIN_PATHWAY	PID_ALPHA_SYNUCLEIN_PATHWAY	30	-0.572218	-1.66145	0.0049921	0.0407392	0.0324686	1140	tags=27%, list=7%, signal=25%	UCHL1/LYN/MAOB/FGR/HCK/FYN/LCK/KLK6
REACTOME_ERKS_ARE_INACTIVATED	REACTOME_ERKS_ARE_INACTIVATED	REACTOME_ERKS_ARE_INACTIVATED	13	-0.727266	-1.73874	0.0049949	0.0407392	0.0324686	899	tags=23%, list=6%, signal=22%	DUSP7/DUSP6/DUSP4
WP_ESTROGEN_RECEPTOR_PATHWAY	WP_ESTROGEN_RECEPTOR_PATHWAY	WP_ESTROGEN_RECEPTOR_PATHWAY	13	0.72671	1.66749	0.00505334	0.0411033	0.0327588	735	tags=46%, list=5%, signal=44%	PCK1/JUN/ACOX1/PDK4/PPARA/NR0B2
WP_OSTEOPONTIN_SIGNALING	WP_OSTEOPONTIN_SIGNALING	WP_OSTEOPONTIN_SIGNALING	13	-0.725692	-1.73498	0.00507612	0.041176	0.0328168	160	tags=54%, list=1%, signal=53%	ITGB3/CHUK/MAP2K1/ITGAV/MMP9/PLAU/SPP1
KEGG_NATURAL_KILLER_CELL_MEDIATED_CYTOTOXICITY	KEGG_NATURAL_KILLER_CELL_MEDIATED_CYTOTOXICITY	KEGG_NATURAL_KILLER_CELL_MEDIATED_CYTOTOXICITY	122	-0.392747	-1.50774	0.00511348	0.0413664	0.0329685	3560	tags=42%, list=22%, signal=33%	TNFRSF10B/IFNGR1/IFNAR2/RAET1E/KIR2DL4/HLA-B/ULBP3/VAV1/MAP2K1/PPP3CB/HLA-G/TNFRSF10A/PPP3CA/HLA-E/HLA-C/PRKCB/PIK3R3/ICAM2/FASLG/PPP3R1/PLCG2/PIK3CG/TNF/MICA/CD48/SH2D1A/PIK3CD/GZMB/ITGAL/CD247/PIK3R5/RAC2/HRAS/CSF2/KLRD1/RAC3/NFATC1/FAS/IFNG/HCST/LCP2/PRF1/MICB/ICAM1/ITGB2/FYN/LCK/TYROBP/FCER1G/ULBP2/FCGR3B
KEGG_MEDICUS_REFERENCE_ORGANIZATION_OF_THE_OUTER_KINETOCHORE	KEGG_MEDICUS_REFERENCE_ORGANIZATION_OF_THE_OUTER_KINETOCHORE	KEGG_MEDICUS_REFERENCE_ORGANIZATION_OF_THE_OUTER_KINETOCHORE	16	-0.682657	-1.73415	0.00523774	0.0422567	0.0336781	2562	tags=62%, list=16%, signal=53%	ZWINT/INCENP/SPC25/MIS12/CENPW/AURKB/NUF2/CDCA8/BIRC5/NDC80
REACTOME_INFLUENZA_INFECTION	REACTOME_INFLUENZA_INFECTION	REACTOME_INFLUENZA_INFECTION	134	-0.376559	-1.45784	0.00525504	0.0422817	0.033698	4111	tags=46%, list=25%, signal=35%	CPSF4/KPNA4/RPS19/RPL29/RPL12/KPNA5/RPL36/RPL11/NUP98/NUP54/RPL24/CANX/RPS29/DNAJC3/NUP93/NUP37/KPNB1/NUP43/RPL23A/KPNA1/RPS16/NUP133/NUP205/RPL10A/RPL19/RPS8/NUP62/RPL35/NUP160/NUP50/UBA52/RPL8/NUP35/RPS18/RPL27/RPL26L1/RPS12/NUP155/FAU/RPL39L/CALR/SEC13/NUP210/POLR2E/RPS5/RPL41/POLR2A/POLR2I/POLR2G/PARP1/RAN/RPL36AL/NDC1/KPNA2/RPS4Y1/POLR2L/HSP90AA1/SEH1L/SLC25A6/RPL22L1/TGFB1/ISG15
PID_ATR_PATHWAY	PID_ATR_PATHWAY	PID_ATR_PATHWAY	37	-0.552521	-1.69037	0.00530926	0.0426029	0.033954	3863	tags=57%, list=24%, signal=43%	RAD1/PPP2CA/CDK2/FANCD2/TIMELESS/MDM2/NBN/MCM7/CHEK1/RFC5/RAD51/RFC4/RFC2/RPA1/RPA2/CLSPN/MCM2/CCNA2/PLK1/TIPIN/CDC6
WP_CHEMOKINE_SIGNALING_PATHWAY	WP_CHEMOKINE_SIGNALING_PATHWAY	WP_CHEMOKINE_SIGNALING_PATHWAY	162	-0.367064	-1.45512	0.0054032	0.0432401	0.0344618	1853	tags=25%, list=11%, signal=22%	AKT1/PIK3CD/STAT2/GNG10/CCR2/CX3CL1/GNAI3/AKT3/PIK3R5/RAC2/GNB5/HRAS/TIAM1/GNG11/NCF1/DOCK2/JAK2/GNAI2/CCL7/CCL21/LYN/GNB4/CXCR2/ADCY7/CXCL3/CXCL16/CCL26/CCL5/STAT1/CCR1/FGR/HCK/CXCL13/CXCR4/CXCL9/CCL4/CXCL11/PPBP/CXCL10/CXCL5
REACTOME_SARS_COV_2_ACTIVATES_MODULATES_INNATE_AND_ADAPTIVE_IMMUNE_RESPONSES	REACTOME_SARS_COV_2_ACTIVATES_MODULATES_INNATE_AND_ADAPTIVE_IMMUNE_RESPONSES	REACTOME_SARS_COV_2_ACTIVATES_MODULATES_INNATE_AND_ADAPTIVE_IMMUNE_RESPONSES	117	-0.400026	-1.52753	0.00545522	0.0434464	0.0346263	3539	tags=32%, list=22%, signal=25%	NUP133/NUP205/IFNAR2/UBB/HLA-B/HSP90AB1/CHUK/NUP62/TLR7/HLA-G/NUP160/NUP50/UBA52/NUP35/HLA-E/HLA-C/NUP155/TRAF3/SEC24A/SEC13/NUP210/HLA-F/STAT2/NLRP3/NDC1/IFIH1/KPNA2/RIPK2/HSP90AA1/IRF7/SEH1L/SEC24D/TLR1/TLR8/TLR2/STAT1/ISG15
REACTOME_GAB1_SIGNALOSOME	REACTOME_GAB1_SIGNALOSOME	REACTOME_GAB1_SIGNALOSOME	16	0.704739	1.71548	0.00545817	0.0434464	0.0346263	2033	tags=44%, list=13%, signal=38%	EREG/AREG/PIK3R1/GAB1/EGFR/SRC/HBEGF
REACTOME_PI3K_EVENTS_IN_ERBB2_SIGNALING	REACTOME_PI3K_EVENTS_IN_ERBB2_SIGNALING	REACTOME_PI3K_EVENTS_IN_ERBB2_SIGNALING	16	0.70413	1.714	0.00552514	0.0437506	0.0348687	2647	tags=44%, list=16%, signal=37%	EREG/PIK3R1/ERBB3/GAB1/EGFR/HBEGF/ERBB2
WP_DEVELOPMENT_AND_HETEROGENEITY_OF_THE_ILC_FAMILY	WP_DEVELOPMENT_AND_HETEROGENEITY_OF_THE_ILC_FAMILY	WP_DEVELOPMENT_AND_HETEROGENEITY_OF_THE_ILC_FAMILY	32	-0.559023	-1.6563	0.00552577	0.0437506	0.0348687	1985	tags=34%, list=12%, signal=30%	TNF/GFI1/IL23A/IL18/GATA3/AHR/EOMES/IL15/IFNG/IL1B/IL6
KEGG_CELL_CYCLE	KEGG_CELL_CYCLE	KEGG_CELL_CYCLE	122	-0.390581	-1.49943	0.00560992	0.0442144	0.0352383	3123	tags=34%, list=19%, signal=28%	ANAPC10/BUB1B/CDK1/CCNE2/MDM2/MCM7/CDKN2C/CHEK1/DBF4/BUB3/SMAD2/SKP2/TTK/CCND1/MCM3/TGFB2/GADD45B/YWHAE/CDKN1C/MCM6/TFDP1/MCM2/BUB1/CCNA2/SFN/MAD2L1/MCM5/MAD1L1/PTTG1/MCM4/PLK1/CDC45/ORC1/CDC27/CDKN2A/CDC6/CCNB1/TGFB3/CDC7/TGFB1/MAD2L2/CDC20
REACTOME_G_ALPHA_12_13_SIGNALLING_EVENTS	REACTOME_G_ALPHA_12_13_SIGNALLING_EVENTS	REACTOME_G_ALPHA_12_13_SIGNALLING_EVENTS	79	0.464525	1.56126	0.00561405	0.0442144	0.0352383	2556	tags=35%, list=16%, signal=30%	VAV3/GNG4/ROCK2/NGEF/ARHGEF10L/ARHGEF5/MCF2L/PLXNB1/ARHGEF9/KALRN/GNG12/ARHGEF40/ARHGEF19/ABR/SOS2/ARHGEF1/ARHGEF18/ARHGEF37/PLEKHG5/VAV2/FGD4/ARHGEF11/TRIO/AKAP13/GNG13/NET1/ARHGEF38/SOS1
KEGG_PPAR_SIGNALING_PATHWAY	KEGG_PPAR_SIGNALING_PATHWAY	KEGG_PPAR_SIGNALING_PATHWAY	66	0.479086	1.55939	0.00570003	0.0445459	0.0355025	1782	tags=29%, list=11%, signal=26%	FABP1/HMGCS2/PCK1/ACSL5/PPARG/ACOX2/FABP6/ACSL6/CYP27A1/ACOX1/FABP2/PPARA/SLC27A2/SORBS1/DBI/PDPK1/PCK2/LPL/EHHADH
PID_IL8_CXCR1_PATHWAY	PID_IL8_CXCR1_PATHWAY	PID_IL8_CXCR1_PATHWAY	27	-0.598098	-1.70379	0.00570103	0.0445459	0.0355025	2784	tags=48%, list=17%, signal=40%	GNB1/PRKCB/GNG2/PIK3CG/AKT1/CXCR1/GNAI2/LYN/DNM1/FGR/HCK/GNA15/CXCL8
REACTOME_TRANSLESION_SYNTHESIS_BY_Y_FAMILY_DNA_POLYMERASES_BYPASSES_LESIONS_ON_DNA_TEMPLATE	REACTOME_TRANSLESION_SYNTHESIS_BY_Y_FAMILY_DNA_POLYMERASES_BYPASSES_LESIONS_ON_DNA_TEMPLATE	REACTOME_TRANSLESION_SYNTHESIS_BY_Y_FAMILY_DNA_POLYMERASES_BYPASSES_LESIONS_ON_DNA_TEMPLATE	36	-0.549845	-1.67188	0.00570103	0.0445459	0.0355025	3464	tags=44%, list=21%, signal=35%	POLE3/UBB/POLD2/USP43/RFC1/POLD1/UBA52/RFC5/RFC4/RFC2/RPA1/RPA2/POLE2/MAD2L2/UBE2L6/ISG15
WP_NUCLEAR_RECEPTORS	WP_NUCLEAR_RECEPTORS	WP_NUCLEAR_RECEPTORS	38	0.56055	1.6359	0.0057603	0.0448911	0.0357777	3060	tags=42%, list=19%, signal=34%	NR1I2/PPARG/HNF4A/RORC/PPARA/ESRRA/NR5A2/VDR/NR1D2/NR4A1/THRB/RXRA/RARG/NR2F6/THRA/RARA
REACTOME_FORMATION_OF_PARAXIAL_MESODERM	REACTOME_FORMATION_OF_PARAXIAL_MESODERM	REACTOME_FORMATION_OF_PARAXIAL_MESODERM	63	-0.463583	-1.59538	0.00582525	0.0452788	0.0360866	3568	tags=49%, list=22%, signal=38%	PSMA5/PSMC5/PSMD13/NOG/LEF1/PSMB4/PSMB2/PSMB10/PSMD1/PSMD12/PSMA4/PSMD14/PSMA3/PSMA1/PSMD8/PSMB3/SNW1/PSMD9/PSMC4/FGFR1/PSMD2/PSMC1/PSMC3/PSMB8/BMP4/PSMB5/PSME1/PSMC6/PSMB6/MAMLD1/PSMB9
PID_CD8_TCR_PATHWAY	PID_CD8_TCR_PATHWAY	PID_CD8_TCR_PATHWAY	53	-0.478888	-1.59973	0.00585011	0.0453536	0.0361462	2105	tags=32%, list=13%, signal=28%	CD3E/CD3D/AKT1/MALT1/CD80/CD247/HRAS/MAP3K8/RASSF5/CD8A/RASGRP1/PTPRC/LCP2/CD86/PRF1/FYN/LCK
KEGG_MEDICUS_REFERENCE_PRE_IC_FORMATION	KEGG_MEDICUS_REFERENCE_PRE_IC_FORMATION	KEGG_MEDICUS_REFERENCE_PRE_IC_FORMATION	27	-0.596713	-1.69985	0.00587249	0.0454088	0.0361903	2765	tags=56%, list=17%, signal=46%	ORC5/POLE3/GINS4/MCM7/MCM3/CDT1/MCM6/GINS3/MCM2/MCM5/MCM4/CDC45/ORC1/POLE2/CDC6
WP_FOXP3_IN_COVID_19	WP_FOXP3_IN_COVID_19	WP_FOXP3_IN_COVID_19	15	-0.682147	-1.7051	0.00588828	0.045413	0.0361936	1745	tags=47%, list=11%, signal=42%	CD28/CD80/IL7R/IL2RA/IL2RB/CD86/IL6
WP_OXIDATIVE_DAMAGE_RESPONSE	WP_OXIDATIVE_DAMAGE_RESPONSE	WP_OXIDATIVE_DAMAGE_RESPONSE	39	-0.526052	-1.63359	0.00594446	0.0456204	0.0363589	2500	tags=38%, list=15%, signal=33%	TRAF3/NFKBIE/MAP3K9/MAP2K4/TNFRSF1B/TNF/CDKN1C/BAG4/C1R/C1S/C3AR1/C1QA/C1QC/C1QB/C5AR1
KEGG_METABOLISM_OF_XENOBIOTICS_BY_CYTOCHROME_P450	KEGG_METABOLISM_OF_XENOBIOTICS_BY_CYTOCHROME_P450	KEGG_METABOLISM_OF_XENOBIOTICS_BY_CYTOCHROME_P450	53	0.511479	1.59743	0.00595648	0.0456204	0.0363589	744	tags=17%, list=5%, signal=16%	UGT2B17/UGT2A3/ADH1C/CYP2B6/ADH6/CYP3A5/UGT2B15/CYP2S1/AKR1C3
REACTOME_ACTIVATION_OF_THE_PRE_REPLICATIVE_COMPLEX	REACTOME_ACTIVATION_OF_THE_PRE_REPLICATIVE_COMPLEX	REACTOME_ACTIVATION_OF_THE_PRE_REPLICATIVE_COMPLEX	33	-0.558196	-1.66437	0.00596115	0.0456204	0.0363589	2876	tags=55%, list=18%, signal=45%	PRIM1/MCM7/DBF4/PRIM2/MCM3/CDT1/RPA1/MCM6/RPA2/MCM2/MCM5/MCM4/CDC45/ORC1/POLE2/MCM10/CDC6/CDC7
KEGG_MEDICUS_REFERENCE_ANTEROGRADE_AXONAL_TRANSPORT	KEGG_MEDICUS_REFERENCE_ANTEROGRADE_AXONAL_TRANSPORT	KEGG_MEDICUS_REFERENCE_ANTEROGRADE_AXONAL_TRANSPORT	20	-0.639192	-1.68867	0.00607478	0.0463004	0.0369008	2082	tags=55%, list=13%, signal=48%	TUBB3/TUBA4A/TUBA1C/TUBB/TUBB2B/KLC1/TUBA1B/TUBA1A/KLC2/TUBB2A/TUBB6
WP_CARDIAC_PROGENITOR_DIFFERENTIATION	WP_CARDIAC_PROGENITOR_DIFFERENTIATION	WP_CARDIAC_PROGENITOR_DIFFERENTIATION	49	-0.506864	-1.66478	0.0060811	0.0463004	0.0369008	1700	tags=27%, list=11%, signal=24%	SOX17/BMP4/SIRPA/FGF2/TNNI3/ACTC1/ISL1/ROR2/THY1/TGFB1/DKK1/INHBA/CXCR4
PID_CDC42_REG_PATHWAY	PID_CDC42_REG_PATHWAY	PID_CDC42_REG_PATHWAY	30	0.590642	1.63945	0.00616165	0.046794	0.0372942	2560	tags=40%, list=16%, signal=34%	VAV3/DNMBP/NGEF/SPATA13/PLCG1/MCF2L/ARHGEF9/FARP2/VAV2/ITSN2/DOCK6/ARHGAP17
REACTOME_TERMINATION_OF_TRANSLESION_DNA_SYNTHESIS	REACTOME_TERMINATION_OF_TRANSLESION_DNA_SYNTHESIS	REACTOME_TERMINATION_OF_TRANSLESION_DNA_SYNTHESIS	30	-0.56613	-1.64378	0.00618676	0.0468651	0.0373509	3464	tags=50%, list=21%, signal=39%	POLE3/UBB/POLD2/USP43/RFC1/POLD1/UBA52/RFC5/RFC4/RFC2/RPA1/RPA2/POLE2/UBE2L6/ISG15
KEGG_DNA_REPLICATION	KEGG_DNA_REPLICATION	KEGG_DNA_REPLICATION	36	-0.547072	-1.66345	0.0062154	0.0469289	0.0374018	3464	tags=56%, list=21%, signal=44%	POLE3/POLD2/RFC1/POLD1/PRIM1/RNASEH2A/MCM7/RFC5/PRIM2/RFC4/MCM3/RFC2/RPA1/MCM6/RPA2/MCM2/MCM5/MCM4/FEN1/POLE2
KEGG_PATHWAYS_IN_CANCER	KEGG_PATHWAYS_IN_CANCER	KEGG_PATHWAYS_IN_CANCER	318	-0.302638	-1.29316	0.00622671	0.0469289	0.0374018	2500	tags=25%, list=15%, signal=22%	TRAF3/ITGB1/PML/LAMA4/WNT9A/PDGFB/EGLN1/PIK3R3/NOS2/SMAD2/FASLG/RALBP1/SKP2/PLCG2/RAD51/PIK3CG/WNT10A/FOS/FZD1/LAMC1/CCND1/PIAS2/TGFB2/AKT1/PIK3CD/GLI3/FGFR1/LAMC2/CKS1B/BMP4/NFKB2/TGFBR1/ITGAV/ETS1/GLI2/COL4A2/AKT3/FGF2/WNT5A/FGF7/PIK3R5/ITGA3/RAC2/HSP90B1/HRAS/LAMA5/BIRC5/KITLG/CSF2RA/WNT2/RAC3/LAMA2/HSP90AA1/CDKN2A/PDGFRB/RASSF5/COL4A1/GSTP1/FAS/MMP2/SPI1/BIRC3/FZD2/FN1/TGFB3/CSF1R/HIF1A/LAMB2…
REACTOME_RAF_INDEPENDENT_MAPK1_3_ACTIVATION	REACTOME_RAF_INDEPENDENT_MAPK1_3_ACTIVATION	REACTOME_RAF_INDEPENDENT_MAPK1_3_ACTIVATION	22	-0.63841	-1.71905	0.00624332	0.0469353	0.0374068	1378	tags=36%, list=9%, signal=33%	DUSP2/DUSP7/JAK2/DUSP6/DUSP10/DUSP5/IL6/DUSP4
REACTOME_PARACETAMOL_ADME	REACTOME_PARACETAMOL_ADME	REACTOME_PARACETAMOL_ADME	24	0.616904	1.6372	0.00655286	0.0490499	0.0390921	2699	tags=50%, list=17%, signal=42%	NAT2/GGT7/GGT6/UGT2B15/SULT1A1/ABCC5/ABCC3/NAT1/ABCC2/GGT1/ABCC1/GSTM1
WP_INTERLEUKIN_11_SIGNALING_PATHWAY	WP_INTERLEUKIN_11_SIGNALING_PATHWAY	WP_INTERLEUKIN_11_SIGNALING_PATHWAY	42	-0.521286	-1.65491	0.00655832	0.0490499	0.0390921	1853	tags=31%, list=11%, signal=27%	AKT1/RUNX2/HRAS/BIRC5/JAK2/SOCS3/PIAS3/IL11/TGFB1/IBSP/STAT1/ICAM1/FYN
REACTOME_DEGRADATION_OF_AXIN	REACTOME_DEGRADATION_OF_AXIN	REACTOME_DEGRADATION_OF_AXIN	51	-0.486825	-1.61906	0.00659719	0.0490499	0.0390921	3568	tags=55%, list=22%, signal=43%	PSMA5/PSMC5/PSMD13/UBB/PSMB4/PSMB2/PSMB10/PSMD1/PSMD12/PSMA4/UBA52/PSMD14/SMURF2/PSMA3/PSMA1/PSMD8/PSMB3/PSMD9/PSMC4/PSMD2/PSMC1/PSMC3/PSMB8/PSMB5/PSME1/PSMC6/PSMB6/PSMB9
REACTOME_SIGNALING_BY_NOTCH4	REACTOME_SIGNALING_BY_NOTCH4	REACTOME_SIGNALING_BY_NOTCH4	79	-0.430411	-1.5443	0.00662056	0.0490499	0.0390921	3568	tags=44%, list=22%, signal=35%	PSMA5/PSMC5/PSMD13/UBB/RBX1/PSMB4/PSMB2/PSMB10/PSMD1/PSMD12/PSMA4/UBA52/PSMD14/PSMA3/PSMA1/HEY2/ACTA2/PSMD8/PSMB3/SNW1/PSMD9/PSMC4/AKT1/PSMD2/PSMC1/PSMC3/TACC3/PSMB8/NOTCH2/PSMB5/PSME1/PSMC6/PSMB6/MAMLD1/PSMB9
KEGG_GLYCOSPHINGOLIPID_BIOSYNTHESIS_LACTO_AND_NEOLACTO_SERIES	KEGG_GLYCOSPHINGOLIPID_BIOSYNTHESIS_LACTO_AND_NEOLACTO_SERIES	KEGG_GLYCOSPHINGOLIPID_BIOSYNTHESIS_LACTO_AND_NEOLACTO_SERIES	25	0.606646	1.6352	0.00662089	0.0490499	0.0390921	2176	tags=32%, list=13%, signal=28%	FUT6/FUT3/B3GNT3/ABO/B3GALT1/FUT7/FUT2/B3GNT5
SIG_REGULATION_OF_THE_ACTIN_CYTOSKELETON_BY_RHO_GTPASES	SIG_REGULATION_OF_THE_ACTIN_CYTOSKELETON_BY_RHO_GTPASES	SIG_REGULATION_OF_THE_ACTIN_CYTOSKELETON_BY_RHO_GTPASES	33	-0.551049	-1.64306	0.00663759	0.0490499	0.0390921	1853	tags=27%, list=11%, signal=24%	AKT1/PAK6/PFN1/FLNC/CFL2/FLNA/ANGPTL2/WASF1/FSCN1
WP_OSTEOCLAST_SIGNALING	WP_OSTEOCLAST_SIGNALING	WP_OSTEOCLAST_SIGNALING	16	-0.671814	-1.70661	0.00663994	0.0490499	0.0390921	929	tags=31%, list=6%, signal=29%	GPR68/TNFRSF11B/ACP5/CTSK/SPP1
REACTOME_CYTOCHROME_P450_ARRANGED_BY_SUBSTRATE_TYPE	REACTOME_CYTOCHROME_P450_ARRANGED_BY_SUBSTRATE_TYPE	REACTOME_CYTOCHROME_P450_ARRANGED_BY_SUBSTRATE_TYPE	58	0.502773	1.60348	0.00675038	0.0497423	0.039644	1280	tags=22%, list=8%, signal=21%	CYP2B6/CYP4F2/CYP2W1/CYP4F12/CYP39A1/CYP27A1/CYP3A5/CYP2S1/CYP4F3/CYP4F11/CYP2D6/NR1H4/CYP2J2
WP_DEVELOPMENT_OF_PULMONARY_DENDRITIC_CELLS_AND_MACROPHAGE_SUBSETS	WP_DEVELOPMENT_OF_PULMONARY_DENDRITIC_CELLS_AND_MACROPHAGE_SUBSETS	WP_DEVELOPMENT_OF_PULMONARY_DENDRITIC_CELLS_AND_MACROPHAGE_SUBSETS	13	-0.715422	-1.71042	0.00678166	0.0498494	0.0397293	2533	tags=54%, list=16%, signal=45%	IKZF1/IRF8/TCF4/RUNX2/CSF2/BATF3/SPI1
REACTOME_SENSORY_PROCESSING_OF_SOUND	REACTOME_SENSORY_PROCESSING_OF_SOUND	REACTOME_SENSORY_PROCESSING_OF_SOUND	67	0.47905	1.56904	0.00681632	0.0499807	0.039834	2881	tags=31%, list=18%, signal=26%	ESPN/TPRN/CACNA1D/PLS1/USH1C/MPP1/DNAJC5/EPB41L1/CACNA2D2/PCLO/CIB2/CASK/CLIC5/CACNB2/EPS8L2/LHFPL5/EPS8/TRIOBP/SPTAN1/ESPNL/SYN1
REACTOME_TRANSCRIPTIONAL_REGULATION_BY_RUNX2	REACTOME_TRANSCRIPTIONAL_REGULATION_BY_RUNX2	REACTOME_TRANSCRIPTIONAL_REGULATION_BY_RUNX2	114	-0.396343	-1.51414	0.00685653	0.0501521	0.0399706	3442	tags=45%, list=21%, signal=35%	PSMC5/PSMD13/UBB/RBX1/PSMB4/PSMB2/PSMB10/PSMD1/PSMD12/CDK1/PSMA4/UBA52/PSMD14/PSMA3/PSMA1/HEY2/CBFB/SKP2/NKX3-2/PSMD8/CCND1/PSMB3/PSMD9/PSMC4/MAF/AKT1/GLI3/PSMD2/RUNX2/PSMC1/PSMC3/PSMB8/HIVEP3/GLI2/NR3C1/AKT3/PSMB5/ITGBL1/PSME1/PSMC6/TWIST2/ZNF521/PSMB6/CCNB1/WWTR1/MMP13/PSMB9/STAT1/ITGA5/COL1A1/TWIST1
KEGG_MEDICUS_VARIANT_MUTATION_CAUSED_ABERRANT_SNCA_TO_ANTEROGRADE_AXONAL_TRANSPORT	KEGG_MEDICUS_VARIANT_MUTATION_CAUSED_ABERRANT_SNCA_TO_ANTEROGRADE_AXONAL_TRANSPORT	KEGG_MEDICUS_VARIANT_MUTATION_CAUSED_ABERRANT_SNCA_TO_ANTEROGRADE_AXONAL_TRANSPORT	21	-0.622027	-1.65771	0.00699177	0.0510159	0.040659	2082	tags=52%, list=13%, signal=46%	TUBB3/TUBA4A/TUBA1C/TUBB/TUBB2B/KLC1/TUBA1B/TUBA1A/KLC2/TUBB2A/TUBB6
KEGG_MEDICUS_REFERENCE_ARL8_REGULATED_MICROTUBULE_PLUS_END_DIRECTED_TRANSPORT	KEGG_MEDICUS_REFERENCE_ARL8_REGULATED_MICROTUBULE_PLUS_END_DIRECTED_TRANSPORT	KEGG_MEDICUS_REFERENCE_ARL8_REGULATED_MICROTUBULE_PLUS_END_DIRECTED_TRANSPORT	27	-0.587443	-1.67344	0.00707269	0.0514007	0.0409657	2082	tags=44%, list=13%, signal=39%	TUBB3/TUBA4A/TUBA1C/TUBB/TUBB2B/KLC1/TUBA1B/BLOC1S2/TUBA1A/KLC2/TUBB2A/TUBB6
REACTOME_DUAL_INCISION_IN_GG_NER	REACTOME_DUAL_INCISION_IN_GG_NER	REACTOME_DUAL_INCISION_IN_GG_NER	40	-0.52581	-1.63961	0.0070891	0.0514007	0.0409657	4894	tags=65%, list=30%, signal=45%	GTF2H1/ERCC2/RPA3/POLE4/ERCC4/XPA/GTF2H5/PCNA/GTF2H4/ERCC1/POLE3/UBB/POLD2/RBX1/RFC1/POLD1/UBA52/RFC5/RFC4/RFC2/RPA1/DDB2/RPA2/PARP1/POLE2/PARP2
PID_S1P_S1P3_PATHWAY	PID_S1P_S1P3_PATHWAY	PID_S1P_S1P3_PATHWAY	29	-0.564603	-1.63548	0.00709631	0.0514007	0.0409657	2658	tags=52%, list=16%, signal=43%	GNAI1/PDGFB/GNAZ/GNA12/S1PR3/AKT1/S1PR1/ITGAV/GNAI3/AKT3/PDGFRB/JAK2/GNAI2/GNA15/CXCR4
WP_PPAR_SIGNALING_PATHWAY	WP_PPAR_SIGNALING_PATHWAY	WP_PPAR_SIGNALING_PATHWAY	65	0.484936	1.57465	0.00711526	0.0514129	0.0409755	1782	tags=29%, list=11%, signal=26%	FABP1/HMGCS2/PCK1/ACSL5/PPARG/ACOX2/FABP6/ACSL6/CYP27A1/ACOX1/FABP2/PPARA/SLC27A2/SORBS1/DBI/PDPK1/PCK2/LPL/EHHADH
SA_MMP_CYTOKINE_CONNECTION	SA_MMP_CYTOKINE_CONNECTION	SA_MMP_CYTOKINE_CONNECTION	14	-0.697904	-1.70919	0.00720354	0.0519248	0.0413834	3134	tags=64%, list=19%, signal=52%	TNFRSF8/CD44/TNFSF8/TNFRSF1B/TGFB2/TNF/TGFB1/SELL/IL1B
WP_CKAP4_SIGNALING_PATHWAY_MAP	WP_CKAP4_SIGNALING_PATHWAY_MAP	WP_CKAP4_SIGNALING_PATHWAY_MAP	103	-0.407144	-1.5352	0.00726085	0.0521102	0.0415311	2108	tags=26%, list=13%, signal=23%	CCND1/TGFB2/TNF/AKT1/SNAI1/SUSD2/TGFBR1/GLI2/BIRC5/CASP4/DKK3/FAS/MMP14/DUSP6/CCNB1/MIF/VIM/CD74/DKK1/STAT1/ANGPTL2/ITGA5/MMP9/SERPINE1/PLAU/TWIST1/MMP1
KEGG_MEDICUS_REFERENCE_PROMOTION_OF_MICROTUBULE_GROWTH	KEGG_MEDICUS_REFERENCE_PROMOTION_OF_MICROTUBULE_GROWTH	KEGG_MEDICUS_REFERENCE_PROMOTION_OF_MICROTUBULE_GROWTH	18	-0.645104	-1.67708	0.00726426	0.0521102	0.0415311	2082	tags=50%, list=13%, signal=44%	TUBB3/TUBA4A/TUBA1C/TUBB/TUBB2B/TUBA1B/TUBA1A/TUBB2A/TUBB6
KEGG_LONG_TERM_POTENTIATION	KEGG_LONG_TERM_POTENTIATION	KEGG_LONG_TERM_POTENTIATION	68	0.47044	1.54553	0.00732262	0.0524025	0.0417641	1006	tags=10%, list=6%, signal=10%	PLCB4/CHP2/PRKACB/RPS6KA6/RPS6KA3/ITPR2/PLCB1
KEGG_PROPANOATE_METABOLISM	KEGG_PROPANOATE_METABOLISM	KEGG_PROPANOATE_METABOLISM	31	0.580517	1.62333	0.00736545	0.0525826	0.0419076	3049	tags=42%, list=19%, signal=34%	ABAT/ACSS2/ACSS1/ALDH1B1/SUCLG2/ACACB/ALDH2/SUCLG1/EHHADH/MLYCD/HADHA/PCCA/ACADM
REACTOME_CARGO_CONCENTRATION_IN_THE_ER	REACTOME_CARGO_CONCENTRATION_IN_THE_ER	REACTOME_CARGO_CONCENTRATION_IN_THE_ER	33	-0.547963	-1.63386	0.00739857	0.0526927	0.0419954	2394	tags=39%, list=15%, signal=34%	STX5/CNIH3/SEC24A/TMED2/TMED10/MCFD2/CTSC/SERPINA1/LMAN1/CNIH1/SEC24D/COL7A1/F5
REACTOME_PURINERGIC_SIGNALING_IN_LEISHMANIASIS_INFECTION	REACTOME_PURINERGIC_SIGNALING_IN_LEISHMANIASIS_INFECTION	REACTOME_PURINERGIC_SIGNALING_IN_LEISHMANIASIS_INFECTION	26	-0.580631	-1.6427	0.00750025	0.0532894	0.042471	1541	tags=42%, list=10%, signal=38%	NFKB2/PSTPIP1/NLRP3/HMOX1/IL18/P2RX7/ENTPD1/C3/NT5E/C3AR1/IL1B
KEGG_MEDICUS_PATHOGEN_SALMONELLA_SIFA_TO_MICROTUBULE_PLUS_END_DIRECTED_TRANSPORT	KEGG_MEDICUS_PATHOGEN_SALMONELLA_SIFA_TO_MICROTUBULE_PLUS_END_DIRECTED_TRANSPORT	KEGG_MEDICUS_PATHOGEN_SALMONELLA_SIFA_TO_MICROTUBULE_PLUS_END_DIRECTED_TRANSPORT	21	-0.617995	-1.64696	0.007585	0.0537632	0.0428486	2082	tags=52%, list=13%, signal=46%	TUBB3/TUBA4A/TUBA1C/TUBB/TUBB2B/KLC1/TUBA1B/TUBA1A/KLC2/TUBB2A/TUBB6
KEGG_MEDICUS_VARIANT_MUTATION_CAUSED_ABERRANT_HTT_TO_ANTEROGRADE_AXONAL_TRANSPORT	KEGG_MEDICUS_VARIANT_MUTATION_CAUSED_ABERRANT_HTT_TO_ANTEROGRADE_AXONAL_TRANSPORT	KEGG_MEDICUS_VARIANT_MUTATION_CAUSED_ABERRANT_HTT_TO_ANTEROGRADE_AXONAL_TRANSPORT	22	-0.629654	-1.69547	0.00768734	0.0543592	0.0433236	2082	tags=50%, list=13%, signal=44%	TUBB3/TUBA4A/TUBA1C/TUBB/TUBB2B/KLC1/TUBA1B/TUBA1A/KLC2/TUBB2A/TUBB6
WP_CELL_CYCLE	WP_CELL_CYCLE	WP_CELL_CYCLE	118	-0.39098	-1.49141	0.00800081	0.0564417	0.0449833	2991	tags=33%, list=19%, signal=27%	CDK1/CCNE2/MDM2/MCM7/CDKN2C/CHEK1/DBF4/BUB3/SMAD2/SKP2/TTK/CCND1/MCM3/TGFB2/GADD45B/YWHAE/CDKN1C/MCM6/TFDP1/MCM2/BUB1/CCNA2/SFN/MCM5/MAD1L1/PTTG1/MCM4/PLK1/CDC45/ORC1/CDC27/CDKN2A/CDC6/CCNB1/TGFB3/CDC7/TGFB1/MAD2L2/CDC20
PID_SYNDECAN_2_PATHWAY	PID_SYNDECAN_2_PATHWAY	PID_SYNDECAN_2_PATHWAY	31	-0.546777	-1.59961	0.0080343	0.056544	0.0450649	1213	tags=29%, list=8%, signal=27%	HRAS/CSF2/MMP2/FN1/SDC2/TGFB1/CAV2/ITGA5/CXCL8
WP_FATTY_ACID_BETA_OXIDATION	WP_FATTY_ACID_BETA_OXIDATION	WP_FATTY_ACID_BETA_OXIDATION	33	0.556367	1.56205	0.00811674	0.0569895	0.0454199	3049	tags=48%, list=19%, signal=39%	ACSL5/ACSS2/ACSL6/ACADS/HADH/DECR1/SLC25A20/LPL/GK/DLD/HADHA/PNPLA2/CHKB/ACSL3/CPT1A/ACADM
REACTOME_TRANSCRIPTIONAL_REGULATION_BY_RUNX3	REACTOME_TRANSCRIPTIONAL_REGULATION_BY_RUNX3	REACTOME_TRANSCRIPTIONAL_REGULATION_BY_RUNX3	91	-0.416307	-1.53133	0.00822443	0.0575467	0.045864	3442	tags=45%, list=21%, signal=36%	PSMC5/PSMD13/UBB/LEF1/PSMB4/PSMB2/PSMB10/PSMD1/PSMD12/PSMA4/UBA52/MDM2/PSMD14/SMURF2/PSMA3/PSMA1/CBFB/PSMD8/CCND1/ITGA4/PSMB3/SNW1/PSMD9/PSMC4/PSMD2/ITGAL/PSMC1/PSMC3/RUNX3/PSMB8/PSMB5/TEAD4/PSME1/PSMC6/CDKN2A/PSMB6/MAMLD1/WWTR1/TGFB1/PSMB9/SPP1
REACTOME_REGULATION_OF_IFNA_IFNB_SIGNALING	REACTOME_REGULATION_OF_IFNA_IFNB_SIGNALING	REACTOME_REGULATION_OF_IFNA_IFNB_SIGNALING	24	-0.602751	-1.6721	0.00823476	0.0575467	0.045864	1820	tags=21%, list=11%, signal=19%	STAT2/SOCS1/SOCS3/USP18/STAT1
WP_ENDOPLASMIC_RETICULUM_STRESS_RESPONSE_IN_CORONAVIRUS_INFECTION	WP_ENDOPLASMIC_RETICULUM_STRESS_RESPONSE_IN_CORONAVIRUS_INFECTION	WP_ENDOPLASMIC_RETICULUM_STRESS_RESPONSE_IN_CORONAVIRUS_INFECTION	45	0.521354	1.57987	0.00844713	0.0588925	0.0469366	3400	tags=40%, list=21%, signal=32%	PPP1R14C/PPP1R14D/MAP1LC3A/PPP1R1B/PPP1R3D/PPP1R16A/BCL2/PPP1CB/PPP1R3B/PPP1R11/PPP1R13B/ATF6/PPP1R12C/PPP1R3E/EIF2AK1/PPP1R3F/PPP1R10/EIF2AK3
PID_LYMPH_ANGIOGENESIS_PATHWAY	PID_LYMPH_ANGIOGENESIS_PATHWAY	PID_LYMPH_ANGIOGENESIS_PATHWAY	24	-0.601503	-1.66864	0.00849077	0.0590584	0.0470688	2498	tags=46%, list=15%, signal=39%	ITGB1/ITGA1/MAP2K4/ITGA4/MAPK11/AKT1/FN1/VEGFC/ITGA5/COL1A2/COL1A1
WP_ABNORMAL_CALCIUM_HANDLING_AND_ITS_EFFECTS_ON_MUSCLE_CONTRACTION_IN_DMD	WP_ABNORMAL_CALCIUM_HANDLING_AND_ITS_EFFECTS_ON_MUSCLE_CONTRACTION_IN_DMD	WP_ABNORMAL_CALCIUM_HANDLING_AND_ITS_EFFECTS_ON_MUSCLE_CONTRACTION_IN_DMD	13	0.709759	1.62859	0.00879331	0.0610202	0.0486324	843	tags=23%, list=5%, signal=22%	TNNC2/CAPN3/DMD
KEGG_MEDICUS_REFERENCE_CCR_CXCR_GNB_G_PI3K_RAC_SIGNALING_PATHWAY	KEGG_MEDICUS_REFERENCE_CCR_CXCR_GNB_G_PI3K_RAC_SIGNALING_PATHWAY	KEGG_MEDICUS_REFERENCE_CCR_CXCR_GNB_G_PI3K_RAC_SIGNALING_PATHWAY	30	-0.548784	-1.59341	0.00883294	0.0611527	0.0487379	2877	tags=43%, list=18%, signal=36%	CCR8/GNB1/GNG2/PIK3CG/GNG10/PIK3R5/GNB5/GNG11/GNB4/CXCR2/CCL2/CCL4/CXCL8
REACTOME_DISSOLUTION_OF_FIBRIN_CLOT	REACTOME_DISSOLUTION_OF_FIBRIN_CLOT	REACTOME_DISSOLUTION_OF_FIBRIN_CLOT	13	-0.704395	-1.68406	0.00889649	0.0614285	0.0489577	329	tags=54%, list=2%, signal=53%	SERPINB8/SERPINB6/ANXA2/PLAUR/SERPINE1/PLAU/SERPINB2
WP_MEASLES_VIRUS_INFECTION	WP_MEASLES_VIRUS_INFECTION	WP_MEASLES_VIRUS_INFECTION	126	-0.382736	-1.47181	0.00891404	0.0614285	0.0489577	3228	tags=31%, list=20%, signal=25%	NFKBIA/CHUK/FADD/TLR7/IL1A/CCNE2/CD3G/ADAR/IRF9/CD28/TRAF3/CD209/PIK3R3/FASLG/JAK3/FOS/CCND1/CD3E/CD3D/PIK3CD/STAT2/NFKB2/HSPA2/IFIH1/EIF2S1/MSN/IRF7/OAS3/FAS/IL2RA/IL2RB/HSPA6/MX1/TLR2/STAT1/FCGR2B/OAS2/IL1B/IL6
KEGG_MATURITY_ONSET_DIABETES_OF_THE_YOUNG	KEGG_MATURITY_ONSET_DIABETES_OF_THE_YOUNG	KEGG_MATURITY_ONSET_DIABETES_OF_THE_YOUNG	23	0.612485	1.61597	0.00894031	0.0614426	0.048969	2707	tags=48%, list=17%, signal=40%	HNF1B/HNF4A/PKLR/FOXA2/NR5A2/FOXA3/HNF4G/HNF1A/MNX1/HES1/PDX1
WP_CODEINE_AND_MORPHINE_METABOLISM	WP_CODEINE_AND_MORPHINE_METABOLISM	WP_CODEINE_AND_MORPHINE_METABOLISM	10	0.767278	1.64381	0.00895737	0.0614426	0.048969	2060	tags=50%, list=13%, signal=44%	ABCB1/ABCC3/CYP2D6/CYP3A4/ABCC2
KEGG_PRIMARY_IMMUNODEFICIENCY	KEGG_PRIMARY_IMMUNODEFICIENCY	KEGG_PRIMARY_IMMUNODEFICIENCY	35	-0.531102	-1.596	0.00906712	0.0620525	0.0494551	2345	tags=40%, list=15%, signal=34%	BTK/JAK3/CD3E/CD4/CD3D/IL7R/ICOS/CD40/CD8A/TAP2/PTPRC/ADA/TAP1/LCK
KEGG_MEDICUS_VARIANT_MUTATION_INACTIVATED_PRKCG_TO_MGLUR1_TRPC3_SIGNALING_PATHWAY	KEGG_MEDICUS_VARIANT_MUTATION_INACTIVATED_PRKCG_TO_MGLUR1_TRPC3_SIGNALING_PATHWAY	KEGG_MEDICUS_VARIANT_MUTATION_INACTIVATED_PRKCG_TO_MGLUR1_TRPC3_SIGNALING_PATHWAY	11	0.774137	1.71358	0.0090993	0.0621298	0.0495167	1006	tags=27%, list=6%, signal=26%	PLCB4/ITPR2/PLCB1
REACTOME_METABOLISM_OF_STEROIDS	REACTOME_METABOLISM_OF_STEROIDS	REACTOME_METABOLISM_OF_STEROIDS	146	0.390712	1.43933	0.00924563	0.0629845	0.0501979	3691	tags=34%, list=23%, signal=26%	HSD11B2/SLC51B/ACOX2/SERPINA6/FABP6/CYP39A1/AMACR/CYP27A1/SLC51A/OSBPL2/PPARA/STARD5/ACACB/AKR1C3/ACOT8/VDR/SCAP/SLC27A2/ABCC3/NCOA6/CHD9/SREBF2/NR1H4/HSD17B11/CREBBP/MSMO1/EBP/OSBPL7/HSD17B4/HSD17B7/RXRA/NCOA2/CYP2R1/CYP11B2/SLC10A1/HMGCR/IDI1/SCP2/FDFT1/ARV1/SCD/HELZ2/SP1/CH25H/MVD/MVK/TM7SF2/HSD3B1/AKR1C1
REACTOME_CTLA4_INHIBITORY_SIGNALING	REACTOME_CTLA4_INHIBITORY_SIGNALING	REACTOME_CTLA4_INHIBITORY_SIGNALING	21	-0.609866	-1.6253	0.00945363	0.0642544	0.05121	1853	tags=38%, list=11%, signal=34%	AKT1/CD80/AKT3/CTLA4/LYN/CD86/FYN/LCK
KEGG_MEDICUS_REFERENCE_MICROTUBULE_NUCLEATION	KEGG_MEDICUS_REFERENCE_MICROTUBULE_NUCLEATION	KEGG_MEDICUS_REFERENCE_MICROTUBULE_NUCLEATION	23	-0.589614	-1.62702	0.00955834	0.0648182	0.0516593	2520	tags=43%, list=16%, signal=37%	NEDD1/TUBB3/TUBA4A/TUBA1C/TUBB/TUBB2B/TUBA1B/TUBA1A/TUBB2A/TUBB6
REACTOME_GLOBAL_GENOME_NUCLEOTIDE_EXCISION_REPAIR_GG_NER	REACTOME_GLOBAL_GENOME_NUCLEOTIDE_EXCISION_REPAIR_GG_NER	REACTOME_GLOBAL_GENOME_NUCLEOTIDE_EXCISION_REPAIR_GG_NER	82	-0.410248	-1.4842	0.00960723	0.0650016	0.0518055	4971	tags=54%, list=31%, signal=37%	ACTL6A/GTF2H1/ERCC2/COPS6/RPA3/TFPT/GPS1/YY1/POLE4/ERCC4/XPA/LIG1/GTF2H5/PCNA/GTF2H4/ERCC1/COPS2/CETN2/POLE3/UBB/POLD2/COPS4/RBX1/RFC1/POLD1/UBA52/COPS7A/RFC5/ACTB/RUVBL1/COPS8/INO80C/RFC4/RFC2/RPA1/DDB2/RPA2/PARP1/SUMO3/POLE2/PARP2/MNAT1/COPS3/PIAS3
WP_7_OXO_C_AND_7_BETA_HC_PATHWAYS	WP_7_OXO_C_AND_7_BETA_HC_PATHWAYS	WP_7_OXO_C_AND_7_BETA_HC_PATHWAYS	25	0.5879	1.58467	0.00970627	0.0654451	0.0521589	1038	tags=32%, list=6%, signal=30%	HSD11B2/ACOX2/EPHX2/AMACR/CYP27A1/ACOT11/ACOT8/SLC27A2
KEGG_WNT_SIGNALING_PATHWAY	KEGG_WNT_SIGNALING_PATHWAY	KEGG_WNT_SIGNALING_PATHWAY	146	0.38908	1.43331	0.00971674	0.0654451	0.0521589	2371	tags=23%, list=15%, signal=19%	PLCB4/CHP2/NKD1/AXIN2/PRKACB/WIF1/VANGL2/JUN/TCF7/CXXC4/NFATC2/ROCK2/AXIN1/CCND2/WNT5B/PLCB1/FZD5/FRAT2/WNT11/NFAT5/NKD2/SMAD3/LRP6/CREBBP/FRAT1/WNT4/FZD9/PRKCA/SFRP5/TCF7L2/FZD10/PPP2R5A/WNT2B
REACTOME_PCNA_DEPENDENT_LONG_PATCH_BASE_EXCISION_REPAIR	REACTOME_PCNA_DEPENDENT_LONG_PATCH_BASE_EXCISION_REPAIR	REACTOME_PCNA_DEPENDENT_LONG_PATCH_BASE_EXCISION_REPAIR	21	-0.607722	-1.61959	0.00979429	0.0658185	0.0524565	4730	tags=81%, list=29%, signal=57%	RPA3/POLE4/LIG1/PCNA/POLB/POLE3/POLD2/RFC1/APEX1/POLD1/RFC5/RFC4/RFC2/RPA1/RPA2/FEN1/POLE2
KEGG_INOSITOL_PHOSPHATE_METABOLISM	KEGG_INOSITOL_PHOSPHATE_METABOLISM	KEGG_INOSITOL_PHOSPHATE_METABOLISM	54	0.491241	1.53971	0.00984638	0.0660195	0.0526167	1268	tags=17%, list=8%, signal=15%	PLCB4/INPP5J/PIP5K1B/PLCG1/PLCD1/OCRL/PLCE1/PLCB1/PIK3C2B
KEGG_MEDICUS_PATHOGEN_HIV_GP120_TO_CXCR4_GNAI_PI3K_BAD_SIGNALING_PATHWAY	KEGG_MEDICUS_PATHOGEN_HIV_GP120_TO_CXCR4_GNAI_PI3K_BAD_SIGNALING_PATHWAY	KEGG_MEDICUS_PATHOGEN_HIV_GP120_TO_CXCR4_GNAI_PI3K_BAD_SIGNALING_PATHWAY	12	-0.715039	-1.67939	0.00999529	0.0668674	0.0532925	2658	tags=67%, list=16%, signal=56%	GNAI1/AKT1/PIK3CD/GNAI3/AKT3/GNAI2/CCR5/CXCR4
KEGG_MEDICUS_REFERENCE_TRH_TRHR_PLCB_PKC_SIGNALING_PATHWAY	KEGG_MEDICUS_REFERENCE_TRH_TRHR_PLCB_PKC_SIGNALING_PATHWAY	KEGG_MEDICUS_REFERENCE_TRH_TRHR_PLCB_PKC_SIGNALING_PATHWAY	12	0.730225	1.64814	0.0100571	0.06713	0.0535018	2064	tags=33%, list=13%, signal=29%	PLCB4/PLCB1/GNA11/PRKCA
REACTOME_UNWINDING_OF_DNA	REACTOME_UNWINDING_OF_DNA	REACTOME_UNWINDING_OF_DNA	12	-0.714194	-1.6774	0.0101578	0.0676506	0.0539167	2765	tags=75%, list=17%, signal=62%	GINS4/MCM7/MCM3/MCM6/GINS3/MCM2/MCM5/MCM4/CDC45
BIOCARTA_DC_PATHWAY	BIOCARTA_DC_PATHWAY	BIOCARTA_DC_PATHWAY	17	-0.654492	-1.68918	0.0102927	0.0682433	0.054389	3151	tags=53%, list=19%, signal=43%	CD33/TLR7/IL10/CSF2/CD40/CD7/CD2/IFNG/ITGAX
WP_CANONICAL_AND_NON_CANONICAL_TGF_B_SIGNALING	WP_CANONICAL_AND_NON_CANONICAL_TGF_B_SIGNALING	WP_CANONICAL_AND_NON_CANONICAL_TGF_B_SIGNALING	17	-0.654456	-1.68909	0.0102927	0.0682433	0.054389	1539	tags=41%, list=10%, signal=37%	SMAD2/TGFBR1/LOXL2/TGFB1/LOXL1/LOX/GREM1
KEGG_MEDICUS_REFERENCE_MACHR_CA2_APOPTOTIC_PATHWAY	KEGG_MEDICUS_REFERENCE_MACHR_CA2_APOPTOTIC_PATHWAY	KEGG_MEDICUS_REFERENCE_MACHR_CA2_APOPTOTIC_PATHWAY	20	0.634583	1.62006	0.0104344	0.0690009	0.0549929	1130	tags=25%, list=7%, signal=23%	PLCB4/ITPR2/PLCB1/CHRM3/CYCS
KEGG_STARCH_AND_SUCROSE_METABOLISM	KEGG_STARCH_AND_SUCROSE_METABOLISM	KEGG_STARCH_AND_SUCROSE_METABOLISM	34	0.558234	1.58384	0.0104738	0.0690009	0.0549929	1057	tags=24%, list=7%, signal=22%	ENPP3/UGT2B17/UGT2A3/PYGB/TREH/UGT2B15/SI/UGP2
BIOCARTA_FIBRINOLYSIS_PATHWAY	BIOCARTA_FIBRINOLYSIS_PATHWAY	BIOCARTA_FIBRINOLYSIS_PATHWAY	12	-0.713393	-1.67552	0.0104829	0.0690009	0.0549929	1212	tags=42%, list=8%, signal=39%	F13A1/F2R/SERPINE1/PLAU/SERPINB2
WP_ANTIVIRAL_AND_ANTI_INFLAMMATORY_EFFECTS_OF_NRF2_ON_SARS_COV_2_PATHWAY	WP_ANTIVIRAL_AND_ANTI_INFLAMMATORY_EFFECTS_OF_NRF2_ON_SARS_COV_2_PATHWAY	WP_ANTIVIRAL_AND_ANTI_INFLAMMATORY_EFFECTS_OF_NRF2_ON_SARS_COV_2_PATHWAY	28	-0.55549	-1.60152	0.0104996	0.0690009	0.0549929	360	tags=25%, list=2%, signal=24%	SLC7A11/IL1B/CCL2/IL6/MMP3/CXCL8/MMP1
KEGG_CITRATE_CYCLE_TCA_CYCLE	KEGG_CITRATE_CYCLE_TCA_CYCLE	KEGG_CITRATE_CYCLE_TCA_CYCLE	30	0.573082	1.59071	0.0105495	0.0691758	0.0551323	2059	tags=30%, list=13%, signal=26%	PCK1/PDHA1/SUCLG2/OGDHL/SUCLG1/ACO2/PCK2/PC/DLD
REACTOME_RECYCLING_PATHWAY_OF_L1	REACTOME_RECYCLING_PATHWAY_OF_L1	REACTOME_RECYCLING_PATHWAY_OF_L1	41	-0.490318	-1.54449	0.0105734	0.06918	0.0551356	2634	tags=49%, list=16%, signal=41%	KIF4A/RPS6KA2/AP2B1/L1CAM/ACTB/EZR/TUBB3/TUBA4A/AP2S1/TUBA1C/AP2M1/TUBB2B/TUBA1B/RDX/MSN/TUBA1A/DNM1/TUBB2A/DPYSL2/TUBB6
WP_FOLATE_METABOLISM	WP_FOLATE_METABOLISM	WP_FOLATE_METABOLISM	60	-0.462686	-1.57836	0.0106201	0.0693337	0.0552581	1985	tags=27%, list=12%, signal=23%	TNF/DHFR/SOD1/MTHFD1/NFKB2/SERPINA3/SHMT2/IFNG/MTHFD2/SOD2/GPX3/ICAM1/IL1B/SERPINE1/CCL2/IL6
REACTOME_ANCHORING_FIBRIL_FORMATION	REACTOME_ANCHORING_FIBRIL_FORMATION	REACTOME_ANCHORING_FIBRIL_FORMATION	15	-0.665516	-1.66353	0.0106921	0.0695624	0.0554403	1747	tags=40%, list=11%, signal=36%	LAMC2/COL4A2/COL4A1/COL7A1/COL1A2/COL1A1
REACTOME_ERBB2_ACTIVATES_PTK6_SIGNALING	REACTOME_ERBB2_ACTIVATES_PTK6_SIGNALING	REACTOME_ERBB2_ACTIVATES_PTK6_SIGNALING	13	0.701899	1.61056	0.0107019	0.0695624	0.0554403	2647	tags=46%, list=16%, signal=39%	EREG/PTK6/ERBB3/EGFR/HBEGF/ERBB2
KEGG_MEDICUS_VARIANT_MUTATION_CAUSED_ABERRANT_HTT_TO_MGLUR5_CA2_APOPTOTIC_PATHWAY	KEGG_MEDICUS_VARIANT_MUTATION_CAUSED_ABERRANT_HTT_TO_MGLUR5_CA2_APOPTOTIC_PATHWAY	KEGG_MEDICUS_VARIANT_MUTATION_CAUSED_ABERRANT_HTT_TO_MGLUR5_CA2_APOPTOTIC_PATHWAY	23	0.604963	1.59612	0.0107946	0.0699459	0.055746	1302	tags=22%, list=8%, signal=20%	PLCB4/ITPR2/PLCB1/CYCS/CASP7
BIOCARTA_ASBCELL_PATHWAY	BIOCARTA_ASBCELL_PATHWAY	BIOCARTA_ASBCELL_PATHWAY	11	-0.734528	-1.69731	0.0108079	0.0699459	0.055746	3008	tags=73%, list=19%, signal=59%	IL10/CD28/FASLG/CD4/CD80/CD40/FAS/HLA-DRA
PID_AURORA_B_PATHWAY	PID_AURORA_B_PATHWAY	PID_AURORA_B_PATHWAY	37	-0.528089	-1.61562	0.0108445	0.0700303	0.0558133	2949	tags=46%, list=18%, signal=38%	RACGAP1/STMN1/CENPA/PSMA3/INCENP/NCAPH/NPM1/AURKB/BUB1/CDCA8/NCAPG/BIRC5/KIF2C/KIF20A/DES/VIM/NDC80
KEGG_TASTE_TRANSDUCTION	KEGG_TASTE_TRANSDUCTION	KEGG_TASTE_TRANSDUCTION	43	0.513762	1.53975	0.0109389	0.070487	0.0561773	3881	tags=33%, list=24%, signal=25%	SCNN1B/PRKACB/SCNN1A/ADCY6/SCNN1G/GNG13/TAS2R4/TAS2R5/ASIC2/TRPM5/GNAS/TAS2R38/GRM4/GNB3
REACTOME_INTERACTIONS_OF_VPR_WITH_HOST_CELLULAR_PROTEINS	REACTOME_INTERACTIONS_OF_VPR_WITH_HOST_CELLULAR_PROTEINS	REACTOME_INTERACTIONS_OF_VPR_WITH_HOST_CELLULAR_PROTEINS	35	-0.522825	-1.57113	0.0111396	0.0716252	0.0570844	4626	tags=63%, list=29%, signal=45%	NUP98/NUP54/SLC25A4/NUP93/NUP37/NUP43/KPNA1/NUP133/NUP205/NUP62/NUP160/NUP50/BANF1/NUP35/NUP155/SEC13/PSIP1/NUP210/NDC1/HMGA1/SEH1L/SLC25A6
REACTOME_CLEC7A_DECTIN_1_SIGNALING	REACTOME_CLEC7A_DECTIN_1_SIGNALING	REACTOME_CLEC7A_DECTIN_1_SIGNALING	94	-0.406593	-1.50969	0.0113696	0.0729465	0.0581374	3568	tags=45%, list=22%, signal=35%	PSMA5/CCL22/PSMC5/PSMD13/UBB/NFKBIA/PSMB4/CHUK/PSMB2/PPP3CB/PSMB10/ITPR1/PSMD1/PSMD12/PSMA4/UBA52/PPP3CA/PSMD14/PSMA3/PSMA1/RELB/PPP3R1/PLCG2/PSMD8/PSMB3/PSMD9/PSMC4/MALT1/PSMD2/PSMC1/PSMC3/PSMB8/NFKB2/PSMB5/PSME1/UBE2M/PSMC6/NFATC1/PSMB6/PSMB9/CLEC7A/IL1B
WP_DIFFERENTIATION_OF_WHITE_AND_BROWN_ADIPOCYTE	WP_DIFFERENTIATION_OF_WHITE_AND_BROWN_ADIPOCYTE	WP_DIFFERENTIATION_OF_WHITE_AND_BROWN_ADIPOCYTE	25	0.575339	1.55081	0.0115061	0.0736637	0.0587091	1548	tags=28%, list=10%, signal=25%	PPARG/CEBPA/SMAD9/PPARGC1A/PPARGC1B/MPZL2/CEBPG
REACTOME_SIGNALING_BY_PDGF	REACTOME_SIGNALING_BY_PDGF	REACTOME_SIGNALING_BY_PDGF	58	-0.469497	-1.58936	0.0115472	0.0737683	0.0587924	1405	tags=28%, list=9%, signal=25%	COL4A2/HRAS/THBS4/PDGFRB/COL4A1/PDGFC/COL5A3/COL6A1/COL6A2/COL5A1/STAT1/COL6A3/COL3A1/COL5A2/THBS2/SPP1
WP_TGF_SMAD_SIGNALING_PATHWAY	WP_TGF_SMAD_SIGNALING_PATHWAY	WP_TGF_SMAD_SIGNALING_PATHWAY	11	-0.73159	-1.69052	0.0116205	0.0740776	0.0590389	1539	tags=55%, list=10%, signal=49%	SMAD2/TGFBR1/WWTR1/SPARC/SERPINE1/POSTN
REACTOME_RESOLUTION_OF_AP_SITES_VIA_THE_MULTIPLE_NUCLEOTIDE_PATCH_REPLACEMENT_PATHWAY	REACTOME_RESOLUTION_OF_AP_SITES_VIA_THE_MULTIPLE_NUCLEOTIDE_PATCH_REPLACEMENT_PATHWAY	REACTOME_RESOLUTION_OF_AP_SITES_VIA_THE_MULTIPLE_NUCLEOTIDE_PATCH_REPLACEMENT_PATHWAY	24	-0.593118	-1.64538	0.0117486	0.0747341	0.0595621	4730	tags=79%, list=29%, signal=56%	RPA3/POLE4/LIG1/PCNA/POLB/POLE3/POLD2/RFC1/APEX1/POLD1/RFC5/RFC4/RFC2/RPA1/RPA2/PARP1/FEN1/POLE2/PARP2
KEGG_MEDICUS_REFERENCE_REGULATION_OF_GF_RTK_RAS_ERK_SIGNALING_PTP	KEGG_MEDICUS_REFERENCE_REGULATION_OF_GF_RTK_RAS_ERK_SIGNALING_PTP	KEGG_MEDICUS_REFERENCE_REGULATION_OF_GF_RTK_RAS_ERK_SIGNALING_PTP	19	-0.637257	-1.69211	0.0117748	0.0747409	0.0595675	1519	tags=37%, list=9%, signal=33%	PTPN7/DUSP2/DUSP7/DUSP6/DUSP10/DUSP5/DUSP4
REACTOME_SYNTHESIS_OF_BILE_ACIDS_AND_BILE_SALTS	REACTOME_SYNTHESIS_OF_BILE_ACIDS_AND_BILE_SALTS	REACTOME_SYNTHESIS_OF_BILE_ACIDS_AND_BILE_SALTS	33	0.543205	1.52509	0.0118121	0.0748184	0.0596293	2328	tags=39%, list=14%, signal=34%	ACOX2/CYP39A1/AMACR/CYP27A1/OSBPL2/AKR1C3/ACOT8/SLC27A2/NR1H4/OSBPL7/HSD17B4/RXRA/NCOA2
REACTOME_ANTIGEN_PRESENTATION_FOLDING_ASSEMBLY_AND_PEPTIDE_LOADING_OF_CLASS_I_MHC	REACTOME_ANTIGEN_PRESENTATION_FOLDING_ASSEMBLY_AND_PEPTIDE_LOADING_OF_CLASS_I_MHC	REACTOME_ANTIGEN_PRESENTATION_FOLDING_ASSEMBLY_AND_PEPTIDE_LOADING_OF_CLASS_I_MHC	29	-0.543223	-1.57355	0.0118997	0.0750775	0.0598358	4444	tags=55%, list=28%, signal=40%	TAPBP/CANX/ATG14/PDIA3/HLA-B/HLA-G/HLA-E/HLA-C/CALR/SEC24A/SEC13/HLA-F/HSPA5/TAP2/SEC24D/TAP1
WP_17Q12_COPY_NUMBER_VARIATION_SYNDROME	WP_17Q12_COPY_NUMBER_VARIATION_SYNDROME	WP_17Q12_COPY_NUMBER_VARIATION_SYNDROME	79	-0.415143	-1.48952	0.0119058	0.0750775	0.0598358	640	tags=13%, list=4%, signal=12%	CCL7/DUSP14/CCL13/SLFN5/SLFN11/CCL5/CCL2/CCL4/CCL8/CCL18
KEGG_MEDICUS_REFERENCE_ANTIGEN_PROCESSING_AND_PRESENTATION_BY_MHC_CLASS_I_MOLECULES	KEGG_MEDICUS_REFERENCE_ANTIGEN_PROCESSING_AND_PRESENTATION_BY_MHC_CLASS_I_MOLECULES	KEGG_MEDICUS_REFERENCE_ANTIGEN_PROCESSING_AND_PRESENTATION_BY_MHC_CLASS_I_MOLECULES	12	-0.709286	-1.66588	0.0119456	0.0750775	0.0598358	3783	tags=83%, list=23%, signal=64%	TAPBP/PDIA3/HLA-B/HLA-G/HLA-E/HLA-C/CALR/HLA-F/TAP2/TAP1
WP_PROSTAGLANDIN_AND_LEUKOTRIENE_METABOLISM_IN_SENESCENCE_WP5321	WP_PROSTAGLANDIN_AND_LEUKOTRIENE_METABOLISM_IN_SENESCENCE_WP5321	WP_PROSTAGLANDIN_AND_LEUKOTRIENE_METABOLISM_IN_SENESCENCE_WP5321	32	-0.529897	-1.57	0.0119539	0.0750775	0.0598358	2084	tags=41%, list=13%, signal=35%	ALOX15B/MAPK11/DPEP2/PTGES/PTGIS/HRAS/IGFBP5/GGT5/PTGER2/ALOX5/ALOX5AP/PLA2G4A/PTGS2
WP_SEROTONIN_AND_ANXIETY_RELATED_EVENTS	WP_SEROTONIN_AND_ANXIETY_RELATED_EVENTS	WP_SEROTONIN_AND_ANXIETY_RELATED_EVENTS	13	-0.691428	-1.65306	0.0119979	0.0751955	0.0599299	3640	tags=54%, list=23%, signal=42%	HTR2A/PPP3CA/PRKCB/FOS/GRIN2D/ARC/PLEK
REACTOME_REGULATION_OF_EXPRESSION_OF_SLITS_AND_ROBOS	REACTOME_REGULATION_OF_EXPRESSION_OF_SLITS_AND_ROBOS	REACTOME_REGULATION_OF_EXPRESSION_OF_SLITS_AND_ROBOS	145	-0.346644	-1.35691	0.0120624	0.0754409	0.0601254	3568	tags=37%, list=22%, signal=29%	PSMA5/RPS16/RPL10A/RBM8A/PSMC5/PSMD13/UBB/RBX1/RPL19/PSMB4/PSMB2/RPS8/PSMB10/PSMD1/PSMD12/RPL35/PSMA4/ETF1/UBA52/RPL8/RPS18/ROBO3/RPL27/RPL26L1/PSMD14/PSMA3/RPS12/PSMA1/FAU/RPL39L/ROBO1/PSMD8/PSMB3/RPS5/EIF4A3/RPL41/PSMD9/PSMC4/MAGOHB/PSMD2/PSMC1/PSMC3/PSMB8/RPL36AL/PSMB5/PSME1/RPS4Y1/PSMC6/SLIT2/PSMB6/ISL1/RPL22L1/PSMB9
REACTOME_MITOCHONDRIAL_FATTY_ACID_BETA_OXIDATION	REACTOME_MITOCHONDRIAL_FATTY_ACID_BETA_OXIDATION	REACTOME_MITOCHONDRIAL_FATTY_ACID_BETA_OXIDATION	31	0.565723	1.58196	0.0121887	0.076071	0.0606276	3049	tags=45%, list=19%, signal=37%	ACSF2/ACSM3/ACOT11/PCTP/ACADS/HADH/ACAA2/DECR1/DBI/ACOT13/HADHA/PCCA/ACAD10/ACADM
REACTOME_UCH_PROTEINASES	REACTOME_UCH_PROTEINASES	REACTOME_UCH_PROTEINASES	80	-0.41695	-1.50574	0.0122428	0.0762277	0.0607526	3568	tags=44%, list=22%, signal=34%	PSMA5/PSMC5/PSMD13/UBB/PSMB4/PSMB2/PSMB10/PSMD1/PSMD12/PSMA4/UBA52/PSMD14/PSMA3/PSMA1/ACTB/RUVBL1/INO80C/UCHL5/PSMD8/PSMB3/PSMD9/PSMC4/PSMD2/PSMC1/PSMC3/PSMB8/TGFBR1/NEDD8/PSMB5/PSME1/UCHL1/PSMC6/PSMB6/TGFB1/PSMB9
KEGG_MEDICUS_VARIANT_MUTATION_CAUSED_ABERRANT_HTT_TO_RETROGRADE_AXONAL_TRANSPORT	KEGG_MEDICUS_VARIANT_MUTATION_CAUSED_ABERRANT_HTT_TO_RETROGRADE_AXONAL_TRANSPORT	KEGG_MEDICUS_VARIANT_MUTATION_CAUSED_ABERRANT_HTT_TO_RETROGRADE_AXONAL_TRANSPORT	41	-0.481109	-1.51549	0.0122651	0.0762277	0.0607526	2082	tags=27%, list=13%, signal=23%	TUBB3/TUBA4A/DNAL1/TUBA1C/DNAH2/TUBB/TUBB2B/TUBA1B/TUBA1A/TUBB2A/TUBB6
WP_ULCERATIVE_COLITIS_SIGNALING	WP_ULCERATIVE_COLITIS_SIGNALING	WP_ULCERATIVE_COLITIS_SIGNALING	18	-0.626951	-1.62989	0.012406	0.0767836	0.0611956	1985	tags=44%, list=12%, signal=39%	TNF/MAF/GATA3/NFATC1/IFNG/TGFB1/TLR2/HLA-DMA
WP_NEUROINFLAMMATION_AND_GLUTAMATERGIC_SIGNALING	WP_NEUROINFLAMMATION_AND_GLUTAMATERGIC_SIGNALING	WP_NEUROINFLAMMATION_AND_GLUTAMATERGIC_SIGNALING	138	-0.3596	-1.39588	0.0124061	0.0767836	0.0611956	2331	tags=25%, list=14%, signal=21%	SMAD2/LRRC8A/SLC38A2/TNFRSF1B/FOS/TGFB2/LRRC8E/TNF/SRR/AKT1/GRIN2D/NFKB2/TGFBR1/FGF2/ARC/LIF/SLC38A5/SHMT2/IL1R1/IFNG/TGFB3/IL10RA/IRS1/SOCS3/PSAT1/SLC2A1/TGFB1/SLC1A3/SLC1A1/STAT1/IL1B/SLC2A3/IL1R2/IL6
REACTOME_TELOMERE_C_STRAND_LAGGING_STRAND_SYNTHESIS	REACTOME_TELOMERE_C_STRAND_LAGGING_STRAND_SYNTHESIS	REACTOME_TELOMERE_C_STRAND_LAGGING_STRAND_SYNTHESIS	32	-0.527025	-1.56149	0.0124626	0.0769731	0.0613466	5077	tags=69%, list=31%, signal=47%	POLA2/TERF2/RPA3/DSCC1/LIG1/POT1/WRN/PCNA/CHTF18/POLD2/RFC1/POLD1/PRIM1/TINF2/RFC5/PRIM2/RFC4/RFC2/RPA1/RPA2/ACD/FEN1
WP_EICOSANOID_METABOLISM_VIA_LIPOOXYGENASES_LOX	WP_EICOSANOID_METABOLISM_VIA_LIPOOXYGENASES_LOX	WP_EICOSANOID_METABOLISM_VIA_LIPOOXYGENASES_LOX	25	0.573046	1.54463	0.0125346	0.0772575	0.0615733	2218	tags=44%, list=14%, signal=38%	DPEP1/CYP4F2/CYP4F12/ACOX2/ACOX1/PPARA/ALOX15/PTGR1/EHHADH/TRPA1/LTB4R2
REACTOME_CELL_DEATH_SIGNALLING_VIA_NRAGE_NRIF_AND_NADE	REACTOME_CELL_DEATH_SIGNALLING_VIA_NRAGE_NRIF_AND_NADE	REACTOME_CELL_DEATH_SIGNALLING_VIA_NRAGE_NRIF_AND_NADE	74	0.453898	1.50346	0.0126102	0.0775634	0.061817	3724	tags=41%, list=23%, signal=31%	VAV3/NGEF/ARHGEF10L/ARHGEF5/MCF2L/ARHGEF9/KALRN/ARHGEF40/ARHGEF19/ABR/SOS2/ARHGEF1/ARHGEF18/ARHGEF37/PLEKHG5/VAV2/FGD4/ARHGEF11/TRIO/AKAP13/NET1/ARHGEF38/SOS1/TRAF6/FGD1/SQSTM1/ARHGEF2/ARHGEF16/NGFR/ARHGEF7
WP_PANCREATIC_CANCER_SUBTYPES	WP_PANCREATIC_CANCER_SUBTYPES	WP_PANCREATIC_CANCER_SUBTYPES	43	-0.484808	-1.54562	0.0126385	0.0775768	0.0618277	512	tags=42%, list=3%, signal=41%	TNS4/AGR3/SLC2A1/S100A2/AGR2/KRT7/LEMD1/TFF1/SCEL/SPRR3/CST6/ANXA10/SPRR1B/KRT6A/CTSE/LYZ/TFF2/REG4
WP_REGULATION_OF_SISTER_CHROMATID_SEPARATION_AT_THE_METAPHASE_ANAPHASE_TRANSITION	WP_REGULATION_OF_SISTER_CHROMATID_SEPARATION_AT_THE_METAPHASE_ANAPHASE_TRANSITION	WP_REGULATION_OF_SISTER_CHROMATID_SEPARATION_AT_THE_METAPHASE_ANAPHASE_TRANSITION	14	-0.673663	-1.64982	0.0126787	0.0776635	0.0618968	3018	tags=57%, list=19%, signal=47%	BUB1B/CENPE/BUB3/BUB1/MAD2L1/MAD1L1/PTTG1/CDC20
WP_FATTY_ACID_BIOSYNTHESIS	WP_FATTY_ACID_BIOSYNTHESIS	WP_FATTY_ACID_BIOSYNTHESIS	22	0.615683	1.61466	0.0128225	0.0783828	0.0624701	2024	tags=45%, list=13%, signal=40%	ACSL5/ACSS2/ACSL6/ECHDC2/ACACB/HADH/ACAA2/DECR1/PECR/PC
REACTOME_DERMATAN_SULFATE_BIOSYNTHESIS	REACTOME_DERMATAN_SULFATE_BIOSYNTHESIS	REACTOME_DERMATAN_SULFATE_BIOSYNTHESIS	11	-0.720284	-1.66439	0.0129207	0.0788215	0.0628197	3080	tags=82%, list=19%, signal=66%	DSEL/CHST14/CSPG5/CSPG4/DSE/UST/DCN/VCAN/BGN
REACTOME_POST_CHAPERONIN_TUBULIN_FOLDING_PATHWAY	REACTOME_POST_CHAPERONIN_TUBULIN_FOLDING_PATHWAY	REACTOME_POST_CHAPERONIN_TUBULIN_FOLDING_PATHWAY	20	-0.604109	-1.59598	0.0130516	0.0794572	0.0633264	2579	tags=45%, list=16%, signal=38%	TBCA/TUBB3/TUBA4A/TUBA1C/TUBB2B/TUBA1B/TUBA1A/TUBB2A/TUBB6
REACTOME_TRIGLYCERIDE_CATABOLISM	REACTOME_TRIGLYCERIDE_CATABOLISM	REACTOME_TRIGLYCERIDE_CATABOLISM	22	0.615011	1.6129	0.0130855	0.0794807	0.0633451	800	tags=27%, list=5%, signal=26%	FABP1/PRKACB/FABP6/MGLL/FABP2/PNPLA4
WP_NRP1_TRIGGERED_SIGNALING_PATHWAYS_IN_PANCREATIC_CANCER	WP_NRP1_TRIGGERED_SIGNALING_PATHWAYS_IN_PANCREATIC_CANCER	WP_NRP1_TRIGGERED_SIGNALING_PATHWAYS_IN_PANCREATIC_CANCER	52	-0.455566	-1.52102	0.0131088	0.0794807	0.0633451	2331	tags=33%, list=14%, signal=28%	SMAD2/RELB/TGFB2/AKT1/SNAI1/NFKB2/TGFBR1/AKT3/CDH5/PECAM1/MMP2/TGFB3/NRP1/SNAI2/COL1A2/COL1A1/MMP9
KEGG_MEDICUS_REFERENCE_RETROGRADE_AXONAL_TRANSPORT	KEGG_MEDICUS_REFERENCE_RETROGRADE_AXONAL_TRANSPORT	KEGG_MEDICUS_REFERENCE_RETROGRADE_AXONAL_TRANSPORT	39	-0.494469	-1.53551	0.0133229	0.0806054	0.0642415	2082	tags=38%, list=13%, signal=34%	DNAH5/ACTR10/ACTR1A/DCTN6/TUBB3/TUBA4A/DNAL1/TUBA1C/DNAH2/TUBB/TUBB2B/TUBA1B/TUBA1A/TUBB2A/TUBB6
KEGG_MEDICUS_REFERENCE_MGLUR5_CA2_APOPTOTIC_PATHWAY	KEGG_MEDICUS_REFERENCE_MGLUR5_CA2_APOPTOTIC_PATHWAY	KEGG_MEDICUS_REFERENCE_MGLUR5_CA2_APOPTOTIC_PATHWAY	22	0.613447	1.60879	0.0133485	0.0806054	0.0642415	1302	tags=23%, list=8%, signal=21%	PLCB4/ITPR2/PLCB1/CYCS/CASP7
WP_OLIGODENDROCYTE_SPECIFICATION_AND_DIFFERENTIATION_LEADING_TO_MYELIN_COMPONENTS_FOR_CNS	WP_OLIGODENDROCYTE_SPECIFICATION_AND_DIFFERENTIATION_LEADING_TO_MYELIN_COMPONENTS_FOR_CNS	WP_OLIGODENDROCYTE_SPECIFICATION_AND_DIFFERENTIATION_LEADING_TO_MYELIN_COMPONENTS_FOR_CNS	28	-0.541727	-1.56184	0.0134019	0.0807642	0.0643681	2443	tags=36%, list=15%, signal=30%	PDGFB/TNF/CXCL2/BMP4/GLI2/FGF2/LIF/SOX8/CXCL1/IL1B
REACTOME_MYD88_INDEPENDENT_TLR4_CASCADE	REACTOME_MYD88_INDEPENDENT_TLR4_CASCADE	REACTOME_MYD88_INDEPENDENT_TLR4_CASCADE	104	-0.386482	-1.45727	0.0134722	0.0810237	0.0645749	2169	tags=28%, list=13%, signal=24%	NFKBIA/CHUK/MAP2K1/FADD/MAPKAPK2/UBA52/RPS6KA2/TRAF3/MAP2K4/FOS/NKIRAS1/MAPK11/S100B/NFKB2/RIPK2/USP14/TIFA/NLRC5/MAP3K8/DUSP7/IRF7/DUSP6/BIRC3/S100A12/USP18/IKBIP/CD14/LY96/DUSP4
REACTOME_SIGNALING_BY_SCF_KIT	REACTOME_SIGNALING_BY_SCF_KIT	REACTOME_SIGNALING_BY_SCF_KIT	43	-0.482537	-1.53838	0.0135101	0.0810877	0.0646259	1213	tags=40%, list=8%, signal=37%	FES/VAV1/SOCS6/FER/CHEK1/PIK3R3/SH2B3/HRAS/KITLG/SOCS1/PTPRU/JAK2/LYN/STAT1/FYN/LCK/MMP9
REACTOME_INTERACTIONS_OF_REV_WITH_HOST_CELLULAR_PROTEINS	REACTOME_INTERACTIONS_OF_REV_WITH_HOST_CELLULAR_PROTEINS	REACTOME_INTERACTIONS_OF_REV_WITH_HOST_CELLULAR_PROTEINS	35	-0.517482	-1.55507	0.0135574	0.081208	0.0647217	4067	tags=60%, list=25%, signal=45%	NUP98/NUP54/NUP93/NUP37/KPNB1/NUP43/NUP133/NUP205/NUP62/RANGAP1/NUP160/NUP50/NUP35/NUP155/SEC13/NUP210/RCC1/NPM1/RAN/NDC1/SEH1L
REACTOME_CYTOPROTECTION_BY_HMOX1	REACTOME_CYTOPROTECTION_BY_HMOX1	REACTOME_CYTOPROTECTION_BY_HMOX1	59	0.473054	1.52015	0.0137	0.0817732	0.0651722	3891	tags=46%, list=24%, signal=35%	FABP1/STAP2/PTK6/PPARA/NCOA6/CYCS/CHD9/COX19/COX5A/NFE2L2/LRPPRC/CREBBP/HM13/RXRA/NCOA2/COX5B/ABCC1/COX20/COX4I1/NCOR2/COX6A1/HELZ2/MAFK/COX7B/SIN3A/COX6C/COX14
WP_A_NETWORK_MAP_OF_MACROPHAGE_STIMULATING_PROTEIN_MSP_SIGNALING	WP_A_NETWORK_MAP_OF_MACROPHAGE_STIMULATING_PROTEIN_MSP_SIGNALING	WP_A_NETWORK_MAP_OF_MACROPHAGE_STIMULATING_PROTEIN_MSP_SIGNALING	82	-0.401793	-1.45361	0.0137067	0.0817732	0.0651722	2813	tags=34%, list=17%, signal=28%	SIX1/KDR/PRKCB/ITGB1/ACTA2/RPS6KB1/SMAD2/LDHA/FZD1/CDH2/TNF/AKT1/FGFR1/PARP1/HSPB1/ZEB2/PDGFRB/COL4A1/FN1/VIM/SLC2A1/TGFB1/CXCL1/MMP9/IL1B/DUSP4/CXCL5/CXCL8
WP_CHOLESTEROL_BIOSYNTHESIS_PATHWAY_IN_HEPATOCYTES	WP_CHOLESTEROL_BIOSYNTHESIS_PATHWAY_IN_HEPATOCYTES	WP_CHOLESTEROL_BIOSYNTHESIS_PATHWAY_IN_HEPATOCYTES	39	0.516955	1.51571	0.013804	0.0821888	0.0655035	3563	tags=41%, list=22%, signal=32%	HMGCS2/ABCG1/CYP27A1/MYLIP/MSMO1/EBP/HSD17B7/HMGCR/IDI1/ACSL3/FDFT1/SCD/CH25H/MVD/MVK/TM7SF2
REACTOME_PKR_MEDIATED_SIGNALING	REACTOME_PKR_MEDIATED_SIGNALING	REACTOME_PKR_MEDIATED_SIGNALING	63	-0.441765	-1.52029	0.0139925	0.083145	0.0662655	3003	tags=49%, list=19%, signal=40%	FANCL/DNAJC3/TARBP2/TUBB4B/FANCE/PPP2CA/FANCB/SNCA/CHUK/FANCG/CDK1/DHX9/ADAR/ILF2/FANCM/TUBB3/PTPN2/TUBA4A/NPM1/TUBA1C/HSPA2/EIF2S1/TUBB2B/TUBA1B/TUBA1A/TUBB2A/STAT1/UBE2L6/TUBB6/ISG15/SPHK1
REACTOME_SUMOYLATION_OF_DNA_REPLICATION_PROTEINS	REACTOME_SUMOYLATION_OF_DNA_REPLICATION_PROTEINS	REACTOME_SUMOYLATION_OF_DNA_REPLICATION_PROTEINS	43	-0.480986	-1.53343	0.014033	0.0831701	0.0662855	4124	tags=51%, list=26%, signal=38%	PCNA/NUP93/NUP37/NUP43/NUP133/NUP205/NUP62/RANGAP1/NUP160/NUP50/NUP35/NUP155/INCENP/SEC13/NUP210/AURKB/SUMO3/NDC1/CDCA8/BIRC5/SEH1L/PIAS3
REACTOME_FORMATION_OF_TUBULIN_FOLDING_INTERMEDIATES_BY_CCT_TRIC	REACTOME_FORMATION_OF_TUBULIN_FOLDING_INTERMEDIATES_BY_CCT_TRIC	REACTOME_FORMATION_OF_TUBULIN_FOLDING_INTERMEDIATES_BY_CCT_TRIC	21	-0.59434	-1.58392	0.0140526	0.0831701	0.0662855	2125	tags=67%, list=13%, signal=58%	CCT4/CCT6A/TUBB4B/CCT7/CCT8/CCT2/TUBB3/TUBA4A/TUBA1C/TUBB2B/TUBA1B/TUBA1A/TUBB2A/TUBB6
REACTOME_CYTOSOLIC_SULFONATION_OF_SMALL_MOLECULES	REACTOME_CYTOSOLIC_SULFONATION_OF_SMALL_MOLECULES	REACTOME_CYTOSOLIC_SULFONATION_OF_SMALL_MOLECULES	19	0.64139	1.61056	0.0142808	0.0843532	0.0672285	1700	tags=42%, list=11%, signal=38%	SLC26A2/SULT1B1/SULT1A1/SULT1A2/SULT4A1/SLC35B3/PAPSS2/SLC26A1
WP_NOVEL_INTRACELLULAR_COMPONENTS_OF_RIG_I_LIKE_RECEPTOR_PATHWAY	WP_NOVEL_INTRACELLULAR_COMPONENTS_OF_RIG_I_LIKE_RECEPTOR_PATHWAY	WP_NOVEL_INTRACELLULAR_COMPONENTS_OF_RIG_I_LIKE_RECEPTOR_PATHWAY	57	-0.442829	-1.49768	0.0144161	0.0848754	0.0676447	3489	tags=33%, list=22%, signal=26%	MAP3K1/PIN1/NFKBIA/CHUK/FADD/MAPK12/IFNE/TRAF3/DDX3Y/MAPK11/TNF/SNW1/IFIH1/IRF7/IFNG/RNF125/ISG15/CXCL10/CXCL8
WP_GDNF_RET_SIGNALING_AXIS	WP_GDNF_RET_SIGNALING_AXIS	WP_GDNF_RET_SIGNALING_AXIS	22	-0.598864	-1.61256	0.0144263	0.0848754	0.0676447	2214	tags=36%, list=14%, signal=31%	SOX11/GLI3/SOX17/BMP4/GATA3/SLIT2/FOXC1/GREM1
WP_LDL_INFLUENCE_ON_CD14_AND_TLR4	WP_LDL_INFLUENCE_ON_CD14_AND_TLR4	WP_LDL_INFLUENCE_ON_CD14_AND_TLR4	24	-0.583471	-1.61862	0.0144927	0.0850984	0.0678224	3207	tags=50%, list=20%, signal=40%	CREB3/IL10/MAPK12/RELB/MAPK11/AKT1/NFKB2/CREB3L1/CD14/IL1B/CCL2/IL6
REACTOME_REVERSIBLE_HYDRATION_OF_CARBON_DIOXIDE	REACTOME_REVERSIBLE_HYDRATION_OF_CARBON_DIOXIDE	REACTOME_REVERSIBLE_HYDRATION_OF_CARBON_DIOXIDE	11	0.747903	1.65551	0.0149884	0.0878353	0.0700036	941	tags=36%, list=6%, signal=34%	CA4/CA12/CA1/CA7
REACTOME_CELL_EXTRACELLULAR_MATRIX_INTERACTIONS	REACTOME_CELL_EXTRACELLULAR_MATRIX_INTERACTIONS	REACTOME_CELL_EXTRACELLULAR_MATRIX_INTERACTIONS	17	-0.628363	-1.62175	0.0150684	0.0879517	0.0700964	3051	tags=53%, list=19%, signal=43%	LIMS1/ITGB1/ACTB/ACTN1/ARHGEF6/PARVB/FLNC/FERMT2/FLNA
REACTOME_SUMOYLATION_OF_TRANSCRIPTION_FACTORS	REACTOME_SUMOYLATION_OF_TRANSCRIPTION_FACTORS	REACTOME_SUMOYLATION_OF_TRANSCRIPTION_FACTORS	19	-0.62894	-1.67002	0.0150684	0.0879517	0.0700964	2814	tags=53%, list=17%, signal=44%	MDM2/HIC1/MTA1/PIAS2/SUMO3/CDKN2A/PIAS3/TFAP2C/MITF/TFAP2A
WP_FATTY_ACID_TRANSPORTERS	WP_FATTY_ACID_TRANSPORTERS	WP_FATTY_ACID_TRANSPORTERS	17	0.63537	1.56355	0.0150969	0.0879517	0.0700964	1220	tags=35%, list=8%, signal=33%	FABP1/ACSL5/FABP6/ACSL6/FABP2/DBI
REACTOME_BETA_OXIDATION_OF_VERY_LONG_CHAIN_FATTY_ACIDS	REACTOME_BETA_OXIDATION_OF_VERY_LONG_CHAIN_FATTY_ACIDS	REACTOME_BETA_OXIDATION_OF_VERY_LONG_CHAIN_FATTY_ACIDS	11	0.745876	1.65103	0.0152634	0.0887481	0.0707311	3029	tags=64%, list=19%, signal=52%	ACOX1/ACOT8/DECR2/EHHADH/MLYCD/HSD17B4/ACAA1
REACTOME_NUCLEAR_IMPORT_OF_REV_PROTEIN	REACTOME_NUCLEAR_IMPORT_OF_REV_PROTEIN	REACTOME_NUCLEAR_IMPORT_OF_REV_PROTEIN	32	-0.518295	-1.53563	0.015345	0.0889572	0.0708978	4067	tags=62%, list=25%, signal=47%	NUP98/NUP54/NUP93/NUP37/KPNB1/NUP43/NUP133/NUP205/NUP62/NUP160/NUP50/NUP35/NUP155/SEC13/NUP210/RCC1/NPM1/RAN/NDC1/SEH1L
WP_PLURIPOTENT_STEM_CELL_DIFFERENTIATION_PATHWAY	WP_PLURIPOTENT_STEM_CELL_DIFFERENTIATION_PATHWAY	WP_PLURIPOTENT_STEM_CELL_DIFFERENTIATION_PATHWAY	46	-0.472327	-1.5223	0.0153786	0.0889572	0.0708978	1576	tags=33%, list=10%, signal=30%	CXCR1/BMP4/FGF2/WNT5A/KITLG/FST/WNT2/TGFB3/CSF1R/IL11/TGFB1/NT5E/DKK1/INHBA/IL6
WP_NUCLEOTIDE_EXCISION_REPAIR	WP_NUCLEOTIDE_EXCISION_REPAIR	WP_NUCLEOTIDE_EXCISION_REPAIR	42	-0.491105	-1.55909	0.0154214	0.0889572	0.0708978	4894	tags=62%, list=30%, signal=43%	GTF2H1/ERCC2/RPA3/POLE4/ERCC4/XPA/LIG1/GTF2H5/PCNA/GTF2H4/ERCC1/ERCC8/CETN2/POLE3/POLD2/RBX1/RFC1/POLD1/RFC5/RFC4/RFC2/RPA1/DDB2/RPA2/POLE2/MNAT1
KEGG_MEDICUS_REFERENCE_MGLUR1_TRPC3_SIGNALING_PATHWAY	KEGG_MEDICUS_REFERENCE_MGLUR1_TRPC3_SIGNALING_PATHWAY	KEGG_MEDICUS_REFERENCE_MGLUR1_TRPC3_SIGNALING_PATHWAY	13	0.685663	1.5733	0.0154815	0.0889572	0.0708978	1006	tags=23%, list=6%, signal=22%	PLCB4/ITPR2/PLCB1
KEGG_LEUKOCYTE_TRANSENDOTHELIAL_MIGRATION	KEGG_LEUKOCYTE_TRANSENDOTHELIAL_MIGRATION	KEGG_LEUKOCYTE_TRANSENDOTHELIAL_MIGRATION	111	-0.377436	-1.43546	0.0155075	0.0889572	0.0708978	2703	tags=38%, list=17%, signal=32%	JAM2/PRKCB/GNAI1/ITGB1/ACTB/PIK3R3/EZR/PLCG2/VCL/ITK/PIK3CG/MYL12A/ACTN1/MYL9/ITGA4/MAPK11/PIK3CD/ITGAL/JAM3/RHOH/GNAI3/PIK3R5/RAC2/CDH5/NCF1/MSN/RASSF5/ESAM/PECAM1/GNAI2/MMP2/VCAM1/CD99/THY1/CYBB/ICAM1/ITGB2/MMP9/CLDN18/ITGAM/CXCR4/NCF2
REACTOME_EICOSANOIDS	REACTOME_EICOSANOIDS	REACTOME_EICOSANOIDS	11	0.74405	1.64699	0.0155384	0.0889572	0.0708978	1144	tags=36%, list=7%, signal=34%	CYP4F2/CYP4F12/CYP4F3/CYP4F11
WP_BIOMARKERS_FOR_UREA_CYCLE_DISORDERS	WP_BIOMARKERS_FOR_UREA_CYCLE_DISORDERS	WP_BIOMARKERS_FOR_UREA_CYCLE_DISORDERS	12	0.705351	1.592	0.0155384	0.0889572	0.0708978	1254	tags=50%, list=8%, signal=46%	F10/F7/ASL/GPT/GATM/OTC
WP_ENTEROHEPATIC_CIRCULATION_OF_BILE_ACIDS	WP_ENTEROHEPATIC_CIRCULATION_OF_BILE_ACIDS	WP_ENTEROHEPATIC_CIRCULATION_OF_BILE_ACIDS	12	0.704868	1.59091	0.0155384	0.0889572	0.0708978	1056	tags=42%, list=7%, signal=39%	SLC51B/ABCB1/FABP6/SLC51A/ABCC3
REACTOME_FORMATION_OF_INCISION_COMPLEX_IN_GG_NER	REACTOME_FORMATION_OF_INCISION_COMPLEX_IN_GG_NER	REACTOME_FORMATION_OF_INCISION_COMPLEX_IN_GG_NER	41	-0.473997	-1.49308	0.0156485	0.0894156	0.0712631	5232	tags=56%, list=32%, signal=38%	USP45/UBE2N/DDB1/GTF2H1/ERCC2/RPA3/ERCC4/XPA/GTF2H5/GTF2H4/ERCC1/CETN2/UBB/RBX1/UBA52/RPA1/DDB2/RPA2/PARP1/SUMO3/PARP2/MNAT1/PIAS3
KEGG_DRUG_METABOLISM_OTHER_ENZYMES	KEGG_DRUG_METABOLISM_OTHER_ENZYMES	KEGG_DRUG_METABOLISM_OTHER_ENZYMES	37	0.532344	1.54336	0.0157963	0.0900875	0.0717986	509	tags=19%, list=3%, signal=18%	UGT2B17/UGT2A3/NAT2/CES2/XDH/CYP3A5/UGT2B15
WP_PPAR_ALPHA_PATHWAY	WP_PPAR_ALPHA_PATHWAY	WP_PPAR_ALPHA_PATHWAY	25	0.565283	1.52371	0.015891	0.0902858	0.0719566	3165	tags=48%, list=20%, signal=39%	FABP1/PPARA/DBI/KLK15/EHHADH/RXRA/SCP2/CPT1A/ACAA1/ACADM/MYC/APOA1
BIOCARTA_TOB1_PATHWAY	BIOCARTA_TOB1_PATHWAY	BIOCARTA_TOB1_PATHWAY	19	-0.622437	-1.65276	0.0158918	0.0902858	0.0719566	2872	tags=58%, list=18%, signal=48%	CD3G/CD28/CD3E/TGFB2/CD3D/TGFBR1/CD247/IL2RA/IFNG/TGFB3/TGFB1
REACTOME_GLYCOSAMINOGLYCAN_METABOLISM	REACTOME_GLYCOSAMINOGLYCAN_METABOLISM	REACTOME_GLYCOSAMINOGLYCAN_METABOLISM	123	-0.37083	-1.42674	0.0160217	0.0907943	0.0723619	2892	tags=36%, list=18%, signal=30%	CHST14/SLC9A1/CSPG5/CD44/HSPG2/LYVE1/CSGALNACT1/B3GALT6/PRELP/ARSB/ST3GAL1/CHST2/CHST1/HS3ST1/HMMR/FMOD/HS3ST2/PAPSS1/CSPG4/GPC1/ST3GAL6/CHPF/HS3ST3B1/GNS/CHST7/CHST6/CHSY3/DSE/HS6ST2/CHSY1/CHST3/GPC6/HYAL1/UST/CSGALNACT2/SDC2/HPSE/DCN/CHST15/HS3ST3A1/VCAN/CHST11/LUM/BGN
WP_11P11_2_COPY_NUMBER_VARIATION_SYNDROME	WP_11P11_2_COPY_NUMBER_VARIATION_SYNDROME	WP_11P11_2_COPY_NUMBER_VARIATION_SYNDROME	52	-0.452095	-1.50943	0.0160423	0.0907943	0.0723619	2535	tags=31%, list=16%, signal=26%	SYT13/ITGB1/ITGA4/CD4/CHST1/GLI3/CD82/ITGA3/CHST6/CD53/C11orf96/HLA-DMB/TIMP1/HLA-DMA/ITGB2/HLA-DRA
REACTOME_DEFENSINS	REACTOME_DEFENSINS	REACTOME_DEFENSINS	24	0.582973	1.54716	0.0161988	0.0915061	0.0729292	149	tags=12%, list=1%, signal=12%	DEFA6/DEFA5/DEFB1
REACTOME_XENOBIOTICS	REACTOME_XENOBIOTICS	REACTOME_XENOBIOTICS	22	0.608743	1.59646	0.0165203	0.0931394	0.074231	1930	tags=32%, list=12%, signal=28%	CYP2B6/CYP2W1/CYP3A5/CYP2S1/CYP2D6/CYP2J2/CYP3A4
WP_CORI_CYCLE	WP_CORI_CYCLE	WP_CORI_CYCLE	17	-0.624573	-1.61197	0.0165505	0.0931394	0.074231	2780	tags=65%, list=17%, signal=54%	HK1/TPI1/PGK1/LDHA/GPI/G6PD/ALDOA/GAPDH/PFKP/PGAM1/SLC2A1
WP_DISORDERS_OF_FOLATE_METABOLISM_AND_TRANSPORT	WP_DISORDERS_OF_FOLATE_METABOLISM_AND_TRANSPORT	WP_DISORDERS_OF_FOLATE_METABOLISM_AND_TRANSPORT	18	-0.612373	-1.59199	0.0166257	0.0932895	0.0743506	1980	tags=33%, list=12%, signal=29%	DHFR/MTHFD1/ALDH1L2/SHMT2/MTHFD2/TYMS
REACTOME_SRP_DEPENDENT_COTRANSLATIONAL_PROTEIN_TARGETING_TO_MEMBRANE	REACTOME_SRP_DEPENDENT_COTRANSLATIONAL_PROTEIN_TARGETING_TO_MEMBRANE	REACTOME_SRP_DEPENDENT_COTRANSLATIONAL_PROTEIN_TARGETING_TO_MEMBRANE	93	-0.397291	-1.4721	0.0166398	0.0932895	0.0743506	3540	tags=37%, list=22%, signal=29%	RPS16/SEC11A/RPL10A/RPL19/RPS8/RPL35/SRP68/UBA52/SSR2/SRPRB/SEC61A1/RPL8/RPS18/RPL27/RPL26L1/RPS12/DDOST/FAU/RPL39L/SEC61G/RPS5/SRP19/RPL41/SEC11C/SRP72/RPN1/TRAM1/SSR1/SRP54/SPCS3/RPL36AL/RPS4Y1/SSR3/RPL22L1
REACTOME_APC_CDC20_MEDIATED_DEGRADATION_OF_NEK2A	REACTOME_APC_CDC20_MEDIATED_DEGRADATION_OF_NEK2A	REACTOME_APC_CDC20_MEDIATED_DEGRADATION_OF_NEK2A	25	-0.544108	-1.50573	0.0168053	0.093808	0.0747638	3720	tags=52%, list=23%, signal=40%	ANAPC11/UBB/CDC23/ANAPC10/BUB1B/UBA52/UBE2E1/BUB3/MAD2L1/NEK2/CDC27/CDC20/UBE2S
KEGG_OTHER_GLYCAN_DEGRADATION	KEGG_OTHER_GLYCAN_DEGRADATION	KEGG_OTHER_GLYCAN_DEGRADATION	14	0.690352	1.61302	0.0168207	0.093808	0.0747638	1398	tags=36%, list=9%, signal=33%	ENGASE/NEU4/MAN2C1/NEU1/FUCA1
REACTOME_IL_6_TYPE_CYTOKINE_RECEPTOR_LIGAND_INTERACTIONS	REACTOME_IL_6_TYPE_CYTOKINE_RECEPTOR_LIGAND_INTERACTIONS	REACTOME_IL_6_TYPE_CYTOKINE_RECEPTOR_LIGAND_INTERACTIONS	16	-0.630943	-1.60278	0.0168268	0.093808	0.0747638	1269	tags=31%, list=8%, signal=29%	LIF/JAK2/IL11/OSMR/OSM
REACTOME_NEF_MEDIATES_DOWN_MODULATION_OF_CELL_SURFACE_RECEPTORS_BY_RECRUITING_THEM_TO_CLATHRIN_ADAPTERS	REACTOME_NEF_MEDIATES_DOWN_MODULATION_OF_CELL_SURFACE_RECEPTORS_BY_RECRUITING_THEM_TO_CLATHRIN_ADAPTERS	REACTOME_NEF_MEDIATES_DOWN_MODULATION_OF_CELL_SURFACE_RECEPTORS_BY_RECRUITING_THEM_TO_CLATHRIN_ADAPTERS	21	-0.585147	-1.55942	0.0171186	0.095256	0.0759179	2511	tags=38%, list=16%, signal=32%	CD28/AP2B1/CD4/AP2S1/AP1S2/AP2M1/AP1S3/LCK
WP_T_CELL_ACTIVATION_SARS_COV_2	WP_T_CELL_ACTIVATION_SARS_COV_2	WP_T_CELL_ACTIVATION_SARS_COV_2	87	-0.401177	-1.46209	0.0172798	0.0959738	0.0764899	3228	tags=43%, list=20%, signal=34%	NFKBIA/CHUK/MAP2K1/ITPR1/CCL19/STAT4/CD3G/IL12RB1/CD28/IL12RB2/FOS/CCND1/CD3E/TNF/IRF2BPL/CD4/CD3D/AKT1/PIK3CD/MALT1/CD80/ICOS/IL23A/CD247/CTLA4/HRAS/CDKN2A/NFATC1/JAK2/RASGRP1/IFNG/PTPRC/LCP2/CD86/FYN/LCK/HLA-DRA
REACTOME_THYROXINE_BIOSYNTHESIS	REACTOME_THYROXINE_BIOSYNTHESIS	REACTOME_THYROXINE_BIOSYNTHESIS	10	0.742605	1.59095	0.017445	0.0966768	0.0770502	125	tags=20%, list=1%, signal=20%	DUOX2/IYD
REACTOME_TRANSLESION_SYNTHESIS_BY_POLH	REACTOME_TRANSLESION_SYNTHESIS_BY_POLH	REACTOME_TRANSLESION_SYNTHESIS_BY_POLH	18	-0.611181	-1.58889	0.0174713	0.0966768	0.0770502	4928	tags=72%, list=30%, signal=50%	POLH/RPA3/RCHY1/PCNA/SPRTN/UBB/RFC1/UBA52/RFC5/RFC4/RFC2/RPA1/RPA2
REACTOME_C_TYPE_LECTIN_RECEPTORS_CLRS	REACTOME_C_TYPE_LECTIN_RECEPTORS_CLRS	REACTOME_C_TYPE_LECTIN_RECEPTORS_CLRS	131	-0.358709	-1.38534	0.0176508	0.0973297	0.0775705	3568	tags=44%, list=22%, signal=34%	PSMA5/CCL22/PSMC5/PSMD13/UBB/NFKBIA/PSMB4/CHUK/PSMB2/PPP3CB/PSMB10/ITPR1/PSMD1/PSMD12/PSMA4/UBA52/PPP3CA/CLEC4D/PSMD14/PSMA3/PSMA1/CD209/ICAM2/RELB/PPP3R1/PLCG2/MUC17/PSMD8/PSMB3/PSMD9/PSMC4/MUC16/MALT1/PSMD2/PSMC1/PSMC3/PSMB8/NFKB2/PSMB5/MUC5B/HRAS/PSME1/UBE2M/PSMC6/MUC6/NFATC1/PSMB6/CLEC4A/LYN/CLEC4E/MUC1/PSMB9/CLEC7A/MUC5AC/FYN/IL1B/FCER1G
REACTOME_ANTIMICROBIAL_PEPTIDES	REACTOME_ANTIMICROBIAL_PEPTIDES	REACTOME_ANTIMICROBIAL_PEPTIDES	65	-0.431405	-1.48892	0.0176547	0.0973297	0.0775705	588	tags=14%, list=4%, signal=13%	SLC11A1/TLR1/TLR2/SEMG1/GNLY/S100A9/PLA2G2A/LYZ/S100A8
REACTOME_DEFECTIVE_CFTR_CAUSES_CYSTIC_FIBROSIS	REACTOME_DEFECTIVE_CFTR_CAUSES_CYSTIC_FIBROSIS	REACTOME_DEFECTIVE_CFTR_CAUSES_CYSTIC_FIBROSIS	57	-0.434658	-1.47005	0.0178081	0.097994	0.0781	3568	tags=47%, list=22%, signal=37%	PSMA5/PSMC5/PSMD13/UBB/PSMB4/PSMB2/PSMB10/PSMD1/PSMD12/PSMA4/UBA52/PSMD14/PSMA3/PSMA1/PSMD8/PSMB3/PSMD9/PSMC4/PSMD2/PSMC1/PSMC3/PSMB8/PSMB5/PSME1/PSMC6/PSMB6/PSMB9
KEGG_MEDICUS_REFERENCE_ITGA_B_TALIN_VINCULIN_SIGNALING_PATHWAY	KEGG_MEDICUS_REFERENCE_ITGA_B_TALIN_VINCULIN_SIGNALING_PATHWAY	KEGG_MEDICUS_REFERENCE_ITGA_B_TALIN_VINCULIN_SIGNALING_PATHWAY	28	-0.532166	-1.53427	0.0180148	0.0989485	0.0788607	2645	tags=46%, list=16%, signal=39%	ITGB7/ITGB1/ACTB/ITGA1/ITGA7/VCL/ACTN1/ITGA4/ITGA11/ITGAV/ITGA3/FN1/ITGA5
REACTOME_NCAM1_INTERACTIONS	REACTOME_NCAM1_INTERACTIONS	REACTOME_NCAM1_INTERACTIONS	42	-0.482454	-1.53163	0.0185279	0.101579	0.0809575	868	tags=29%, list=5%, signal=27%	COL4A2/NRTN/COL4A1/ST8SIA4/COL5A3/PRNP/COL6A1/COL6A2/COL5A1/COL6A3/COL3A1/COL5A2
WP_PATHWAYS_AFFECTED_IN_ADENOID_CYSTIC_CARCINOMA	WP_PATHWAYS_AFFECTED_IN_ADENOID_CYSTIC_CARCINOMA	WP_PATHWAYS_AFFECTED_IN_ADENOID_CYSTIC_CARCINOMA	61	0.456556	1.47136	0.0187315	0.102331	0.0815563	4494	tags=49%, list=28%, signal=36%	CEBPA/FOXO3/MYB/FGFR4/NOTCH1/DTX4/KANSL1/NFIB/KMT2C/MAGI1/CREBBP/JMJD1C/BRD1/ATRX/KDM6A/ERBB2/MGA/MYC/KAT6A/MAML3/BCORL1/MYCN/SRCAP/ATM/ARID1A/SMARCA2/BCOR/RAF1/SMARCE1/ARID4B
REACTOME_SENSORY_PERCEPTION_OF_TASTE	REACTOME_SENSORY_PERCEPTION_OF_TASTE	REACTOME_SENSORY_PERCEPTION_OF_TASTE	40	0.520685	1.53166	0.0187337	0.102331	0.0815563	4216	tags=35%, list=26%, signal=26%	SCNN1B/TRPM4/SCNN1A/KCNJ2/SCNN1G/GNG13/TAS2R4/TAS2R5/TRPM5/TAS2R38/GRM4/GNB3/SCN3A/ITPR3
KEGG_MEDICUS_REFERENCE_TYPE_II_INTERFERON_TO_JAK_STAT_SIGNALING_PATHWAY	KEGG_MEDICUS_REFERENCE_TYPE_II_INTERFERON_TO_JAK_STAT_SIGNALING_PATHWAY	KEGG_MEDICUS_REFERENCE_TYPE_II_INTERFERON_TO_JAK_STAT_SIGNALING_PATHWAY	19	-0.611342	-1.6233	0.019032	0.10377	0.0827033	883	tags=21%, list=5%, signal=20%	IFNGR1/JAK2/IFNG/STAT1
KEGG_MEDICUS_VARIANT_MUTATION_CAUSED_ABERRANT_SPTBN2_TO_MGLUR1_TRPC3_SIGNALING_PATHWAY	KEGG_MEDICUS_VARIANT_MUTATION_CAUSED_ABERRANT_SPTBN2_TO_MGLUR1_TRPC3_SIGNALING_PATHWAY	KEGG_MEDICUS_VARIANT_MUTATION_CAUSED_ABERRANT_SPTBN2_TO_MGLUR1_TRPC3_SIGNALING_PATHWAY	10	0.737661	1.58035	0.0191197	0.104057	0.0829322	1006	tags=30%, list=6%, signal=28%	PLCB4/ITPR2/PLCB1
PID_FCER1_PATHWAY	PID_FCER1_PATHWAY	PID_FCER1_PATHWAY	58	-0.451317	-1.52781	0.0191816	0.104144	0.0830013	2687	tags=34%, list=17%, signal=29%	PRKCB/FER/BTK/ITK/MAP2K4/FOS/LAT2/AKT1/S1PR1/PTPN13/HRAS/WIPF1/LYN/HCLS1/LCP2/FCGR2B/FYN/FCER1G/SPHK1/PLA2G4A
KEGG_MEDICUS_REFERENCE_BRANCHING_MICROTUBULE_NUCLEATION	KEGG_MEDICUS_REFERENCE_BRANCHING_MICROTUBULE_NUCLEATION	KEGG_MEDICUS_REFERENCE_BRANCHING_MICROTUBULE_NUCLEATION	27	-0.546106	-1.55568	0.0192205	0.104144	0.0830013	3989	tags=52%, list=25%, signal=39%	TUBB4B/HAUS3/HAUS6/HAUS8/NEDD1/TUBB3/TUBA4A/TUBA1C/TUBB/TUBB2B/TUBA1B/TUBA1A/TUBB2A/TUBB6
PID_IL6_7_PATHWAY	PID_IL6_7_PATHWAY	PID_IL6_7_PATHWAY	47	-0.464152	-1.50439	0.0192405	0.104144	0.0830013	2169	tags=34%, list=13%, signal=30%	MAP2K4/FOS/MAPK11/CEBPD/AKT1/HSP90B1/JAK2/IRF1/SOCS3/PIAS3/LMO4/MITF/STAT1/TIMP1/HCK/IL6
REACTOME_NUCLEAR_ENVELOPE_NE_REASSEMBLY	REACTOME_NUCLEAR_ENVELOPE_NE_REASSEMBLY	REACTOME_NUCLEAR_ENVELOPE_NE_REASSEMBLY	68	-0.414095	-1.4461	0.0193303	0.10444	0.083237	4067	tags=51%, list=25%, signal=39%	NUP93/TUBB4B/NUP37/KPNB1/NUP43/PPP2CA/AHCTF1/NUP133/ANKLE2/NUP205/NUP62/RANGAP1/TMPO/NUP160/CDK1/LMNA/BANF1/NUP35/NUP155/SEC13/TUBB3/VRK2/TUBA4A/RCC1/TUBA1C/RAN/NDC1/TUBB2B/TUBA1B/VRK1/TUBA1A/SEH1L/CCNB1/TUBB2A/TUBB6
WP_OSTEOBLAST_SIGNALING	WP_OSTEOBLAST_SIGNALING	WP_OSTEOBLAST_SIGNALING	13	-0.664611	-1.58895	0.0195212	0.10528	0.0839071	1521	tags=46%, list=9%, signal=42%	PDGFB/ITGAV/PDGFRB/TNFRSF11B/IBSP/COL1A1
REACTOME_REGULATION_OF_LIPID_METABOLISM_BY_PPARALPHA	REACTOME_REGULATION_OF_LIPID_METABOLISM_BY_PPARALPHA	REACTOME_REGULATION_OF_LIPID_METABOLISM_BY_PPARALPHA	112	0.393302	1.40901	0.0197975	0.106577	0.0849406	3331	tags=30%, list=21%, signal=24%	FABP1/HMGCS2/PPARG/AGT/PEX11A/PPARGC1A/ACOX1/PPARA/ESRRA/MED13/NCOA3/NCOA6/CHD9/PPARGC1B/SREBF2/NR1H4/PLIN2/MED12/MED13L/CREBBP/MED14/NPAS2/CDK19/RXRA/NCOA2/HMGCR/MED23/NCOR2/CPT1A/ACADM/FDFT1/APOA1/HELZ2/SP1
WP_INFLAMMATORY_BOWEL_DISEASE_SIGNALING	WP_INFLAMMATORY_BOWEL_DISEASE_SIGNALING	WP_INFLAMMATORY_BOWEL_DISEASE_SIGNALING	42	-0.478856	-1.52021	0.0199131	0.107006	0.0852826	3013	tags=45%, list=19%, signal=37%	IL1A/IL10/STAT4/IL12RB1/TLR5/SMAD2/TNF/MAF/IL23A/IL21R/IL18/GATA3/NFATC1/IFNG/TGFB1/TLR2/STAT1/HLA-DMA/IL6
KEGG_MEDICUS_VARIANT_MUTATION_CAUSED_ABERRANT_ABETA_TO_MACHR_CA2_APOPTOTIC_PATHWAY	KEGG_MEDICUS_VARIANT_MUTATION_CAUSED_ABERRANT_ABETA_TO_MACHR_CA2_APOPTOTIC_PATHWAY	KEGG_MEDICUS_VARIANT_MUTATION_CAUSED_ABERRANT_ABETA_TO_MACHR_CA2_APOPTOTIC_PATHWAY	21	0.605986	1.57773	0.0199918	0.107235	0.0854652	1130	tags=24%, list=7%, signal=22%	PLCB4/ITPR2/PLCB1/CHRM3/CYCS
WP_TGF_BETA_RECEPTOR_SIGNALING_IN_SKELETAL_DYSPLASIAS	WP_TGF_BETA_RECEPTOR_SIGNALING_IN_SKELETAL_DYSPLASIAS	WP_TGF_BETA_RECEPTOR_SIGNALING_IN_SKELETAL_DYSPLASIAS	55	-0.441023	-1.48384	0.0200603	0.107409	0.0856038	2146	tags=40%, list=13%, signal=35%	SMAD2/FOS/THBS1/TNF/LTBP3/RUNX2/RUNX3/BMP4/TGFBR1/LIF/HRAS/FST/ZEB2/ENG/IFNG/BAMBI/TGFB1/FBN1/STAT1/INHBA/SERPINE1/SPP1
REACTOME_RECYCLING_OF_BILE_ACIDS_AND_SALTS	REACTOME_RECYCLING_OF_BILE_ACIDS_AND_SALTS	REACTOME_RECYCLING_OF_BILE_ACIDS_AND_SALTS	18	0.629993	1.57936	0.0201343	0.107612	0.0857655	2805	tags=50%, list=17%, signal=41%	SLC51B/FABP6/SLC51A/STARD5/ABCC3/NR1H4/RXRA/NCOA2/SLC10A1
REACTOME_CS_DS_DEGRADATION	REACTOME_CS_DS_DEGRADATION	REACTOME_CS_DS_DEGRADATION	14	-0.649191	-1.58989	0.0202218	0.107886	0.0859835	2191	tags=50%, list=14%, signal=43%	CSPG5/ARSB/CSPG4/HYAL1/DCN/VCAN/BGN
REACTOME_INTERLEUKIN_2_FAMILY_SIGNALING	REACTOME_INTERLEUKIN_2_FAMILY_SIGNALING	REACTOME_INTERLEUKIN_2_FAMILY_SIGNALING	44	-0.464017	-1.4829	0.020385	0.108562	0.0865226	2396	tags=39%, list=15%, signal=33%	PIK3R3/JAK3/IL3RA/IL9R/PIK3CD/IL15RA/IL21R/CSF2/CSF2RA/IL15/JAK2/IL2RA/IL2RB/HAVCR2/STAT1/CSF2RB/LCK
REACTOME_SYNTHESIS_OF_BILE_ACIDS_AND_BILE_SALTS_VIA_7ALPHA_HYDROXYCHOLESTEROL	REACTOME_SYNTHESIS_OF_BILE_ACIDS_AND_BILE_SALTS_VIA_7ALPHA_HYDROXYCHOLESTEROL	REACTOME_SYNTHESIS_OF_BILE_ACIDS_AND_BILE_SALTS_VIA_7ALPHA_HYDROXYCHOLESTEROL	23	0.581835	1.5351	0.0206309	0.109675	0.08741	2328	tags=43%, list=14%, signal=37%	ACOX2/AMACR/CYP27A1/AKR1C3/ACOT8/SLC27A2/NR1H4/HSD17B4/RXRA/NCOA2
KEGG_ENDOMETRIAL_CANCER	KEGG_ENDOMETRIAL_CANCER	KEGG_ENDOMETRIAL_CANCER	52	0.459505	1.433	0.0207091	0.109877	0.0875703	2647	tags=31%, list=16%, signal=26%	AXIN2/TCF7/FOXO3/CDH1/MLH1/PIK3R1/AXIN1/CTNNA2/EGFR/PDPK1/SOS2/TCF7L2/PIK3CB/MAPK3/SOS1/ERBB2
REACTOME_TRYPTOPHAN_CATABOLISM	REACTOME_TRYPTOPHAN_CATABOLISM	REACTOME_TRYPTOPHAN_CATABOLISM	12	-0.680166	-1.59748	0.0207426	0.109877	0.0875703	1811	tags=50%, list=11%, signal=44%	KMO/SLC36A4/SLC7A5/KYNU/TDO2/IDO1
REACTOME_REGULATION_OF_KIT_SIGNALING	REACTOME_REGULATION_OF_KIT_SIGNALING	REACTOME_REGULATION_OF_KIT_SIGNALING	16	-0.619508	-1.57373	0.0208252	0.110038	0.0876992	1657	tags=38%, list=10%, signal=34%	SH2B3/KITLG/SOCS1/LYN/FYN/LCK
REACTOME_BASE_EXCISION_REPAIR	REACTOME_BASE_EXCISION_REPAIR	REACTOME_BASE_EXCISION_REPAIR	43	-0.466107	-1.486	0.020847	0.110038	0.0876992	4730	tags=63%, list=29%, signal=45%	RPA3/POLE4/PNKP/LIG1/POT1/PCNA/POLB/UNG/POLE3/POLD2/RFC1/APEX1/POLD1/TDG/TINF2/RFC5/RFC4/NEIL3/RFC2/RPA1/RPA2/PARP1/ACD/NEIL2/FEN1/POLE2/PARP2
PID_SHP2_PATHWAY	PID_SHP2_PATHWAY	PID_SHP2_PATHWAY	55	-0.438884	-1.47664	0.0211852	0.111505	0.0888679	1485	tags=42%, list=9%, signal=38%	IL6ST/IFNGR1/EGF/MAP2K1/TEK/ANGPT1/KDR/GNAI1/PDGFB/JAK3/GNAI3/HRAS/PDGFRB/JAK2/IL2RA/IFNG/IL2RB/SDC2/IRS1/LMO4/STAT1/LCK/IL6
REACTOME_INDUCTION_OF_CELL_CELL_FUSION	REACTOME_INDUCTION_OF_CELL_CELL_FUSION	REACTOME_INDUCTION_OF_CELL_CELL_FUSION	13	0.667304	1.53118	0.0212355	0.111505	0.0888679	1061	tags=38%, list=7%, signal=36%	ACE2/ANO9/TMPRSS2/ANO10/ANO7
KEGG_PENTOSE_AND_GLUCURONATE_INTERCONVERSIONS	KEGG_PENTOSE_AND_GLUCURONATE_INTERCONVERSIONS	KEGG_PENTOSE_AND_GLUCURONATE_INTERCONVERSIONS	16	0.655892	1.59658	0.0212372	0.111505	0.0888679	1057	tags=31%, list=7%, signal=29%	UGT2B17/UGT2A3/UGT2B15/CRYL1/UGP2
KEGG_PYRUVATE_METABOLISM	KEGG_PYRUVATE_METABOLISM	KEGG_PYRUVATE_METABOLISM	39	0.502826	1.47429	0.0214288	0.112313	0.0895118	2059	tags=33%, list=13%, signal=29%	PCK1/ACSS2/PKLR/ACSS1/ME3/ALDH1B1/PDHA1/ACACB/ALDH2/LDHD/PCK2/PC/DLD
REACTOME_EGFR_DOWNREGULATION	REACTOME_EGFR_DOWNREGULATION	REACTOME_EGFR_DOWNREGULATION	30	0.544731	1.51202	0.0217299	0.113691	0.0906101	2033	tags=27%, list=13%, signal=23%	EREG/AREG/PTPRK/PTPN3/EGFR/EPN1/SH3KBP1/HBEGF
REACTOME_TELOMERE_MAINTENANCE	REACTOME_TELOMERE_MAINTENANCE	REACTOME_TELOMERE_MAINTENANCE	62	-0.408993	-1.40075	0.0220702	0.115268	0.0918673	4730	tags=52%, list=29%, signal=37%	RPA3/DSCC1/LIG1/POT1/WRN/PIF1/PCNA/CHTF18/CDK2/NOP10/POLD2/RFC1/POLD1/PRIM1/TINF2/RFC5/RUVBL1/PRIM2/RFC4/POLR2E/RFC2/RUVBL2/POLR2A/POLR2I/WRAP53/POLR2G/RPA1/RPA2/ACD/CCNA2/FEN1/POLR2L
REACTOME_SIGNALING_BY_KIT_IN_DISEASE	REACTOME_SIGNALING_BY_KIT_IN_DISEASE	REACTOME_SIGNALING_BY_KIT_IN_DISEASE	20	-0.579674	-1.53143	0.0221704	0.115589	0.0921229	1213	tags=30%, list=8%, signal=28%	HRAS/JAK2/LYN/STAT1/FYN/LCK
WP_PROSTAGLANDIN_AND_LEUKOTRIENE_METABOLISM_IN_SENESCENCE_WP5122	WP_PROSTAGLANDIN_AND_LEUKOTRIENE_METABOLISM_IN_SENESCENCE_WP5122	WP_PROSTAGLANDIN_AND_LEUKOTRIENE_METABOLISM_IN_SENESCENCE_WP5122	29	-0.520184	-1.50681	0.0222207	0.115649	0.0921704	2084	tags=38%, list=13%, signal=33%	ALOX15B/MAPK11/PTGES/PTGIS/HRAS/IGFBP5/PTGER2/ALOX5/ALOX5AP/PLA2G4A/PTGS2
KEGG_MEDICUS_REFERENCE_BILE_ACID_BIOSYNTHESIS	KEGG_MEDICUS_REFERENCE_BILE_ACID_BIOSYNTHESIS	KEGG_MEDICUS_REFERENCE_BILE_ACID_BIOSYNTHESIS	14	0.67493	1.57698	0.0222907	0.11581	0.0922994	754	tags=36%, list=5%, signal=34%	ACOX2/CYP39A1/AMACR/CYP27A1/ACOT8
WP_RELATIONSHIP_BETWEEN_INFLAMMATION_COX_2_AND_EGFR	WP_RELATIONSHIP_BETWEEN_INFLAMMATION_COX_2_AND_EGFR	WP_RELATIONSHIP_BETWEEN_INFLAMMATION_COX_2_AND_EGFR	25	-0.533076	-1.47521	0.0224589	0.116481	0.0928339	2208	tags=36%, list=14%, signal=31%	PIK3CG/AKT1/PIK3CD/AKT3/PLA1A/HRAS/PTGER2/PTGS2/MMP1
REACTOME_ISG15_ANTIVIRAL_MECHANISM	REACTOME_ISG15_ANTIVIRAL_MECHANISM	REACTOME_ISG15_ANTIVIRAL_MECHANISM	68	-0.411854	-1.43827	0.0226152	0.117088	0.0933175	4067	tags=43%, list=25%, signal=32%	NUP93/NUP37/KPNB1/NUP43/KPNA1/NUP133/NUP205/UBB/PIN1/NUP62/NUP160/NUP50/UBA52/UBE2E1/NUP35/NUP155/SEC13/NUP210/EIF4A3/NDC1/KPNA2/MX2/SEH1L/IFIT1/MX1/USP18/STAT1/UBE2L6/ISG15
KEGG_MEDICUS_REFERENCE_MICROTUBULE_RHOA_SIGNALING_PATHWAY	KEGG_MEDICUS_REFERENCE_MICROTUBULE_RHOA_SIGNALING_PATHWAY	KEGG_MEDICUS_REFERENCE_MICROTUBULE_RHOA_SIGNALING_PATHWAY	17	-0.603868	-1.55853	0.0226729	0.117182	0.093393	2082	tags=53%, list=13%, signal=46%	TUBB3/TUBA4A/TUBA1C/TUBB/TUBB2B/TUBA1B/TUBA1A/TUBB2A/TUBB6
WP_SIGNAL_TRANSDUCTION_THROUGH_IL1R	WP_SIGNAL_TRANSDUCTION_THROUGH_IL1R	WP_SIGNAL_TRANSDUCTION_THROUGH_IL1R	32	-0.502072	-1.48756	0.0230035	0.118632	0.094548	3228	tags=44%, list=20%, signal=35%	MAP3K1/NFKBIA/CHUK/IL1A/IRAK3/IL1RAP/TGFB2/TNF/IL1R1/TGFB3/TGFB1/IL1B/IL1RN/IL6
WP_GPCRS_CLASS_A_RHODOPSIN_LIKE	WP_GPCRS_CLASS_A_RHODOPSIN_LIKE	WP_GPCRS_CLASS_A_RHODOPSIN_LIKE	244	-0.307571	-1.28252	0.023033	0.118632	0.094548	2064	tags=14%, list=13%, signal=12%	PTGFR/GPR4/ADRB1/GPR171/GPR161/CCR2/CXCR1/P2RY13/GPR34/APLNR/ACKR4/CMKLR1/F2R/EDNRA/AVPR1A/HTR2B/GPR68/P2RY6/CCR5/PTGER2/SUCNR1/GPR65/FFAR2/CXCR2/NTSR1/PTAFR/FPR2/C3AR1/CCR1/FPR3/FPR1/CXCR4/HCAR3
WP_NICOTINE_EFFECT_ON_DOPAMINERGIC_NEURONS	WP_NICOTINE_EFFECT_ON_DOPAMINERGIC_NEURONS	WP_NICOTINE_EFFECT_ON_DOPAMINERGIC_NEURONS	21	0.600662	1.56387	0.0231693	0.119081	0.094906	249	tags=14%, list=2%, signal=14%	DDC/DRD2/PPP1R1B
REACTOME_LEISHMANIA_INFECTION	REACTOME_LEISHMANIA_INFECTION	REACTOME_LEISHMANIA_INFECTION	160	-0.330674	-1.30167	0.0232002	0.119081	0.094906	1716	tags=23%, list=11%, signal=21%	GNG10/DPEP2/NFKB2/BAIAP2/PSTPIP1/GNAI3/NLRP3/HMOX1/CD247/NCKAP1L/WNT5A/IL18/GNB5/GNG11/P2RX7/WIPF1/ENTPD1/GNAI2/GGT5/MYO5A/RHBDF2/LYN/GNB4/ADCY7/C3/NT5E/PRKAR2B/C3AR1/FGR/HCK/FYN/FCGR2A/WASF1/IL1B/PLK2/CD163/IL6
REACTOME_COPI_INDEPENDENT_GOLGI_TO_ER_RETROGRADE_TRAFFIC	REACTOME_COPI_INDEPENDENT_GOLGI_TO_ER_RETROGRADE_TRAFFIC	REACTOME_COPI_INDEPENDENT_GOLGI_TO_ER_RETROGRADE_TRAFFIC	48	-0.448727	-1.45957	0.0232846	0.119308	0.0950873	3753	tags=44%, list=23%, signal=34%	PAFAH1B2/PAFAH1B1/DYNLL1/ACTR10/DYNC1LI1/ACTR1A/DCTN6/CAPZB/PAFAH1B3/GALNT1/TUBB3/TUBA4A/BICD2/TUBA1C/TUBB2B/TUBA1B/BICD1/TUBA1A/TUBB2A/TUBB6/PLA2G4A
REACTOME_GENE_AND_PROTEIN_EXPRESSION_BY_JAK_STAT_SIGNALING_AFTER_INTERLEUKIN_12_STIMULATION	REACTOME_GENE_AND_PROTEIN_EXPRESSION_BY_JAK_STAT_SIGNALING_AFTER_INTERLEUKIN_12_STIMULATION	REACTOME_GENE_AND_PROTEIN_EXPRESSION_BY_JAK_STAT_SIGNALING_AFTER_INTERLEUKIN_12_STIMULATION	34	-0.504952	-1.51962	0.0234511	0.119749	0.0954388	3008	tags=41%, list=19%, signal=34%	IL10/STAT4/MTAP/CNN2/ANXA2/SOD1/BOLA2/GSTO1/MSN/LCP1/IFNG/SOD2/MIF/SERPINB2
REACTOME_NUCLEAR_PORE_COMPLEX_NPC_DISASSEMBLY	REACTOME_NUCLEAR_PORE_COMPLEX_NPC_DISASSEMBLY	REACTOME_NUCLEAR_PORE_COMPLEX_NPC_DISASSEMBLY	34	-0.502452	-1.51209	0.0234511	0.119749	0.0954388	4067	tags=56%, list=25%, signal=42%	NUP98/NUP54/NUP93/NUP37/NUP43/NEK7/NUP133/NUP205/NUP62/NUP160/CDK1/NUP50/NUP35/NUP155/SEC13/NUP210/NDC1/SEH1L/CCNB1
REACTOME_REGULATION_OF_IFNG_SIGNALING	REACTOME_REGULATION_OF_IFNG_SIGNALING	REACTOME_REGULATION_OF_IFNG_SIGNALING	14	-0.641697	-1.57153	0.0235098	0.119844	0.0955138	944	tags=43%, list=6%, signal=40%	PTPN2/SOCS1/JAK2/IFNG/SOCS3/STAT1
REACTOME_AMINE_LIGAND_BINDING_RECEPTORS	REACTOME_AMINE_LIGAND_BINDING_RECEPTORS	REACTOME_AMINE_LIGAND_BINDING_RECEPTORS	41	0.499667	1.46996	0.0235591	0.11989	0.0955507	1492	tags=15%, list=9%, signal=13%	DRD2/GPR143/ADRA2C/CHRM3/HTR4/ADRA2A
KEGG_MEDICUS_REFERENCE_CXCR4_GNAI_PI3K_BAD_SIGNALING_PATHWAY	KEGG_MEDICUS_REFERENCE_CXCR4_GNAI_PI3K_BAD_SIGNALING_PATHWAY	KEGG_MEDICUS_REFERENCE_CXCR4_GNAI_PI3K_BAD_SIGNALING_PATHWAY	12	-0.673414	-1.58162	0.0236824	0.120312	0.0958868	2658	tags=58%, list=16%, signal=49%	GNAI1/AKT1/PIK3CD/GNAI3/AKT3/GNAI2/CXCR4
PID_CMYB_PATHWAY	PID_CMYB_PATHWAY	PID_CMYB_PATHWAY	82	-0.384928	-1.3926	0.0239293	0.121144	0.0965503	2108	tags=27%, list=13%, signal=23%	CCND1/YEATS4/CEBPD/CD4/MAF/ETS1/MAD1L1/MCM4/HRAS/GATA3/KITLG/TFEC/CDKN2A/SPI1/BIRC3/CCNB1/CSF1R/PIAS3/ADA/COL1A2/LYZ/PTGS2
WP_MITOCHONDRIAL_COMPLEX_IV_ASSEMBLY	WP_MITOCHONDRIAL_COMPLEX_IV_ASSEMBLY	WP_MITOCHONDRIAL_COMPLEX_IV_ASSEMBLY	31	0.543156	1.51886	0.0239738	0.121144	0.0965503	4458	tags=55%, list=28%, signal=40%	COX19/COA3/COX5A/HIGD1A/COX5B/COX20/COX4I1/TMEM177/PNKD/COX10/COX6A1/COX7B/CMC1/COX6C/COX14/PET100/PET117
WP_NEPHROGENESIS	WP_NEPHROGENESIS	WP_NEPHROGENESIS	17	-0.596058	-1.53837	0.0239968	0.121144	0.0965503	1506	tags=29%, list=9%, signal=27%	NOTCH2/OSR1/MEIS1/RSPO3/FOXD1
KEGG_MEDICUS_REFERENCE_DEPHOSPHORYLATION_OF_KINETOCHORE	KEGG_MEDICUS_REFERENCE_DEPHOSPHORYLATION_OF_KINETOCHORE	KEGG_MEDICUS_REFERENCE_DEPHOSPHORYLATION_OF_KINETOCHORE	12	-0.67072	-1.5753	0.0240091	0.121144	0.0965503	2847	tags=75%, list=18%, signal=62%	SKA3/PPP1CA/TTK/SPC25/SKA2/AURKB/NUF2/SKA1/NDC80
KEGG_RIG_I_LIKE_RECEPTOR_SIGNALING_PATHWAY	KEGG_RIG_I_LIKE_RECEPTOR_SIGNALING_PATHWAY	KEGG_RIG_I_LIKE_RECEPTOR_SIGNALING_PATHWAY	66	-0.416661	-1.43953	0.0240992	0.121393	0.0967489	3489	tags=26%, list=22%, signal=20%	MAP3K1/PIN1/NFKBIA/CHUK/FADD/MAPK12/IFNE/TRAF3/DDX3Y/MAPK11/TNF/IFIH1/IRF7/RNF125/ISG15/CXCL10/CXCL8
REACTOME_HEDGEHOG_ON_STATE	REACTOME_HEDGEHOG_ON_STATE	REACTOME_HEDGEHOG_ON_STATE	81	-0.410132	-1.47813	0.0242662	0.121976	0.0972137	3568	tags=51%, list=22%, signal=40%	PSMA5/NUMB/PSMC5/PSMD13/UBB/BOC/RBX1/CDC73/CDON/PSMB4/PSMB2/PSMB10/PSMD1/PSMD12/PSMA4/UBA52/EVC2/PSMD14/SMURF2/PSMA3/PSMA1/PSMD8/PSMB3/PSMD9/DZIP1/PSMC4/GPR161/EVC/GLI3/PSMD2/KIF3A/PSMC1/PSMC3/PSMB8/GLI2/PSMB5/PSME1/PSMC6/PSMB6/PSMB9/GAS1
REACTOME_HCMV_EARLY_EVENTS	REACTOME_HCMV_EARLY_EVENTS	REACTOME_HCMV_EARLY_EVENTS	69	-0.414183	-1.45595	0.024297	0.121976	0.0972137	4067	tags=46%, list=25%, signal=35%	NUP93/TUBB4B/NUP37/NUP43/DYNLL1/NUP133/NUP205/TRIM28/DYNC1LI1/EZH2/NUP62/RBBP4/NUP160/NUP50/NUP35/NUP155/TBL1X/ITGB1/PML/SEC13/NUP210/TUBB3/EED/TUBA4A/TUBA1C/NDC1/TUBB2B/TUBA1B/TUBA1A/SEH1L/TUBB2A/TUBB6
PID_S1P_META_PATHWAY	PID_S1P_META_PATHWAY	PID_S1P_META_PATHWAY	21	-0.571817	-1.5239	0.0244781	0.122679	0.0977738	2658	tags=48%, list=16%, signal=40%	GNAI1/GNAZ/GNA12/S1PR3/S1PR1/GNAI3/GNAI2/SGPP1/GNA15/SPHK1
BIOCARTA_MCM_PATHWAY	BIOCARTA_MCM_PATHWAY	BIOCARTA_MCM_PATHWAY	18	-0.591199	-1.53694	0.0245954	0.123059	0.0980769	2668	tags=67%, list=17%, signal=56%	CDK2/ORC5/MCM7/MCM3/CDT1/MCM6/MCM2/MCM5/MCM4/ORC1/KITLG/CDC6
REACTOME_ENERGY_DEPENDENT_REGULATION_OF_MTOR_BY_LKB1_AMPK	REACTOME_ENERGY_DEPENDENT_REGULATION_OF_MTOR_BY_LKB1_AMPK	REACTOME_ENERGY_DEPENDENT_REGULATION_OF_MTOR_BY_LKB1_AMPK	29	0.549945	1.50742	0.0246679	0.123067	0.098083	4713	tags=48%, list=29%, signal=34%	CAB39L/PRKAB1/STRADB/STK11/TSC2/RRAGB/LAMTOR3/SLC38A9/PRKAA1/TSC1/RRAGA/CAB39/RHEB/LAMTOR4
REACTOME_NCAM_SIGNALING_FOR_NEURITE_OUT_GROWTH	REACTOME_NCAM_SIGNALING_FOR_NEURITE_OUT_GROWTH	REACTOME_NCAM_SIGNALING_FOR_NEURITE_OUT_GROWTH	63	-0.420058	-1.44559	0.0246796	0.123067	0.098083	1405	tags=22%, list=9%, signal=20%	COL4A2/HRAS/NRTN/COL4A1/ST8SIA4/COL5A3/PRNP/COL6A1/COL6A2/COL5A1/COL6A3/COL3A1/COL5A2/FYN
WP_GLUCOCORTICOID_RECEPTOR_PATHWAY	WP_GLUCOCORTICOID_RECEPTOR_PATHWAY	WP_GLUCOCORTICOID_RECEPTOR_PATHWAY	67	-0.425468	-1.47336	0.0250642	0.124776	0.099445	992	tags=30%, list=6%, signal=28%	TNS4/HSP90AA1/STOM/MFGE8/THBD/ANGPTL4/BIRC3/AMIGO2/S100P/PDE4B/IL11/SERPINB9/SNAI2/ALOX5AP/RGS2/PLK2/SRGN/CCL2/PTGS2/ZIC2
WP_GLYCOLYSIS_IN_SENESCENCE	WP_GLYCOLYSIS_IN_SENESCENCE	WP_GLYCOLYSIS_IN_SENESCENCE	11	-0.685398	-1.58378	0.0253157	0.1257	0.100181	2780	tags=64%, list=17%, signal=53%	HK1/PGK1/LDHA/G6PD/GAPDH/PKM/ENO1
REACTOME_DEATH_RECEPTOR_SIGNALING	REACTOME_DEATH_RECEPTOR_SIGNALING	REACTOME_DEATH_RECEPTOR_SIGNALING	150	0.36194	1.34274	0.0253341	0.1257	0.100181	2802	tags=25%, list=17%, signal=21%	VAV3/SMPD3/SPATA2/NGEF/ARHGEF10L/ARHGEF5/MCF2L/ARHGEF9/XIAP/USP2/KALRN/ARHGEF40/ARHGEF19/ABR/SPPL2B/SOS2/SPPL2A/ARHGEF1/ARHGEF18/ARHGEF37/PLEKHG5/TAB3/VAV2/FGD4/PRDM4/ARHGEF11/TRIO/AKAP13/CFLAR/NET1/ARHGEF38/SOS1/TNFSF10/TRAF6/IKBKG/USP4/OTUD7B/RTN4
REACTOME_SENSORY_PROCESSING_OF_SOUND_BY_OUTER_HAIR_CELLS_OF_THE_COCHLEA	REACTOME_SENSORY_PROCESSING_OF_SOUND_BY_OUTER_HAIR_CELLS_OF_THE_COCHLEA	REACTOME_SENSORY_PROCESSING_OF_SOUND_BY_OUTER_HAIR_CELLS_OF_THE_COCHLEA	45	0.486574	1.47448	0.0259132	0.128359	0.1023	2823	tags=33%, list=17%, signal=28%	ESPN/TPRN/PLS1/USH1C/MPP1/EPB41L1/CIB2/CASK/CLIC5/EPS8L2/LHFPL5/EPS8/TRIOBP/SPTAN1/ESPNL
KEGG_MEDICUS_REFERENCE_SPINDLE_ASSEMBLY_CHECKPOINT_SIGNALING	KEGG_MEDICUS_REFERENCE_SPINDLE_ASSEMBLY_CHECKPOINT_SIGNALING	KEGG_MEDICUS_REFERENCE_SPINDLE_ASSEMBLY_CHECKPOINT_SIGNALING	20	-0.573706	-1.51566	0.0262321	0.129722	0.103387	3720	tags=55%, list=23%, signal=42%	ANAPC11/CDC23/ANAPC10/BUB1B/BUB3/MAD2L1/MAD1L1/PTTG1/CDC27/MAD2L2/CDC20
REACTOME_FCGR_ACTIVATION	REACTOME_FCGR_ACTIVATION	REACTOME_FCGR_ACTIVATION	11	-0.67995	-1.57119	0.0266223	0.131353	0.104687	1441	tags=55%, list=9%, signal=50%	CD247/LYN/FGR/HCK/FYN/FCGR2A
REACTOME_NUCLEAR_ENVELOPE_BREAKDOWN	REACTOME_NUCLEAR_ENVELOPE_BREAKDOWN	REACTOME_NUCLEAR_ENVELOPE_BREAKDOWN	51	-0.435293	-1.44768	0.02665	0.131353	0.104687	4067	tags=53%, list=25%, signal=40%	NUP93/LPIN1/NUP37/NUP43/LPIN2/NEK7/NUP133/NUP205/NUP62/TMPO/NUP160/CDK1/NUP50/LMNA/BANF1/NUP35/PRKCB/CTDNEP1/NUP155/SEC13/NUP210/VRK2/NDC1/PLK1/VRK1/SEH1L/CCNB1
REACTOME_KILLING_MECHANISMS	REACTOME_KILLING_MECHANISMS	REACTOME_KILLING_MECHANISMS	12	0.674008	1.52126	0.0268138	0.131941	0.105156	541	tags=25%, list=3%, signal=24%	NOX1/JUN/NOXA1
REACTOME_CD28_DEPENDENT_VAV1_PATHWAY	REACTOME_CD28_DEPENDENT_VAV1_PATHWAY	REACTOME_CD28_DEPENDENT_VAV1_PATHWAY	12	-0.664285	-1.56018	0.0269489	0.132083	0.105269	263	tags=50%, list=2%, signal=49%	VAV1/CD28/CD80/CD86/FYN/LCK
REACTOME_PLATELET_SENSITIZATION_BY_LDL	REACTOME_PLATELET_SENSITIZATION_BY_LDL	REACTOME_PLATELET_SENSITIZATION_BY_LDL	17	-0.5905	-1.52403	0.0269757	0.132083	0.105269	1370	tags=47%, list=8%, signal=43%	PTPN11/PPP2CA/PPP2R5E/PPP2R5C/LRP8/PECAM1/FGR/PLA2G4A
REACTOME_TRANSLESION_SYNTHESIS_BY_POLK	REACTOME_TRANSLESION_SYNTHESIS_BY_POLK	REACTOME_TRANSLESION_SYNTHESIS_BY_POLK	17	-0.591059	-1.52547	0.0269757	0.132083	0.105269	3437	tags=59%, list=21%, signal=46%	PCNA/UBB/RFC1/UBA52/RFC5/RFC4/RFC2/RPA1/RPA2/MAD2L2
REACTOME_RECOGNITION_OF_DNA_DAMAGE_BY_PCNA_CONTAINING_REPLICATION_COMPLEX	REACTOME_RECOGNITION_OF_DNA_DAMAGE_BY_PCNA_CONTAINING_REPLICATION_COMPLEX	REACTOME_RECOGNITION_OF_DNA_DAMAGE_BY_PCNA_CONTAINING_REPLICATION_COMPLEX	30	-0.50794	-1.47482	0.0270603	0.132087	0.105272	3464	tags=50%, list=21%, signal=39%	POLE3/UBB/POLD2/RBX1/RFC1/POLD1/UBA52/USP1/RFC5/RFC4/RFC2/RPA1/RPA2/DTL/POLE2
WP_CHOLESTASIS	WP_CHOLESTASIS	WP_CHOLESTASIS	19	0.610387	1.53271	0.0270653	0.132087	0.105272	2855	tags=47%, list=18%, signal=39%	ATP8B1/ABCC3/NR1H4/TJP2/ABCC2/SCARB1/RXRA/SLC10A1/HMGCR
REACTOME_NS1_MEDIATED_EFFECTS_ON_HOST_PATHWAYS	REACTOME_NS1_MEDIATED_EFFECTS_ON_HOST_PATHWAYS	REACTOME_NS1_MEDIATED_EFFECTS_ON_HOST_PATHWAYS	38	-0.477525	-1.47226	0.0271228	0.132152	0.105323	4900	tags=66%, list=30%, signal=46%	NUP107/NUP85/CPSF4/KPNA4/KPNA5/NUP98/NUP54/NUP93/NUP37/KPNB1/NUP43/KPNA1/NUP133/NUP205/NUP62/NUP160/NUP50/NUP35/NUP155/SEC13/NUP210/NDC1/KPNA2/SEH1L/ISG15
REACTOME_N_GLYCAN_ANTENNAE_ELONGATION	REACTOME_N_GLYCAN_ANTENNAE_ELONGATION	REACTOME_N_GLYCAN_ANTENNAE_ELONGATION	14	0.664203	1.55192	0.0272137	0.132378	0.105503	2777	tags=36%, list=17%, signal=30%	ST6GAL1/MGAT4B/MGAT5/MGAT4A/B4GALT5
REACTOME_SNRNP_ASSEMBLY	REACTOME_SNRNP_ASSEMBLY	REACTOME_SNRNP_ASSEMBLY	50	-0.450363	-1.49508	0.0274159	0.133065	0.106051	4229	tags=50%, list=26%, signal=37%	SNRPE/PHAX/NUP93/NUP37/GEMIN5/NUP43/NUP133/NUP205/SNRPG/NUP62/NUP160/NUP50/DDX20/NUP35/NUP155/SNRPD2/SEC13/NUP210/SNRPF/GEMIN4/NDC1/GEMIN2/SEH1L/SNRPD1/PRMT5
REACTOME_TRANSCRIPTIONAL_REGULATION_OF_WHITE_ADIPOCYTE_DIFFERENTIATION	REACTOME_TRANSCRIPTIONAL_REGULATION_OF_WHITE_ADIPOCYTE_DIFFERENTIATION	REACTOME_TRANSCRIPTIONAL_REGULATION_OF_WHITE_ADIPOCYTE_DIFFERENTIATION	82	0.407248	1.37598	0.0274443	0.133065	0.106051	2349	tags=27%, list=15%, signal=23%	PCK1/PPARG/CEBPA/PPARGC1A/PPARA/MED13/NCOA3/NCOA6/CHD9/KLF5/SREBF2/MED12/KLF4/LPL/MED13L/CREBBP/MED14/CDK19/ZNF638/RXRA/NCOA2/PLIN1
WP_FATTY_ACID_OMEGA_OXIDATION	WP_FATTY_ACID_OMEGA_OXIDATION	WP_FATTY_ACID_OMEGA_OXIDATION	15	0.664742	1.57533	0.0278116	0.134471	0.107172	3398	tags=53%, list=21%, signal=42%	ADH1C/ADH6/ALDH2/CYP2D6/CYP3A4/ADH4/ADH1B/ADH1A
WP_NUCLEAR_RECEPTORS_META_PATHWAY	WP_NUCLEAR_RECEPTORS_META_PATHWAY	WP_NUCLEAR_RECEPTORS_META_PATHWAY	297	0.318976	1.26974	0.0278247	0.134471	0.107172	2176	tags=22%, list=13%, signal=19%	FABP1/SLC26A2/PPP1R14C/SLC39A5/PCK1/NR1I2/CYP2B6/ABCB1/SLC5A1/EPB41L4B/CCL20/SLC39A2/CYP4F12/GPX2/CES3/SLC5A6/GPR153/CES2/JUN/SLC2A8/SCNN1A/CYP3A5/SLC6A6/PPARGC1A/SLC2A12/ACOX1/SULT1A1/PDK4/SOD3/CES4A/PPARA/NR0B2/SLC5A9/VDR/NCOA3/ABCC5/ABCC3/SLC2A9/NCOA6/DBI/NR1H4/NRIP1/EGFR/KLK15/SRC/SLC6A4/PTGR1/SLC6A19/EDN2/EHHADH/DNAJC15/NFE2L2/FGD4/SLC39A4/KTN1/CYP3A4/CDKN1B/HBEGF/ABCC2/AKAP13/GSTA1/PRRG4/GC…
WP_METABOLISM_OF_SPHINGOLIPIDS_IN_ER_AND_GOLGI_APPARATUS	WP_METABOLISM_OF_SPHINGOLIPIDS_IN_ER_AND_GOLGI_APPARATUS	WP_METABOLISM_OF_SPHINGOLIPIDS_IN_ER_AND_GOLGI_APPARATUS	21	-0.567413	-1.51216	0.0279016	0.134624	0.107294	1227	tags=29%, list=8%, signal=26%	KDSR/SGMS2/SGPP1/SGMS1/B3GALNT1/SPHK1
WP_HAIR_FOLLICLE_DEVELOPMENT_CYTODIFFERENTIATION_PART_3_OF_3	WP_HAIR_FOLLICLE_DEVELOPMENT_CYTODIFFERENTIATION_PART_3_OF_3	WP_HAIR_FOLLICLE_DEVELOPMENT_CYTODIFFERENTIATION_PART_3_OF_3	82	-0.378899	-1.37079	0.0279509	0.134644	0.107309	2146	tags=33%, list=13%, signal=29%	FOS/FZD1/TCF4/KRT19/MSX1/GJB6/RUNX3/BMP4/NOTCH2/GLI2/NR3C1/WNT5A/GATA3/KITLG/FST/NFATC1/DKK3/IGFBP5/CD200/PHLDA1/IFNG/EGR2/KLK7/DKK1/S100A4/KLK6/GAS1
BIOCARTA_IL1R_PATHWAY	BIOCARTA_IL1R_PATHWAY	BIOCARTA_IL1R_PATHWAY	30	-0.504678	-1.46535	0.0280945	0.135117	0.107686	3228	tags=47%, list=20%, signal=37%	MAP3K1/NFKBIA/CHUK/IL1A/IRAK3/IL1RAP/TGFB2/TNF/IL1R1/TGFB3/TGFB1/IL1B/IL1RN/IL6
BIOCARTA_PTEN_PATHWAY	BIOCARTA_PTEN_PATHWAY	BIOCARTA_PTEN_PATHWAY	18	0.610585	1.5307	0.0281399	0.135117	0.107687	2556	tags=44%, list=16%, signal=37%	FOXO3/PIK3R1/PDK2/EGFR/PDPK1/CDKN1B/MAPK3/SOS1
REACTOME_RHOA_GTPASE_CYCLE	REACTOME_RHOA_GTPASE_CYCLE	REACTOME_RHOA_GTPASE_CYCLE	140	0.373609	1.37543	0.0282484	0.13542	0.107928	2830	tags=32%, list=18%, signal=27%	VAV3/PLEKHG6/FARP1/ARHGAP44/FAM13A/ROCK2/NGEF/PIK3R1/RHPN2/ARHGEF10L/VAPB/SOWAHC/ARHGEF5/MCF2L/OPHN1/KALRN/ARHGEF40/ARAP1/ARHGEF19/ABR/JUP/ARHGAP18/TMEM87A/ARHGEF1/ARHGEF18/PLEKHG5/STARD13/VAV2/KTN1/TJP2/ARHGEF11/MYO9A/TRIO/ARHGAP26/AKAP13/ARAP3/TEX2/CCDC115/NET1/PLD1/RHPN1/EMC3/IQGAP1/TFRC/PLEKHG4
WP_TGF_BETA_RECEPTOR_SIGNALING	WP_TGF_BETA_RECEPTOR_SIGNALING	WP_TGF_BETA_RECEPTOR_SIGNALING	51	-0.432935	-1.43983	0.0284879	0.136348	0.108668	2331	tags=39%, list=14%, signal=34%	SMAD2/FOS/THBS1/TNF/RUNX2/RUNX3/BMP4/TGFBR1/LIF/HRAS/FST/ZEB2/ENG/IFNG/BAMBI/TGFB1/STAT1/INHBA/SERPINE1/SPP1
BIOCARTA_P38MAPK_PATHWAY	BIOCARTA_P38MAPK_PATHWAY	BIOCARTA_P38MAPK_PATHWAY	36	-0.486684	-1.47983	0.0285709	0.136526	0.108809	3126	tags=42%, list=19%, signal=34%	HMGN1/MAX/MAPKAPK2/HSPB2/MAP3K9/MAP2K4/TGFB2/MAP3K5/TGFBR1/HSPB1/HRAS/TGFB3/TGFB1/STAT1/PLA2G4A
KEGG_HISTIDINE_METABOLISM	KEGG_HISTIDINE_METABOLISM	KEGG_HISTIDINE_METABOLISM	28	0.540351	1.47789	0.0289538	0.138134	0.110091	1065	tags=21%, list=7%, signal=20%	AOC1/DDC/MAOA/ALDH1B1/ALDH2/HNMT
PID_EPHRINB_REV_PATHWAY	PID_EPHRINB_REV_PATHWAY	PID_EPHRINB_REV_PATHWAY	30	-0.50344	-1.46176	0.0291286	0.138745	0.110578	1581	tags=30%, list=10%, signal=27%	PTPN13/TIAM1/LYN/DNM1/FGR/HCK/FYN/LCK/CXCR4
REACTOME_COOPERATION_OF_PREFOLDIN_AND_TRIC_CCT_IN_ACTIN_AND_TUBULIN_FOLDING	REACTOME_COOPERATION_OF_PREFOLDIN_AND_TRIC_CCT_IN_ACTIN_AND_TUBULIN_FOLDING	REACTOME_COOPERATION_OF_PREFOLDIN_AND_TRIC_CCT_IN_ACTIN_AND_TUBULIN_FOLDING	27	-0.527076	-1.50147	0.0292635	0.139081	0.110846	3183	tags=48%, list=20%, signal=39%	CCT7/CCT8/ACTB/CCT2/TUBB3/PFDN2/TUBA4A/TUBA1C/TUBB2B/TUBA1B/TUBA1A/TUBB2A/TUBB6
WP_STING_PATHWAY_IN_KAWASAKI_LIKE_DISEASE_AND_COVID_19	WP_STING_PATHWAY_IN_KAWASAKI_LIKE_DISEASE_AND_COVID_19	WP_STING_PATHWAY_IN_KAWASAKI_LIKE_DISEASE_AND_COVID_19	19	-0.587693	-1.5605	0.0292926	0.139081	0.110846	3228	tags=42%, list=20%, signal=34%	NFKBIA/CHUK/ITPR1/NFKBIE/NLRP3/F3/FCGR2A/IL1B
WP_GPR40_PATHWAY	WP_GPR40_PATHWAY	WP_GPR40_PATHWAY	14	0.661916	1.54657	0.0294098	0.139416	0.111113	1644	tags=36%, list=10%, signal=32%	PLCG1/PLCD1/PLCE1/PLCB1/GNA11
REACTOME_NUCLEOTIDE_SALVAGE	REACTOME_NUCLEOTIDE_SALVAGE	REACTOME_NUCLEOTIDE_SALVAGE	21	-0.563601	-1.502	0.0299557	0.141778	0.112995	1279	tags=57%, list=8%, signal=53%	AMPD2/AMPD3/GMPR/APRT/DCK/HPRT1/PNP/TK1/CDA/ADA/UPP1/TYMP
KEGG_MEDICUS_REFERENCE_LONG_PATCH_BER	KEGG_MEDICUS_REFERENCE_LONG_PATCH_BER	KEGG_MEDICUS_REFERENCE_LONG_PATCH_BER	17	-0.583085	-1.50489	0.0302855	0.142884	0.113877	4648	tags=76%, list=29%, signal=55%	POLE4/LIG1/PCNA/POLB/POLE3/POLD2/RFC1/POLD1/RFC5/RFC4/RFC2/FEN1/POLE2
WP_GENES_ASSOCIATED_WITH_THE_DEVELOPMENT_OF_RHEUMATOID_ARTHRITIS	WP_GENES_ASSOCIATED_WITH_THE_DEVELOPMENT_OF_RHEUMATOID_ARTHRITIS	WP_GENES_ASSOCIATED_WITH_THE_DEVELOPMENT_OF_RHEUMATOID_ARTHRITIS	17	-0.581349	-1.50041	0.0302855	0.142884	0.113877	3573	tags=82%, list=22%, signal=64%	CCR6/CIITA/TRAF1/PADI4/CD244/FCRL3/IL6ST/PHF19/STAT4/ITGAV/PTPN22/CTLA4/CD40/IL2RA
KEGG_MEDICUS_REFERENCE_CXCR_GNB_G_PI3K_AKT_SIGNALING_PATHWAY	KEGG_MEDICUS_REFERENCE_CXCR_GNB_G_PI3K_AKT_SIGNALING_PATHWAY	KEGG_MEDICUS_REFERENCE_CXCR_GNB_G_PI3K_AKT_SIGNALING_PATHWAY	26	-0.518399	-1.46664	0.0306404	0.14402	0.114782	2366	tags=46%, list=15%, signal=39%	GNB1/GNG2/PIK3CG/AKT1/GNG10/AKT3/PIK3R5/GNB5/GNG11/GNB4/CXCR2/CXCL8
REACTOME_NFE2L2_REGULATING_TUMORIGENIC_GENES	REACTOME_NFE2L2_REGULATING_TUMORIGENIC_GENES	REACTOME_NFE2L2_REGULATING_TUMORIGENIC_GENES	11	0.708906	1.56919	0.0306775	0.14402	0.114782	3641	tags=82%, list=23%, signal=63%	AREG/NOTCH1/BCL2/NFE2L2/CREBBP/PDGFA/SP1/MAFK/BCL2L1
WP_HEMATOPOIETIC_STEM_CELL_DIFFERENTIATION	WP_HEMATOPOIETIC_STEM_CELL_DIFFERENTIATION	WP_HEMATOPOIETIC_STEM_CELL_DIFFERENTIATION	53	-0.420963	-1.40623	0.030703	0.14402	0.114782	3664	tags=47%, list=23%, signal=37%	LYL1/PIM1/CD34/ITGB3/CSF3/VAV1/LEF1/IL1A/LMO2/TRAF3IP3/SEC14L2/IKZF1/FOS/CBFA2T3/RHOH/FLI1/NCKAP1L/KITLG/CSF2/TRIM29/SPI1/MUC1/IL1B/CXCR4/IL6
REACTOME_ROS_AND_RNS_PRODUCTION_IN_PHAGOCYTES	REACTOME_ROS_AND_RNS_PRODUCTION_IN_PHAGOCYTES	REACTOME_ROS_AND_RNS_PRODUCTION_IN_PHAGOCYTES	35	-0.485069	-1.45766	0.0307198	0.14402	0.114782	4315	tags=49%, list=27%, signal=36%	NOS3/ATP6V1C1/ATP6V0D2/NCF4/ATP6V0E2/ATP6V0A4/ATP6V1D/TCIRG1/NOS2/HVCN1/ATP6V0B/ATP6V1B2/RAC2/NCF1/SLC11A1/CYBB/NCF2
REACTOME_TOLL_LIKE_RECEPTOR_9_TLR9_CASCADE	REACTOME_TOLL_LIKE_RECEPTOR_9_TLR9_CASCADE	REACTOME_TOLL_LIKE_RECEPTOR_9_TLR9_CASCADE	101	-0.366566	-1.38299	0.0309734	0.144807	0.115409	2169	tags=28%, list=13%, signal=24%	NFKBIA/CHUK/MAP2K1/TLR7/MAPKAPK2/UBA52/PELI3/RPS6KA2/MAP2K4/FOS/NKIRAS1/MAPK11/S100B/NFKB2/RIPK2/USP14/TIFA/NLRC5/MAP3K8/DUSP7/IRF7/DUSP6/S100A12/USP18/IKBIP/CD14/LY96/DUSP4
REACTOME_EXTENSION_OF_TELOMERES	REACTOME_EXTENSION_OF_TELOMERES	REACTOME_EXTENSION_OF_TELOMERES	48	-0.441056	-1.43462	0.0309849	0.144807	0.115409	4730	tags=56%, list=29%, signal=40%	RPA3/DSCC1/LIG1/POT1/WRN/PIF1/PCNA/CHTF18/CDK2/NOP10/POLD2/RFC1/POLD1/PRIM1/TINF2/RFC5/RUVBL1/PRIM2/RFC4/RFC2/RUVBL2/WRAP53/RPA1/RPA2/ACD/CCNA2/FEN1
KEGG_MEDICUS_VARIANT_MLL_ENL_FUSION_TO_TRANSCRIPTIONAL_ACTIVATION	KEGG_MEDICUS_VARIANT_MLL_ENL_FUSION_TO_TRANSCRIPTIONAL_ACTIVATION	KEGG_MEDICUS_VARIANT_MLL_ENL_FUSION_TO_TRANSCRIPTIONAL_ACTIVATION	12	-0.651102	-1.52922	0.031522	0.147086	0.117226	2813	tags=50%, list=17%, signal=41%	SIX1/CDKN2C/MEIS1/HPGD/SIX4/FUT8
WP_NON_GENOMIC_ACTIONS_OF_1_25_DIHYDROXYVITAMIN_D3	WP_NON_GENOMIC_ACTIONS_OF_1_25_DIHYDROXYVITAMIN_D3	WP_NON_GENOMIC_ACTIONS_OF_1_25_DIHYDROXYVITAMIN_D3	73	-0.400728	-1.42657	0.0318108	0.148202	0.118115	2359	tags=32%, list=15%, signal=27%	PRKCH/RELB/PLCG2/MAPK11/TNF/CYP27B1/STAT2/NFKB2/ETS1/HRAS/CD40/IFNG/RSAD2/TLR8/CAV1/TLR2/STAT1/IFI44L/ISG15/OAS2/CCL2/IL6/CXCL8
PID_PS1_PATHWAY	PID_PS1_PATHWAY	PID_PS1_PATHWAY	44	0.478962	1.4459	0.0318839	0.14831	0.118201	3344	tags=36%, list=21%, signal=29%	NKD1/WIF1/JUN/NOTCH1/AXIN1/NEDD4/HNF1A/LRP6/CREBBP/FRAT1/TLE1/MAPK3/CSNK2A1/MYC/NLK/GSK3B
REACTOME_NUCLEAR_EVENTS_MEDIATED_BY_NFE2L2	REACTOME_NUCLEAR_EVENTS_MEDIATED_BY_NFE2L2	REACTOME_NUCLEAR_EVENTS_MEDIATED_BY_NFE2L2	93	-0.373982	-1.38573	0.0322566	0.14981	0.119396	3442	tags=40%, list=21%, signal=31%	PSMC5/PSMD13/UBB/EGF/RBX1/PSMB4/SRXN1/PSMB2/PSMB10/PSMD1/PSMD12/PSMA4/UBA52/PGD/PSMD14/PSMA3/PSMA1/PSMD8/PSMB3/PSMD9/G6PD/PSMC4/PRDX1/PSMD2/PSMC1/PSMC3/PSMB8/HMOX1/PSMB5/PSME1/PSMC6/CDKN2A/PSMB6/PSMB9/SLC7A11/ME1/CCL2
REACTOME_G1_S_SPECIFIC_TRANSCRIPTION	REACTOME_G1_S_SPECIFIC_TRANSCRIPTION	REACTOME_G1_S_SPECIFIC_TRANSCRIPTION	29	-0.508391	-1.47265	0.0323979	0.150018	0.119563	3227	tags=52%, list=20%, signal=41%	LIN9/RBBP4/CDK1/E2F6/LIN52/DHFR/CDT1/FBXO5/RRM2/TFDP1/CDC45/ORC1/TK1/CDC6/TYMS
WP_CHOLESTEROL_METABOLISM_WITH_BLOCH_AND_KANDUTSCH_RUSSELL_PATHWAYS	WP_CHOLESTEROL_METABOLISM_WITH_BLOCH_AND_KANDUTSCH_RUSSELL_PATHWAYS	WP_CHOLESTEROL_METABOLISM_WITH_BLOCH_AND_KANDUTSCH_RUSSELL_PATHWAYS	44	0.478703	1.44512	0.0324023	0.150018	0.119563	3563	tags=39%, list=22%, signal=30%	HMGCS2/ABCG1/CYP27A1/MYLIP/SREBF2/MSMO1/EBP/HSD17B7/HMGCR/IDI1/ACSL3/FDFT1/SCD/CH25H/MVD/MVK/TM7SF2
PID_INTEGRIN5_PATHWAY	PID_INTEGRIN5_PATHWAY	PID_INTEGRIN5_PATHWAY	14	-0.626244	-1.53369	0.0327163	0.151237	0.120534	2072	tags=64%, list=13%, signal=56%	ITGB7/ITGA4/TGFBR1/ITGAV/FN1/VCAM1/PLAUR/FBN1/PLAU
REACTOME_ABC_TRANSPORTER_DISORDERS	REACTOME_ABC_TRANSPORTER_DISORDERS	REACTOME_ABC_TRANSPORTER_DISORDERS	73	-0.399684	-1.42286	0.0337388	0.155721	0.124108	3568	tags=42%, list=22%, signal=33%	PSMA5/PSMC5/PSMD13/UBB/PSMB4/PSMB2/PSMB10/PSMD1/PSMD12/PSMA4/UBA52/ABCC9/ABCG5/PSMD14/PSMA3/PSMA1/PSMD8/PSMB3/PSMD9/PSMC4/PSMD2/PSMC1/PSMC3/PSMB8/ABCA12/PSMB5/PSME1/PSMC6/PSMB6/ABCA3/PSMB9
REACTOME_HEDGEHOG_OFF_STATE	REACTOME_HEDGEHOG_OFF_STATE	REACTOME_HEDGEHOG_OFF_STATE	106	-0.354822	-1.34084	0.033877	0.156118	0.124424	3638	tags=42%, list=23%, signal=33%	INTU/PSMA5/NUMB/PSMC5/PSMD13/UBB/RBX1/PSMB4/PSMB2/WDR19/PSMB10/PSMD1/PSMD12/PSMA4/UBA52/PSMD14/PSMA3/PSMA1/PSMD8/TUBB3/PSMB3/TUBA4A/PSMD9/PSMC4/GPR161/GLI3/PSMD2/KIF3A/PSMC1/TUBA1C/PSMC3/PSMB8/GLI2/PSMB5/TUBB2B/PSME1/TUBA1B/PSMC6/TUBA1A/PSMB6/TUBB2A/ADCY7/PSMB9/PRKAR2B/TUBB6
REACTOME_TNFS_BIND_THEIR_PHYSIOLOGICAL_RECEPTORS	REACTOME_TNFS_BIND_THEIR_PHYSIOLOGICAL_RECEPTORS	REACTOME_TNFS_BIND_THEIR_PHYSIOLOGICAL_RECEPTORS	28	-0.499701	-1.44067	0.034142	0.15694	0.125079	2571	tags=39%, list=16%, signal=33%	TNFSF8/FASLG/TNFRSF1B/TNFRSF4/CD70/TNFRSF9/TNFRSF11B/TNFRSF18/TNFSF4/TNFSF13B/TNFSF9
KEGG_NUCLEOTIDE_EXCISION_REPAIR	KEGG_NUCLEOTIDE_EXCISION_REPAIR	KEGG_NUCLEOTIDE_EXCISION_REPAIR	43	-0.443546	-1.41407	0.0341609	0.15694	0.125079	4894	tags=60%, list=30%, signal=42%	GTF2H1/ERCC2/RPA3/POLE4/ERCC4/XPA/LIG1/GTF2H5/PCNA/GTF2H4/ERCC1/ERCC8/CETN2/POLE3/POLD2/RBX1/RFC1/POLD1/RFC5/RFC4/RFC2/RPA1/DDB2/RPA2/POLE2/MNAT1
WP_ECTODERM_DIFFERENTIATION	WP_ECTODERM_DIFFERENTIATION	WP_ECTODERM_DIFFERENTIATION	130	-0.335356	-1.29447	0.0345405	0.158439	0.126274	990	tags=15%, list=6%, signal=14%	KIFC3/GRAMD1B/NFATC1/TNFRSF11B/CAP2/ST8SIA4/GAS2L1/ROR2/RAB8B/TFAP2C/ARHGAP10/STC1/PODXL/MAFB/FYN/TFAP2A/CCL2/LY6E/KRT6A
WP_MITOCHONDRIAL_GENE_EXPRESSION	WP_MITOCHONDRIAL_GENE_EXPRESSION	WP_MITOCHONDRIAL_GENE_EXPRESSION	19	0.598443	1.50271	0.0352631	0.161161	0.128444	1241	tags=26%, list=8%, signal=24%	MYEF2/PPARGC1A/MTERF1/ESRRA/PPARGC1B
REACTOME_METABOLISM_OF_FOLATE_AND_PTERINES	REACTOME_METABOLISM_OF_FOLATE_AND_PTERINES	REACTOME_METABOLISM_OF_FOLATE_AND_PTERINES	15	-0.604614	-1.5113	0.0352789	0.161161	0.128444	1980	tags=53%, list=12%, signal=47%	MTHFD1L/FOLR2/FPGS/DHFR/MTHFD1/ALDH1L2/SHMT2/MTHFD2
KEGG_GLYCOSAMINOGLYCAN_BIOSYNTHESIS_KERATAN_SULFATE	KEGG_GLYCOSAMINOGLYCAN_BIOSYNTHESIS_KERATAN_SULFATE	KEGG_GLYCOSAMINOGLYCAN_BIOSYNTHESIS_KERATAN_SULFATE	14	-0.619462	-1.51708	0.0353564	0.161161	0.128444	2031	tags=43%, list=13%, signal=38%	CHST4/ST3GAL1/CHST2/CHST1/CHST6/FUT8
KEGG_PATHOGENIC_ESCHERICHIA_COLI_INFECTION	KEGG_PATHOGENIC_ESCHERICHIA_COLI_INFECTION	KEGG_PATHOGENIC_ESCHERICHIA_COLI_INFECTION	50	-0.436262	-1.44827	0.0354046	0.161161	0.128444	2498	tags=38%, list=15%, signal=32%	CTTN/ITGB1/TLR5/ACTB/KRT18/EZR/TUBB3/TUBA4A/TUBA1C/TUBB/TUBB2B/TUBA1B/TUBA1A/TUBB2A/HCLS1/FYN/TUBB6/CD14/LY96
WP_PATHOGENIC_ESCHERICHIA_COLI_INFECTION	WP_PATHOGENIC_ESCHERICHIA_COLI_INFECTION	WP_PATHOGENIC_ESCHERICHIA_COLI_INFECTION	50	-0.436262	-1.44827	0.0354046	0.161161	0.128444	2498	tags=38%, list=15%, signal=32%	CTTN/ITGB1/TLR5/ACTB/KRT18/EZR/TUBB3/TUBA4A/TUBA1C/TUBB/TUBB2B/TUBA1B/TUBA1A/TUBB2A/HCLS1/FYN/TUBB6/CD14/LY96
REACTOME_GOLGI_TO_ER_RETROGRADE_TRANSPORT	REACTOME_GOLGI_TO_ER_RETROGRADE_TRANSPORT	REACTOME_GOLGI_TO_ER_RETROGRADE_TRANSPORT	127	-0.335718	-1.28922	0.0356693	0.162118	0.129206	3311	tags=33%, list=20%, signal=27%	SURF4/ARCN1/DYNC1LI1/ACTR1A/DCTN6/RACGAP1/CENPE/KDELR1/CAPZB/BNIP1/COPG1/PAFAH1B3/KIF4A/KIF1B/GALNT1/KIF18B/TMED2/TMED10/TUBB3/TUBA4A/BICD2/KIF11/KIF3A/TUBA1C/ARF4/COPZ2/KIF18A/TUBB2B/KLC1/KIF26B/TUBA1B/NAPG/KIF2C/BICD1/ARFGAP3/TUBA1A/KIF20A/KLC2/TUBB2A/KDELR3/TUBB6/PLA2G4A
REACTOME_CRMPS_IN_SEMA3A_SIGNALING	REACTOME_CRMPS_IN_SEMA3A_SIGNALING	REACTOME_CRMPS_IN_SEMA3A_SIGNALING	16	-0.589775	-1.4982	0.0358289	0.162595	0.129587	811	tags=25%, list=5%, signal=24%	DPYSL3/DPYSL2/NRP1/FYN
BIOCARTA_CK1_PATHWAY	BIOCARTA_CK1_PATHWAY	BIOCARTA_CK1_PATHWAY	16	0.626537	1.52512	0.0361593	0.163553	0.13035	1006	tags=31%, list=6%, signal=29%	DRD2/PRKACB/PPP1R1B/PRKAR2A/PLCB1
WP_NEUROTRANSMITTER_DISORDERS	WP_NEUROTRANSMITTER_DISORDERS	WP_NEUROTRANSMITTER_DISORDERS	10	0.709884	1.52085	0.0361842	0.163553	0.13035	441	tags=20%, list=3%, signal=19%	DDC/MAOA
REACTOME_CYP2E1_REACTIONS	REACTOME_CYP2E1_REACTIONS	REACTOME_CYP2E1_REACTIONS	11	0.696714	1.54221	0.0362048	0.163553	0.13035	1251	tags=27%, list=8%, signal=25%	CYP2B6/CYP2S1/CYP2D6
KEGG_PRIMARY_BILE_ACID_BIOSYNTHESIS	KEGG_PRIMARY_BILE_ACID_BIOSYNTHESIS	KEGG_PRIMARY_BILE_ACID_BIOSYNTHESIS	16	0.624619	1.52045	0.0367031	0.165492	0.131895	412	tags=25%, list=3%, signal=24%	ACOX2/CYP39A1/AMACR/CYP27A1
REACTOME_PI3K_EVENTS_IN_ERBB4_SIGNALING	REACTOME_PI3K_EVENTS_IN_ERBB4_SIGNALING	REACTOME_PI3K_EVENTS_IN_ERBB4_SIGNALING	10	0.706894	1.51444	0.0367452	0.165492	0.131895	2033	tags=30%, list=13%, signal=26%	EREG/PIK3R1/HBEGF
PID_S1P_S1P1_PATHWAY	PID_S1P_S1P1_PATHWAY	PID_S1P_S1P1_PATHWAY	21	-0.5511	-1.46869	0.0375008	0.16864	0.134404	2798	tags=52%, list=17%, signal=43%	KDR/GNAI1/PDGFB/GNAZ/S1PR1/ITGAV/GNAI3/PDGFRB/GNAI2/SPHK1/PTGS2
KEGG_MEDICUS_REFERENCE_TAC3_TACR3_PLC_PKC_SIGNALING_PATHWAY	KEGG_MEDICUS_REFERENCE_TAC3_TACR3_PLC_PKC_SIGNALING_PATHWAY	KEGG_MEDICUS_REFERENCE_TAC3_TACR3_PLC_PKC_SIGNALING_PATHWAY	10	0.7063	1.51317	0.0378671	0.170031	0.135513	2590	tags=40%, list=16%, signal=34%	PLCB4/PLCB1/PRKCA/TAC3
WP_COVID_19_ADVERSE_OUTCOME_PATHWAY	WP_COVID_19_ADVERSE_OUTCOME_PATHWAY	WP_COVID_19_ADVERSE_OUTCOME_PATHWAY	14	-0.615516	-1.50741	0.0379998	0.17037	0.135782	771	tags=43%, list=5%, signal=41%	IL2RA/IL1B/CCL2/IL6/CXCL10/CXCL8
REACTOME_GASTRULATION	REACTOME_GASTRULATION	REACTOME_GASTRULATION	107	-0.348063	-1.31271	0.0380926	0.170529	0.135909	3568	tags=42%, list=22%, signal=33%	PSMA5/PAX6/SOX2/PSMC5/PSMD13/NOG/LEF1/PSMB4/PSMB2/PSMB10/PSMD1/PSMD12/PSMA4/PSMD14/PSMA3/PSMA1/SMAD2/PSMD8/PSMB3/SNW1/PSMD9/PSMC4/SNAI1/FGFR1/PSMD2/SOX17/PSMC1/PSMC3/PSMB8/BMP4/PSMB5/FGF2/TEAD4/OSR1/PSME1/EOMES/PSMC6/ZEB2/ZNF521/PSMB6/MAMLD1/PSMB9/FOXC1/CXCR4/ZIC2
WP_GLUCURONIDATION	WP_GLUCURONIDATION	WP_GLUCURONIDATION	14	0.646478	1.5105	0.0382051	0.170775	0.136106	1057	tags=29%, list=7%, signal=27%	UGT2B17/UGT2A3/UGT2B15/UGP2
BIOCARTA_NPP1_PATHWAY	BIOCARTA_NPP1_PATHWAY	BIOCARTA_NPP1_PATHWAY	10	-0.674181	-1.52022	0.0383933	0.17136	0.136572	1405	tags=50%, list=9%, signal=46%	ALPL/COL4A2/COL4A1/IBSP/SPP1
KEGG_MEDICUS_REFERENCE_DISASSEMBLY_OF_MCC	KEGG_MEDICUS_REFERENCE_DISASSEMBLY_OF_MCC	KEGG_MEDICUS_REFERENCE_DISASSEMBLY_OF_MCC	16	-0.586602	-1.49014	0.0385076	0.171613	0.136773	3720	tags=56%, list=23%, signal=43%	ANAPC11/CDC23/ANAPC10/BUB1B/BUB3/MAD2L1/CDC27/TRIP13/CDC20
KEGG_HYPERTROPHIC_CARDIOMYOPATHY_HCM	KEGG_HYPERTROPHIC_CARDIOMYOPATHY_HCM	KEGG_HYPERTROPHIC_CARDIOMYOPATHY_HCM	81	-0.395629	-1.42586	0.0387053	0.172236	0.13727	2645	tags=33%, list=16%, signal=28%	CACNA2D3/TPM4/LMNA/ITGB7/SGCD/ITGB1/ACTB/TPM2/ITGA1/ITGA7/ITGA4/TGFB2/TNF/SGCB/ITGA11/CACNA2D1/ITGAV/ITGA3/TNNI3/LAMA2/ACTC1/DES/TGFB3/TGFB1/TNNC1/ITGA5/IL6
PID_IL4_2PATHWAY	PID_IL4_2PATHWAY	PID_IL4_2PATHWAY	61	-0.405392	-1.38642	0.0388366	0.172562	0.13753	2373	tags=31%, list=15%, signal=27%	RPS6KB1/JAK3/PARP14/AKT1/ETS1/IL13RA2/HMGA1/DOK2/SOCS1/JAK2/SPI1/BCL6/IRS1/SOCS3/EGR2/THY1/CCL26/COL1A2/COL1A1
REACTOME_PROTEIN_LOCALIZATION	REACTOME_PROTEIN_LOCALIZATION	REACTOME_PROTEIN_LOCALIZATION	152	0.358632	1.3323	0.039185	0.173302	0.13812	4211	tags=33%, list=26%, signal=25%	PHYH/ACOX2/EPHX2/AMACR/PXMP4/ACOX1/PIPOX/DDO/ACOT8/ZFAND6/CAT/NUDT7/SLC27A2/USP9X/DECR2/LDHD/PXMP2/COX19/OTC/CROT/PECR/ACO2/EHHADH/GET4/SLC25A13/MLYCD/HSD17B4/NUDT19/APP/PEX26/TIMM10B/AGXT/TYSND1/SCP2/ACAA1/GFER/BAG6/ABCD3/PEX16/GSTK1/PEX1/CHCHD10/DNAJC19/HMGCL/PMPCB/ECH1/TIMM17B/TIMM8A/CHCHD7/ACOX3
KEGG_MEDICUS_PATHOGEN_KSHV_VGPCR_TO_GNB_G_PI3K_JNK_SIGNALING_PATHWAY	KEGG_MEDICUS_PATHOGEN_KSHV_VGPCR_TO_GNB_G_PI3K_JNK_SIGNALING_PATHWAY	KEGG_MEDICUS_PATHOGEN_KSHV_VGPCR_TO_GNB_G_PI3K_JNK_SIGNALING_PATHWAY	29	-0.494281	-1.43178	0.0392062	0.173302	0.13812	2366	tags=31%, list=15%, signal=27%	GNG2/PIK3CG/GNG10/PIK3R5/GNB5/GNG11/GNB4/IL6/CXCL8
KEGG_MEDICUS_REFERENCE_ITGA_B_FAK_RAC_SIGNALING_PATHWAY	KEGG_MEDICUS_REFERENCE_ITGA_B_FAK_RAC_SIGNALING_PATHWAY	KEGG_MEDICUS_REFERENCE_ITGA_B_FAK_RAC_SIGNALING_PATHWAY	29	-0.494058	-1.43114	0.0392062	0.173302	0.13812	3582	tags=52%, list=22%, signal=40%	ITGB5/CRK/ITGB3/ITGB7/ITGB1/ITGA1/ITGA7/ITGA4/ITGA11/ITGAV/ITGA3/RAC2/RAC3/FN1/ITGA5
REACTOME_CARBOXYTERMINAL_POST_TRANSLATIONAL_MODIFICATIONS_OF_TUBULIN	REACTOME_CARBOXYTERMINAL_POST_TRANSLATIONAL_MODIFICATIONS_OF_TUBULIN	REACTOME_CARBOXYTERMINAL_POST_TRANSLATIONAL_MODIFICATIONS_OF_TUBULIN	38	-0.464001	-1.43057	0.0392361	0.173302	0.13812	2082	tags=29%, list=13%, signal=25%	TUBB3/TUBA4A/VASH1/TTL/TUBA1C/TPGS2/TUBB2B/TUBA1B/TUBA1A/TUBB2A/TUBB6
KEGG_MEDICUS_VARIANT_MUTATION_CAUSED_ABERRANT_ABETA_TO_MGLUR5_CA2_APOPTOTIC_PATHWAY	KEGG_MEDICUS_VARIANT_MUTATION_CAUSED_ABERRANT_ABETA_TO_MGLUR5_CA2_APOPTOTIC_PATHWAY	KEGG_MEDICUS_VARIANT_MUTATION_CAUSED_ABERRANT_ABETA_TO_MGLUR5_CA2_APOPTOTIC_PATHWAY	22	0.573868	1.505	0.0395788	0.173968	0.138651	1130	tags=18%, list=7%, signal=17%	PLCB4/ITPR2/PLCB1/CYCS
PID_SYNDECAN_3_PATHWAY	PID_SYNDECAN_3_PATHWAY	PID_SYNDECAN_3_PATHWAY	17	-0.565789	-1.46025	0.0395825	0.173968	0.138651	183	tags=18%, list=1%, signal=17%	CTTN/FYN/CXCL8
WP_LEPTIN_INSULIN_SIGNALING_OVERLAP	WP_LEPTIN_INSULIN_SIGNALING_OVERLAP	WP_LEPTIN_INSULIN_SIGNALING_OVERLAP	17	-0.56503	-1.45829	0.0395825	0.173968	0.138651	2396	tags=41%, list=15%, signal=35%	PIK3R3/PIK3CG/AKT1/SOCS1/JAK2/IRS1/SOCS3
REACTOME_CALCITONIN_LIKE_LIGAND_RECEPTORS	REACTOME_CALCITONIN_LIKE_LIGAND_RECEPTORS	REACTOME_CALCITONIN_LIKE_LIGAND_RECEPTORS	10	-0.671811	-1.51487	0.0396838	0.173968	0.138651	1123	tags=40%, list=7%, signal=37%	RAMP3/CALCRL/ADM/RAMP1
REACTOME_FORMATION_OF_THE_ANTERIOR_NEURAL_PLATE	REACTOME_FORMATION_OF_THE_ANTERIOR_NEURAL_PLATE	REACTOME_FORMATION_OF_THE_ANTERIOR_NEURAL_PLATE	10	-0.672079	-1.51548	0.0396838	0.173968	0.138651	948	tags=50%, list=6%, signal=47%	PAX6/SOX2/ZEB2/ZNF521/ZIC2
KEGG_GNRH_SIGNALING_PATHWAY	KEGG_GNRH_SIGNALING_PATHWAY	KEGG_GNRH_SIGNALING_PATHWAY	92	0.398426	1.37642	0.039755	0.173968	0.138651	2556	tags=27%, list=16%, signal=23%	PLCB4/PLA2G12B/PRKACB/JUN/MAP2K6/CACNA1D/ITPR2/MAPK13/ADCY6/PLCB1/EGFR/SRC/SOS2/GNA11/PTK2B/PLA2G12A/PRKCD/PLA2G6/HBEGF/PRKCA/MAP3K2/ADCY3/PLD1/MAPK3/SOS1
KEGG_SMALL_CELL_LUNG_CANCER	KEGG_SMALL_CELL_LUNG_CANCER	KEGG_SMALL_CELL_LUNG_CANCER	84	-0.383457	-1.38993	0.0398278	0.173968	0.138651	2500	tags=38%, list=15%, signal=32%	NFKBIA/CHUK/MAX/CCNE2/RARB/TRAF3/ITGB1/LAMA4/PIK3R3/NOS2/SKP2/PIK3CG/LAMC1/CCND1/PIAS2/AKT1/PIK3CD/LAMC2/CKS1B/ITGAV/COL4A2/AKT3/PIK3R5/ITGA3/LAMA5/LAMA2/COL4A1/BIRC3/FN1/LAMB2/PIAS3/PTGS2
WP_ADIPOGENESIS	WP_ADIPOGENESIS	WP_ADIPOGENESIS	128	-0.333088	-1.28218	0.0398544	0.173968	0.138651	2122	tags=26%, list=13%, signal=23%	FZD1/GADD45B/CEBPD/TNF/STAT2/RETN/PNPLA3/BMP4/CYP26B1/NR3C1/NR2F1/PTGIS/LIF/GATA3/HMGA1/AHR/SOCS1/FAS/WWTR1/MIF/HIF1A/IRS1/SOCS3/EGR2/TGFB1/CFD/STAT1/OSM/SFRP4/SERPINE1/TWIST1/SPOCK1/IL6
REACTOME_EARLY_PHASE_OF_HIV_LIFE_CYCLE	REACTOME_EARLY_PHASE_OF_HIV_LIFE_CYCLE	REACTOME_EARLY_PHASE_OF_HIV_LIFE_CYCLE	14	-0.61305	-1.50138	0.0399824	0.174272	0.138892	2838	tags=71%, list=18%, signal=59%	LIG1/XRCC4/KPNA1/BANF1/PSIP1/CD4/FEN1/HMGA1/CCR5/CXCR4
PID_NFAT_TFPATHWAY	PID_NFAT_TFPATHWAY	PID_NFAT_TFPATHWAY	45	-0.438609	-1.40996	0.0401167	0.174601	0.139155	2671	tags=40%, list=17%, signal=33%	DGKA/IKZF1/FASLG/FOS/TNF/MAF/EGR3/CTLA4/GATA3/CSF2/NFATC1/BATF3/IL2RA/IFNG/EGR2/FOSL1/PTGS2/CXCL8
WP_TRIACYLGLYCERIDE_SYNTHESIS	WP_TRIACYLGLYCERIDE_SYNTHESIS	WP_TRIACYLGLYCERIDE_SYNTHESIS	21	0.583563	1.51935	0.0401811	0.174626	0.139175	2503	tags=38%, list=15%, signal=32%	MOGAT3/MOGAT2/LPL/DGAT1/DGAT2/GK/AGPAT2/PNPLA2
KEGG_MEDICUS_REFERENCE_ITGA_B_RHOG_RAC_SIGNALING_PATHWAY	KEGG_MEDICUS_REFERENCE_ITGA_B_RHOG_RAC_SIGNALING_PATHWAY	KEGG_MEDICUS_REFERENCE_ITGA_B_RHOG_RAC_SIGNALING_PATHWAY	27	-0.511982	-1.45847	0.040719	0.176706	0.140833	3582	tags=56%, list=22%, signal=43%	ITGB5/ITGB3/RHOG/ITGB7/ITGB1/ITGA1/ITGA7/ITGA4/ITGA11/ITGAV/ITGA3/RAC2/RAC3/FN1/ITGA5
KEGG_OLFACTORY_TRANSDUCTION	KEGG_OLFACTORY_TRANSDUCTION	KEGG_OLFACTORY_TRANSDUCTION	108	0.384038	1.36407	0.0415335	0.17987	0.143354	158	tags=3%, list=1%, signal=3%	CLCA1/CLCA4/PRKACB
REACTOME_ANTI_INFLAMMATORY_RESPONSE_FAVOURING_LEISHMANIA_PARASITE_INFECTION	REACTOME_ANTI_INFLAMMATORY_RESPONSE_FAVOURING_LEISHMANIA_PARASITE_INFECTION	REACTOME_ANTI_INFLAMMATORY_RESPONSE_FAVOURING_LEISHMANIA_PARASITE_INFECTION	76	-0.383772	-1.37981	0.0415689	0.17987	0.143354	1716	tags=26%, list=11%, signal=24%	GNG10/DPEP2/GNAI3/CD247/GNB5/GNG11/GNAI2/GGT5/RHBDF2/LYN/GNB4/ADCY7/PRKAR2B/FGR/HCK/FYN/FCGR2A/PLK2/CD163/IL6
WP_THERMOGENESIS	WP_THERMOGENESIS	WP_THERMOGENESIS	105	0.386703	1.36653	0.0418006	0.18061	0.143944	4749	tags=46%, list=29%, signal=32%	ACSL5/PRKACB/PPARG/RPS6KA6/ACSL6/RPS6KA3/PPARGC1A/PRKAB1/MGLL/MAPK13/ADCY6/SLC25A20/SOS2/TSC2/GCG/ADCY3/CREB3L3/PLIN1/SMARCC2/PNPLA2/SOS1/SIRT6/ACSL3/CPT1A/ARID1B/PRKAA1/PRKG1/KDM3B/GNAS/TSC1/SMARCD2/PRKG2/ADCY5/KLB/SMARCC1/LIPE/ARID1A/DPF3/SMARCA2/CPT2/RPS6/SMARCE1/PRKACG/ADCY9/RHEB/NRAS/KDM3A/MAPK14
REACTOME_P75_NTR_RECEPTOR_MEDIATED_SIGNALLING	REACTOME_P75_NTR_RECEPTOR_MEDIATED_SIGNALLING	REACTOME_P75_NTR_RECEPTOR_MEDIATED_SIGNALLING	94	0.400207	1.38849	0.0420192	0.181188	0.144405	3724	tags=34%, list=23%, signal=26%	VAV3/NGEF/ARHGEF10L/ARHGEF5/MCF2L/ARHGEF9/KALRN/ARHGEF40/ARHGEF19/ABR/SOS2/ARHGEF1/ARHGEF18/ARHGEF37/PLEKHG5/VAV2/FGD4/PRDM4/ARHGEF11/TRIO/AKAP13/NET1/ARHGEF38/SOS1/TRAF6/RTN4/FGD1/SQSTM1/ARHGEF2/ARHGEF16/NGFR/ARHGEF7
REACTOME_THE_CITRIC_ACID_TCA_CYCLE_AND_RESPIRATORY_ELECTRON_TRANSPORT	REACTOME_THE_CITRIC_ACID_TCA_CYCLE_AND_RESPIRATORY_ELECTRON_TRANSPORT	REACTOME_THE_CITRIC_ACID_TCA_CYCLE_AND_RESPIRATORY_ELECTRON_TRANSPORT	144	0.354657	1.30741	0.0420561	0.181188	0.144405	5826	tags=51%, list=36%, signal=33%	ME3/PDK4/MPC2/SLC25A27/PDHA1/SUCLG2/CYCS/COX19/PDK2/PDP2/SUCLG1/NUBPL/D2HGDH/ACO2/COX5A/FAHD1/UQCRC2/LRPPRC/DLD/ETFDH/RXRA/PDK3/COX5B/UQCR11/COX20/COX4I1/NDUFS1/HAGH/SDHD/TMEM186/COX6A1/PDP1/NDUFA5/IDH3B/IDH2/MPC1/UQCRQ/COX7B/NDUFA7/COX6C/COX14/NDUFB11/NDUFB1/NDUFB5/NDUFB4/NNT/ADHFE1/NDUFA1/UCP3/NDUFAF4/PDPR/NDUFB3/NDUFV1/NDUFA10/IDH3G/OGDH/NDUFC1/NDUFB2/NDUFA2/UQCRB/NDUFB8/SLC16A8/SURF1/ETFA/IDH…
PID_EPHA2_FWD_PATHWAY	PID_EPHA2_FWD_PATHWAY	PID_EPHA2_FWD_PATHWAY	19	0.587975	1.47643	0.0423703	0.182278	0.145273	2047	tags=32%, list=13%, signal=28%	VAV3/PIK3R1/EFNA1/SRC/VAV2/PAK1
KEGG_INSULIN_SIGNALING_PATHWAY	KEGG_INSULIN_SIGNALING_PATHWAY	KEGG_INSULIN_SIGNALING_PATHWAY	133	0.364385	1.32962	0.0425197	0.182657	0.145575	2862	tags=28%, list=18%, signal=23%	PCK1/PRKACB/PKLR/INPP5D/PPARGC1A/PYGB/PRKAB1/PPP1R3D/PIK3R1/PDE3B/PRKAR2A/ACACB/PTPRF/SORBS1/PDE3A/PHKA2/SHC3/PDPK1/SOS2/PHKB/PCK2/MKNK2/PPP1CB/PRKCZ/TSC2/HK2/SHC2/PPP1R3B/PIK3CB/PTPN1/FBP2/MAPK3/SOS1/FBP1/INSR/CBLC/PRKAR1B
REACTOME_APC_C_CDC20_MEDIATED_DEGRADATION_OF_CYCLIN_B	REACTOME_APC_C_CDC20_MEDIATED_DEGRADATION_OF_CYCLIN_B	REACTOME_APC_C_CDC20_MEDIATED_DEGRADATION_OF_CYCLIN_B	23	-0.524441	-1.44718	0.0427122	0.182956	0.145813	3720	tags=48%, list=23%, signal=37%	ANAPC11/UBB/CDC23/ANAPC10/CDK1/UBA52/UBE2E1/CDC27/CCNB1/CDC20/UBE2S
WP_ARYL_HYDROCARBON_RECEPTOR_PATHWAY_WP2873	WP_ARYL_HYDROCARBON_RECEPTOR_PATHWAY_WP2873	WP_ARYL_HYDROCARBON_RECEPTOR_PATHWAY_WP2873	41	-0.436841	-1.37604	0.0427122	0.182956	0.145813	1221	tags=24%, list=8%, signal=23%	SLC7A5/AHR/MYOF/HSP90AA1/CAP2/IFNG/TGFB1/CYP1B1/IL1B/SERPINB2
PID_INTEGRIN_A4B1_PATHWAY	PID_INTEGRIN_A4B1_PATHWAY	PID_INTEGRIN_A4B1_PATHWAY	32	-0.479582	-1.42093	0.0428095	0.183049	0.145888	2703	tags=34%, list=17%, signal=29%	JAM2/ITGB1/THBS1/ITGA4/CD81/MDK/FN1/VCAM1/CD14/THBS2/SPP1
WP_EXTRACELLULAR_VESICLES_IN_THE_CROSSTALK_OF_CARDIAC_CELLS	WP_EXTRACELLULAR_VESICLES_IN_THE_CROSSTALK_OF_CARDIAC_CELLS	WP_EXTRACELLULAR_VESICLES_IN_THE_CROSSTALK_OF_CARDIAC_CELLS	19	-0.557795	-1.48111	0.0429087	0.183049	0.145888	1977	tags=37%, list=12%, signal=32%	CD81/SOD1/HSPB1/BIRC5/MMP9/IL6/SPP1
KEGG_ALDOSTERONE_REGULATED_SODIUM_REABSORPTION	KEGG_ALDOSTERONE_REGULATED_SODIUM_REABSORPTION	KEGG_ALDOSTERONE_REGULATED_SODIUM_REABSORPTION	40	0.488271	1.43631	0.0429184	0.183049	0.145888	2763	tags=38%, list=17%, signal=31%	HSD11B2/SCNN1B/NR3C2/SCNN1A/ATP1A1/PIK3R1/NEDD4L/ATP1B1/PDPK1/SCNN1G/PRKCA/ATP1B2/PIK3CB/MAPK3/INSR
REACTOME_PHOSPHOLIPID_METABOLISM	REACTOME_PHOSPHOLIPID_METABOLISM	REACTOME_PHOSPHOLIPID_METABOLISM	189	0.344933	1.3172	0.0434783	0.184749	0.147242	3439	tags=30%, list=21%, signal=24%	GPCPD1/PLA2G4F/CPNE7/INPP5J/GDPD5/INPP5D/GPD1L/SLC44A4/MGLL/PIP5K1B/SLC44A3/CHPT1/PIK3R1/PLEKHA6/PCTP/OCRL/CPNE1/CHKA/PIK3C2B/LPIN3/TNFAIP8L3/CRLS1/GDPD3/PLEKHA5/PLBD1/PLA2G12A/CDS1/CDS2/PLA2G6/DGAT1/SLC44A5/CPNE6/PLEKHA1/DGAT2/SLC44A1/SYNJ2/MTM1/PNPLA7/STARD10/AGPAT2/PIK3CB/HADHA/PLD1/PNPLA2/ETNK2/GDPD1/CHKB/CSNK2A1/ACHE/ALPI/MTMR3/MTMR14/SBF2/PLD4/BMX/PLA2R1/SLC44A2
WP_5Q35_COPY_NUMBER_VARIATION	WP_5Q35_COPY_NUMBER_VARIATION	WP_5Q35_COPY_NUMBER_VARIATION	100	0.38819	1.36115	0.0434783	0.184749	0.147242	3056	tags=31%, list=19%, signal=25%	CDHR5/DRD2/CDHR2/JUN/ANKS4B/MYO7B/INPP5D/CAPN3/USH1C/FGFR4/RNF44/PIK3R1/PLCG1/ABL1/GAB1/BRCC3/HIP1R/SRC/COX5A/IGF1R/COX5B/PNPLA2/ARFGAP2/SOS1/FAM193B/HIC2/COX4I1/RAB24/SIMC1/HIGD2A/MYC
PID_TCR_CALCIUM_PATHWAY	PID_TCR_CALCIUM_PATHWAY	PID_TCR_CALCIUM_PATHWAY	27	-0.507738	-1.44638	0.0435031	0.184749	0.147242	2295	tags=37%, list=14%, signal=32%	FASLG/PPP3R1/FOS/CSF2/NFATC1/BATF3/IL2RA/IFNG/FOSL1/PTGS2
WP_AGE_RAGE_PATHWAY	WP_AGE_RAGE_PATHWAY	WP_AGE_RAGE_PATHWAY	66	-0.393353	-1.359	0.0437867	0.185625	0.147941	2687	tags=32%, list=17%, signal=27%	PRKCB/DDOST/ALPL/NOS2/SMAD2/EZR/SOD1/AKT1/NCF1/MSN/JAK2/MMP14/MMP2/MMP7/HIF1A/IRS1/MMP13/STAT1/MSR1/MMP9/PLA2G4A
REACTOME_MITOCHONDRIAL_TRANSLATION	REACTOME_MITOCHONDRIAL_TRANSLATION	REACTOME_MITOCHONDRIAL_TRANSLATION	91	-0.363384	-1.33666	0.0438343	0.185625	0.147941	5192	tags=48%, list=32%, signal=33%	MRPL14/MRPL20/MRPL16/MRPL51/MRPL10/MRPS23/MRPL9/MRPL47/MRPS18C/MRPL40/MRPL3/MRPL32/MRPL19/MRPL37/MRPL44/TUFM/MRPL28/CHCHD1/MRPS6/MRPL11/MRPL4/MRPL39/MRPL22/MRPL27/GFM2/MRPS27/MRPS7/OXA1L/MRPL18/MRPS18A/MRPL54/MRPL43/MRPS15/MRPL21/MRPS12/MRPL55/GADD45GIP1/MRPL17/MRPS28/MRPS2/MRPS10/MRPL52/MRPL2/MRPS21
WP_G1_TO_S_CELL_CYCLE_CONTROL	WP_G1_TO_S_CELL_CYCLE_CONTROL	WP_G1_TO_S_CELL_CYCLE_CONTROL	64	-0.401183	-1.37772	0.0445616	0.188424	0.150172	2991	tags=39%, list=19%, signal=32%	CREB3/CDK1/CCNE2/PRIM1/MDM2/MCM7/CDKN2C/PRIM2/CCND1/MCM3/CDKN1C/RPA1/MCM6/RPA2/TFDP1/MCM2/MCM5/MCM4/CDC45/ORC1/POLE2/MNAT1/CDKN2A/CCNB1/CREB3L1
KEGG_LYSOSOME	KEGG_LYSOSOME	KEGG_LYSOSOME	116	-0.337538	-1.28986	0.0446218	0.188424	0.150172	3066	tags=30%, list=19%, signal=25%	GLA/AP3M2/M6PR/AP4S1/CTNS/PSAP/TCIRG1/MANBA/ACP2/NPC2/ARSB/MCOLN1/CTSD/AP3S1/AP1S2/GAA/NPC1/CTSW/ATP6V0B/GM2A/LIPA/GNS/CTSC/LAMP3/CTSB/HYAL1/LGMN/PPT1/SLC11A1/AP1S3/ACP5/CTSK/CTSL/LAPTM5/CTSE
REACTOME_GLYCOLYSIS	REACTOME_GLYCOLYSIS	REACTOME_GLYCOLYSIS	71	-0.392629	-1.39637	0.0455249	0.191966	0.152994	3131	tags=45%, list=19%, signal=36%	NUP93/NUP37/ENO3/NUP43/PPP2CA/NUP133/NUP205/NUP62/NUP160/NUP50/NUP35/HK1/TPI1/NUP155/PGK1/PGAM2/GPI/SEC13/NUP210/PFKFB4/ALDOA/NDC1/GAPDH/PFKP/PGAM1/PKM/BPGM/ENO1/PFKFB3/SEH1L/HK3/ENO2
REACTOME_REGULATION_OF_PLK1_ACTIVITY_AT_G2_M_TRANSITION	REACTOME_REGULATION_OF_PLK1_ACTIVITY_AT_G2_M_TRANSITION	REACTOME_REGULATION_OF_PLK1_ACTIVITY_AT_G2_M_TRANSITION	85	-0.367834	-1.33574	0.0455971	0.191998	0.15302	3728	tags=38%, list=23%, signal=29%	HAUS3/PAFAH1B1/DYNLL1/CETN2/OPTN/UBB/ODF2/HAUS6/ACTR1A/SDCCAG8/CDK1/HAUS8/UBA52/PPP1R12A/CEP78/CEP192/NEDD1/PLK4/CEP135/TUBA4A/YWHAE/TUBB/PLK1/NEK2/TUBG1/HSP90AA1/HAUS1/TUBA1A/CCNB1/CEP76/AJUBA/PRKAR2B
REACTOME_CARNITINE_METABOLISM	REACTOME_CARNITINE_METABOLISM	REACTOME_CARNITINE_METABOLISM	13	0.658218	1.51033	0.0457875	0.192528	0.153442	4308	tags=54%, list=27%, signal=40%	ACACB/SLC22A5/SLC25A20/RXRA/CPT1A/THRSP/CPT2
REACTOME_RETROGRADE_TRANSPORT_AT_THE_TRANS_GOLGI_NETWORK	REACTOME_RETROGRADE_TRANSPORT_AT_THE_TRANS_GOLGI_NETWORK	REACTOME_RETROGRADE_TRANSPORT_AT_THE_TRANS_GOLGI_NETWORK	47	0.466635	1.42216	0.0460751	0.193463	0.154188	4077	tags=53%, list=25%, signal=40%	TGOLN2/STX16/ARFRP1/IGF2R/GOLGA4/VPS51/SYS1/GCC2/COG8/NAPB/RGP1/GCC1/RAB9A/NSF/COG2/VPS52/RAB9B/COG5/GOLGA1/COG3/VTI1A/NAPA/COG7/VPS54/TMF1
REACTOME_PROTEIN_FOLDING	REACTOME_PROTEIN_FOLDING	REACTOME_PROTEIN_FOLDING	87	-0.377169	-1.37459	0.0466737	0.195318	0.155666	2972	tags=30%, list=18%, signal=25%	CCT8/CCNE2/GNB1/TBCA/ACTB/GNG2/CCT2/TUBB3/PFDN2/TUBA4A/WRAP53/FBXL5/GNG10/TUBA1C/GNB5/TUBB2B/GNG11/TUBA1B/KIFC3/TUBA1A/GNB4/TUBB2A/FBXO6/TUBB6/GNA15/SPHK1
REACTOME_RECRUITMENT_OF_NUMA_TO_MITOTIC_CENTROSOMES	REACTOME_RECRUITMENT_OF_NUMA_TO_MITOTIC_CENTROSOMES	REACTOME_RECRUITMENT_OF_NUMA_TO_MITOTIC_CENTROSOMES	87	-0.377311	-1.37511	0.0466737	0.195318	0.155666	3728	tags=39%, list=23%, signal=30%	HAUS3/PAFAH1B1/DYNLL1/CETN2/ODF2/HAUS6/ACTR1A/SDCCAG8/CDK1/HAUS8/CEP78/CEP192/NEDD1/PLK4/TUBB3/CEP135/TUBA4A/YWHAE/TUBA1C/TUBG2/TUBB/PLK1/TUBB2B/MZT1/NEK2/TUBA1B/TUBG1/HSP90AA1/HAUS1/TUBA1A/CEP76/TUBB2A/PRKAR2B/TUBB6
WP_T_CELL_ANTIGEN_RECEPTOR_TCR_PATHWAY_DURING_STAPHYLOCOCCUS_AUREUS_INFECTION	WP_T_CELL_ANTIGEN_RECEPTOR_TCR_PATHWAY_DURING_STAPHYLOCOCCUS_AUREUS_INFECTION	WP_T_CELL_ANTIGEN_RECEPTOR_TCR_PATHWAY_DURING_STAPHYLOCOCCUS_AUREUS_INFECTION	62	-0.382035	-1.30842	0.0467136	0.195318	0.155666	2223	tags=31%, list=14%, signal=27%	ITK/FOS/RRAS/TNF/CD4/CD3D/AKT1/MALT1/ICOS/AHSA1/CTLA4/CSF2/MAP3K8/CD8A/IFNG/PTPRC/LCP2/FYN/LCK
PID_HIF1_TFPATHWAY	PID_HIF1_TFPATHWAY	PID_HIF1_TFPATHWAY	66	-0.391457	-1.35245	0.0468865	0.195766	0.156023	2833	tags=41%, list=18%, signal=34%	EGLN3/HK1/BHLHE40/PGK1/EGLN1/NOS2/LDHA/FOS/AKT1/CITED2/NPM1/ETS1/HMOX1/ALDOA/PKM/ENG/CA9/FECH/ENO1/ADM/PFKFB3/HIF1A/SLC2A1/NT5E/ITGB2/SERPINE1/CXCR4
WP_TCA_CYCLE_AND_DEFICIENCY_OF_PYRUVATE_DEHYDROGENASE_COMPLEX_PDHC	WP_TCA_CYCLE_AND_DEFICIENCY_OF_PYRUVATE_DEHYDROGENASE_COMPLEX_PDHC	WP_TCA_CYCLE_AND_DEFICIENCY_OF_PYRUVATE_DEHYDROGENASE_COMPLEX_PDHC	16	0.613931	1.49444	0.0470163	0.196033	0.156236	2059	tags=31%, list=13%, signal=27%	PCK1/PDHA1/SUCLG2/PC/DLD
REACTOME_CD28_DEPENDENT_PI3K_AKT_SIGNALING	REACTOME_CD28_DEPENDENT_PI3K_AKT_SIGNALING	REACTOME_CD28_DEPENDENT_PI3K_AKT_SIGNALING	22	-0.544916	-1.4673	0.0472419	0.196698	0.156766	2511	tags=45%, list=16%, signal=38%	CD28/PIK3R3/THEM4/AKT1/CD80/AKT3/MAP3K8/CD86/FYN/LCK
REACTOME_TRANSCRIPTIONAL_REGULATION_BY_SMALL_RNAS	REACTOME_TRANSCRIPTIONAL_REGULATION_BY_SMALL_RNAS	REACTOME_TRANSCRIPTIONAL_REGULATION_BY_SMALL_RNAS	45	-0.431355	-1.38665	0.0473448	0.196851	0.156888	4067	tags=44%, list=25%, signal=33%	NUP93/NUP37/NUP43/NUP133/NUP205/NUP62/NUP160/NUP50/NUP35/NUP155/SEC13/NUP210/POLR2E/POLR2A/POLR2I/POLR2G/RAN/NDC1/POLR2L/SEH1L
REACTOME_SYNTHESIS_OF_BILE_ACIDS_AND_BILE_SALTS_VIA_24_HYDROXYCHOLESTEROL	REACTOME_SYNTHESIS_OF_BILE_ACIDS_AND_BILE_SALTS_VIA_24_HYDROXYCHOLESTEROL	REACTOME_SYNTHESIS_OF_BILE_ACIDS_AND_BILE_SALTS_VIA_24_HYDROXYCHOLESTEROL	13	0.650014	1.4915	0.047619	0.197715	0.157577	1038	tags=38%, list=6%, signal=36%	CYP39A1/AMACR/CYP27A1/AKR1C3/SLC27A2
KEGG_MEDICUS_REFERENCE_ITGA_B_RHOGEF_RHOA_SIGNALING_PATHWAY	KEGG_MEDICUS_REFERENCE_ITGA_B_RHOGEF_RHOA_SIGNALING_PATHWAY	KEGG_MEDICUS_REFERENCE_ITGA_B_RHOGEF_RHOA_SIGNALING_PATHWAY	22	-0.543999	-1.46482	0.0479316	0.198736	0.15839	3778	tags=59%, list=23%, signal=45%	RHOA/ITGB5/ITGB3/ITGB7/ITGB1/ITGA1/ITGA7/ITGA4/ITGA11/ITGAV/ITGA3/FN1/ITGA5
WP_JAK_STAT_SIGNALING_IN_THE_REGULATION_OF_BETA_CELLS	WP_JAK_STAT_SIGNALING_IN_THE_REGULATION_OF_BETA_CELLS	WP_JAK_STAT_SIGNALING_IN_THE_REGULATION_OF_BETA_CELLS	34	-0.466641	-1.40432	0.04851	0.200854	0.160078	1853	tags=29%, list=11%, signal=26%	AKT1/FOXM1/AKT3/HRAS/SOCS1/JAK2/IFNG/SOCS3/STAT1/IL6
REACTOME_BASIGIN_INTERACTIONS	REACTOME_BASIGIN_INTERACTIONS	REACTOME_BASIGIN_INTERACTIONS	24	-0.520437	-1.44376	0.0488453	0.201962	0.160961	2498	tags=38%, list=15%, signal=32%	ITGB1/BSG/L1CAM/ITGA3/SLC7A5/CAV1/SLC7A11/SLC7A7/MMP1
WP_ACE_INHIBITOR_PATHWAY	WP_ACE_INHIBITOR_PATHWAY	WP_ACE_INHIBITOR_PATHWAY	17	0.602819	1.48344	0.0490909	0.202415	0.161322	1042	tags=24%, list=6%, signal=22%	ACE2/NR3C2/AGT/REN
WP_GLYCOSPHINGOLIPID_METABOLISM	WP_GLYCOSPHINGOLIPID_METABOLISM	WP_GLYCOSPHINGOLIPID_METABOLISM	19	0.582403	1.46244	0.0490909	0.202415	0.161322	3892	tags=47%, list=24%, signal=36%	NEU4/GAL3ST1/B3GALT1/GBA2/B3GNT5/B4GALT5/NEU3/ARSA/B4GALT4
REACTOME_ACTIVATION_OF_GENE_EXPRESSION_BY_SREBF_SREBP	REACTOME_ACTIVATION_OF_GENE_EXPRESSION_BY_SREBF_SREBP	REACTOME_ACTIVATION_OF_GENE_EXPRESSION_BY_SREBF_SREBP	41	0.475379	1.39851	0.0498221	0.205146	0.163498	3563	tags=41%, list=22%, signal=32%	PPARA/ACACB/NCOA6/CHD9/SREBF2/CREBBP/RXRA/NCOA2/HMGCR/IDI1/FDFT1/SCD/HELZ2/SP1/MVD/MVK/TM7SF2
WP_NAD_METABOLISM_IN_ONCOGENE_INDUCED_SENESCENCE_AND_MITOCHONDRIAL_DYSFUNCTION_ASSOCIATED_SENESCENCE	WP_NAD_METABOLISM_IN_ONCOGENE_INDUCED_SENESCENCE_AND_MITOCHONDRIAL_DYSFUNCTION_ASSOCIATED_SENESCENCE	WP_NAD_METABOLISM_IN_ONCOGENE_INDUCED_SENESCENCE_AND_MITOCHONDRIAL_DYSFUNCTION_ASSOCIATED_SENESCENCE	22	-0.539998	-1.45405	0.0500005	0.205596	0.163858	1899	tags=27%, list=12%, signal=24%	G6PD/PARP1/HMGA1/SLC2A1/IL1B/IL6
WP_COPPER_HOMEOSTASIS	WP_COPPER_HOMEOSTASIS	WP_COPPER_HOMEOSTASIS	49	-0.431751	-1.41807	0.0501155	0.205785	0.164008	2108	tags=31%, list=13%, signal=27%	CCND1/SOD1/MT1F/AKT1/MT1G/ADAM9/SLC31A2/XAF1/PRNP/STEAP4/STEAP1/MT1H/MT1X/MT1E/MT2A
REACTOME_PROCESSIVE_SYNTHESIS_ON_THE_C_STRAND_OF_THE_TELOMERE	REACTOME_PROCESSIVE_SYNTHESIS_ON_THE_C_STRAND_OF_THE_TELOMERE	REACTOME_PROCESSIVE_SYNTHESIS_ON_THE_C_STRAND_OF_THE_TELOMERE	19	-0.548456	-1.45632	0.0502263	0.205956	0.164144	5069	tags=68%, list=31%, signal=47%	TERF2/RPA3/LIG1/POT1/WRN/PCNA/POLD2/POLD1/TINF2/RPA1/RPA2/ACD/FEN1
REACTOME_TRANSCRIPTIONAL_ACTIVATION_OF_MITOCHONDRIAL_BIOGENESIS	REACTOME_TRANSCRIPTIONAL_ACTIVATION_OF_MITOCHONDRIAL_BIOGENESIS	REACTOME_TRANSCRIPTIONAL_ACTIVATION_OF_MITOCHONDRIAL_BIOGENESIS	52	0.448498	1.39867	0.0503356	0.20599	0.164172	3622	tags=37%, list=22%, signal=28%	ACSS2/PPARGC1A/MTERF1/PPARA/ESRRA/NCOA6/CYCS/CHD9/PPARGC1B/SIRT5/CREBBP/RXRA/NCOA2/CRTC1/MEF2D/HELZ2/SIRT3/IDH2/CRTC3
WP_PTF1A_RELATED_REGULATORY_PATHWAY	WP_PTF1A_RELATED_REGULATORY_PATHWAY	WP_PTF1A_RELATED_REGULATORY_PATHWAY	10	0.691738	1.48197	0.0503731	0.20599	0.164172	2707	tags=40%, list=17%, signal=33%	PROX1/NOTCH1/HES1/PDX1
WP_MAPK_SIGNALING_PATHWAY	WP_MAPK_SIGNALING_PATHWAY	WP_MAPK_SIGNALING_PATHWAY	235	-0.298098	-1.23888	0.0505333	0.206362	0.164468	2320	tags=22%, list=14%, signal=19%	RRAS2/FASLG/RELB/PPP3R1/MAP2K4/FOS/GNA12/TGFB2/MAPK11/RRAS/TNF/AKT1/FGFR1/MAP4K4/STK3/CACNA2D1/MAP3K5/NFKB2/TGFBR1/PTPN7/HSPB1/HSPA2/RASGRP3/AKT3/DUSP2/FGF2/FGF7/RAC2/HRAS/RAC3/MAP3K8/PDGFRB/DUSP7/NFATC1/FAS/FLNC/RASGRP1/IL1R1/DUSP6/DUSP10/MRAS/RASGRF2/TGFB3/MAP3K6/HSPA6/TGFB1/FLNA/CD14/IL1B/IL1R2/PLA2G4A/DUSP4
REACTOME_SIGNALING_BY_MET	REACTOME_SIGNALING_BY_MET	REACTOME_SIGNALING_BY_MET	78	-0.374056	-1.33808	0.0506559	0.206579	0.164641	2498	tags=26%, list=15%, signal=22%	ITGB1/COL24A1/LAMA4/LAMC1/PTPN2/LAMC2/ITGA3/HRAS/LAMA5/TNS4/LAMA2/COL5A3/FN1/LAMB2/COL5A1/COL3A1/COL1A2/COL5A2/COL1A1/COL11A1
KEGG_RIBOFLAVIN_METABOLISM	KEGG_RIBOFLAVIN_METABOLISM	KEGG_RIBOFLAVIN_METABOLISM	14	0.629168	1.47006	0.0511883	0.20818	0.165917	756	tags=14%, list=5%, signal=14%	ENPP3/RFK
REACTOME_ERBB2_REGULATES_CELL_MOTILITY	REACTOME_ERBB2_REGULATES_CELL_MOTILITY	REACTOME_ERBB2_REGULATES_CELL_MOTILITY	14	0.625609	1.46174	0.0511883	0.20818	0.165917	2647	tags=36%, list=16%, signal=30%	EREG/ERBB3/EGFR/HBEGF/ERBB2
REACTOME_O_LINKED_GLYCOSYLATION_OF_MUCINS	REACTOME_O_LINKED_GLYCOSYLATION_OF_MUCINS	REACTOME_O_LINKED_GLYCOSYLATION_OF_MUCINS	58	0.43093	1.37435	0.0522876	0.21236	0.169249	2203	tags=28%, list=14%, signal=24%	MUC12/MUC20/B3GNT8/GALNT6/ST6GAL1/GCNT1/MUC13/B3GNT3/B3GNT6/GALNT7/GALNT3/GALNT10/GCNT7/GALNT11/B3GNT5/C1GALT1C1
WP_WNT_SIGNALING	WP_WNT_SIGNALING	WP_WNT_SIGNALING	109	0.37541	1.33815	0.0524642	0.212787	0.169589	2232	tags=26%, list=14%, signal=22%	PLCB4/NKD1/NOTUM/WIF1/VANGL2/JUN/TCF7/CXXC4/NFATC2/ROCK2/AXIN1/CCND2/GPC4/WNT5B/PLCB1/FZD5/FRAT2/WNT11/NKD2/KREMEN1/LRP6/FRAT1/WNT4/FZD9/PRKCA/SFRP5/TCF7L2/FZD10
REACTOME_METAL_ION_SLC_TRANSPORTERS	REACTOME_METAL_ION_SLC_TRANSPORTERS	REACTOME_METAL_ION_SLC_TRANSPORTERS	24	0.548114	1.45464	0.0528169	0.213926	0.170497	2170	tags=38%, list=13%, signal=33%	SLC39A5/SLC39A2/SLC40A1/HEPH/SLC30A2/SLC11A2/SLC30A10/SLC39A4/SLC30A1
REACTOME_REPRESSION_OF_WNT_TARGET_GENES	REACTOME_REPRESSION_OF_WNT_TARGET_GENES	REACTOME_REPRESSION_OF_WNT_TARGET_GENES	13	0.644743	1.47941	0.0531136	0.214836	0.171221	2196	tags=38%, list=14%, signal=33%	AXIN2/TLE2/TCF7/TLE1/TCF7L2
REACTOME_AFLATOXIN_ACTIVATION_AND_DETOXIFICATION	REACTOME_AFLATOXIN_ACTIVATION_AND_DETOXIFICATION	REACTOME_AFLATOXIN_ACTIVATION_AND_DETOXIFICATION	18	0.591538	1.48295	0.0534759	0.215715	0.171922	431	tags=22%, list=3%, signal=22%	DPEP1/GGT7/GGT6/CYP3A5
REACTOME_GLYOXYLATE_METABOLISM_AND_GLYCINE_DEGRADATION	REACTOME_GLYOXYLATE_METABOLISM_AND_GLYCINE_DEGRADATION	REACTOME_GLYOXYLATE_METABOLISM_AND_GLYCINE_DEGRADATION	29	0.522132	1.43118	0.0534759	0.215715	0.171922	2938	tags=34%, list=18%, signal=28%	DDO/PDHA1/AMT/PXMP2/DHTKD1/HOGA1/BCKDHB/DLD/AGXT/ALDH4A1
REACTOME_REGULATION_OF_PYRUVATE_DEHYDROGENASE_PDH_COMPLEX	REACTOME_REGULATION_OF_PYRUVATE_DEHYDROGENASE_PDH_COMPLEX	REACTOME_REGULATION_OF_PYRUVATE_DEHYDROGENASE_PDH_COMPLEX	16	0.605477	1.47386	0.0542495	0.21854	0.174173	2433	tags=44%, list=15%, signal=37%	PDK4/PDHA1/PDK2/PDP2/DLD/RXRA/PDK3
KEGG_MEDICUS_REFERENCE_GNRH_GNRHR_PLCB_PKC_SIGNALING_PATHWAY	KEGG_MEDICUS_REFERENCE_GNRH_GNRHR_PLCB_PKC_SIGNALING_PATHWAY	KEGG_MEDICUS_REFERENCE_GNRH_GNRHR_PLCB_PKC_SIGNALING_PATHWAY	20	0.569702	1.45442	0.0553571	0.2227	0.177489	2519	tags=25%, list=16%, signal=21%	PLCB4/PLCB1/GNA11/PRKCA/MAPK3
WP_INTERACTIONS_BETWEEN_LOXL4_AND_OXIDATIVE_STRESS_PATHWAY	WP_INTERACTIONS_BETWEEN_LOXL4_AND_OXIDATIVE_STRESS_PATHWAY	WP_INTERACTIONS_BETWEEN_LOXL4_AND_OXIDATIVE_STRESS_PATHWAY	16	-0.573023	-1.45565	0.0556793	0.223251	0.177928	1335	tags=31%, list=8%, signal=29%	FGF7/IGFBP7/FN1/ANXA5/TGFB1
KEGG_MEDICUS_REFERENCE_EP_NE_ADRB_PI3K_SIGNALING_PATHWAY	KEGG_MEDICUS_REFERENCE_EP_NE_ADRB_PI3K_SIGNALING_PATHWAY	KEGG_MEDICUS_REFERENCE_EP_NE_ADRB_PI3K_SIGNALING_PATHWAY	10	-0.661849	-1.49241	0.055794	0.223251	0.177928	2658	tags=60%, list=16%, signal=50%	GNAI1/AKT1/PIK3CD/GNAI3/AKT3/GNAI2
REACTOME_PREGNENOLONE_BIOSYNTHESIS	REACTOME_PREGNENOLONE_BIOSYNTHESIS	REACTOME_PREGNENOLONE_BIOSYNTHESIS	10	-0.661851	-1.49241	0.055794	0.223251	0.177928	768	tags=30%, list=5%, signal=29%	TSPO/FDXR/AKR1B1
WP_ACQUIRED_PARTIAL_LIPODYSTROPHY_BARRAQUER_SIMONS_SYNDROME	WP_ACQUIRED_PARTIAL_LIPODYSTROPHY_BARRAQUER_SIMONS_SYNDROME	WP_ACQUIRED_PARTIAL_LIPODYSTROPHY_BARRAQUER_SIMONS_SYNDROME	10	-0.661054	-1.49062	0.055794	0.223251	0.177928	2901	tags=60%, list=18%, signal=49%	C5/LMNA/LMNB2/ICMT/C3/CFD
REACTOME_EFFECTS_OF_PIP2_HYDROLYSIS	REACTOME_EFFECTS_OF_PIP2_HYDROLYSIS	REACTOME_EFFECTS_OF_PIP2_HYDROLYSIS	27	0.521459	1.42296	0.0561404	0.224335	0.178792	2661	tags=37%, list=16%, signal=31%	MGLL/DAGLA/ABHD12/ITPR2/DGKD/DGKQ/PRKCD/DGKH/PRKCQ/PRKCE
KEGG_PANCREATIC_CANCER	KEGG_PANCREATIC_CANCER	KEGG_PANCREATIC_CANCER	69	-0.381015	-1.33936	0.0565241	0.225316	0.179574	2396	tags=29%, list=15%, signal=25%	PIK3R3/SMAD2/RALBP1/RAD51/PIK3CG/CCND1/TGFB2/AKT1/PIK3CD/TGFBR1/AKT3/PIK3R5/RAC2/ARHGEF6/RAC3/CDKN2A/TGFB3/TGFB1/VEGFC/STAT1
REACTOME_SHC1_EVENTS_IN_ERBB2_SIGNALING	REACTOME_SHC1_EVENTS_IN_ERBB2_SIGNALING	REACTOME_SHC1_EVENTS_IN_ERBB2_SIGNALING	22	0.555216	1.45608	0.0565371	0.225316	0.179574	2661	tags=41%, list=16%, signal=34%	EREG/ERBB3/EGFR/PRKCD/HBEGF/PRKCA/SOS1/ERBB2/PRKCE
REACTOME_COPI_DEPENDENT_GOLGI_TO_ER_RETROGRADE_TRAFFIC	REACTOME_COPI_DEPENDENT_GOLGI_TO_ER_RETROGRADE_TRAFFIC	REACTOME_COPI_DEPENDENT_GOLGI_TO_ER_RETROGRADE_TRAFFIC	93	-0.354811	-1.31469	0.0568771	0.226368	0.180412	2949	tags=33%, list=18%, signal=27%	RACGAP1/CENPE/KDELR1/BNIP1/COPG1/KIF4A/KIF1B/KIF18B/TMED2/TMED10/TUBB3/TUBA4A/KIF11/KIF3A/TUBA1C/ARF4/COPZ2/KIF18A/TUBB2B/KLC1/KIF26B/TUBA1B/NAPG/KIF2C/ARFGAP3/TUBA1A/KIF20A/KLC2/TUBB2A/KDELR3/TUBB6
REACTOME_PROTEIN_PROTEIN_INTERACTIONS_AT_SYNAPSES	REACTOME_PROTEIN_PROTEIN_INTERACTIONS_AT_SYNAPSES	REACTOME_PROTEIN_PROTEIN_INTERACTIONS_AT_SYNAPSES	84	0.395007	1.33761	0.056962	0.226403	0.18044	2213	tags=23%, list=14%, signal=20%	PTPRD/PPFIBP2/SYT7/SHANK2/SLITRK6/PTPRF/EPB41L1/EPB41L5/CASK/EPB41L2/PPFIA3/LIN7B/LIN7A/SYT1/DLG1/NRXN2/DLGAP4/NRXN3/EPB41
KEGG_VALINE_LEUCINE_AND_ISOLEUCINE_DEGRADATION	KEGG_VALINE_LEUCINE_AND_ISOLEUCINE_DEGRADATION	KEGG_VALINE_LEUCINE_AND_ISOLEUCINE_DEGRADATION	43	0.463143	1.38805	0.0573913	0.227805	0.181558	4109	tags=53%, list=25%, signal=40%	HMGCS2/ABAT/ALDH1B1/ALDH2/ACADS/HADH/ACAA2/AUH/EHHADH/BCKDHB/DLD/HADHA/ACADSB/PCCA/HIBADH/ACAA1/ACADM/MCCC1/MCCC2/HMGCL/ACAT1/HADHB/ALDH7A1
WP_SMALL_CELL_LUNG_CANCER	WP_SMALL_CELL_LUNG_CANCER	WP_SMALL_CELL_LUNG_CANCER	95	-0.35604	-1.32079	0.0583138	0.231159	0.18423	2500	tags=33%, list=15%, signal=28%	NFKBIA/CHUK/MAX/CCNE2/RARB/TRAF3/ITGB1/LAMA4/PIK3R3/NOS2/LAMC1/CCND1/GADD45B/AKT1/PIK3CD/CDKN1C/DDB2/LAMC2/CKS2/CKS1B/ITGAV/COL4A2/AKT3/ITGA3/LAMA5/LAMA2/COL4A1/BIRC3/FN1/LAMB2/PTGS2
PID_CDC42_PATHWAY	PID_CDC42_PATHWAY	PID_CDC42_PATHWAY	68	0.412475	1.35509	0.0585366	0.231708	0.184668	4749	tags=47%, list=29%, signal=33%	JUN/MAP2K6/CDH1/PIK3R1/LIMK2/SRC/VAV2/PRKCZ/DLG1/WASL/HES5/EPS8/PAK1/PLD1/MAPK3/F2RL2/PRKCE/IQGAP1/MAP2K7/PAK4/RASGRF1/GSK3B/CTNNA1/ACTR2/ARHGEF7/EXOC7/CTNNB1/MAP3K11/RAF1/MAPK9/RAC1/MAPK14
WP_SULFATION_BIOTRANSFORMATION_REACTION	WP_SULFATION_BIOTRANSFORMATION_REACTION	WP_SULFATION_BIOTRANSFORMATION_REACTION	13	0.639104	1.46647	0.0586081	0.231708	0.184668	1539	tags=38%, list=10%, signal=35%	SULT1B1/SULT1A1/SULT1A2/SULT4A1/PAPSS2
REACTOME_LAGGING_STRAND_SYNTHESIS	REACTOME_LAGGING_STRAND_SYNTHESIS	REACTOME_LAGGING_STRAND_SYNTHESIS	20	-0.543376	-1.43553	0.0588235	0.232252	0.185102	3406	tags=75%, list=21%, signal=59%	POLA2/RPA3/LIG1/PCNA/POLD2/RFC1/POLD1/PRIM1/RFC5/PRIM2/RFC4/RFC2/RPA1/RPA2/FEN1
WP_EBSTEIN_BARR_VIRUS_LMP1_SIGNALING	WP_EBSTEIN_BARR_VIRUS_LMP1_SIGNALING	WP_EBSTEIN_BARR_VIRUS_LMP1_SIGNALING	23	-0.514682	-1.42025	0.0590909	0.232998	0.185697	1985	tags=26%, list=12%, signal=23%	TNF/NFKB2/HSP90AA1/PDLIM7/CCL5/CXCL8
REACTOME_REGULATION_OF_BETA_CELL_DEVELOPMENT	REACTOME_REGULATION_OF_BETA_CELL_DEVELOPMENT	REACTOME_REGULATION_OF_BETA_CELL_DEVELOPMENT	40	0.468183	1.37721	0.0595447	0.234059	0.186542	1333	tags=25%, list=8%, signal=23%	HNF1B/HNF4A/PKLR/FOXA2/NR5A2/NOTCH1/FOXA3/MAML2/HNF4G/HNF1A
KEGG_PROTEIN_EXPORT	KEGG_PROTEIN_EXPORT	KEGG_PROTEIN_EXPORT	22	-0.535522	-1.442	0.059633	0.234059	0.186542	3487	tags=55%, list=22%, signal=43%	SEC11A/OXA1L/SRP68/SRPRB/SEC61A1/SEC61G/SRP19/SEC11C/SRP72/HSPA5/SRP54/SPCS3
PID_P38_ALPHA_BETA_PATHWAY	PID_P38_ALPHA_BETA_PATHWAY	PID_P38_ALPHA_BETA_PATHWAY	28	-0.483135	-1.39291	0.059633	0.234059	0.186542	704	tags=21%, list=4%, signal=21%	DUSP10/LYN/FGR/HCK/FYN/LCK
PID_BETA_CATENIN_DEG_PATHWAY	PID_BETA_CATENIN_DEG_PATHWAY	PID_BETA_CATENIN_DEG_PATHWAY	16	0.595763	1.45021	0.0596745	0.234059	0.186542	3344	tags=38%, list=21%, signal=30%	AXIN2/AXIN1/FZD5/LRP6/CSNK1D/GSK3B
PID_AR_TF_PATHWAY	PID_AR_TF_PATHWAY	PID_AR_TF_PATHWAY	52	0.440667	1.37425	0.0604027	0.236046	0.188126	4749	tags=50%, list=29%, signal=35%	CEBPA/PDE9A/JUN/MAP2K6/TMPRSS2/TRIM24/SRC/CREBBP/ZMIZ2/RXRA/NCOA2/KAT7/REL/KLK3/GSK3B/EHMT2/SMARCC1/SMARCA2/GATA2/NCOA1/HOXB13/SMARCE1/NR2C2/SIRT1/RXRG/MAPK14
WNT_SIGNALING	WNT_SIGNALING	WNT_SIGNALING	81	0.393808	1.32786	0.0604134	0.236046	0.188126	2036	tags=25%, list=13%, signal=22%	NKD1/TLE2/WIF1/JUN/TCF7/RHOU/CXXC4/PITX2/AXIN1/CCND2/WNT5B/FZD5/WNT11/FRZB/BCL9/KREMEN1/LRP6/FRAT1/WNT4/TLE1
REACTOME_ZINC_TRANSPORTERS	REACTOME_ZINC_TRANSPORTERS	REACTOME_ZINC_TRANSPORTERS	15	0.614802	1.45698	0.0604396	0.236046	0.188126	2170	tags=33%, list=13%, signal=29%	SLC39A5/SLC39A2/SLC30A2/SLC39A4/SLC30A1
KEGG_GLYCEROLIPID_METABOLISM	KEGG_GLYCEROLIPID_METABOLISM	KEGG_GLYCEROLIPID_METABOLISM	41	0.469064	1.37993	0.0604982	0.236046	0.188126	2385	tags=32%, list=15%, signal=27%	CEL/MGLL/ALDH1B1/ALDH2/GLYCTK/DGKD/DGKQ/LPL/DGKH/DGAT1/DGAT2/GK/AGPAT2
REACTOME_ACTIVATION_OF_THE_TFAP2_AP_2_FAMILY_OF_TRANSCRIPTION_FACTORS	REACTOME_ACTIVATION_OF_THE_TFAP2_AP_2_FAMILY_OF_TRANSCRIPTION_FACTORS	REACTOME_ACTIVATION_OF_THE_TFAP2_AP_2_FAMILY_OF_TRANSCRIPTION_FACTORS	12	-0.63765	-1.49763	0.0611354	0.23822	0.189858	2804	tags=50%, list=17%, signal=41%	CITED4/CITED1/YEATS4/CITED2/TFAP2C/TFAP2A
KEGG_MEDICUS_REFERENCE_ASSEMBLY_AND_TRAFFICKING_OF_TELOMERASE	KEGG_MEDICUS_REFERENCE_ASSEMBLY_AND_TRAFFICKING_OF_TELOMERASE	KEGG_MEDICUS_REFERENCE_ASSEMBLY_AND_TRAFFICKING_OF_TELOMERASE	15	-0.580739	-1.45162	0.0614035	0.238724	0.19026	4164	tags=80%, list=26%, signal=59%	NAF1/NHP2/CCT5/CCT4/CCT6A/NOP10/CCT7/CCT8/RUVBL1/CCT2/RUVBL2/WRAP53
WP_INTERFERON_TYPE_I_SIGNALING_PATHWAYS	WP_INTERFERON_TYPE_I_SIGNALING_PATHWAYS	WP_INTERFERON_TYPE_I_SIGNALING_PATHWAYS	51	-0.411026	-1.36697	0.0614251	0.238724	0.19026	3525	tags=37%, list=22%, signal=29%	CRK/MAP3K1/IFNAR2/VAV1/STAT4/IRF9/RPS6KB1/PRMT1/PIK3CD/STAT2/EIF4EBP1/SOCS1/PTPRC/IRS1/SOCS3/PIAS3/STAT1/FYN/LCK
KEGG_NITROGEN_METABOLISM	KEGG_NITROGEN_METABOLISM	KEGG_NITROGEN_METABOLISM	22	0.550709	1.44426	0.0618375	0.240013	0.191287	941	tags=23%, list=6%, signal=21%	CA4/CA12/CA1/AMT/CA7
REACTOME_BIOTIN_TRANSPORT_AND_METABOLISM	REACTOME_BIOTIN_TRANSPORT_AND_METABOLISM	REACTOME_BIOTIN_TRANSPORT_AND_METABOLISM	11	0.65765	1.45574	0.0625	0.241954	0.192834	3857	tags=73%, list=24%, signal=55%	SLC5A6/ACACB/PC/PCCA/PDZD11/BTD/MCCC1/MCCC2
REACTOME_RESOLUTION_OF_ABASIC_SITES_AP_SITES	REACTOME_RESOLUTION_OF_ABASIC_SITES_AP_SITES	REACTOME_RESOLUTION_OF_ABASIC_SITES_AP_SITES	36	-0.451588	-1.37311	0.0625	0.241954	0.192834	4730	tags=64%, list=29%, signal=45%	RPA3/POLE4/PNKP/LIG1/PCNA/POLB/UNG/POLE3/POLD2/RFC1/APEX1/POLD1/TDG/RFC5/RFC4/RFC2/RPA1/RPA2/PARP1/NEIL2/FEN1/POLE2/PARP2
KEGG_MEDICUS_PATHOGEN_HCMV_US28_TO_GNB_G_PI3K_NFKB_SIGNALING_PATHWAY	KEGG_MEDICUS_PATHOGEN_HCMV_US28_TO_GNB_G_PI3K_NFKB_SIGNALING_PATHWAY	KEGG_MEDICUS_PATHOGEN_HCMV_US28_TO_GNB_G_PI3K_NFKB_SIGNALING_PATHWAY	31	-0.475423	-1.39087	0.062645	0.242083	0.192937	1853	tags=42%, list=11%, signal=37%	NFKBIA/CHUK/GNB1/GNG2/AKT1/PIK3CD/GNG10/AKT3/GNB5/GNG11/GNB4/IL6/CXCL8
WP_ANGIOPOIETIN_LIKE_PROTEIN_8_REGULATORY_PATHWAY	WP_ANGIOPOIETIN_LIKE_PROTEIN_8_REGULATORY_PATHWAY	WP_ANGIOPOIETIN_LIKE_PROTEIN_8_REGULATORY_PATHWAY	129	0.360319	1.31431	0.0626959	0.242083	0.192937	3576	tags=33%, list=22%, signal=26%	PCK1/CYP2B6/RPS6KA6/MAP2K6/FOXO3/RPS6KA3/PRKAB1/PIK3R1/MLXIPL/MAPK13/SREBF2/SHC3/PDPK1/SOS2/LPL/MAP2K5/CYP3A4/TSC2/THRB/MAP3K2/SHC2/RXRA/PIK3CB/PTPN1/MAPK3/SOS1/FBP1/SESN3/INSR/CBLC/MAP2K7/RICTOR/THRA/MAP3K10/MAP3K13/PRKAA1/SCD/GSK3B/MAP3K12/SLC2A4/TSC1/MINK1/MAP4K2
REACTOME_ATF4_ACTIVATES_GENES_IN_RESPONSE_TO_ENDOPLASMIC_RETICULUM_STRESS	REACTOME_ATF4_ACTIVATES_GENES_IN_RESPONSE_TO_ENDOPLASMIC_RETICULUM_STRESS	REACTOME_ATF4_ACTIVATES_GENES_IN_RESPONSE_TO_ENDOPLASMIC_RETICULUM_STRESS	27	-0.487134	-1.38769	0.0629922	0.242912	0.193597	105	tags=33%, list=1%, signal=33%	EXOSC2/EXOSC8/NFYB/EXOSC3/IGFBP1/EXOSC4/EXOSC9/CCL2/CXCL8
PID_LYSOPHOSPHOLIPID_PATHWAY	PID_LYSOPHOSPHOLIPID_PATHWAY	PID_LYSOPHOSPHOLIPID_PATHWAY	64	-0.380649	-1.3072	0.0631609	0.243247	0.193865	2366	tags=27%, list=15%, signal=23%	GNG2/GNAZ/FOS/GNA12/AKT1/GNAI3/PRKD1/HRAS/TIAM1/GNAI2/MMP2/LYN/ADCY7/GNA15/MMP9/IL6/CXCL8
KEGG_MEDICUS_PATHOGEN_HBV_HBX_TO_CREB_MEDIATED_TRANSCRIPTION	KEGG_MEDICUS_PATHOGEN_HBV_HBX_TO_CREB_MEDIATED_TRANSCRIPTION	KEGG_MEDICUS_PATHOGEN_HBV_HBX_TO_CREB_MEDIATED_TRANSCRIPTION	13	-0.618882	-1.47962	0.0635965	0.244446	0.19482	468	tags=15%, list=3%, signal=15%	CREB3L1/CXCL8
KEGG_BLADDER_CANCER	KEGG_BLADDER_CANCER	KEGG_BLADDER_CANCER	41	-0.433985	-1.36705	0.0636364	0.244446	0.19482	1213	tags=22%, list=8%, signal=20%	HRAS/CDKN2A/MMP2/DAPK1/VEGFC/TYMP/MMP9/CXCL8/MMP1
REACTOME_REGULATION_OF_GENE_EXPRESSION_IN_BETA_CELLS	REACTOME_REGULATION_OF_GENE_EXPRESSION_IN_BETA_CELLS	REACTOME_REGULATION_OF_GENE_EXPRESSION_IN_BETA_CELLS	20	0.560153	1.43004	0.0642857	0.246622	0.196555	1333	tags=30%, list=8%, signal=28%	HNF4A/PKLR/FOXA2/FOXA3/HNF4G/HNF1A
REACTOME_EXPORT_OF_VIRAL_RIBONUCLEOPROTEINS_FROM_NUCLEUS	REACTOME_EXPORT_OF_VIRAL_RIBONUCLEOPROTEINS_FROM_NUCLEUS	REACTOME_EXPORT_OF_VIRAL_RIBONUCLEOPROTEINS_FROM_NUCLEUS	30	-0.480378	-1.39479	0.0645161	0.247187	0.197005	4626	tags=57%, list=29%, signal=41%	NUP98/NUP54/NUP93/NUP37/NUP43/NUP133/NUP205/NUP62/NUP160/NUP50/NUP35/NUP155/SEC13/NUP210/RAN/NDC1/SEH1L
WP_HIPPO_MERLIN_SIGNALING_DYSREGULATION	WP_HIPPO_MERLIN_SIGNALING_DYSREGULATION	WP_HIPPO_MERLIN_SIGNALING_DYSREGULATION	115	-0.334201	-1.27241	0.0647833	0.247892	0.197567	3030	tags=36%, list=19%, signal=29%	TEK/CDH13/CD44/PPP1CA/KDR/PPP1R12A/ITGB7/ITGB1/ITGA1/ITGA7/CCND1/ITGA4/CDH2/ITGA11/FGFR1/ITGAL/STK3/ITGAE/PAK6/ITGAV/LATS2/FOXM1/ITGA3/CDH16/TEAD4/HRAS/CDH5/PDGFRB/EPHA2/SAV1/CSF1R/WWTR1/ITGAX/AJUBA/CDH3/PRKAR2B/CDH11/ITGA5/ITGB2/ITGAM/CXCL10
REACTOME_CYTOCHROME_C_MEDIATED_APOPTOTIC_RESPONSE	REACTOME_CYTOCHROME_C_MEDIATED_APOPTOTIC_RESPONSE	REACTOME_CYTOCHROME_C_MEDIATED_APOPTOTIC_RESPONSE	13	0.634589	1.45611	0.0659341	0.251971	0.200818	3575	tags=46%, list=22%, signal=36%	APIP/CYCS/XIAP/CASP7/MAPK3/APAF1
WP_VALPROIC_ACID_PATHWAY	WP_VALPROIC_ACID_PATHWAY	WP_VALPROIC_ACID_PATHWAY	12	0.650936	1.46919	0.0661765	0.252574	0.201298	3216	tags=50%, list=20%, signal=40%	CYP2B6/ABAT/EHHADH/HADHA/ACADSB/ACSM1
REACTOME_EXTRA_NUCLEAR_ESTROGEN_SIGNALING	REACTOME_EXTRA_NUCLEAR_ESTROGEN_SIGNALING	REACTOME_EXTRA_NUCLEAR_ESTROGEN_SIGNALING	74	-0.36044	-1.29193	0.0664962	0.253469	0.202011	2396	tags=32%, list=15%, signal=28%	PIK3R3/GNG2/FOS/PRMT1/CCND1/S1PR3/AKT1/GNG10/HSPB1/GNAI3/AKT3/GNB5/HRAS/GNG11/HSP90AA1/GNAI2/MMP2/MMP7/GNB4/CAV1/CAV2/MMP9/SPHK1/MMP3
REACTOME_MITOTIC_PROPHASE	REACTOME_MITOTIC_PROPHASE	REACTOME_MITOTIC_PROPHASE	79	-0.366122	-1.31364	0.0666858	0.253867	0.202328	4067	tags=47%, list=25%, signal=35%	NUP93/LPIN1/NUP37/SMC4/SMC2/MCPH1/NUP43/PPP2CA/LPIN2/NCAPG2/NEK7/NUP133/NUP205/NCAPD3/NUP62/TMPO/NUP160/CDK1/USO1/NUP50/LMNA/BANF1/BLZF1/NUP35/PRKCB/CTDNEP1/NUP155/ARPP19/SEC13/NUP210/VRK2/MASTL/NDC1/PLK1/VRK1/SEH1L/CCNB1
SA_B_CELL_RECEPTOR_COMPLEXES	SA_B_CELL_RECEPTOR_COMPLEXES	SA_B_CELL_RECEPTOR_COMPLEXES	24	0.539863	1.43274	0.0669014	0.254362	0.202723	2556	tags=38%, list=16%, signal=32%	VAV3/JUN/RPS6KA3/SYK/MAPK8IP3/BLNK/VAV2/MAPK3/SOS1
REACTOME_POST_TRANSLATIONAL_MODIFICATION_SYNTHESIS_OF_GPI_ANCHORED_PROTEINS	REACTOME_POST_TRANSLATIONAL_MODIFICATION_SYNTHESIS_OF_GPI_ANCHORED_PROTEINS	REACTOME_POST_TRANSLATIONAL_MODIFICATION_SYNTHESIS_OF_GPI_ANCHORED_PROTEINS	81	-0.361998	-1.30465	0.0670241	0.254504	0.202836	1078	tags=20%, list=7%, signal=19%	PSCA/LYPD6B/PRSS21/LYPD3/GP2/NRN1/THY1/CD52/PLAUR/VNN2/VNN1/MSLN/LY6E/ULBP2/CD109/FCGR3B
KEGG_RENIN_ANGIOTENSIN_SYSTEM	KEGG_RENIN_ANGIOTENSIN_SYSTEM	KEGG_RENIN_ANGIOTENSIN_SYSTEM	17	0.587526	1.44581	0.0672727	0.255119	0.203326	1042	tags=24%, list=6%, signal=22%	ACE2/AGT/CTSA/REN
REACTOME_SIGNALING_BY_ERBB2_IN_CANCER	REACTOME_SIGNALING_BY_ERBB2_IN_CANCER	REACTOME_SIGNALING_BY_ERBB2_IN_CANCER	25	0.524422	1.41357	0.0673575	0.255119	0.203326	2647	tags=36%, list=16%, signal=30%	EREG/PIK3R1/PLCG1/ERBB3/GAB1/EGFR/HBEGF/SOS1/ERBB2
KEGG_PYRIMIDINE_METABOLISM	KEGG_PYRIMIDINE_METABOLISM	KEGG_PYRIMIDINE_METABOLISM	91	-0.349878	-1.28698	0.0681199	0.257678	0.205366	3669	tags=38%, list=23%, signal=30%	POLR3D/POLR3B/DCTD/POLE3/POLD2/NUDT2/DCK/POLR3K/POLD1/RRM1/PRIM1/POLR1C/PRIM2/RRM2B/POLR2E/POLR2A/POLR2I/POLR2G/POLR3GL/RRM2/NME1/PNP/CMPK2/POLE2/POLR2L/TK1/CTPS1/ENTPD1/CDA/DPYD/POLR3G/UPP1/TYMS/NT5E/TYMP
KEGG_MEDICUS_REFERENCE_TYPE_I_IFN_SIGNALING_PATHWAY	KEGG_MEDICUS_REFERENCE_TYPE_I_IFN_SIGNALING_PATHWAY	KEGG_MEDICUS_REFERENCE_TYPE_I_IFN_SIGNALING_PATHWAY	21	-0.531793	-1.41723	0.0686499	0.258947	0.206377	3455	tags=24%, list=21%, signal=19%	IFNAR2/IRF9/STAT2/IRF7/STAT1
KEGG_DILATED_CARDIOMYOPATHY	KEGG_DILATED_CARDIOMYOPATHY	KEGG_DILATED_CARDIOMYOPATHY	88	-0.351716	-1.28256	0.0686813	0.258947	0.206377	2645	tags=30%, list=16%, signal=25%	ITGB7/SGCD/ITGB1/ACTB/TPM2/ITGA1/ITGA7/ITGA4/TGFB2/TNF/ADRB1/SGCB/ITGA11/CACNA2D1/ITGAV/ITGA3/TNNI3/LAMA2/ACTC1/DES/TGFB3/PLN/ADCY7/TGFB1/TNNC1/ITGA5
WP_SREBF_AND_MIR33_IN_CHOLESTEROL_AND_LIPID_HOMEOSTASIS	WP_SREBF_AND_MIR33_IN_CHOLESTEROL_AND_LIPID_HOMEOSTASIS	WP_SREBF_AND_MIR33_IN_CHOLESTEROL_AND_LIPID_HOMEOSTASIS	16	0.587222	1.42942	0.0687161	0.258947	0.206377	3286	tags=44%, list=20%, signal=35%	PPARGC1A/PPARA/SREBF2/SIRT6/HMGCR/PRKAA1/SCD
WP_METABOLIC_REPROGRAMMING_IN_COLON_CANCER	WP_METABOLIC_REPROGRAMMING_IN_COLON_CANCER	WP_METABOLIC_REPROGRAMMING_IN_COLON_CANCER	39	-0.434331	-1.34876	0.0692841	0.260757	0.20782	3045	tags=44%, list=19%, signal=35%	ACLY/PYCR1/PGD/PGK1/PPAT/LDHA/GPI/G6PD/DLST/GAPDH/PGAM1/PKM/SHMT2/ENO1/PSAT1/SLC2A1/HK3
PID_GMCSF_PATHWAY	PID_GMCSF_PATHWAY	PID_GMCSF_PATHWAY	36	-0.444509	-1.35159	0.0694444	0.26103	0.208038	1213	tags=31%, list=8%, signal=28%	FOS/IRF8/HRAS/CSF2/CSF2RA/JAK2/LYN/STAT1/OSM/CSF2RB/CCL2
REACTOME_DAP12_INTERACTIONS	REACTOME_DAP12_INTERACTIONS	REACTOME_DAP12_INTERACTIONS	35	-0.44959	-1.35105	0.0696056	0.261306	0.208258	1213	tags=26%, list=8%, signal=24%	HRAS/KLRD1/LCP2/TREM2/FYN/LCK/TYROBP/CLEC5A/TREM1
PID_PI3K_PLC_TRK_PATHWAY	PID_PI3K_PLC_TRK_PATHWAY	PID_PI3K_PLC_TRK_PATHWAY	35	0.477294	1.36345	0.0700525	0.262099	0.20889	1757	tags=26%, list=11%, signal=23%	FOXO3/PIK3R1/PLCG1/EPB41L1/YWHAB/GAB1/PDPK1/SRC/PRKCD
WP_CLOCK_CONTROLLED_AUTOPHAGY_IN_BONE_METABOLISM	WP_CLOCK_CONTROLLED_AUTOPHAGY_IN_BONE_METABOLISM	WP_CLOCK_CONTROLLED_AUTOPHAGY_IN_BONE_METABOLISM	78	-0.361438	-1.29294	0.0700809	0.262099	0.20889	1853	tags=19%, list=11%, signal=17%	AKT1/RUNX2/ATG101/BMP4/CRY1/WNT5A/NFATC1/TNFRSF11B/JAK2/SERPINF1/TGFB1/CTSK/DKK1/IL6/CTHRC1
WP_REGULATORY_CIRCUITS_OF_THE_STAT3_SIGNALING_PATHWAY	WP_REGULATORY_CIRCUITS_OF_THE_STAT3_SIGNALING_PATHWAY	WP_REGULATORY_CIRCUITS_OF_THE_STAT3_SIGNALING_PATHWAY	78	-0.361617	-1.29358	0.0700809	0.262099	0.20889	2729	tags=36%, list=17%, signal=30%	AGTR1/STMN1/PRKCB/IL27RA/IL12RB2/JAK3/IL3RA/IL9R/MAPK11/IL7R/IL20RB/IL15RA/DUSP2/IL21R/SETD7/F2R/CSF2RA/PDGFRB/JAK2/IL2RA/IL2RB/IL10RA/PTPRC/SOCS3/PIAS3/CSF3R/OSMR/CSF2RB
WP_CLEAR_CELL_RENAL_CELL_CARCINOMA_PATHWAYS	WP_CLEAR_CELL_RENAL_CELL_CARCINOMA_PATHWAYS	WP_CLEAR_CELL_RENAL_CELL_CARCINOMA_PATHWAYS	83	-0.357033	-1.29277	0.0702703	0.262478	0.209191	3065	tags=40%, list=19%, signal=32%	AKT1S1/ACLY/CDH13/KDR/HK1/TPI1/PHGDH/PDGFB/PGK1/SSPN/TOX2/LDHA/GPI/TGFB2/AKT1/SDS/ALDOA/GAPDH/PFKP/PGM2/PKM/PDGFRB/SHMT2/ENO1/LDHB/TGFB3/HIF1A/PSAT1/SLC2A1/TGFB1/HK3/ME1/ENO2
WP_EGF_EGFR_SIGNALING_PATHWAY	WP_EGF_EGFR_SIGNALING_PATHWAY	WP_EGF_EGFR_SIGNALING_PATHWAY	157	0.332782	1.2455	0.0708783	0.264201	0.210565	3380	tags=32%, list=21%, signal=25%	VAV3/JUN/REPS2/INPP5D/RPS6KA3/PTK6/PIK3R1/NCK2/PLCG1/FOXO4/PLCE1/NEDD4/NCOA3/ABL1/GAB1/LIMK2/PIK3C2B/EGFR/EPN1/SH3KBP1/PDPK1/SRC/SOS2/PTK2B/ARHGEF1/PRKCD/ITCH/MAP2K5/VAV2/PRKCZ/EPS8/PAK1/PRKCA/E2F1/MAP3K2/PLD1/SOS1/STAMBP/ERBB2/ATXN2/USP8/IQGAP1/CBLC/RICTOR/JUND/MEF2D/RASA1/RALGDS/SP1/GAB2
WP_MITOCHONDRIAL_FATTY_ACID_OXIDATION_DISORDERS	WP_MITOCHONDRIAL_FATTY_ACID_OXIDATION_DISORDERS	WP_MITOCHONDRIAL_FATTY_ACID_OXIDATION_DISORDERS	19	0.569792	1.43077	0.0709091	0.264201	0.210565	3049	tags=63%, list=19%, signal=51%	ACSF2/SLC22A5/ACADS/HADH/SLC25A20/PECR/EHHADH/HADHA/SCP2/ACSL3/CPT1A/ACADM
WP_BLOOD_CLOTTING_CASCADE	WP_BLOOD_CLOTTING_CASCADE	WP_BLOOD_CLOTTING_CASCADE	22	-0.5264	-1.41744	0.0711009	0.264584	0.21087	1715	tags=32%, list=11%, signal=28%	F12/VWF/F3/F5/SERPINE1/PLAU/SERPINB2
WP_SEROTONIN_AND_ANXIETY	WP_SEROTONIN_AND_ANXIETY	WP_SEROTONIN_AND_ANXIETY	16	-0.558543	-1.41886	0.0712695	0.264668	0.210937	3640	tags=38%, list=23%, signal=29%	HTR2A/PPP3CA/PRKCB/FOS/ARC/PLEK
KEGG_MEDICUS_VARIANT_MUTATION_CAUSED_ABBERANT_ATXN2_3_TO_MGLUR5_CA2_APOPTOTIC_PATHWAY	KEGG_MEDICUS_VARIANT_MUTATION_CAUSED_ABBERANT_ATXN2_3_TO_MGLUR5_CA2_APOPTOTIC_PATHWAY	KEGG_MEDICUS_VARIANT_MUTATION_CAUSED_ABBERANT_ATXN2_3_TO_MGLUR5_CA2_APOPTOTIC_PATHWAY	18	0.571447	1.43259	0.0713012	0.264668	0.210937	1130	tags=17%, list=7%, signal=16%	PLCB4/PLCB1/CYCS
KEGG_TERPENOID_BACKBONE_BIOSYNTHESIS	KEGG_TERPENOID_BACKBONE_BIOSYNTHESIS	KEGG_TERPENOID_BACKBONE_BIOSYNTHESIS	15	0.602191	1.42709	0.0714286	0.264811	0.211051	4465	tags=53%, list=28%, signal=39%	HMGCS2/HMGCR/IDI1/PDSS1/MVD/MVK/ACAT1/ACAT2
KEGG_MEDICUS_ENV_FACTOR_NICOTINE_NNK_TO_PI3K_SIGNALING_PATHWAY	KEGG_MEDICUS_ENV_FACTOR_NICOTINE_NNK_TO_PI3K_SIGNALING_PATHWAY	KEGG_MEDICUS_ENV_FACTOR_NICOTINE_NNK_TO_PI3K_SIGNALING_PATHWAY	11	-0.634378	-1.46589	0.0720524	0.266791	0.212629	2658	tags=55%, list=16%, signal=46%	GNAI1/AKT1/PIK3CD/GNAI3/AKT3/GNAI2
REACTOME_REGULATION_OF_FZD_BY_UBIQUITINATION	REACTOME_REGULATION_OF_FZD_BY_UBIQUITINATION	REACTOME_REGULATION_OF_FZD_BY_UBIQUITINATION	19	0.565789	1.42072	0.0727273	0.268955	0.214354	1022	tags=21%, list=6%, signal=20%	RNF43/LGR5/ZNRF3/FZD5
REACTOME_ION_TRANSPORT_BY_P_TYPE_ATPASES	REACTOME_ION_TRANSPORT_BY_P_TYPE_ATPASES	REACTOME_ION_TRANSPORT_BY_P_TYPE_ATPASES	54	0.431209	1.35155	0.0732113	0.270016	0.215199	1414	tags=19%, list=9%, signal=17%	ATP10B/ATP9A/FXYD3/ATP1A1/ATP2C2/SRI/ATP8B1/ATP2A3/ATP1B1/ATP7B
REACTOME_ORGANIC_CATION_ANION_ZWITTERION_TRANSPORT	REACTOME_ORGANIC_CATION_ANION_ZWITTERION_TRANSPORT	REACTOME_ORGANIC_CATION_ANION_ZWITTERION_TRANSPORT	13	0.627817	1.44057	0.0732601	0.270016	0.215199	3144	tags=46%, list=19%, signal=37%	SLC22A3/SLC22A11/SLC22A5/SLC22A18/SLC22A12/SLC22A4
REACTOME_GAP_FILLING_DNA_REPAIR_SYNTHESIS_AND_LIGATION_IN_GG_NER	REACTOME_GAP_FILLING_DNA_REPAIR_SYNTHESIS_AND_LIGATION_IN_GG_NER	REACTOME_GAP_FILLING_DNA_REPAIR_SYNTHESIS_AND_LIGATION_IN_GG_NER	25	-0.490279	-1.35677	0.0732861	0.270016	0.215199	4730	tags=64%, list=29%, signal=45%	RPA3/POLE4/LIG1/PCNA/POLE3/UBB/POLD2/RFC1/POLD1/UBA52/RFC5/RFC4/RFC2/RPA1/RPA2/POLE2
WP_HIPPO_YAP_SIGNALING	WP_HIPPO_YAP_SIGNALING	WP_HIPPO_YAP_SIGNALING	22	-0.522126	-1.40593	0.0733945	0.270081	0.215251	1692	tags=32%, list=10%, signal=29%	MAP4K4/STK3/LATS2/TEAD4/SAV1/WWTR1/CXCL10
PID_HDAC_CLASSIII_PATHWAY	PID_HDAC_CLASSIII_PATHWAY	PID_HDAC_CLASSIII_PATHWAY	24	0.531703	1.41109	0.0739437	0.271695	0.216538	1973	tags=29%, list=12%, signal=26%	ACSS2/FOXO3/ACSS1/PPARGC1A/FOXO4/SIRT2/CREBBP
KEGG_ERBB_SIGNALING_PATHWAY	KEGG_ERBB_SIGNALING_PATHWAY	KEGG_ERBB_SIGNALING_PATHWAY	86	0.385651	1.31307	0.0740157	0.271695	0.216538	3148	tags=30%, list=19%, signal=24%	EREG/JUN/AREG/PIK3R1/NCK2/PLCG1/ERBB3/ABL1/GAB1/EGFR/SHC3/SRC/SOS2/CDKN1B/HBEGF/PAK1/PRKCA/SHC2/PIK3CB/MAPK3/SOS1/ERBB2/CBLC/MAP2K7/MYC/PAK4
WP_CONGENITAL_GENERALIZED_LIPODYSTROPHY	WP_CONGENITAL_GENERALIZED_LIPODYSTROPHY	WP_CONGENITAL_GENERALIZED_LIPODYSTROPHY	15	-0.567311	-1.41805	0.0745614	0.273265	0.217789	623	tags=27%, list=4%, signal=26%	HIF1A/IRS1/CAV1/FYN
KEGG_MEDICUS_REFERENCE_AVP_V2R_PKA_SIGNALING_PATHWAY	KEGG_MEDICUS_REFERENCE_AVP_V2R_PKA_SIGNALING_PATHWAY	KEGG_MEDICUS_REFERENCE_AVP_V2R_PKA_SIGNALING_PATHWAY	10	0.671034	1.43761	0.0746269	0.273265	0.217789	4575	tags=60%, list=28%, signal=43%	PRKACB/ADCY6/ADCY3/GNAS/PRKACG/ADCY9
KEGG_STEROID_HORMONE_BIOSYNTHESIS	KEGG_STEROID_HORMONE_BIOSYNTHESIS	KEGG_STEROID_HORMONE_BIOSYNTHESIS	41	0.459249	1.35105	0.0747331	0.273317	0.217831	744	tags=15%, list=5%, signal=14%	HSD11B2/UGT2B17/UGT2A3/CYP3A5/UGT2B15/AKR1C3
WP_AMPLIFICATION_AND_EXPANSION_OF_ONCOGENIC_PATHWAYS_AS_METASTATIC_TRAITS	WP_AMPLIFICATION_AND_EXPANSION_OF_ONCOGENIC_PATHWAYS_AS_METASTATIC_TRAITS	WP_AMPLIFICATION_AND_EXPANSION_OF_ONCOGENIC_PATHWAYS_AS_METASTATIC_TRAITS	17	-0.54678	-1.41119	0.0752212	0.274765	0.218984	1056	tags=35%, list=7%, signal=33%	WNT2/VCAM1/CYTIP/CXCR4/TNC/POSTN
REACTOME_INFLAMMASOMES	REACTOME_INFLAMMASOMES	REACTOME_INFLAMMASOMES	21	-0.52593	-1.40161	0.0755149	0.2755	0.21957	2190	tags=38%, list=14%, signal=33%	NLRC4/NFKB2/PSTPIP1/NLRP3/HMOX1/PANX1/P2RX7/AIM2
REACTOME_THE_NLRP3_INFLAMMASOME	REACTOME_THE_NLRP3_INFLAMMASOME	REACTOME_THE_NLRP3_INFLAMMASOME	16	-0.553146	-1.40515	0.0757238	0.275924	0.219908	1541	tags=50%, list=10%, signal=45%	MEFV/HSP90AB1/NFKB2/PSTPIP1/NLRP3/HMOX1/PANX1/P2RX7
KEGG_MEDICUS_REFERENCE_ISOLEUCINE_DEGRADATION	KEGG_MEDICUS_REFERENCE_ISOLEUCINE_DEGRADATION	KEGG_MEDICUS_REFERENCE_ISOLEUCINE_DEGRADATION	10	0.669599	1.43454	0.0764925	0.278384	0.221869	3049	tags=70%, list=19%, signal=57%	ACADS/HADH/ACAA2/HADHA/ACADSB/ACAA1/ACADM
WP_15Q13_3_COPY_NUMBER_VARIATION_SYNDROME	WP_15Q13_3_COPY_NUMBER_VARIATION_SYNDROME	WP_15Q13_3_COPY_NUMBER_VARIATION_SYNDROME	13	-0.604479	-1.44518	0.0767544	0.278996	0.222356	717	tags=23%, list=4%, signal=22%	SERPINH1/CCL5/FYN
KEGG_GLYCOSAMINOGLYCAN_DEGRADATION	KEGG_GLYCOSAMINOGLYCAN_DEGRADATION	KEGG_GLYCOSAMINOGLYCAN_DEGRADATION	20	-0.533787	-1.4102	0.0769231	0.279268	0.222573	1149	tags=30%, list=7%, signal=28%	ARSB/HS3ST3B1/GNS/HYAL1/HPSE/HS3ST3A1
WP_KLEEFSTRA_SYNDROME	WP_KLEEFSTRA_SYNDROME	WP_KLEEFSTRA_SYNDROME	27	0.503113	1.37289	0.077193	0.279907	0.223082	5967	tags=67%, list=37%, signal=42%	ASXL1/NCOA6/KMT2C/RXRA/SMARCC2/KDM6A/ARID1B/PAGR1/SMARCD2/SMARCC1/ARID1A/SMARCA2/NR1I3/BAP1/SMARCB1/SMARCA4/EHMT1/MBD5
REACTOME_N_GLYCAN_ANTENNAE_ELONGATION_IN_THE_MEDIAL_TRANS_GOLGI	REACTOME_N_GLYCAN_ANTENNAE_ELONGATION_IN_THE_MEDIAL_TRANS_GOLGI	REACTOME_N_GLYCAN_ANTENNAE_ELONGATION_IN_THE_MEDIAL_TRANS_GOLGI	24	0.527502	1.39994	0.0774648	0.280452	0.223516	2777	tags=38%, list=17%, signal=31%	FUT3/ST6GAL1/MGAT4B/MGAT5/FUCA1/MAN2A2/MGAT4A/MAN2A1/B4GALT5
REACTOME_TP53_REGULATES_METABOLIC_GENES	REACTOME_TP53_REGULATES_METABOLIC_GENES	REACTOME_TP53_REGULATES_METABOLIC_GENES	83	0.386201	1.30766	0.0775316	0.280452	0.223516	3934	tags=34%, list=24%, signal=26%	SESN1/PRDX5/GPX2/PRKAB1/YWHAB/CYCS/COX19/TNRC6A/COX5A/TNRC6B/GLS/TSC2/LRPPRC/SESN2/COX5B/RRAGB/COX20/SESN3/LAMTOR3/COX4I1/SLC38A9/PRKAA1/COX6A1/TSC1/COX7B/COX6C/COX14/RRAGA
REACTOME_ACTIVATION_OF_AMPK_DOWNSTREAM_OF_NMDARS	REACTOME_ACTIVATION_OF_AMPK_DOWNSTREAM_OF_NMDARS	REACTOME_ACTIVATION_OF_AMPK_DOWNSTREAM_OF_NMDARS	24	-0.49359	-1.36928	0.078341	0.282827	0.22541	2082	tags=33%, list=13%, signal=29%	TUBB3/TUBA4A/TUBA1C/TUBB2B/TUBA1B/TUBA1A/TUBB2A/TUBB6
WP_HEPATITIS_B_INFECTION	WP_HEPATITIS_B_INFECTION	WP_HEPATITIS_B_INFECTION	146	-0.323601	-1.27138	0.0783784	0.282827	0.22541	2500	tags=23%, list=15%, signal=19%	TRAF3/PIK3R3/SMAD2/FASLG/JAK3/MAP2K4/FOS/TGFB2/MAPK11/TNF/AKT1/PIK3CD/STAT2/DDB2/TGFBR1/AKT3/EGR3/IFIH1/HRAS/BIRC5/NFATC1/IRF7/JAK2/FAS/TGFB3/EGR2/CREB3L1/TGFB1/TLR2/STAT1/MMP9/IL6/CXCL8
PID_ERBB_NETWORK_PATHWAY	PID_ERBB_NETWORK_PATHWAY	PID_ERBB_NETWORK_PATHWAY	15	0.590747	1.39997	0.0787546	0.283841	0.226217	2647	tags=40%, list=16%, signal=33%	EREG/AREG/ERBB3/EGFR/HBEGF/ERBB2
KEGG_MEDICUS_VARIANT_LRP6_OVEREXPRESSION_TO_WNT_SIGNALING_PATHWAY	KEGG_MEDICUS_VARIANT_LRP6_OVEREXPRESSION_TO_WNT_SIGNALING_PATHWAY	KEGG_MEDICUS_VARIANT_LRP6_OVEREXPRESSION_TO_WNT_SIGNALING_PATHWAY	42	0.448612	1.32773	0.0789474	0.284082	0.22641	2371	tags=31%, list=15%, signal=26%	AXIN2/TCF7/AXIN1/WNT5B/FZD5/FRAT2/LRP6/FRAT1/WNT4/FZD9/TCF7L2/FZD10/WNT2B
REACTOME_AMYLOID_FIBER_FORMATION	REACTOME_AMYLOID_FIBER_FORMATION	REACTOME_AMYLOID_FIBER_FORMATION	49	-0.406027	-1.33358	0.0790123	0.284082	0.22641	841	tags=12%, list=5%, signal=12%	MFGE8/UBE2L6/SEMG1/CALB1/APOE/LYZ
REACTOME_RESPIRATORY_ELECTRON_TRANSPORT_ATP_SYNTHESIS_BY_CHEMIOSMOTIC_COUPLING_AND_HEAT_PRODUCTION_BY_UNCOUPLING_PROTEINS	REACTOME_RESPIRATORY_ELECTRON_TRANSPORT_ATP_SYNTHESIS_BY_CHEMIOSMOTIC_COUPLING_AND_HEAT_PRODUCTION_BY_UNCOUPLING_PROTEINS	REACTOME_RESPIRATORY_ELECTRON_TRANSPORT_ATP_SYNTHESIS_BY_CHEMIOSMOTIC_COUPLING_AND_HEAT_PRODUCTION_BY_UNCOUPLING_PROTEINS	94	0.37955	1.31683	0.0791599	0.284161	0.226473	5826	tags=48%, list=36%, signal=31%	SLC25A27/CYCS/COX19/NUBPL/COX5A/UQCRC2/LRPPRC/ETFDH/COX5B/UQCR11/COX20/COX4I1/NDUFS1/SDHD/TMEM186/COX6A1/NDUFA5/UQCRQ/COX7B/NDUFA7/COX6C/COX14/NDUFB11/NDUFB1/NDUFB5/NDUFB4/NDUFA1/UCP3/NDUFAF4/NDUFB3/NDUFV1/NDUFA10/NDUFC1/NDUFB2/NDUFA2/UQCRB/NDUFB8/SURF1/ETFA/COX18/NDUFA8/SLC25A14/NDUFAF5/NDUFA3/COX6B1
REACTOME_SIGNALING_BY_EGFR_IN_CANCER	REACTOME_SIGNALING_BY_EGFR_IN_CANCER	REACTOME_SIGNALING_BY_EGFR_IN_CANCER	24	0.523852	1.39025	0.0792254	0.284161	0.226473	2556	tags=33%, list=16%, signal=28%	EREG/AREG/PIK3R1/PLCG1/GAB1/EGFR/HBEGF/SOS1
REACTOME_TRANSCRIPTION_COUPLED_NUCLEOTIDE_EXCISION_REPAIR_TC_NER	REACTOME_TRANSCRIPTION_COUPLED_NUCLEOTIDE_EXCISION_REPAIR_TC_NER	REACTOME_TRANSCRIPTION_COUPLED_NUCLEOTIDE_EXCISION_REPAIR_TC_NER	77	-0.351354	-1.25774	0.0795756	0.285074	0.2272	4894	tags=52%, list=30%, signal=36%	GTF2H1/ERCC2/COPS6/PRPF19/RPA3/GPS1/POLE4/ERCC4/XPA/LIG1/GTF2H5/PCNA/GTF2H4/ERCC1/COPS2/ERCC8/POLE3/UBB/POLD2/COPS4/RBX1/RFC1/HMGN1/POLD1/UBA52/COPS7A/RFC5/COPS8/RFC4/POLR2E/RFC2/POLR2A/POLR2I/POLR2G/RPA1/RPA2/POLE2/POLR2L/MNAT1/COPS3
REACTOME_NUCLEOTIDE_EXCISION_REPAIR	REACTOME_NUCLEOTIDE_EXCISION_REPAIR	REACTOME_NUCLEOTIDE_EXCISION_REPAIR	108	-0.333827	-1.26064	0.0797872	0.285489	0.227531	4894	tags=47%, list=30%, signal=33%	GTF2H1/ERCC2/COPS6/PRPF19/RPA3/TFPT/GPS1/YY1/POLE4/ERCC4/XPA/LIG1/GTF2H5/PCNA/GTF2H4/ERCC1/COPS2/ERCC8/CETN2/POLE3/UBB/POLD2/COPS4/RBX1/RFC1/HMGN1/POLD1/UBA52/COPS7A/RFC5/ACTB/RUVBL1/COPS8/INO80C/RFC4/POLR2E/RFC2/POLR2A/POLR2I/POLR2G/RPA1/DDB2/RPA2/PARP1/SUMO3/POLE2/POLR2L/PARP2/MNAT1/COPS3/PIAS3
REACTOME_GPVI_MEDIATED_ACTIVATION_CASCADE	REACTOME_GPVI_MEDIATED_ACTIVATION_CASCADE	REACTOME_GPVI_MEDIATED_ACTIVATION_CASCADE	34	-0.450466	-1.35565	0.0800915	0.285922	0.227876	1334	tags=29%, list=8%, signal=27%	PIK3R5/RAC2/LYN/LCP2/PDPN/COL1A2/FYN/COL1A1/LCK/FCER1G
PID_ANTHRAX_PATHWAY	PID_ANTHRAX_PATHWAY	PID_ANTHRAX_PATHWAY	16	-0.547877	-1.39177	0.0801782	0.285922	0.227876	2169	tags=44%, list=13%, signal=38%	MAP2K4/TNF/IL18/ANTXR2/VCAM1/ANTXR1/IL1B
WP_ENDOMETRIAL_CANCER	WP_ENDOMETRIAL_CANCER	WP_ENDOMETRIAL_CANCER	63	0.403623	1.30889	0.0801964	0.285922	0.227876	2647	tags=25%, list=16%, signal=21%	AXIN2/FGFR3/TCF7/FOXO3/CDH1/PIK3R1/AXIN1/CTNNA2/EGFR/PDPK1/SOS2/TCF7L2/PIK3CB/MAPK3/SOS1/ERBB2
WP_CORTICOTROPIN_RELEASING_HORMONE_SIGNALING_PATHWAY	WP_CORTICOTROPIN_RELEASING_HORMONE_SIGNALING_PATHWAY	WP_CORTICOTROPIN_RELEASING_HORMONE_SIGNALING_PATHWAY	89	-0.348008	-1.27331	0.080429	0.286408	0.228263	2784	tags=24%, list=17%, signal=20%	GNB1/PRKCB/GNAI1/GNAZ/PLCG2/FOS/TCF4/AKT1/PARP1/MAP3K5/KRT14/IL18/GNB5/NR4A2/HSP90AA1/GNAI2/GJA1/TGFB1/FOSL1/TFAP2A/CXCL8
PID_MET_PATHWAY	PID_MET_PATHWAY	PID_MET_PATHWAY	79	0.384619	1.2927	0.0809524	0.287819	0.229388	4664	tags=41%, list=29%, signal=29%	MUC20/JUN/CDH1/PIK3R1/NCK2/PLCG1/GAB1/SH3KBP1/PDPK1/SRC/RIN2/PRKCZ/WASL/PAK1/PTPN1/DEPTOR/MAPK3/F2RL2/SOS1/PAK4/RANBP10/MET/GAB2/CTNNA1/RAPGEF1/CTNNB1/HGS/CRKL/RAF1/RAB5A/PTPRJ/RAC1
REACTOME_TAK1_DEPENDENT_IKK_AND_NF_KAPPA_B_ACTIVATION	REACTOME_TAK1_DEPENDENT_IKK_AND_NF_KAPPA_B_ACTIVATION	REACTOME_TAK1_DEPENDENT_IKK_AND_NF_KAPPA_B_ACTIVATION	42	-0.425256	-1.35004	0.0810185	0.287819	0.229388	2051	tags=33%, list=13%, signal=29%	UBB/NFKBIA/CHUK/UBA52/NKIRAS1/S100B/NFKB2/RIPK2/USP14/TIFA/NLRC5/S100A12/USP18/IKBIP
WP_PHYSIOLOGICAL_AND_PATHOLOGICAL_HYPERTROPHY_OF_THE_HEART	WP_PHYSIOLOGICAL_AND_PATHOLOGICAL_HYPERTROPHY_OF_THE_HEART	WP_PHYSIOLOGICAL_AND_PATHOLOGICAL_HYPERTROPHY_OF_THE_HEART	23	0.528078	1.39327	0.0818505	0.29011	0.231214	432	tags=17%, list=3%, signal=17%	AGT/JUN/MYEF2/EDN1
WP_INVOLVEMENT_OF_SECRETASE_IN_NEURODEGENERATIVE_DISEASES	WP_INVOLVEMENT_OF_SECRETASE_IN_NEURODEGENERATIVE_DISEASES	WP_INVOLVEMENT_OF_SECRETASE_IN_NEURODEGENERATIVE_DISEASES	17	-0.541714	-1.39812	0.0818584	0.29011	0.231214	1853	tags=29%, list=11%, signal=26%	AKT1/AKT3/LGMN/MAOB/STAT1
WP_LEPTIN_AND_ADIPONECTIN	WP_LEPTIN_AND_ADIPONECTIN	WP_LEPTIN_AND_ADIPONECTIN	10	0.665219	1.42516	0.0820896	0.290414	0.231456	3083	tags=40%, list=19%, signal=32%	PRKAB1/ADIPOR2/CPT1A/PRKAA1
REACTOME_CD28_CO_STIMULATION	REACTOME_CD28_CO_STIMULATION	REACTOME_CD28_CO_STIMULATION	33	-0.45781	-1.36505	0.0821918	0.290414	0.231456	2511	tags=33%, list=16%, signal=28%	CD28/PIK3R3/THEM4/AKT1/CD80/AKT3/MAP3K8/LYN/CD86/FYN/LCK
REACTOME_MITOCHONDRIAL_BIOGENESIS	REACTOME_MITOCHONDRIAL_BIOGENESIS	REACTOME_MITOCHONDRIAL_BIOGENESIS	72	0.390352	1.28835	0.0822368	0.290414	0.231456	3622	tags=29%, list=22%, signal=23%	ACSS2/PPARGC1A/PRKAB1/MTERF1/PPARA/ESRRA/NCOA6/CYCS/CHD9/PPARGC1B/SIRT5/APOOL/CREBBP/RXRA/NCOA2/CRTC1/MEF2D/HELZ2/SIRT3/IDH2/CRTC3
REACTOME_METABOLISM_OF_CARBOHYDRATES	REACTOME_METABOLISM_OF_CARBOHYDRATES	REACTOME_METABOLISM_OF_CARBOHYDRATES	286	-0.274561	-1.15824	0.0823864	0.290597	0.231602	2952	tags=29%, list=18%, signal=24%	NUP50/UBA52/SLC25A11/CHST14/SLC9A1/PGD/CSPG5/CD44/HSPG2/NUP35/FUT1/HK1/MANBA/TPI1/NUP155/LYVE1/CSGALNACT1/PGK1/GBE1/B3GALT6/PRELP/PGAM2/GPI/ARSB/SEC13/NUP210/ST3GAL1/CHST2/PPP1R3C/G6PD/CHST1/HS3ST1/HMMR/FMOD/PFKFB4/GAA/HS3ST2/PAPSS1/CSPG4/GPC1/ST3GAL6/ALDOA/NDC1/GAPDH/PFKP/PGM2/CHPF/HS3ST3B1/FUT11/GNS/PGAM1/PKM/CHST7/CHST6/BPGM/PRPS1/CHSY3/ENO1/DSE/HS6ST2/CHSY1/CHST3/GPC6/HYAL1/PFKFB3/UST/CSGALNA…
REACTOME_SYNTHESIS_OF_PROSTAGLANDINS_PG_AND_THROMBOXANES_TX	REACTOME_SYNTHESIS_OF_PROSTAGLANDINS_PG_AND_THROMBOXANES_TX	REACTOME_SYNTHESIS_OF_PROSTAGLANDINS_PG_AND_THROMBOXANES_TX	14	-0.582565	-1.42672	0.0835165	0.294235	0.234502	3974	tags=64%, list=25%, signal=49%	PTGDS/PTGES3/PTGS1/TBXAS1/CBR1/PTGES/PTGIS/HPGD/PTGS2
WP_PRIMARY_FOCAL_SEGMENTAL_GLOMERULOSCLEROSIS_FSGS	WP_PRIMARY_FOCAL_SEGMENTAL_GLOMERULOSCLEROSIS_FSGS	WP_PRIMARY_FOCAL_SEGMENTAL_GLOMERULOSCLEROSIS_FSGS	71	-0.362522	-1.2893	0.0839695	0.295481	0.235495	2226	tags=27%, list=14%, signal=23%	VCL/CR1/CDH2/MME/AKT1/CDKN1C/CD80/ITGAV/ITGA3/LAMA5/DNM1/LAMB2/VIM/TGFB1/PLAUR/DKK1/PODXL/CTSL/FYN
REACTOME_PERK_REGULATES_GENE_EXPRESSION	REACTOME_PERK_REGULATES_GENE_EXPRESSION	REACTOME_PERK_REGULATES_GENE_EXPRESSION	32	-0.456104	-1.35136	0.0842825	0.296232	0.236094	2140	tags=34%, list=13%, signal=30%	EXOSC2/EXOSC8/NFYB/EXOSC3/IGFBP1/EXOSC4/HSPA5/EXOSC9/EIF2S1/CCL2/CXCL8
REACTOME_SARS_COV_2_INFECTION	REACTOME_SARS_COV_2_INFECTION	REACTOME_SARS_COV_2_INFECTION	277	-0.2764	-1.16534	0.0852273	0.2992	0.238459	3540	tags=30%, list=22%, signal=24%	RPS16/NUP133/NUP205/VPS18/IFNAR2/UBB/GOLGA7/HLA-B/HSP90AB1/CHUK/PARP8/SNRPG/RPS8/NUP62/TLR7/HLA-G/NUP160/NUP50/UBA52/DDX20/HSPG2/NUP35/HLA-E/HLA-C/RPS18/RPS12/DDOST/NUP155/TRAF3/FAU/GALNT1/SNRPD2/MGAT1/ANO6/SEC24A/SEC13/PRMT1/NUP210/PARP14/RPS5/ST3GAL1/MGAT2/HLA-F/RPN1/AKT1/STAT2/YWHAE/SNRPF/TUSC3/STT3A/GEMIN4/NLRP3/SFN/GPC1/AKT3/NDC1/IFIH1/DAD1/KPNA2/RIPK2/RPS4Y1/ST6GALNAC4/HSP90AA1/GEMIN2/IRF7/…
BIOCARTA_NPC_PATHWAY	BIOCARTA_NPC_PATHWAY	BIOCARTA_NPC_PATHWAY	10	-0.633534	-1.42856	0.0858369	0.299672	0.238835	3907	tags=70%, list=24%, signal=53%	KPNB1/NUP62/RANGAP1/NUP210/RCC1/RAN/KPNA2
KEGG_MEDICUS_REFERENCE_CD80_CD86_CD28_PI3K_SIGNALING_PATHWAY	KEGG_MEDICUS_REFERENCE_CD80_CD86_CD28_PI3K_SIGNALING_PATHWAY	KEGG_MEDICUS_REFERENCE_CD80_CD86_CD28_PI3K_SIGNALING_PATHWAY	10	-0.633268	-1.42796	0.0858369	0.299672	0.238835	2511	tags=60%, list=16%, signal=51%	CD28/AKT1/PIK3CD/CD80/AKT3/CD86
WP_ALZHEIMER_39_S_DISEASE	WP_ALZHEIMER_39_S_DISEASE	WP_ALZHEIMER_39_S_DISEASE	246	-0.281596	-1.17983	0.0858726	0.299672	0.238835	2396	tags=22%, list=15%, signal=19%	PIK3R3/NRBF2/NOS2/PPP3R1/WNT10A/PSMD8/FZD1/TUBB3/PSMB3/DKK2/MME/TNF/TUBA4A/PSMD9/PPIF/PSMC4/AKT1/PIK3CD/PSMD2/ATG101/GRIN2D/PSMC1/TUBA1C/PSMC3/MAP3K5/TUBB/AKT3/PSMB5/WNT5A/GAPDH/EIF2S1/TUBB2B/HRAS/KLC1/TUBA1B/WNT2/PSMC6/TUBA1A/FAS/PSMB6/KLC2/FZD2/IRS1/TUBB2A/NOX4/SLC25A6/CYBB/DKK1/TUBB6/SFRP4/IL1B/APOE/IL6/PTGS2
WP_ALZHEIMER_39_S_DISEASE_AND_MIRNA_EFFECTS	WP_ALZHEIMER_39_S_DISEASE_AND_MIRNA_EFFECTS	WP_ALZHEIMER_39_S_DISEASE_AND_MIRNA_EFFECTS	246	-0.281596	-1.17983	0.0858726	0.299672	0.238835	2396	tags=22%, list=15%, signal=19%	PIK3R3/NRBF2/NOS2/PPP3R1/WNT10A/PSMD8/FZD1/TUBB3/PSMB3/DKK2/MME/TNF/TUBA4A/PSMD9/PPIF/PSMC4/AKT1/PIK3CD/PSMD2/ATG101/GRIN2D/PSMC1/TUBA1C/PSMC3/MAP3K5/TUBB/AKT3/PSMB5/WNT5A/GAPDH/EIF2S1/TUBB2B/HRAS/KLC1/TUBA1B/WNT2/PSMC6/TUBA1A/FAS/PSMB6/KLC2/FZD2/IRS1/TUBB2A/NOX4/SLC25A6/CYBB/DKK1/TUBB6/SFRP4/IL1B/APOE/IL6/PTGS2
WP_HEDGEHOG_SIGNALING_PATHWAY_WP47	WP_HEDGEHOG_SIGNALING_PATHWAY_WP47	WP_HEDGEHOG_SIGNALING_PATHWAY_WP47	14	0.600043	1.40201	0.0859232	0.299672	0.238835	2058	tags=43%, list=13%, signal=37%	IHH/SHH/PTCH1/KIF7/STK36/SMO
KEGG_P53_SIGNALING_PATHWAY	KEGG_P53_SIGNALING_PATHWAY	KEGG_P53_SIGNALING_PATHWAY	65	-0.371775	-1.28312	0.0860049	0.299672	0.238835	2991	tags=29%, list=19%, signal=24%	CDK1/CCNE2/MDM2/CHEK1/RRM2B/CCND1/THBS1/GADD45B/DDB2/RRM2/CD82/SFN/IGFBP3/CDKN2A/FAS/CCNB1/PMAIP1/SERPINE1/SERPINB5
WP_NEURODEGENERATION_WITH_BRAIN_IRON_ACCUMULATION_NBIA_SUBTYPES_PATHWAY	WP_NEURODEGENERATION_WITH_BRAIN_IRON_ACCUMULATION_NBIA_SUBTYPES_PATHWAY	WP_NEURODEGENERATION_WITH_BRAIN_IRON_ACCUMULATION_NBIA_SUBTYPES_PATHWAY	44	0.441338	1.33232	0.0862069	0.299672	0.238835	5496	tags=48%, list=34%, signal=32%	MAP1LC3A/WIPI1/BECN1/STK11/PLA2G6/FA2H/TSC2/RB1CC1/GTPBP2/DEPTOR/SCP2/PRKAA1/TSC1/C19orf12/WDR45/WIPI2/RHEB/MECP2/ATG2A/ATG16L1/ULK1
KEGG_GLYCOSYLPHOSPHATIDYLINOSITOL_GPI_ANCHOR_BIOSYNTHESIS	KEGG_GLYCOSYLPHOSPHATIDYLINOSITOL_GPI_ANCHOR_BIOSYNTHESIS	KEGG_GLYCOSYLPHOSPHATIDYLINOSITOL_GPI_ANCHOR_BIOSYNTHESIS	24	0.517817	1.37424	0.0862676	0.299672	0.238835	1597	tags=17%, list=10%, signal=15%	PIGZ/PIGU/PIGT/PGAP1
KEGG_SELENOAMINO_ACID_METABOLISM	KEGG_SELENOAMINO_ACID_METABOLISM	KEGG_SELENOAMINO_ACID_METABOLISM	24	0.517238	1.3727	0.0862676	0.299672	0.238835	3461	tags=42%, list=21%, signal=33%	GGT7/GGT6/SEPHS2/MAT1A/PAPSS2/GGT1/HEMK1/LCMT1/METTL2B/AHCY
BIOCARTA_BARRESTIN_SRC_PATHWAY	BIOCARTA_BARRESTIN_SRC_PATHWAY	BIOCARTA_BARRESTIN_SRC_PATHWAY	16	-0.542589	-1.37834	0.0868597	0.301026	0.239914	1213	tags=25%, list=8%, signal=23%	HRAS/DNM1/FGR/HCK
REACTOME_ACTIVATION_OF_IRF3_IRF7_MEDIATED_BY_TBK1_IKBKE	REACTOME_ACTIVATION_OF_IRF3_IRF7_MEDIATED_BY_TBK1_IKBKE	REACTOME_ACTIVATION_OF_IRF3_IRF7_MEDIATED_BY_TBK1_IKBKE	16	-0.539116	-1.36951	0.0868597	0.301026	0.239914	889	tags=50%, list=6%, signal=47%	PTPN11/TANK/UBB/UBA52/TRAF3/IRF7/CD14/LY96
REACTOME_SIGNALING_BY_EGFR	REACTOME_SIGNALING_BY_EGFR	REACTOME_SIGNALING_BY_EGFR	49	0.436469	1.35003	0.0871022	0.301351	0.240173	1538	tags=22%, list=10%, signal=20%	EREG/AREG/PIK3R1/PLCG1/PTPRK/PTPN3/GAB1/EGFR/EPN1/SH3KBP1/SRC
BIOCARTA_EICOSANOID_PATHWAY	BIOCARTA_EICOSANOID_PATHWAY	BIOCARTA_EICOSANOID_PATHWAY	22	-0.512604	-1.38029	0.087156	0.301351	0.240173	1590	tags=36%, list=10%, signal=33%	PTGFR/PTGES/PTGIS/PTGER2/ALOX5/ALOX5AP/PLA2G4A/PTGS2
WP_GASTRIN_SIGNALING_PATHWAY	WP_GASTRIN_SIGNALING_PATHWAY	WP_GASTRIN_SIGNALING_PATHWAY	113	-0.32209	-1.22903	0.088	0.303916	0.242218	2498	tags=22%, list=15%, signal=19%	ITGB1/PIK3R3/RPS6KB1/PRKCH/FOS/CCND1/ANXA2/TCF4/AKT1/EIF4EBP1/PRKD1/HRAS/BIRC5/CDKN2A/JAK2/RHOD/MMP7/BIRC3/IRS1/FYN/SERPINE1/SERPINB2/PTGS2/TFF2/CXCL8
REACTOME_TRANSCRIPTIONAL_REGULATION_BY_THE_AP_2_TFAP2_FAMILY_OF_TRANSCRIPTION_FACTORS	REACTOME_TRANSCRIPTIONAL_REGULATION_BY_THE_AP_2_TFAP2_FAMILY_OF_TRANSCRIPTION_FACTORS	REACTOME_TRANSCRIPTIONAL_REGULATION_BY_THE_AP_2_TFAP2_FAMILY_OF_TRANSCRIPTION_FACTORS	35	-0.439221	-1.31989	0.0881671	0.304024	0.242303	2406	tags=31%, list=15%, signal=27%	CITED4/ATAD2/CITED1/YEATS4/CITED2/NPM1/KCTD15/KCTD1/TFAP2C/TFAP2A/APOE
REACTOME_INHIBITION_OF_THE_PROTEOLYTIC_ACTIVITY_OF_APC_C_REQUIRED_FOR_THE_ONSET_OF_ANAPHASE_BY_MITOTIC_SPINDLE_CHECKPOINT_COMPONENTS	REACTOME_INHIBITION_OF_THE_PROTEOLYTIC_ACTIVITY_OF_APC_C_REQUIRED_FOR_THE_ONSET_OF_ANAPHASE_BY_MITOTIC_SPINDLE_CHECKPOINT_COMPONENTS	REACTOME_INHIBITION_OF_THE_PROTEOLYTIC_ACTIVITY_OF_APC_C_REQUIRED_FOR_THE_ONSET_OF_ANAPHASE_BY_MITOTIC_SPINDLE_CHECKPOINT_COMPONENTS	20	-0.524107	-1.38463	0.0882353	0.304024	0.242303	3720	tags=50%, list=23%, signal=39%	ANAPC11/CDC23/ANAPC10/BUB1B/UBE2E1/BUB3/MAD2L1/CDC27/CDC20/UBE2S
REACTOME_DDX58_IFIH1_MEDIATED_INDUCTION_OF_INTERFERON_ALPHA_BETA	REACTOME_DDX58_IFIH1_MEDIATED_INDUCTION_OF_INTERFERON_ALPHA_BETA	REACTOME_DDX58_IFIH1_MEDIATED_INDUCTION_OF_INTERFERON_ALPHA_BETA	75	-0.347501	-1.25253	0.0888325	0.305568	0.243534	3489	tags=27%, list=22%, signal=21%	MAP3K1/UBB/PIN1/HSP90AB1/NFKBIA/CHUK/FADD/UBA52/TRAF3/NKIRAS1/S100B/NFKB2/IFIH1/NLRC5/HSP90AA1/IRF7/RNF125/S100A12/UBE2L6/ISG15
REACTOME_HSP90_CHAPERONE_CYCLE_FOR_STEROID_HORMONE_RECEPTORS_SHR_IN_THE_PRESENCE_OF_LIGAND	REACTOME_HSP90_CHAPERONE_CYCLE_FOR_STEROID_HORMONE_RECEPTORS_SHR_IN_THE_PRESENCE_OF_LIGAND	REACTOME_HSP90_CHAPERONE_CYCLE_FOR_STEROID_HORMONE_RECEPTORS_SHR_IN_THE_PRESENCE_OF_LIGAND	49	-0.404191	-1.32755	0.0888889	0.305568	0.243534	3989	tags=47%, list=25%, signal=35%	TUBB4B/PTGES3/DYNLL1/ACTR10/HSP90AB1/DYNC1LI1/ACTR1A/DCTN6/CAPZB/FKBP4/TUBB3/TUBA4A/STIP1/TUBA1C/DNAJA1/HSPA2/NR3C1/TUBB2B/TUBA1B/HSP90AA1/TUBA1A/TUBB2A/TUBB6
BIOCARTA_EPONFKB_PATHWAY	BIOCARTA_EPONFKB_PATHWAY	BIOCARTA_EPONFKB_PATHWAY	11	-0.617137	-1.42605	0.0895197	0.306786	0.244505	883	tags=45%, list=5%, signal=43%	EPOR/NFKBIA/JAK2/SOD2/HIF1A
KEGG_MEDICUS_REFERENCE_REGULATION_OF_GF_RTK_RAS_ERK_SIGNALING_PATHWAY_ADAPTOR_PROTEINS	KEGG_MEDICUS_REFERENCE_REGULATION_OF_GF_RTK_RAS_ERK_SIGNALING_PATHWAY_ADAPTOR_PROTEINS	KEGG_MEDICUS_REFERENCE_REGULATION_OF_GF_RTK_RAS_ERK_SIGNALING_PATHWAY_ADAPTOR_PROTEINS	10	0.658101	1.40991	0.0895522	0.306786	0.244505	3380	tags=60%, list=21%, signal=47%	GAB1/SHC3/SOS2/SHC2/SOS1/GAB2
REACTOME_GAMMA_CARBOXYLATION_TRANSPORT_AND_AMINO_TERMINAL_CLEAVAGE_OF_PROTEINS	REACTOME_GAMMA_CARBOXYLATION_TRANSPORT_AND_AMINO_TERMINAL_CLEAVAGE_OF_PROTEINS	REACTOME_GAMMA_CARBOXYLATION_TRANSPORT_AND_AMINO_TERMINAL_CLEAVAGE_OF_PROTEINS	10	0.65939	1.41267	0.0895522	0.306786	0.244505	1775	tags=40%, list=11%, signal=36%	F10/F7/PROC/F2
WP_PROXIMAL_TUBULE_TRANSPORT	WP_PROXIMAL_TUBULE_TRANSPORT	WP_PROXIMAL_TUBULE_TRANSPORT	54	0.421924	1.32245	0.0898502	0.307453	0.245036	796	tags=15%, list=5%, signal=14%	CA4/ABCB1/SLC5A1/ATP1A1/SLC3A1/SLC9A3/SLC13A3/SLC22A11
KEGG_MEDICUS_REFERENCE_MEVALONATE_PATHWAY	KEGG_MEDICUS_REFERENCE_MEVALONATE_PATHWAY	KEGG_MEDICUS_REFERENCE_MEVALONATE_PATHWAY	12	0.62788	1.41715	0.0900735	0.307863	0.245363	4465	tags=58%, list=28%, signal=42%	HMGCS2/HMGCR/IDI1/MVD/MVK/ACAT1/ACAT2
KEGG_MEDICUS_REFERENCE_WNT_SIGNALING_PATHWAY	KEGG_MEDICUS_REFERENCE_WNT_SIGNALING_PATHWAY	KEGG_MEDICUS_REFERENCE_WNT_SIGNALING_PATHWAY	43	0.440247	1.31942	0.0904348	0.308605	0.245954	2371	tags=30%, list=15%, signal=26%	AXIN2/TCF7/AXIN1/WNT5B/FZD5/FRAT2/LRP6/FRAT1/WNT4/FZD9/TCF7L2/FZD10/WNT2B
KEGG_MEDICUS_REFERENCE_TLR1_2_4_NFKB_SIGNALING_PATHWAY	KEGG_MEDICUS_REFERENCE_TLR1_2_4_NFKB_SIGNALING_PATHWAY	KEGG_MEDICUS_REFERENCE_TLR1_2_4_NFKB_SIGNALING_PATHWAY	20	-0.523226	-1.3823	0.0904977	0.308605	0.245954	457	tags=30%, list=3%, signal=29%	NFKBIA/CHUK/TNF/TLR1/TLR2/IL6
BIOCARTA_PPARA_PATHWAY	BIOCARTA_PPARA_PATHWAY	BIOCARTA_PPARA_PATHWAY	51	0.432106	1.34171	0.0907563	0.309132	0.246374	3331	tags=45%, list=21%, signal=36%	FABP1/PRKACB/JUN/PPARGC1A/ACOX1/PIK3R1/PPARA/PRKAR2A/NR0B2/NRIP1/LPL/EHHADH/CREBBP/PRKCA/HSD17B4/RXRA/MAPK3/PRKAR1B/PDGFA/NCOR2/MYC/APOA1/SP1
KEGG_REGULATION_OF_ACTIN_CYTOSKELETON	KEGG_REGULATION_OF_ACTIN_CYTOSKELETON	KEGG_REGULATION_OF_ACTIN_CYTOSKELETON	207	-0.290208	-1.18054	0.0909091	0.309299	0.246507	2498	tags=25%, list=15%, signal=21%	ITGB1/ACTB/PDGFB/PIK3R3/ITGA1/RRAS2/ITGA7/EZR/VCL/PIK3CG/MYL12A/ACTN1/GNA12/MYL9/ITGA4/PIP4K2A/RRAS/ITGA11/PIK3CD/FGFR1/ITGAL/ITGAE/PAK6/BAIAP2/ITGAV/NCKAP1L/FGF2/FGF7/PIK3R5/ITGA3/RAC2/HRAS/F2R/ARHGEF6/TIAM1/RAC3/RDX/PDGFRB/MSN/PFN1/PDGFC/MRAS/FN1/MYH10/ITGAX/CFL2/ITGA5/ITGB2/CD14/WASF1/ITGAM
PID_TAP63_PATHWAY	PID_TAP63_PATHWAY	PID_TAP63_PATHWAY	52	-0.389885	-1.30173	0.091133	0.309564	0.246718	1326	tags=25%, list=8%, signal=23%	ITGA3/PLK1/IGFBP3/CDKN2A/FAS/MFGE8/FDXR/ADA/EGR2/TFAP2C/S100A2/PMAIP1/SERPINB5
REACTOME_SARS_COV_INFECTIONS	REACTOME_SARS_COV_INFECTIONS	REACTOME_SARS_COV_INFECTIONS	388	-0.262525	-1.13775	0.091195	0.309564	0.246718	3551	tags=30%, list=22%, signal=24%	IFNGR1/RPS16/NUP133/NUP205/VPS18/FXYD4/CHD3/IFNAR2/UBB/GOLGA7/ROCK1/HLA-B/KDM1A/VAV1/RBX1/HSP90AB1/NFKBIA/CHUK/PARP8/SNRPG/RCOR1/RPS8/NUP62/RBBP4/TLR7/HLA-G/NUP160/NUP50/UBA52/DDX20/HSPG2/NUP35/HMG20B/HLA-E/HLA-C/RPS18/RPS12/DDOST/NUP155/TRAF3/ITGB1/AP2B1/MTA1/FKBP4/FAU/GALNT1/BTK/SNRPD2/MGAT1/ANO6/SEC24A/JAK3/PLCG2/SEC13/PRMT1/NUP210/ITGA4/PARP14/RPS5/ST3GAL1/MGAT2/HLA-F/RPN1/AKT1/AP2S1/STAT2/YW…
KEGG_MEDICUS_PATHOGEN_HIV_GP120_TO_CXCR4_GNB_G_RAC_SIGNALING_PATHWAY	KEGG_MEDICUS_PATHOGEN_HIV_GP120_TO_CXCR4_GNB_G_RAC_SIGNALING_PATHWAY	KEGG_MEDICUS_PATHOGEN_HIV_GP120_TO_CXCR4_GNB_G_RAC_SIGNALING_PATHWAY	26	-0.470023	-1.32977	0.0915332	0.310358	0.247351	1716	tags=35%, list=11%, signal=31%	GNG10/RAC2/GNB5/GNG11/RAC3/CCR5/GNB4/CFL2/CXCR4
REACTOME_SIGNALING_BY_LEPTIN	REACTOME_SIGNALING_BY_LEPTIN	REACTOME_SIGNALING_BY_LEPTIN	11	-0.614708	-1.42043	0.0917031	0.31058	0.247529	883	tags=27%, list=5%, signal=26%	JAK2/IRS1/SOCS3
KEGG_MEDICUS_REFERENCE_BETA_OXIDATION	KEGG_MEDICUS_REFERENCE_BETA_OXIDATION	KEGG_MEDICUS_REFERENCE_BETA_OXIDATION	11	0.63867	1.41372	0.0919118	0.310933	0.24781	4107	tags=73%, list=25%, signal=54%	ACADS/HADH/ACAA2/HADHA/ACADSB/ACADM/ACAT1/HADHB
REACTOME_VIRAL_MESSENGER_RNA_SYNTHESIS	REACTOME_VIRAL_MESSENGER_RNA_SYNTHESIS	REACTOME_VIRAL_MESSENGER_RNA_SYNTHESIS	42	-0.418364	-1.32816	0.0925926	0.312881	0.249362	4067	tags=45%, list=25%, signal=34%	NUP93/NUP37/NUP43/NUP133/NUP205/NUP62/NUP160/NUP50/NUP35/NUP155/SEC13/NUP210/POLR2E/POLR2A/POLR2I/POLR2G/NDC1/POLR2L/SEH1L
WP_MITOCHONDRIAL_LONG_CHAIN_FATTY_ACID_BETA_OXIDATION	WP_MITOCHONDRIAL_LONG_CHAIN_FATTY_ACID_BETA_OXIDATION	WP_MITOCHONDRIAL_LONG_CHAIN_FATTY_ACID_BETA_OXIDATION	17	0.569588	1.40167	0.0927273	0.312981	0.249442	3049	tags=65%, list=19%, signal=53%	ACSF2/ACADS/HADH/SLC25A20/PECR/EHHADH/HADHA/SCP2/ACSL3/CPT1A/ACADM
BIOCARTA_IL2RB_PATHWAY	BIOCARTA_IL2RB_PATHWAY	BIOCARTA_IL2RB_PATHWAY	37	-0.428676	-1.31148	0.0932401	0.314355	0.250537	2373	tags=41%, list=15%, signal=35%	RPS6KB1/FASLG/IKZF3/JAK3/PIK3CG/FOS/AKT1/NMI/HRAS/SOCS1/FAS/IL2RA/IL2RB/IRS1/SOCS3
REACTOME_NEUROTRANSMITTER_RELEASE_CYCLE	REACTOME_NEUROTRANSMITTER_RELEASE_CYCLE	REACTOME_NEUROTRANSMITTER_RELEASE_CYCLE	49	0.434419	1.34369	0.0938023	0.315819	0.251704	2008	tags=27%, list=12%, signal=23%	ABAT/SLC1A7/MAOA/NAAA/DNAJC5/CASK/PPFIA3/LIN7B/LIN7A/SYN3/SYT1/GLS/UNC13B
KEGG_MEDICUS_REFERENCE_CENPE_INTERACTION_WITH_NDC80_COMPLEX	KEGG_MEDICUS_REFERENCE_CENPE_INTERACTION_WITH_NDC80_COMPLEX	KEGG_MEDICUS_REFERENCE_CENPE_INTERACTION_WITH_NDC80_COMPLEX	12	-0.607272	-1.42628	0.0938865	0.315819	0.251704	2847	tags=58%, list=18%, signal=48%	PPP1CA/CENPE/SPC25/KNSTRN/AURKB/NUF2/NDC80
REACTOME_CHYLOMICRON_ASSEMBLY	REACTOME_CHYLOMICRON_ASSEMBLY	REACTOME_CHYLOMICRON_ASSEMBLY	10	-0.625194	-1.40975	0.0944206	0.317148	0.252763	2231	tags=30%, list=14%, signal=26%	P4HB/APOA2/APOE
WP_COMMON_PATHWAYS_UNDERLYING_DRUG_ADDICTION	WP_COMMON_PATHWAYS_UNDERLYING_DRUG_ADDICTION	WP_COMMON_PATHWAYS_UNDERLYING_DRUG_ADDICTION	40	0.450204	1.32433	0.0945709	0.317148	0.252763	158	tags=8%, list=1%, signal=7%	DRD2/GJB1/PRKACB
REACTOME_FORMATION_OF_FIBRIN_CLOT_CLOTTING_CASCADE	REACTOME_FORMATION_OF_FIBRIN_CLOT_CLOTTING_CASCADE	REACTOME_FORMATION_OF_FIBRIN_CLOT_CLOTTING_CASCADE	38	-0.421988	-1.30104	0.0946882	0.317148	0.252763	2164	tags=32%, list=13%, signal=27%	F13A1/PF4V1/F12/VWF/F2R/PROCR/F3/THBD/C1QBP/F5/TFPI/SERPING1
KEGG_MAPK_SIGNALING_PATHWAY	KEGG_MAPK_SIGNALING_PATHWAY	KEGG_MAPK_SIGNALING_PATHWAY	254	-0.279839	-1.17123	0.0947075	0.317148	0.252763	2320	tags=22%, list=14%, signal=19%	RRAS2/FASLG/RELB/PPP3R1/PLA2G3/MAP2K4/FOS/GNA12/TGFB2/MAPK11/GADD45B/RRAS/TNF/AKT1/FGFR1/MAP4K4/STK3/CACNA2D1/MAP3K5/NFKB2/TGFBR1/PTPN7/HSPB1/HSPA2/RASGRP3/AKT3/DUSP2/FGF2/FGF7/RAC2/HRAS/RAC3/MAP3K8/PDGFRB/DUSP7/FAS/FLNC/RASGRP1/IL1R1/DUSP6/DUSP10/MRAS/RASGRF2/DUSP5/TGFB3/MAP3K6/DUSP14/HSPA6/TGFB1/FLNA/CD14/IL1B/IL1R2/PLA2G4A/PLA2G2A/DUSP4
REACTOME_CHOLESTEROL_BIOSYNTHESIS	REACTOME_CHOLESTEROL_BIOSYNTHESIS	REACTOME_CHOLESTEROL_BIOSYNTHESIS	25	0.510057	1.37485	0.0949914	0.3175	0.253044	5306	tags=60%, list=33%, signal=40%	SREBF2/MSMO1/EBP/HSD17B7/HMGCR/IDI1/FDFT1/ARV1/MVD/MVK/TM7SF2/LBR/ACAT2/HMGCS1/SQLE
REACTOME_HOMOLOGOUS_DNA_PAIRING_AND_STRAND_EXCHANGE	REACTOME_HOMOLOGOUS_DNA_PAIRING_AND_STRAND_EXCHANGE	REACTOME_HOMOLOGOUS_DNA_PAIRING_AND_STRAND_EXCHANGE	40	-0.424824	-1.32471	0.0951276	0.3175	0.253044	2771	tags=32%, list=17%, signal=27%	NBN/CHEK1/RFC5/XRCC3/RAD51/RFC4/RAD51AP1/RFC2/RAD51C/RPA1/RPA2/EXO1/RBBP8
BIOCARTA_MTA3_PATHWAY	BIOCARTA_MTA3_PATHWAY	BIOCARTA_MTA3_PATHWAY	17	-0.534618	-1.3798	0.0951327	0.3175	0.253044	2939	tags=59%, list=18%, signal=48%	HSPB2/MTA1/CTSD/TUBA4A/SNAI1/HSPB1/ALDOA/GAPDH/TUBA1A/SNAI2
WP_PANCREATIC_ADENOCARCINOMA_PATHWAY	WP_PANCREATIC_ADENOCARCINOMA_PATHWAY	WP_PANCREATIC_ADENOCARCINOMA_PATHWAY	87	-0.353418	-1.28803	0.0954687	0.318265	0.253653	2396	tags=26%, list=15%, signal=23%	PIK3R3/RPS6KB1/SMAD2/RALBP1/RAD51/CCND1/TGFB2/GADD45B/AKT1/PIK3CD/DDB2/PAK6/TGFBR1/AKT3/RAC2/ARHGEF6/TIAM1/RAC3/CDKN2A/DUSP6/TGFB3/TGFB1/STAT1
REACTOME_SUMOYLATION_OF_INTRACELLULAR_RECEPTORS	REACTOME_SUMOYLATION_OF_INTRACELLULAR_RECEPTORS	REACTOME_SUMOYLATION_OF_INTRACELLULAR_RECEPTORS	29	0.49385	1.35366	0.0962567	0.320419	0.25537	1274	tags=24%, list=8%, signal=22%	NR1I2/PPARG/NR3C2/PPARA/NR5A2/VDR/NR1H4
WP_CANCER_IMMUNOTHERAPY_BY_PD_1_BLOCKADE	WP_CANCER_IMMUNOTHERAPY_BY_PD_1_BLOCKADE	WP_CANCER_IMMUNOTHERAPY_BY_PD_1_BLOCKADE	22	-0.510399	-1.37435	0.0963303	0.320419	0.25537	933	tags=41%, list=6%, signal=39%	CD3E/CD3D/BATF/NFATC1/PDCD1LG2/CD8A/IFNG/CD274/LCK
BIOCARTA_SODD_PATHWAY	BIOCARTA_SODD_PATHWAY	BIOCARTA_SODD_PATHWAY	10	-0.620986	-1.40027	0.0965665	0.320847	0.255711	3095	tags=50%, list=19%, signal=40%	FADD/TNFRSF1B/TNF/BAG4/BIRC3
WP_TOLL_LIKE_RECEPTOR_SIGNALING_RELATED_TO_MYD88	WP_TOLL_LIKE_RECEPTOR_SIGNALING_RELATED_TO_MYD88	WP_TOLL_LIKE_RECEPTOR_SIGNALING_RELATED_TO_MYD88	30	-0.455757	-1.32331	0.0967742	0.321178	0.255975	3214	tags=37%, list=20%, signal=29%	CHUK/TLR7/TLR6/TRAF3/TLR5/RELB/NFKB2/IRF7/TLR1/TLR8/TLR2
REACTOME_ESTROGEN_DEPENDENT_NUCLEAR_EVENTS_DOWNSTREAM_OF_ESR_MEMBRANE_SIGNALING	REACTOME_ESTROGEN_DEPENDENT_NUCLEAR_EVENTS_DOWNSTREAM_OF_ESR_MEMBRANE_SIGNALING	REACTOME_ESTROGEN_DEPENDENT_NUCLEAR_EVENTS_DOWNSTREAM_OF_ESR_MEMBRANE_SIGNALING	23	0.518838	1.36889	0.0978648	0.324075	0.258284	2519	tags=35%, list=16%, signal=29%	EREG/AREG/FOXO3/EGFR/BCL2/CDKN1B/HBEGF/MAPK3
WP_SARS_COV_2_MITOCHONDRIAL_CHRONIC_OXIDATIVE_STRESS_AND_ENDOTHELIAL_DYSFUNCTION	WP_SARS_COV_2_MITOCHONDRIAL_CHRONIC_OXIDATIVE_STRESS_AND_ENDOTHELIAL_DYSFUNCTION	WP_SARS_COV_2_MITOCHONDRIAL_CHRONIC_OXIDATIVE_STRESS_AND_ENDOTHELIAL_DYSFUNCTION	23	0.518636	1.36836	0.0978648	0.324075	0.258284	1042	tags=22%, list=6%, signal=20%	ACE2/NOX1/AGT/MAVS/REN
BIOCARTA_WNT_PATHWAY	BIOCARTA_WNT_PATHWAY	BIOCARTA_WNT_PATHWAY	24	0.512197	1.35932	0.0985915	0.325795	0.259654	3344	tags=42%, list=21%, signal=33%	WIF1/AXIN1/HNF1A/CREBBP/FRAT1/TLE1/CSNK2A1/MYC/NLK/GSK3B
BIOCARTA_SET_PATHWAY	BIOCARTA_SET_PATHWAY	BIOCARTA_SET_PATHWAY	10	-0.618026	-1.39359	0.0987124	0.325795	0.259654	3068	tags=50%, list=19%, signal=41%	APEX1/DFFB/GZMB/PRF1/GZMA
KEGG_MEDICUS_ENV_FACTOR_NNK_NNN_TO_PI3K_SIGNALING_PATHWAY_N01339	KEGG_MEDICUS_ENV_FACTOR_NNK_NNN_TO_PI3K_SIGNALING_PATHWAY_N01339	KEGG_MEDICUS_ENV_FACTOR_NNK_NNN_TO_PI3K_SIGNALING_PATHWAY_N01339	10	-0.616787	-1.3908	0.0987124	0.325795	0.259654	1853	tags=40%, list=11%, signal=35%	AKT1/PIK3CD/AKT3/BIRC5
REACTOME_UNFOLDED_PROTEIN_RESPONSE_UPR	REACTOME_UNFOLDED_PROTEIN_RESPONSE_UPR	REACTOME_UNFOLDED_PROTEIN_RESPONSE_UPR	87	-0.342914	-1.24975	0.0989011	0.326056	0.259863	3302	tags=28%, list=20%, signal=22%	EXOSC3/IGFBP1/CREB3/DNAJB11/SRPRB/LMNA/CALR/PDIA6/HYOU1/EXOSC4/DCSTAMP/WFS1/HSPA5/SSR1/YIF1A/EXOSC9/EXTL2/FKBP14/HSP90B1/EIF2S1/CREB3L1/KDELR3/CCL2/CXCL8
KEGG_AXON_GUIDANCE	KEGG_AXON_GUIDANCE	KEGG_AXON_GUIDANCE	128	0.340735	1.24057	0.0990566	0.326155	0.259941	1330	tags=17%, list=8%, signal=16%	CHP2/SEMA5A/SEMA6A/SEMA3C/EPHB2/NFATC2/ROCK2/SEMA6D/ABLIM2/NGEF/NCK2/EPHB1/EPHB3/PLXNA2/PLXNB1/EFNA4/NTN4/EFNA1/ABL1/EFNA2/LIMK2/NFAT5
WP_CILIOPATHIES	WP_CILIOPATHIES	WP_CILIOPATHIES	157	-0.306362	-1.21007	0.0991501	0.326155	0.259941	3346	tags=29%, list=21%, signal=23%	ANKS6/IFT81/CEP120/ARL3/TMEM67/WDR19/BBS4/TMEM17/SDCCAG8/PDE6D/RAB28/DNAAF2/EVC2/CLUAP1/CCDC28B/CEP78/PLK4/FAM161A/SPATA7/ARL2BP/LCA5/DCDC2/DNAL1/IFT43/GPR161/EVC/BBS12/GLI3/BBS7/ARL6/GLI2/TTC8/CEP19/NEK2/B9D1/TMEM237/CCNO/TMEM107/ARL13B/TMEM231/PKD2/DNAAF3/RSPH1/RAB23/GLIS2/ZIC2
REACTOME_TGF_BETA_RECEPTOR_SIGNALING_ACTIVATES_SMADS	REACTOME_TGF_BETA_RECEPTOR_SIGNALING_ACTIVATES_SMADS	REACTOME_TGF_BETA_RECEPTOR_SIGNALING_ACTIVATES_SMADS	44	-0.405303	-1.29527	0.0995261	0.32703	0.260639	3582	tags=45%, list=22%, signal=35%	ITGB5/ITGB3/UBB/UBA52/PPP1CA/SMURF2/ITGB1/SMAD2/UCHL5/TGFB2/LTBP2/LTBP3/TGFBR1/ITGAV/NEDD8/UBE2M/TGFB3/BAMBI/TGFB1/FBN1
REACTOME_INTERLEUKIN_3_INTERLEUKIN_5_AND_GM_CSF_SIGNALING	REACTOME_INTERLEUKIN_3_INTERLEUKIN_5_AND_GM_CSF_SIGNALING	REACTOME_INTERLEUKIN_3_INTERLEUKIN_5_AND_GM_CSF_SIGNALING	48	-0.404116	-1.31446	0.10049	0.329834	0.262873	2396	tags=27%, list=15%, signal=23%	PIK3R3/JAK3/IL3RA/PIK3CD/CSF2/CSF2RA/JAK2/IL2RA/IL2RB/LYN/HCK/CSF2RB/FYN
KEGG_BASAL_CELL_CARCINOMA	KEGG_BASAL_CELL_CARCINOMA	KEGG_BASAL_CELL_CARCINOMA	52	0.423349	1.32024	0.100671	0.330064	0.263057	2371	tags=29%, list=15%, signal=25%	AXIN2/TCF7/SHH/PTCH1/AXIN1/WNT5B/FZD5/WNT11/STK36/WNT4/FZD9/SMO/TCF7L2/FZD10/WNT2B
BIOCARTA_PLATELETAPP_PATHWAY	BIOCARTA_PLATELETAPP_PATHWAY	BIOCARTA_PLATELETAPP_PATHWAY	14	-0.575494	-1.4094	0.101099	0.331102	0.263884	1405	tags=29%, list=9%, signal=26%	COL4A2/COL4A1/SERPINE1/PLAU
REACTOME_POLYMERASE_SWITCHING_ON_THE_C_STRAND_OF_THE_TELOMERE	REACTOME_POLYMERASE_SWITCHING_ON_THE_C_STRAND_OF_THE_TELOMERE	REACTOME_POLYMERASE_SWITCHING_ON_THE_C_STRAND_OF_THE_TELOMERE	24	-0.481564	-1.33592	0.101382	0.331666	0.264333	5077	tags=67%, list=31%, signal=46%	POLA2/TERF2/DSCC1/POT1/PCNA/CHTF18/POLD2/RFC1/POLD1/PRIM1/TINF2/RFC5/PRIM2/RFC4/RFC2/ACD
WP_ERBB_SIGNALING_PATHWAY	WP_ERBB_SIGNALING_PATHWAY	WP_ERBB_SIGNALING_PATHWAY	88	0.372179	1.27645	0.101881	0.33293	0.265341	3148	tags=28%, list=19%, signal=23%	EREG/JUN/AREG/PIK3R1/NCK2/ERBB3/ABL1/GAB1/EGFR/SHC3/PDPK1/SRC/SOS2/CDKN1B/HBEGF/PAK1/PRKCA/SHC2/PIK3CB/MAPK3/SOS1/ERBB2/MAP2K7/MYC/PAK4
WP_STRIATED_MUSCLE_CONTRACTION_PATHWAY	WP_STRIATED_MUSCLE_CONTRACTION_PATHWAY	WP_STRIATED_MUSCLE_CONTRACTION_PATHWAY	37	-0.42404	-1.2973	0.102564	0.334514	0.266604	2417	tags=30%, list=15%, signal=25%	TPM2/ACTA2/TNNI2/MYL9/TMOD1/TNNI3/ACTC1/DES/VIM/TNNC1/TNNT1
REACTOME_ZINC_INFLUX_INTO_CELLS_BY_THE_SLC39_GENE_FAMILY	REACTOME_ZINC_INFLUX_INTO_CELLS_BY_THE_SLC39_GENE_FAMILY	REACTOME_ZINC_INFLUX_INTO_CELLS_BY_THE_SLC39_GENE_FAMILY	10	0.649723	1.39196	0.102612	0.334514	0.266604	173	tags=20%, list=1%, signal=20%	SLC39A5/SLC39A2
WP_CALCIUM_REGULATION_IN_CARDIAC_CELLS	WP_CALCIUM_REGULATION_IN_CARDIAC_CELLS	WP_CALCIUM_REGULATION_IN_CARDIAC_CELLS	146	-0.306731	-1.20511	0.102703	0.334514	0.266604	2374	tags=24%, list=15%, signal=21%	CALR/GNG2/PRKCH/GNAZ/GJC1/RGS18/ADRB1/YWHAE/KCNJ3/RGS14/STIM2/GJB6/GJA3/GNAI3/SFN/PRKD1/GNB5/GJA4/GNG11/RGS4/RGS1/RGS19/GJA5/GNAI2/RGS10/GNB4/PLN/RGS16/ADCY7/GJA1/GJB3/GJB2/PRKAR2B/RGS2/GJB5
WP_ENERGY_METABOLISM	WP_ENERGY_METABOLISM	WP_ENERGY_METABOLISM	46	0.432089	1.31544	0.102867	0.334613	0.266682	1241	tags=15%, list=8%, signal=14%	PPARG/FOXO3/PPARGC1A/PRKAB1/PPARA/ESRRA/PPARGC1B
PID_PLK1_PATHWAY	PID_PLK1_PATHWAY	PID_PLK1_PATHWAY	43	-0.404751	-1.29039	0.103044	0.334613	0.266682	3018	tags=44%, list=19%, signal=36%	BUB1B/CDK1/ERCC6L/CENPE/PPP1R12A/INCENP/PRC1/NUDC/CENPU/FBXO5/CLSPN/BUB1/ECT2/PLK1/TUBG1/KIF20A/CCNB1/CDC20/NDC80
REACTOME_WNT5A_DEPENDENT_INTERNALIZATION_OF_FZD2_FZD5_AND_ROR2	REACTOME_WNT5A_DEPENDENT_INTERNALIZATION_OF_FZD2_FZD5_AND_ROR2	REACTOME_WNT5A_DEPENDENT_INTERNALIZATION_OF_FZD2_FZD5_AND_ROR2	13	-0.577287	-1.38017	0.10307	0.334613	0.266682	2480	tags=54%, list=15%, signal=46%	AP2B1/AP2S1/AP2M1/WNT5A/ROR1/ROR2/FZD2
WP_SPHINGOLIPID_METABOLISM_INTEGRATED_PATHWAY	WP_SPHINGOLIPID_METABOLISM_INTEGRATED_PATHWAY	WP_SPHINGOLIPID_METABOLISM_INTEGRATED_PATHWAY	22	-0.504518	-1.35852	0.103211	0.334705	0.266756	1227	tags=27%, list=8%, signal=25%	KDSR/SGMS2/SGPP1/DEGS1/SGMS1/SPHK1
WP_LIPID_METABOLISM_PATHWAY	WP_LIPID_METABOLISM_PATHWAY	WP_LIPID_METABOLISM_PATHWAY	29	0.489587	1.34198	0.103387	0.334745	0.266788	3083	tags=34%, list=19%, signal=28%	PRKACB/ACSS2/PRKAB1/PDHA1/PRKAR2A/HILPDA/PLIN1/PNPLA2/PRKAR1B/PRKAA1
REACTOME_RESPIRATORY_ELECTRON_TRANSPORT	REACTOME_RESPIRATORY_ELECTRON_TRANSPORT	REACTOME_RESPIRATORY_ELECTRON_TRANSPORT	88	0.370702	1.27139	0.103448	0.334745	0.266788	5826	tags=48%, list=36%, signal=31%	CYCS/COX19/NUBPL/COX5A/UQCRC2/LRPPRC/ETFDH/COX5B/UQCR11/COX20/COX4I1/NDUFS1/SDHD/TMEM186/COX6A1/NDUFA5/UQCRQ/COX7B/NDUFA7/COX6C/COX14/NDUFB11/NDUFB1/NDUFB5/NDUFB4/NDUFA1/NDUFAF4/NDUFB3/NDUFV1/NDUFA10/NDUFC1/NDUFB2/NDUFA2/UQCRB/NDUFB8/SURF1/ETFA/COX18/NDUFA8/NDUFAF5/NDUFA3/COX6B1
WP_MYOMETRIAL_RELAXATION_AND_CONTRACTION_PATHWAYS	WP_MYOMETRIAL_RELAXATION_AND_CONTRACTION_PATHWAYS	WP_MYOMETRIAL_RELAXATION_AND_CONTRACTION_PATHWAYS	151	-0.304642	-1.20027	0.103825	0.3356	0.267469	2465	tags=25%, list=15%, signal=22%	PDE4D/RAMP3/ACTB/ACTA2/GNG2/PRKCH/PLCG2/FOS/RGS18/YWHAE/RGS14/IGFBP4/SFN/PRKD1/GNB5/GNG11/RGS4/RGS1/CALD1/RGS19/IGFBP3/GSTO1/ACTC1/CNN1/IGFBP5/ADM/RGS10/GNB4/IGFBP6/RGS16/ADCY7/GJA1/PDE4B/PRKAR2B/RGS2/IL1B/IL6/RAMP1
KEGG_MEDICUS_REFERENCE_NUCLEAR_EXPORT_OF_MRNA	KEGG_MEDICUS_REFERENCE_NUCLEAR_EXPORT_OF_MRNA	KEGG_MEDICUS_REFERENCE_NUCLEAR_EXPORT_OF_MRNA	29	-0.455874	-1.32053	0.104308	0.336442	0.26814	4067	tags=45%, list=25%, signal=34%	NUP93/NUP37/NUP43/NUP133/NUP205/NUP62/NUP160/NUP35/NUP155/NUP210/NDC1/ALYREF/SEH1L
WP_VITAMIN_K_METABOLISM_AND_ACTIVATION_OF_DEPENDENT_PROTEINS	WP_VITAMIN_K_METABOLISM_AND_ACTIVATION_OF_DEPENDENT_PROTEINS	WP_VITAMIN_K_METABOLISM_AND_ACTIVATION_OF_DEPENDENT_PROTEINS	13	0.606809	1.39237	0.104396	0.336442	0.26814	3347	tags=46%, list=21%, signal=37%	F10/F7/PROC/F2/NQO1/PROZ
KEGG_MEDICUS_REFERENCE_ANGIOTENSIN_ALDOSTERONE_SIGNALING_PATHWAY	KEGG_MEDICUS_REFERENCE_ANGIOTENSIN_ALDOSTERONE_SIGNALING_PATHWAY	KEGG_MEDICUS_REFERENCE_ANGIOTENSIN_ALDOSTERONE_SIGNALING_PATHWAY	26	0.501742	1.34807	0.104425	0.336442	0.26814	1006	tags=12%, list=6%, signal=11%	PLCB4/CAMK1D/PLCB1
REACTOME_FORMATION_OF_APOPTOSOME	REACTOME_FORMATION_OF_APOPTOSOME	REACTOME_FORMATION_OF_APOPTOSOME	11	0.62518	1.38386	0.104779	0.33722	0.26876	3575	tags=45%, list=22%, signal=35%	APIP/CYCS/XIAP/MAPK3/APAF1
PID_IL2_1PATHWAY	PID_IL2_1PATHWAY	PID_IL2_1PATHWAY	55	-0.375363	-1.26292	0.105263	0.338411	0.269709	1213	tags=27%, list=8%, signal=25%	IKZF3/JAK3/FOS/MAPK11/HRAS/DOK2/SOCS1/IL2RA/IFNG/IL2RB/IRS1/SOCS3/STAT1/FYN/LCK
KEGG_CALCIUM_SIGNALING_PATHWAY	KEGG_CALCIUM_SIGNALING_PATHWAY	KEGG_CALCIUM_SIGNALING_PATHWAY	172	0.319198	1.21019	0.105581	0.339066	0.270231	1679	tags=13%, list=10%, signal=12%	PLCB4/CHP2/TNNC2/PRKACB/GRPR/CACNA1D/PLCG1/ITPR2/ERBB3/PLCD1/PLCE1/PLCB1/ADORA2B/CHRM3/ATP2A3/SPHK2/PHKA2/EGFR/HTR4/GNA11/EDNRB/PTK2B/PHKB
REACTOME_REGULATION_OF_GLUCOKINASE_BY_GLUCOKINASE_REGULATORY_PROTEIN	REACTOME_REGULATION_OF_GLUCOKINASE_BY_GLUCOKINASE_REGULATORY_PROTEIN	REACTOME_REGULATION_OF_GLUCOKINASE_BY_GLUCOKINASE_REGULATORY_PROTEIN	30	-0.446898	-1.29758	0.105991	0.340016	0.270988	4626	tags=53%, list=29%, signal=38%	NUP98/NUP54/NUP93/NUP37/NUP43/NUP133/NUP205/NUP62/NUP160/NUP50/NUP35/NUP155/SEC13/NUP210/NDC1/SEH1L
BIOCARTA_PGC1A_PATHWAY	BIOCARTA_PGC1A_PATHWAY	BIOCARTA_PGC1A_PATHWAY	13	0.604155	1.38628	0.106227	0.340174	0.271115	1100	tags=31%, list=7%, signal=29%	PPARGC1A/PPARA/ESRRA/HDAC5
WP_SYNTHESIS_OF_CERAMIDES_AND_1_DEOXYCERAMIDES	WP_SYNTHESIS_OF_CERAMIDES_AND_1_DEOXYCERAMIDES	WP_SYNTHESIS_OF_CERAMIDES_AND_1_DEOXYCERAMIDES	20	-0.512221	-1.35323	0.106335	0.340174	0.271115	1227	tags=25%, list=8%, signal=23%	KDSR/SGMS2/DES/SGMS1/SPHK1
KEGG_MEDICUS_REFERENCE_ITGA_B_FAK_CDC42_SIGNALING_PATHWAY	KEGG_MEDICUS_REFERENCE_ITGA_B_FAK_CDC42_SIGNALING_PATHWAY	KEGG_MEDICUS_REFERENCE_ITGA_B_FAK_CDC42_SIGNALING_PATHWAY	25	-0.479576	-1.32715	0.106383	0.340174	0.271115	3582	tags=52%, list=22%, signal=41%	ITGB5/GIT2/ITGB3/ITGB7/ITGB1/ITGA1/ITGA7/ITGA4/ITGA11/ITGAV/ITGA3/FN1/ITGA5
REACTOME_SIGNALING_BY_FGFR4_IN_DISEASE	REACTOME_SIGNALING_BY_FGFR4_IN_DISEASE	REACTOME_SIGNALING_BY_FGFR4_IN_DISEASE	11	0.624074	1.38141	0.106618	0.340559	0.271421	1221	tags=36%, list=8%, signal=34%	FGFR4/PIK3R1/PLCG1/GAB1
WP_NCRNAS_INVOLVED_IN_STAT3_SIGNALING_IN_HEPATOCELLULAR_CARCINOMA	WP_NCRNAS_INVOLVED_IN_STAT3_SIGNALING_IN_HEPATOCELLULAR_CARCINOMA	WP_NCRNAS_INVOLVED_IN_STAT3_SIGNALING_IN_HEPATOCELLULAR_CARCINOMA	12	-0.601476	-1.41267	0.106987	0.341372	0.272069	883	tags=33%, list=5%, signal=32%	JAK3/JAK2/IL11/IL6
WP_EPO_RECEPTOR_SIGNALING	WP_EPO_RECEPTOR_SIGNALING	WP_EPO_RECEPTOR_SIGNALING	26	-0.463916	-1.3125	0.107551	0.342806	0.273212	2208	tags=31%, list=14%, signal=27%	PIK3CG/AKT1/SOCS1/PTPRU/JAK2/PTPRC/IRS1/STAT1
KEGG_MEDICUS_REFERENCE_RAB7_REGULATED_MICROTUBULE_MINUS_END_DIRECTED_TRANSPORT	KEGG_MEDICUS_REFERENCE_RAB7_REGULATED_MICROTUBULE_MINUS_END_DIRECTED_TRANSPORT	KEGG_MEDICUS_REFERENCE_RAB7_REGULATED_MICROTUBULE_MINUS_END_DIRECTED_TRANSPORT	39	-0.416375	-1.293	0.108545	0.34552	0.275375	4005	tags=49%, list=25%, signal=37%	DYNC2H1/TUBB4B/DYNLL1/ACTR10/DYNC1LI1/ACTR1A/DCTN6/DYNLT1/TUBB3/TUBA4A/TUBA1C/TUBB/RAB7B/OSBPL1A/TUBB2B/TUBA1B/TUBA1A/TUBB2A/TUBB6
REACTOME_TRANSLATION	REACTOME_TRANSLATION	REACTOME_TRANSLATION	248	-0.273602	-1.14551	0.108635	0.34552	0.275375	4870	tags=40%, list=30%, signal=28%	MRPL10/MRPS23/RPS19/RPL29/RPL12/YARS2/EIF4G1/RPL36/MRPL9/RPL11/MRPL47/MRPS18C/SEC61A2/MRPL40/MRPL3/MRPL32/RPL24/EEF1A1/WARS2/MRPL19/EIF2B3/RPS29/MRPL37/MRPL44/TUFM/MRPL28/CHCHD1/RPL23A/MRPS6/MRPL11/FARSA/SARS2/MRPL4/EEF1A2/MRPL39/MRPL22/RPS16/MRPL27/SEC11A/RPL10A/GFM2/MRPS27/MRPS7/RPL19/OXA1L/RPS8/MRPL18/RPL35/SRP68/ETF1/UBA52/SSR2/SRPRB/SEC61A1/MRPS18A/MRPL54/RPL8/MRPL43/MRPS15/RPS18/MRPL21/MRPS…
REACTOME_RHOH_GTPASE_CYCLE	REACTOME_RHOH_GTPASE_CYCLE	REACTOME_RHOH_GTPASE_CYCLE	35	-0.432386	-1.29935	0.109049	0.346465	0.276129	1545	tags=23%, list=10%, signal=21%	PAK6/RHOH/ARHGDIB/TUBA1B/STOM/CAV1/DBN1/LCK
KEGG_MEDICUS_VARIANT_LOSS_OF_VHL_TO_HIF_1_SIGNALING_PATHWAY	KEGG_MEDICUS_VARIANT_LOSS_OF_VHL_TO_HIF_1_SIGNALING_PATHWAY	KEGG_MEDICUS_VARIANT_LOSS_OF_VHL_TO_HIF_1_SIGNALING_PATHWAY	12	-0.595497	-1.39862	0.10917	0.346482	0.276142	2443	tags=58%, list=15%, signal=50%	RBX1/PDGFB/TGFB2/TGFB3/HIF1A/SLC2A1/TGFB1
KEGG_MEDICUS_REFERENCE_HOMOLOGOUS_RECOMBINATION	KEGG_MEDICUS_REFERENCE_HOMOLOGOUS_RECOMBINATION	KEGG_MEDICUS_REFERENCE_HOMOLOGOUS_RECOMBINATION	32	-0.445319	-1.31941	0.109339	0.346649	0.276275	3464	tags=72%, list=21%, signal=57%	BRCA2/BRCA1/RAD51B/RAD54B/POLH/RPA3/POLE4/BARD1/PCNA/POLE3/POLD2/RFC1/POLD1/RAD54L/RFC5/XRCC3/RAD51/RFC4/RFC2/RAD51C/RPA1/RPA2/POLE2
REACTOME_PRE_NOTCH_EXPRESSION_AND_PROCESSING	REACTOME_PRE_NOTCH_EXPRESSION_AND_PROCESSING	REACTOME_PRE_NOTCH_EXPRESSION_AND_PROCESSING	48	0.421788	1.29588	0.111111	0.351891	0.280453	2073	tags=25%, list=13%, signal=22%	JUN/POFUT1/ELF3/NOTCH1/LFNG/ATP2A3/TFDP2/MAML2/TNRC6A/TNRC6B/CREBBP/E2F1
PID_INTEGRIN4_PATHWAY	PID_INTEGRIN4_PATHWAY	PID_INTEGRIN4_PATHWAY	11	-0.599322	-1.38488	0.111354	0.351926	0.280481	2117	tags=45%, list=13%, signal=40%	LAMC1/LAMC2/LAMA5/LAMA2/LAMB2
REACTOME_ACYL_CHAIN_REMODELLING_OF_PG	REACTOME_ACYL_CHAIN_REMODELLING_OF_PG	REACTOME_ACYL_CHAIN_REMODELLING_OF_PG	16	-0.526066	-1.33636	0.111359	0.351926	0.280481	216	tags=44%, list=1%, signal=43%	PLA2G2D/PLA2G5/PLA2G2F/PLA2G3/LPCAT1/PLA2G4A/PLA2G2A
REACTOME_SIGNALING_BY_ERBB2	REACTOME_SIGNALING_BY_ERBB2	REACTOME_SIGNALING_BY_ERBB2	48	0.421434	1.29479	0.112795	0.356086	0.283796	2684	tags=33%, list=17%, signal=28%	EREG/PTK6/PIK3R1/PLCG1/ERBB3/GAB1/EGFR/SRC/PRKCD/HBEGF/PRKCA/GRB7/SOS1/ERBB2/PRKCE/USP8
WP_APOPTOSIS_MODULATION_AND_SIGNALING	WP_APOPTOSIS_MODULATION_AND_SIGNALING	WP_APOPTOSIS_MODULATION_AND_SIGNALING	84	-0.334903	-1.21394	0.113514	0.357976	0.285303	3228	tags=29%, list=20%, signal=23%	NFKBIA/PEA15/FADD/TNFRSF10A/DFFB/HTRA2/TRAF3/FASLG/TNFRSF1B/FOS/PTPN13/MAP3K5/PRKD1/BIRC5/CDKN2A/CASP4/FAS/BAG3/BOK/IL1R1/BIRC3/PMAIP1/IL1R2/BCL2A1
WP_PROSTAGLANDIN_SYNTHESIS_AND_REGULATION	WP_PROSTAGLANDIN_SYNTHESIS_AND_REGULATION	WP_PROSTAGLANDIN_SYNTHESIS_AND_REGULATION	44	-0.400004	-1.27833	0.113744	0.358279	0.285544	1590	tags=32%, list=10%, signal=29%	PTGFR/ANXA2/PTGES/PTGIS/EDNRA/HPGD/PTGER2/AKR1B1/MITF/ANXA5/HSD11B1/ANXA1/PLA2G4A/PTGS2
WP_PHOSPHODIESTERASES_IN_NEURONAL_FUNCTION	WP_PHOSPHODIESTERASES_IN_NEURONAL_FUNCTION	WP_PHOSPHODIESTERASES_IN_NEURONAL_FUNCTION	49	0.421673	1.30426	0.113903	0.358279	0.285544	1079	tags=16%, list=7%, signal=15%	DRD2/PDE9A/PPP1R1B/PDE6A/PDE3B/PDE8A/ADCY6/PDE3A
REACTOME_ERYTHROCYTES_TAKE_UP_CARBON_DIOXIDE_AND_RELEASE_OXYGEN	REACTOME_ERYTHROCYTES_TAKE_UP_CARBON_DIOXIDE_AND_RELEASE_OXYGEN	REACTOME_ERYTHROCYTES_TAKE_UP_CARBON_DIOXIDE_AND_RELEASE_OXYGEN	11	0.618888	1.36993	0.113971	0.358279	0.285544	298	tags=18%, list=2%, signal=18%	CA4/CA1
REACTOME_FC_EPSILON_RECEPTOR_FCERI_SIGNALING	REACTOME_FC_EPSILON_RECEPTOR_FCERI_SIGNALING	REACTOME_FC_EPSILON_RECEPTOR_FCERI_SIGNALING	126	-0.308346	-1.18574	0.114362	0.358923	0.286057	3489	tags=39%, list=22%, signal=31%	PSMA5/MAP3K1/PSMC5/PSMD13/UBB/VAV1/NFKBIA/PSMB4/CHUK/PSMB2/PPP3CB/PSMB10/ITPR1/PSMD1/PSMD12/PSMA4/UBA52/PPP3CA/PSMD14/PSMA3/PSMA1/BTK/PPP3R1/PLCG2/ITK/MAP2K4/FOS/PSMD8/PSMB3/PSMD9/PSMC4/LAT2/MALT1/PSMD2/PSMC1/PSMC3/PSMB8/PSMB5/HRAS/PSME1/PSMC6/NFATC1/PSMB6/RASGRP1/LYN/PSMB9/LCP2/FYN/FCER1G
REACTOME_TRANSPORT_OF_THE_SLBP_DEPENDANT_MATURE_MRNA	REACTOME_TRANSPORT_OF_THE_SLBP_DEPENDANT_MATURE_MRNA	REACTOME_TRANSPORT_OF_THE_SLBP_DEPENDANT_MATURE_MRNA	34	-0.435172	-1.30962	0.114416	0.358923	0.286057	4067	tags=53%, list=25%, signal=40%	NUP98/NUP54/NUP93/NUP37/NUP43/NUP133/NUP205/NUP62/NUP160/NUP50/NUP35/NUP155/SEC13/NUP210/SLBP/NDC1/ALYREF/SEH1L
REACTOME_MRNA_CAPPING	REACTOME_MRNA_CAPPING	REACTOME_MRNA_CAPPING	28	-0.456734	-1.3168	0.114679	0.359367	0.286411	2042	tags=29%, list=13%, signal=25%	POLR2E/POLR2A/POLR2I/RNMT/POLR2G/RNGTT/POLR2L/MNAT1
REACTOME_NUCLEAR_EVENTS_KINASE_AND_TRANSCRIPTION_FACTOR_ACTIVATION	REACTOME_NUCLEAR_EVENTS_KINASE_AND_TRANSCRIPTION_FACTOR_ACTIVATION	REACTOME_NUCLEAR_EVENTS_KINASE_AND_TRANSCRIPTION_FACTOR_ACTIVATION	61	-0.363313	-1.24252	0.11509	0.360275	0.287135	2146	tags=25%, list=13%, signal=21%	VGF/RPS6KA2/FOS/MAPK11/NAB2/EGR3/ARC/NAB1/DUSP7/F3/DUSP6/EGR2/RRAD/FOSL1/DUSP4
REACTOME_SIGNALING_BY_ROBO_RECEPTORS	REACTOME_SIGNALING_BY_ROBO_RECEPTORS	REACTOME_SIGNALING_BY_ROBO_RECEPTORS	190	-0.289418	-1.16649	0.115493	0.361072	0.28777	3568	tags=33%, list=22%, signal=26%	PSMA5/RPS16/RPL10A/RBM8A/PSMC5/PSMD13/UBB/RBX1/RPL19/PSMB4/PSMB2/RPS8/PPP3CB/PSMB10/PSMD1/PSMD12/CAP1/RPL35/PSMA4/ETF1/UBA52/RPL8/RPS18/ROBO3/RPL27/RPL26L1/PSMD14/PSMA3/RPS12/PSMA1/FAU/RPL39L/ROBO1/PSMD8/PSMB3/SRGAP2/RPS5/EIF4A3/RPL41/PSMD9/PSMC4/MAGOHB/PSMD2/PSMC1/PSMC3/PSMB8/PAK6/GPC1/RPL36AL/PSMB5/EVL/PSME1/RPS4Y1/PSMC6/SLIT2/PSMB6/PFN1/CAP2/ISL1/RPL22L1/PSMB9/NRP1/CXCR4
WP_ENTEROCYTE_CHOLESTEROL_METABOLISM	WP_ENTEROCYTE_CHOLESTEROL_METABOLISM	WP_ENTEROCYTE_CHOLESTEROL_METABOLISM	35	0.459428	1.31241	0.115587	0.361072	0.28777	4465	tags=46%, list=28%, signal=33%	FABP2/DGAT1/MSMO1/EBP/HSD17B7/HMGCR/IDI1/FDFT1/APOA1/MVD/MVK/TM7SF2/LBR/NPC1L1/APOA4/ACAT2
REACTOME_GP1B_IX_V_ACTIVATION_SIGNALLING	REACTOME_GP1B_IX_V_ACTIVATION_SIGNALLING	REACTOME_GP1B_IX_V_ACTIVATION_SIGNALLING	11	-0.59759	-1.38088	0.115721	0.361111	0.287801	320	tags=36%, list=2%, signal=36%	VWF/FLNA/COL1A2/COL1A1
PID_IFNG_PATHWAY	PID_IFNG_PATHWAY	PID_IFNG_PATHWAY	40	-0.410395	-1.27972	0.116009	0.361117	0.287806	944	tags=22%, list=6%, signal=21%	PTPN2/AKT1/SOCS1/JAK2/IRF1/IFNG/DAPK1/STAT1/IL1B
WP_NETRIN_UNC5B_SIGNALING_PATHWAY	WP_NETRIN_UNC5B_SIGNALING_PATHWAY	WP_NETRIN_UNC5B_SIGNALING_PATHWAY	49	-0.392292	-1.28847	0.116049	0.361117	0.287806	3178	tags=37%, list=20%, signal=30%	MAP2K1/ROBO4/IL1A/IL10/PPP1CA/KDR/ALPL/TNF/DCSTAMP/AKT1/CDH5/VCAM1/SELE/DAPK1/ICAM1/FYN/COL1A1/CCL2
WP_3Q29_COPY_NUMBER_VARIATION_SYNDROME	WP_3Q29_COPY_NUMBER_VARIATION_SYNDROME	WP_3Q29_COPY_NUMBER_VARIATION_SYNDROME	55	0.404259	1.27599	0.116086	0.361117	0.287806	3056	tags=24%, list=19%, signal=19%	PIGZ/SLC51B/SLC40A1/JUN/SLC51A/DYNLRB1/CASP7/DLG1/NCBP2/BRINP1/TFRC/ZNF76/MYC
REACTOME_NEURONAL_SYSTEM	REACTOME_NEURONAL_SYSTEM	REACTOME_NEURONAL_SYSTEM	394	0.278918	1.14467	0.116348	0.361457	0.288076	2242	tags=15%, list=14%, signal=13%	ABAT/PTPRD/TSPAN7/GNG4/PRKACB/RPS6KA6/SLC1A7/KCNN4/PPFIBP2/MAOA/RPS6KA3/SYT7/KCNQ1/PRKAB1/SHANK2/NAAA/DNAJC5/SLITRK6/PRKAR2A/GABRA2/PTPRF/EPB41L1/ALDH2/KCNH8/ADCY6/SLC38A1/TUBAL3/ARHGEF9/EPB41L5/PLCB1/CACNA2D2/CASK/EPB41L2/KCNJ2/PPFIA3/GNG12/LIN7B/GRIP1/HCN3/PDPK1/CACNB2/SRC/SLC6A4/KCNK17/LIN7A/KCNG1/SYN3/SYT1/GLS/DLG1/PICK1/NRXN2/DLGAP4/UNC13B/PRKCA/NRXN3/GABRA4/EPB41/ADCY3/GNG13
REACTOME_SYNTHESIS_OF_PA	REACTOME_SYNTHESIS_OF_PA	REACTOME_SYNTHESIS_OF_PA	33	-0.437996	-1.30597	0.116438	0.361457	0.288076	972	tags=12%, list=6%, signal=11%	AGPAT4/LPCAT1/PLA2G4A/PLA2G2A
KEGG_MEDICUS_REFERENCE_ITGA_B_RHOGAP_RHOA_SIGNALING_PATHWAY	KEGG_MEDICUS_REFERENCE_ITGA_B_RHOGAP_RHOA_SIGNALING_PATHWAY	KEGG_MEDICUS_REFERENCE_ITGA_B_RHOGAP_RHOA_SIGNALING_PATHWAY	22	-0.491243	-1.32277	0.116972	0.362359	0.288796	3778	tags=59%, list=23%, signal=45%	RHOA/ITGB5/ITGB3/ITGB7/ITGB1/ITGA1/ITGA7/ITGA4/ITGA11/ITGAV/ITGA3/FN1/ITGA5
WP_PI3K_AKT_MTOR_VITAMIN_D3_SIGNALING	WP_PI3K_AKT_MTOR_VITAMIN_D3_SIGNALING	WP_PI3K_AKT_MTOR_VITAMIN_D3_SIGNALING	22	-0.493518	-1.3289	0.116972	0.362359	0.288796	2246	tags=36%, list=14%, signal=31%	LDHA/AKT1/CD80/PFKFB4/HK3/CD86/HLA-DRA/SLC2A3
WP_IL6_SIGNALING_PATHWAY	WP_IL6_SIGNALING_PATHWAY	WP_IL6_SIGNALING_PATHWAY	43	-0.396369	-1.26367	0.117096	0.362365	0.2888	883	tags=16%, list=5%, signal=15%	JAK2/IRF1/SOCS3/STAT1/TIMP1/HCK/IL6
WP_MALE_INFERTILITY	WP_MALE_INFERTILITY	WP_MALE_INFERTILITY	125	-0.312562	-1.20256	0.117333	0.362722	0.289085	2369	tags=22%, list=15%, signal=19%	NOS2/XRCC3/FASLG/NANOS1/THBS1/TNF/DND1/MTHFD1/PARP1/SIRPG/SIRPA/CYP26B1/SLC16A7/MSMB/HMGA1/PEMT/AHR/TRIP13/FAS/MMP2/SOD2/PSAT1/PIWIL1/ETV5/MMP9/HLA-DRA/SEMG1
REACTOME_HEDGEHOG_LIGAND_BIOGENESIS	REACTOME_HEDGEHOG_LIGAND_BIOGENESIS	REACTOME_HEDGEHOG_LIGAND_BIOGENESIS	60	-0.364117	-1.24211	0.118252	0.365182	0.291046	3568	tags=48%, list=22%, signal=38%	PSMA5/ADAM17/PSMC5/PSMD13/UBB/PSMB4/PSMB2/PSMB10/PSMD1/PSMD12/PSMA4/UBA52/PSMD14/PSMA3/PSMA1/P4HB/PSMD8/PSMB3/PSMD9/PSMC4/PSMD2/PSMC1/PSMC3/PSMB8/PSMB5/PSME1/PSMC6/PSMB6/PSMB9
REACTOME_HDMS_DEMETHYLATE_HISTONES	REACTOME_HDMS_DEMETHYLATE_HISTONES	REACTOME_HDMS_DEMETHYLATE_HISTONES	22	0.514176	1.34845	0.118375	0.365182	0.291046	4736	tags=59%, list=29%, signal=42%	KDM7A/KDM4C/KDM5C/PHF8/KDM6A/KDM4A/KDM3B/PHF2/KDM5B/KDM5A/KDM4B/KDM2A/KDM3A
BIOCARTA_AMAN_PATHWAY	BIOCARTA_AMAN_PATHWAY	BIOCARTA_AMAN_PATHWAY	15	0.569447	1.34949	0.119048	0.366249	0.291896	1753	tags=33%, list=11%, signal=30%	FUT6/MAN2C1/MAN2A2/B3GALT1/FUT7
REACTOME_GLYCEROPHOSPHOLIPID_BIOSYNTHESIS	REACTOME_GLYCEROPHOSPHOLIPID_BIOSYNTHESIS	REACTOME_GLYCEROPHOSPHOLIPID_BIOSYNTHESIS	111	0.34649	1.23927	0.119048	0.366249	0.291896	2884	tags=29%, list=18%, signal=24%	GPCPD1/PLA2G4F/CPNE7/GPD1L/SLC44A4/MGLL/SLC44A3/CHPT1/PCTP/CPNE1/CHKA/LPIN3/CRLS1/PLBD1/PLA2G12A/CDS1/CDS2/PLA2G6/DGAT1/SLC44A5/CPNE6/DGAT2/SLC44A1/STARD10/AGPAT2/HADHA/PLD1/PNPLA2/ETNK2/CHKB/CSNK2A1/ACHE
KEGG_MEDICUS_VARIANT_FZD7_OVEREXPRESSION_TO_WNT_SIGNALING_PATHWAY	KEGG_MEDICUS_VARIANT_FZD7_OVEREXPRESSION_TO_WNT_SIGNALING_PATHWAY	KEGG_MEDICUS_VARIANT_FZD7_OVEREXPRESSION_TO_WNT_SIGNALING_PATHWAY	35	0.457915	1.30809	0.119089	0.366249	0.291896	2371	tags=29%, list=15%, signal=24%	AXIN2/TCF7/AXIN1/WNT5B/FRAT2/LRP6/FRAT1/WNT4/TCF7L2/WNT2B
WP_TLR4_SIGNALING_AND_TOLERANCE	WP_TLR4_SIGNALING_AND_TOLERANCE	WP_TLR4_SIGNALING_AND_TOLERANCE	28	-0.453902	-1.30863	0.119266	0.366414	0.292027	3228	tags=32%, list=20%, signal=26%	NFKBIA/CHUK/IRAK3/TRAF3/TNF/TRAM1/IRF7/IL6/CXCL8
REACTOME_DEFECTIVE_B4GALT7_CAUSES_EDS_PROGEROID_TYPE	REACTOME_DEFECTIVE_B4GALT7_CAUSES_EDS_PROGEROID_TYPE	REACTOME_DEFECTIVE_B4GALT7_CAUSES_EDS_PROGEROID_TYPE	20	-0.500265	-1.32164	0.11991	0.368011	0.2933	1476	tags=35%, list=9%, signal=32%	CSPG4/GPC1/GPC6/SDC2/DCN/VCAN/BGN
WP_RALA_DOWNSTREAM_REGULATED_GENES	WP_RALA_DOWNSTREAM_REGULATED_GENES	WP_RALA_DOWNSTREAM_REGULATED_GENES	12	-0.588115	-1.38128	0.120087	0.368086	0.29336	2487	tags=50%, list=15%, signal=42%	EXOC2/YBX3/RALBP1/RAC2/HRAS/RAC3
WP_METABOLIC_PATHWAYS_OF_FIBROBLASTS	WP_METABOLIC_PATHWAYS_OF_FIBROBLASTS	WP_METABOLIC_PATHWAYS_OF_FIBROBLASTS	29	-0.448554	-1.29932	0.120181	0.368086	0.29336	3036	tags=48%, list=19%, signal=39%	CD36/PYCR1/PHGDH/LDHA/GPI/FGFR1/P4HA3/LOXL2/P4HA1/PLOD1/SERPINH1/PSAT1/SLC2A1/ADAMTS2
KEGG_MEDICUS_REFERENCE_ADRB3_UCP1_SIGNALING_PATHWAY	KEGG_MEDICUS_REFERENCE_ADRB3_UCP1_SIGNALING_PATHWAY	KEGG_MEDICUS_REFERENCE_ADRB3_UCP1_SIGNALING_PATHWAY	34	0.458942	1.30213	0.120354	0.368236	0.29348	4736	tags=53%, list=29%, signal=38%	PRKACB/PPARG/ADCY6/ADCY3/SMARCC2/ARID1B/KDM3B/GNAS/SMARCD2/ADCY5/SMARCC1/ARID1A/DPF3/SMARCA2/SMARCE1/PRKACG/ADCY9/KDM3A
WP_TYPE_2_PAPILLARY_RENAL_CELL_CARCINOMA	WP_TYPE_2_PAPILLARY_RENAL_CELL_CARCINOMA	WP_TYPE_2_PAPILLARY_RENAL_CELL_CARCINOMA	32	-0.432865	-1.28251	0.120729	0.369004	0.294092	2833	tags=31%, list=18%, signal=26%	EGLN3/ARNT2/PDGFB/EGLN1/TGFB2/TGFB3/HIF1A/SLC2A1/TGFB1/CTSK
REACTOME_SUMOYLATION_OF_UBIQUITINYLATION_PROTEINS	REACTOME_SUMOYLATION_OF_UBIQUITINYLATION_PROTEINS	REACTOME_SUMOYLATION_OF_UBIQUITINYLATION_PROTEINS	37	-0.415189	-1.27022	0.121212	0.370101	0.294966	4067	tags=51%, list=25%, signal=39%	NUP98/NUP54/NUP93/NUP37/NUP43/NUP133/NUP205/NUP62/NUP160/NUP50/MDM2/NUP35/NUP155/PML/SEC13/NUP210/PIAS2/NDC1/SEH1L
WP_HIPPO_SIGNALING_REGULATION_PATHWAYS	WP_HIPPO_SIGNALING_REGULATION_PATHWAYS	WP_HIPPO_SIGNALING_REGULATION_PATHWAYS	98	0.354712	1.23933	0.1216	0.370905	0.295607	3083	tags=28%, list=19%, signal=22%	PLCB4/CDH17/PRKACB/FGFR3/TCF7/CDH1/PRKAB1/NTRK2/FGFR4/PRKAR2A/PLCB1/EGFR/GNA11/PRKCD/IGF1R/SMAD3/PRKCZ/PRKCA/TCF7L2/TEAD2/MST1/PRKCQ/PRKCE/INSR/PRKAR1B/CDH22/PRKAA1
WP_MECHANOREGULATION_AND_PATHOLOGY_OF_YAP_TAZ_VIA_HIPPO_AND_NON_HIPPO_MECHANISMS	WP_MECHANOREGULATION_AND_PATHOLOGY_OF_YAP_TAZ_VIA_HIPPO_AND_NON_HIPPO_MECHANISMS	WP_MECHANOREGULATION_AND_PATHOLOGY_OF_YAP_TAZ_VIA_HIPPO_AND_NON_HIPPO_MECHANISMS	43	-0.394376	-1.25731	0.12178	0.371073	0.295741	3824	tags=47%, list=24%, signal=36%	MAP4K1/ACTA1/ITGB5/ACTG2/ITGB3/NF2/MAP4K5/ITGB7/ITGB1/ACTB/ACTA2/MAP4K4/STK3/PAK6/TEAD4/ACTC1/SAV1/WWTR1/SGMS1/ITGB2
REACTOME_EARLY_SARS_COV_2_INFECTION_EVENTS	REACTOME_EARLY_SARS_COV_2_INFECTION_EVENTS	REACTOME_EARLY_SARS_COV_2_INFECTION_EVENTS	35	0.45566	1.30165	0.122592	0.373166	0.297409	1738	tags=29%, list=11%, signal=26%	ACE2/HAVCR1/CHMP4B/TMPRSS2/GPC4/SDC4/CHMP4C/GPC2/SDC1/BECN1
REACTOME_FOXO_MEDIATED_TRANSCRIPTION_OF_OXIDATIVE_STRESS_METABOLIC_AND_NEURONAL_GENES	REACTOME_FOXO_MEDIATED_TRANSCRIPTION_OF_OXIDATIVE_STRESS_METABOLIC_AND_NEURONAL_GENES	REACTOME_FOXO_MEDIATED_TRANSCRIPTION_OF_OXIDATIVE_STRESS_METABOLIC_AND_NEURONAL_GENES	29	0.484298	1.32748	0.122995	0.374009	0.298081	870	tags=17%, list=5%, signal=16%	PCK1/FOXO3/PPARGC1A/FOXO4/CAT
KEGG_MEDICUS_REFERENCE_KISS1_KISS1R_PLCB_PKC_SIGNALING_PATHWAY	KEGG_MEDICUS_REFERENCE_KISS1_KISS1R_PLCB_PKC_SIGNALING_PATHWAY	KEGG_MEDICUS_REFERENCE_KISS1_KISS1R_PLCB_PKC_SIGNALING_PATHWAY	11	0.615638	1.36274	0.123162	0.374135	0.298181	2064	tags=36%, list=13%, signal=32%	PLCB4/PLCB1/GNA11/PRKCA
WP_GENES_RELATED_TO_PRIMARY_CILIUM_DEVELOPMENT_BASED_ON_CRISPR	WP_GENES_RELATED_TO_PRIMARY_CILIUM_DEVELOPMENT_BASED_ON_CRISPR	WP_GENES_RELATED_TO_PRIMARY_CILIUM_DEVELOPMENT_BASED_ON_CRISPR	87	-0.328631	-1.19769	0.123626	0.375087	0.29894	3326	tags=37%, list=21%, signal=29%	IFT20/IFT81/CEP120/ARL3/TMEM67/WDR19/BBS4/TMEM17/EVC2/SASS6/CLUAP1/DYNLT1/CEP192/TTC26/CEP97/TXNDC15/IFT43/EVC/BBS12/BBS7/KIF3A/ARL6/MIB1/ARMC9/TTC8/CEP19/B9D1/TMEM107/ARL13B/TMEM231/CEP76/RAB23
REACTOME_TRANSPORT_OF_INORGANIC_CATIONS_ANIONS_AND_AMINO_ACIDS_OLIGOPEPTIDES	REACTOME_TRANSPORT_OF_INORGANIC_CATIONS_ANIONS_AND_AMINO_ACIDS_OLIGOPEPTIDES	REACTOME_TRANSPORT_OF_INORGANIC_CATIONS_ANIONS_AND_AMINO_ACIDS_OLIGOPEPTIDES	103	0.353808	1.24433	0.123794	0.375087	0.29894	1077	tags=14%, list=7%, signal=13%	SLC26A3/SLC26A2/SLC38A4/SLC1A7/SLC3A1/SLC9A3/SLC9A2/SLC6A6/SRI/SLC9A8/SLC38A1/SLC12A2/SLC36A1/SLC38A3
WP_DNA_MISMATCH_REPAIR	WP_DNA_MISMATCH_REPAIR	WP_DNA_MISMATCH_REPAIR	22	-0.487757	-1.31338	0.123853	0.375087	0.29894	4730	tags=77%, list=29%, signal=55%	RPA3/POLE4/LIG1/PCNA/MSH2/POLE3/POLD2/RFC1/POLD1/MSH6/RFC5/RFC4/RFC2/RPA1/RPA2/EXO1/POLE2
REACTOME_L1CAM_INTERACTIONS	REACTOME_L1CAM_INTERACTIONS	REACTOME_L1CAM_INTERACTIONS	112	-0.311864	-1.18655	0.123989	0.375118	0.298964	2634	tags=27%, list=16%, signal=23%	KIF4A/RPS6KA2/ITGB1/AP2B1/L1CAM/ACTB/ITGA1/EZR/LAMC1/TUBB3/TUBA4A/AP2S1/FGFR1/TUBA1C/CNTNAP1/ITGAV/AP2M1/TUBB2B/TUBA1B/ALCAM/RDX/MSN/TUBA1A/DNM1/TUBB2A/NRP2/DPYSL2/NRP1/ITGA5/TUBB6
REACTOME_CYCLIN_A_B1_B2_ASSOCIATED_EVENTS_DURING_G2_M_TRANSITION	REACTOME_CYCLIN_A_B1_B2_ASSOCIATED_EVENTS_DURING_G2_M_TRANSITION	REACTOME_CYCLIN_A_B1_B2_ASSOCIATED_EVENTS_DURING_G2_M_TRANSITION	24	-0.471203	-1.30717	0.124424	0.376051	0.299708	1488	tags=38%, list=9%, signal=34%	CDC25B/PPP2CA/CDK2/CDK1/CCNA2/FOXM1/PLK1/MNAT1/CCNB1
BIOCARTA_CFTR_PATHWAY	BIOCARTA_CFTR_PATHWAY	BIOCARTA_CFTR_PATHWAY	10	0.64001	1.37115	0.125	0.377026	0.300485	719	tags=30%, list=4%, signal=29%	CFTR/PRKACB/PRKAR2A
REACTOME_NEUROTRANSMITTER_CLEARANCE	REACTOME_NEUROTRANSMITTER_CLEARANCE	REACTOME_NEUROTRANSMITTER_CLEARANCE	10	0.639324	1.36968	0.125	0.377026	0.300485	3325	tags=50%, list=21%, signal=40%	MAOA/ALDH2/SLC6A4/ACHE/COMT
BIOCARTA_PML_PATHWAY	BIOCARTA_PML_PATHWAY	BIOCARTA_PML_PATHWAY	17	-0.50871	-1.31293	0.126106	0.379978	0.302838	2512	tags=41%, list=16%, signal=35%	SP100/PML/FASLG/TNFRSF1B/TNF/HRAS/FAS
KEGG_ARGININE_AND_PROLINE_METABOLISM	KEGG_ARGININE_AND_PROLINE_METABOLISM	KEGG_ARGININE_AND_PROLINE_METABOLISM	48	0.417566	1.2829	0.126263	0.380065	0.302907	1840	tags=25%, list=11%, signal=22%	CKB/AOC1/MAOA/ALDH1B1/ASL/ALDH2/GATM/AGMAT/OTC/CKMT2/ALDH18A1/GLS
KEGG_MEDICUS_REFERENCE_WNT_SIGNALING_MODULATION_LGR_RSPO	KEGG_MEDICUS_REFERENCE_WNT_SIGNALING_MODULATION_LGR_RSPO	KEGG_MEDICUS_REFERENCE_WNT_SIGNALING_MODULATION_LGR_RSPO	18	0.538194	1.34922	0.12656	0.380574	0.303313	2232	tags=33%, list=14%, signal=29%	RNF43/LGR5/ZNRF3/FZD5/FZD9/FZD10
KEGG_MEDICUS_REFERENCE_BLOCKING_UBIQUITINATION_OF_H2AK119_BY_CK2	KEGG_MEDICUS_REFERENCE_BLOCKING_UBIQUITINATION_OF_H2AK119_BY_CK2	KEGG_MEDICUS_REFERENCE_BLOCKING_UBIQUITINATION_OF_H2AK119_BY_CK2	12	0.604925	1.36534	0.126838	0.381027	0.303673	2821	tags=50%, list=17%, signal=41%	AUTS2/FBRS/DCAF7/PCGF5/RYBP/CSNK2A1
BIOCARTA_ACE2_PATHWAY	BIOCARTA_ACE2_PATHWAY	BIOCARTA_ACE2_PATHWAY	13	0.594009	1.363	0.128205	0.384539	0.306473	1484	tags=31%, list=9%, signal=28%	ACE2/AGT/REN/COL4A5
REACTOME_PHOSPHORYLATION_OF_THE_APC_C	REACTOME_PHOSPHORYLATION_OF_THE_APC_C	REACTOME_PHOSPHORYLATION_OF_THE_APC_C	19	-0.503637	-1.33731	0.128319	0.384539	0.306473	3720	tags=47%, list=23%, signal=37%	ANAPC11/CDC23/ANAPC10/CDK1/UBE2E1/PLK1/CDC27/CCNB1/UBE2S
PID_ANGIOPOIETIN_RECEPTOR_PATHWAY	PID_ANGIOPOIETIN_RECEPTOR_PATHWAY	PID_ANGIOPOIETIN_RECEPTOR_PATHWAY	49	-0.383741	-1.26038	0.128395	0.384539	0.306473	3525	tags=37%, list=22%, signal=29%	CRK/FES/GRB14/TEK/ANGPT1/AGTR1/ITGB1/RPS6KB1/ANGPT2/TNF/AKT1/ETS1/FGF2/DOK2/MMP2/FN1/ITGA5/FYN
WP_MITOCHONDRIAL_IMMUNE_RESPONSE_TO_SARS_COV_2	WP_MITOCHONDRIAL_IMMUNE_RESPONSE_TO_SARS_COV_2	WP_MITOCHONDRIAL_IMMUNE_RESPONSE_TO_SARS_COV_2	28	0.4862	1.32978	0.128975	0.385889	0.307549	1042	tags=18%, list=6%, signal=17%	ACE2/NOX1/MAVS/TMPRSS2/REN
REACTOME_TRANSPORT_OF_MATURE_MRNAS_DERIVED_FROM_INTRONLESS_TRANSCRIPTS	REACTOME_TRANSPORT_OF_MATURE_MRNAS_DERIVED_FROM_INTRONLESS_TRANSCRIPTS	REACTOME_TRANSPORT_OF_MATURE_MRNAS_DERIVED_FROM_INTRONLESS_TRANSCRIPTS	40	-0.405191	-1.26349	0.12993	0.388356	0.309515	4626	tags=52%, list=29%, signal=38%	NUP98/NUP54/CPSF3/FIP1L1/NUP93/NUP37/NUP43/NUP133/NUP205/NUP62/NUP160/NUP50/NUP35/NUP155/SEC13/NUP210/SLBP/CPSF2/NDC1/ALYREF/SEH1L
REACTOME_KINESINS	REACTOME_KINESINS	REACTOME_KINESINS	55	-0.362215	-1.21868	0.130326	0.389147	0.310146	2949	tags=38%, list=18%, signal=31%	RACGAP1/CENPE/KIF4A/KIF1B/KIF18B/TUBB3/TUBA4A/KIF11/KIF3A/TUBA1C/KIF18A/TUBB2B/KLC1/KIF26B/TUBA1B/KIF2C/TUBA1A/KIF20A/KLC2/TUBB2A/TUBB6
WP_MAMMARY_GLAND_DEVELOPMENT_PATHWAY_INVOLUTION_STAGE_4_OF_4	WP_MAMMARY_GLAND_DEVELOPMENT_PATHWAY_INVOLUTION_STAGE_4_OF_4	WP_MAMMARY_GLAND_DEVELOPMENT_PATHWAY_INVOLUTION_STAGE_4_OF_4	10	-0.598528	-1.34962	0.130901	0.38961	0.310515	593	tags=30%, list=4%, signal=29%	SOCS3/MMP9/CHI3L1
BIOCARTA_CHREBP_PATHWAY	BIOCARTA_CHREBP_PATHWAY	BIOCARTA_CHREBP_PATHWAY	19	0.530487	1.33207	0.130909	0.38961	0.310515	3418	tags=42%, list=21%, signal=33%	PRKACB/PRKAB1/MLXIPL/PRKAR2A/PRKAR1B/PRKAA1/ACSM1/GNAS
PID_RXR_VDR_PATHWAY	PID_RXR_VDR_PATHWAY	PID_RXR_VDR_PATHWAY	26	0.490972	1.31913	0.130973	0.38961	0.310515	3060	tags=46%, list=19%, signal=37%	PPARG/PPARA/VDR/NR1H4/NR4A1/BCL2/THRB/RXRA/RARG/NCOR2/THRA/RARA
REACTOME_SPECIFICATION_OF_PRIMORDIAL_GERM_CELLS	REACTOME_SPECIFICATION_OF_PRIMORDIAL_GERM_CELLS	REACTOME_SPECIFICATION_OF_PRIMORDIAL_GERM_CELLS	11	-0.584087	-1.34968	0.131004	0.38961	0.310515	1700	tags=55%, list=11%, signal=49%	SOX17/BMP4/EOMES/TFAP2C/PDPN/CXCR4
BIOCARTA_IL3_PATHWAY	BIOCARTA_IL3_PATHWAY	BIOCARTA_IL3_PATHWAY	15	-0.528043	-1.3199	0.131579	0.390929	0.311565	2204	tags=40%, list=14%, signal=35%	MAP2K1/IL3RA/FOS/HRAS/JAK2/CSF2RB
REACTOME_SMOOTH_MUSCLE_CONTRACTION	REACTOME_SMOOTH_MUSCLE_CONTRACTION	REACTOME_SMOOTH_MUSCLE_CONTRACTION	40	-0.402776	-1.25596	0.132251	0.39243	0.312762	3680	tags=48%, list=23%, signal=37%	GUCY1A2/ITGB5/ACTG2/TPM3/PDE5A/MYL12B/TPM4/DYSF/TPM2/ACTA2/ITGA1/VCL/MYL12A/MYL9/ANXA2/LMOD1/TRIM72/CALD1/ANXA1
REACTOME_SYNTHESIS_OF_PC	REACTOME_SYNTHESIS_OF_PC	REACTOME_SYNTHESIS_OF_PC	28	0.484951	1.32637	0.132509	0.39243	0.312762	2884	tags=43%, list=18%, signal=35%	SLC44A4/SLC44A3/CHPT1/PCTP/CHKA/LPIN3/SLC44A5/SLC44A1/STARD10/CHKB/CSNK2A1/ACHE
REACTOME_VITAMIN_B5_PANTOTHENATE_METABOLISM	REACTOME_VITAMIN_B5_PANTOTHENATE_METABOLISM	REACTOME_VITAMIN_B5_PANTOTHENATE_METABOLISM	19	0.52677	1.32274	0.132727	0.39243	0.312762	974	tags=21%, list=6%, signal=20%	ENPP3/PANK1/SLC5A6/PANK3
BIOCARTA_IL12_PATHWAY	BIOCARTA_IL12_PATHWAY	BIOCARTA_IL12_PATHWAY	19	-0.500347	-1.32857	0.132743	0.39243	0.312762	2904	tags=63%, list=18%, signal=52%	STAT4/CD3G/IL12RB1/IL12RB2/CD3E/CD3D/CD247/IL18/JAK2/CCR5/IFNG/ETV5
WP_METABOLIC_PATHWAY_OF_LDL_HDL_AND_TG_INCLUDING_DISEASES	WP_METABOLIC_PATHWAY_OF_LDL_HDL_AND_TG_INCLUDING_DISEASES	WP_METABOLIC_PATHWAY_OF_LDL_HDL_AND_TG_INCLUDING_DISEASES	17	-0.505613	-1.30494	0.132743	0.39243	0.312762	2253	tags=35%, list=14%, signal=30%	CETP/LIPG/ANXA2/APOA2/PCSK9/APOE
WP_FATTY_ACIDS_AND_LIPOPROTEINS_TRANSPORT_IN_HEPATOCYTES	WP_FATTY_ACIDS_AND_LIPOPROTEINS_TRANSPORT_IN_HEPATOCYTES	WP_FATTY_ACIDS_AND_LIPOPROTEINS_TRANSPORT_IN_HEPATOCYTES	35	0.452325	1.29212	0.1331	0.392963	0.313187	1220	tags=26%, list=8%, signal=24%	FABP1/ACSL5/ACSL6/FABP2/MYLIP/LRP1/SLC27A2/SORT1/DBI
KEGG_MEDICUS_PATHOGEN_HCMV_US28_TO_GNA12_13_RHO_SIGNALING_PATHWAY	KEGG_MEDICUS_PATHOGEN_HCMV_US28_TO_GNA12_13_RHO_SIGNALING_PATHWAY	KEGG_MEDICUS_PATHOGEN_HCMV_US28_TO_GNA12_13_RHO_SIGNALING_PATHWAY	12	-0.573282	-1.34645	0.133188	0.392963	0.313187	296	tags=42%, list=2%, signal=41%	GNA12/CX3CL1/CCL5/CCL2/CCL4
REACTOME_TRAFFICKING_AND_PROCESSING_OF_ENDOSOMAL_TLR	REACTOME_TRAFFICKING_AND_PROCESSING_OF_ENDOSOMAL_TLR	REACTOME_TRAFFICKING_AND_PROCESSING_OF_ENDOSOMAL_TLR	13	-0.561358	-1.34209	0.133772	0.394296	0.314249	1267	tags=69%, list=8%, signal=64%	CNPY3/TLR7/UNC93B1/HSP90B1/CTSB/LGMN/TLR8/CTSK/CTSL
REACTOME_TERMINATION_OF_O_GLYCAN_BIOSYNTHESIS	REACTOME_TERMINATION_OF_O_GLYCAN_BIOSYNTHESIS	REACTOME_TERMINATION_OF_O_GLYCAN_BIOSYNTHESIS	21	0.504835	1.31437	0.134513	0.395867	0.315501	349	tags=19%, list=2%, signal=19%	MUC12/MUC20/ST6GAL1/MUC13
BIOCARTA_FMLP_PATHWAY	BIOCARTA_FMLP_PATHWAY	BIOCARTA_FMLP_PATHWAY	31	-0.435135	-1.273	0.134571	0.395867	0.315501	1213	tags=19%, list=8%, signal=18%	HRAS/NCF1/NFATC1/GNA15/FPR1/NCF2
WP_P38_MAPK_SIGNALING_PATHWAY	WP_P38_MAPK_SIGNALING_PATHWAY	WP_P38_MAPK_SIGNALING_PATHWAY	34	-0.424576	-1.27773	0.135011	0.396771	0.316222	3126	tags=35%, list=19%, signal=29%	HMGN1/MAX/MAPKAPK2/MAP3K9/MAP2K4/TGFB2/MAP3K5/TGFBR1/HSPB1/HRAS/STAT1/PLA2G4A
REACTOME_REGULATION_OF_CDH11_GENE_TRANSCRIPTION	REACTOME_REGULATION_OF_CDH11_GENE_TRANSCRIPTION	REACTOME_REGULATION_OF_CDH11_GENE_TRANSCRIPTION	10	-0.594709	-1.34101	0.135193	0.396913	0.316335	3373	tags=50%, list=21%, signal=40%	BHLHE22/PRDM8/SNAI1/ZEB2/CDH11
WP_10Q22Q23_COPY_NUMBER_VARIATION	WP_10Q22Q23_COPY_NUMBER_VARIATION	WP_10Q22Q23_COPY_NUMBER_VARIATION	53	0.404928	1.26465	0.136667	0.400844	0.319468	1626	tags=13%, list=10%, signal=12%	CDHR1/PPARG/CEBPA/MAT1A/TNFSF11/VEGFA/GPR15
KEGG_NICOTINATE_AND_NICOTINAMIDE_METABOLISM	KEGG_NICOTINATE_AND_NICOTINAMIDE_METABOLISM	KEGG_NICOTINATE_AND_NICOTINAMIDE_METABOLISM	23	0.497969	1.31383	0.137011	0.401457	0.319957	2772	tags=35%, list=17%, signal=29%	ENPP3/QPRT/NUDT12/NADSYN1/NT5C3A/NMNAT3/ENPP1/NMNAT1
REACTOME_BLOOD_GROUP_SYSTEMS_BIOSYNTHESIS	REACTOME_BLOOD_GROUP_SYSTEMS_BIOSYNTHESIS	REACTOME_BLOOD_GROUP_SYSTEMS_BIOSYNTHESIS	20	0.510601	1.30354	0.1375	0.402369	0.320683	1923	tags=30%, list=12%, signal=26%	FUT6/FUT3/B4GALNT2/B3GALT1/FUT7/FUT2
REACTOME_SENESCENCE_ASSOCIATED_SECRETORY_PHENOTYPE_SASP	REACTOME_SENESCENCE_ASSOCIATED_SECRETORY_PHENOTYPE_SASP	REACTOME_SENESCENCE_ASSOCIATED_SECRETORY_PHENOTYPE_SASP	51	-0.375246	-1.24798	0.137592	0.402369	0.320683	3437	tags=31%, list=21%, signal=25%	UBB/CDC23/ANAPC10/IL1A/UBA52/UBE2E1/CDKN2C/RPS6KA2/FOS/CCNA2/CDC27/IGFBP7/CDKN2A/UBE2S/IL6/CXCL8
WP_16P11_2_PROXIMAL_DELETION_SYNDROME	WP_16P11_2_PROXIMAL_DELETION_SYNDROME	WP_16P11_2_PROXIMAL_DELETION_SYNDROME	67	0.377391	1.23608	0.137763	0.402475	0.320767	3849	tags=36%, list=24%, signal=27%	QPRT/ZG16/PPARG/MAP2K6/PARP4/KMT2C/GDPD3/IGBP1/UNC13B/KMT2D/MAPK3/SIAH1/TRAF6/REL/TBX6/MVP/CASP8/MAZ/BPTF/PPP4R2/PAGR1/SEZ6L2/TMEM219/SPN
KEGG_MEDICUS_REFERENCE_PDGF_PDGFR_PI3K_SIGNALING_PATHWAY	KEGG_MEDICUS_REFERENCE_PDGF_PDGFR_PI3K_SIGNALING_PATHWAY	KEGG_MEDICUS_REFERENCE_PDGF_PDGFR_PI3K_SIGNALING_PATHWAY	13	-0.556857	-1.33133	0.138158	0.402836	0.321056	2443	tags=46%, list=15%, signal=39%	PDGFB/RPS6KB1/AKT1/PIK3CD/AKT3/PDGFRB
REACTOME_MRNA_DECAY_BY_3_TO_5_EXORIBONUCLEASE	REACTOME_MRNA_DECAY_BY_3_TO_5_EXORIBONUCLEASE	REACTOME_MRNA_DECAY_BY_3_TO_5_EXORIBONUCLEASE	13	-0.555753	-1.32869	0.138158	0.402836	0.321056	3978	tags=54%, list=25%, signal=41%	EXOSC2/EXOSC8/EXOSC3/HBS1L/EXOSC4/EXOSC9/DCPS
REACTOME_REGULATION_OF_NF_KAPPA_B_SIGNALING	REACTOME_REGULATION_OF_NF_KAPPA_B_SIGNALING	REACTOME_REGULATION_OF_NF_KAPPA_B_SIGNALING	18	-0.50375	-1.3096	0.138322	0.40292	0.321122	1142	tags=39%, list=7%, signal=36%	UBB/CHUK/UBA52/USP14/NLRC5/USP18/IKBIP
REACTOME_PHASE_0_RAPID_DEPOLARISATION	REACTOME_PHASE_0_RAPID_DEPOLARISATION	REACTOME_PHASE_0_RAPID_DEPOLARISATION	32	0.459886	1.28427	0.138544	0.403171	0.321322	6301	tags=50%, list=39%, signal=31%	CACNA2D2/CACNB2/SCN8A/CAMK2D/CAMK2G/CACNG4/SCN4A/SCN3A/CACNB1/FGF13/CALM1/CACNG6/SCN4B/SCN2B/CAMK2A/CAMK2B
PID_PDGFRB_PATHWAY	PID_PDGFRB_PATHWAY	PID_PDGFRB_PATHWAY	124	-0.3079	-1.1837	0.139037	0.404213	0.322153	2443	tags=23%, list=15%, signal=19%	PDGFB/PIK3R3/ACTA2/PIK3CG/MAP2K4/FOS/PTPN2/PIK3CD/YWHAE/S1PR1/BAIAP2/ITGAV/SFN/PIK3R5/HRAS/DOCK4/PDGFRB/JAK2/TAGLN/LYN/SLA/STAT1/FGR/HCK/FYN/LCK/SPHK1/PLA2G4A
REACTOME_O_GLYCOSYLATION_OF_TSR_DOMAIN_CONTAINING_PROTEINS	REACTOME_O_GLYCOSYLATION_OF_TSR_DOMAIN_CONTAINING_PROTEINS	REACTOME_O_GLYCOSYLATION_OF_TSR_DOMAIN_CONTAINING_PROTEINS	35	-0.421916	-1.26789	0.139211	0.404323	0.322241	2265	tags=26%, list=14%, signal=22%	SBSPON/ADAMTS5/THBS1/ADAMTSL4/ADAMTS1/ADAMTS12/ADAMTS2/SPON1/THBS2
REACTOME_RHO_GTPASE_CYCLE	REACTOME_RHO_GTPASE_CYCLE	REACTOME_RHO_GTPASE_CYCLE	429	0.272315	1.12866	0.139568	0.404966	0.322753	2830	tags=24%, list=18%, signal=20%	VAV3/NOX1/CKB/CFTR/PLEKHG6/CHN2/FARP1/ARHGAP44/VANGL2/FAM13A/MUC13/RHOU/DNMBP/STK38/ROCK2/CYFIP2/NOXA1/NGEF/PIK3R1/SPATA13/DIAPH2/ADD3/NCK2/RHPN2/ARHGEF10L/MPP7/VAPB/SOWAHC/ARHGEF5/MCF2L/OPHN1/PLXNB1/OCRL/ARHGEF9/BAIAP2L1/SH3BP1/FNBP1L/USP9X/KALRN/ARHGAP33/ARHGEF40/ARAP1/ARHGEF19/ABR/JUP/ARHGAP18/SRC/SOS2/FARP2/FAM135A/DSP/STMN2/PTK2B/TMEM87A/SRGAP3/ARHGEF1/LEMD3/FNBP1/ARHGEF18/PLEKHG5/STARD13/AR…
KEGG_MEDICUS_REFERENCE_KITLG_KIT_PI3K_SIGNALING_PATHWAY	KEGG_MEDICUS_REFERENCE_KITLG_KIT_PI3K_SIGNALING_PATHWAY	KEGG_MEDICUS_REFERENCE_KITLG_KIT_PI3K_SIGNALING_PATHWAY	11	-0.573274	-1.32469	0.139738	0.405063	0.32283	2373	tags=45%, list=15%, signal=39%	RPS6KB1/AKT1/PIK3CD/AKT3/KITLG
KEGG_MEDICUS_REFERENCE_CXCR_GNB_G_ERK_SIGNALING_PATHWAY	KEGG_MEDICUS_REFERENCE_CXCR_GNB_G_ERK_SIGNALING_PATHWAY	KEGG_MEDICUS_REFERENCE_CXCR_GNB_G_ERK_SIGNALING_PATHWAY	27	-0.444247	-1.26552	0.141204	0.408914	0.325899	1716	tags=26%, list=11%, signal=23%	GNG10/GNB5/HRAS/GNG11/GNB4/CXCR2/CXCL8
WP_TAR_SYNDROME	WP_TAR_SYNDROME	WP_TAR_SYNDROME	56	-0.358458	-1.20714	0.142857	0.4133	0.329395	2754	tags=30%, list=17%, signal=25%	HLA-E/HLA-C/HAMP/ITGB1/MTA1/EIF4A3/HLA-F/CD3D/POLR3GL/CD247/DDIT4/IFNG/DNM1/PIAS3/POLR3G/LCK/CXCR4
WP_IL_3_SIGNALING_PATHWAY	WP_IL_3_SIGNALING_PATHWAY	WP_IL_3_SIGNALING_PATHWAY	49	-0.374465	-1.22992	0.14321	0.413918	0.329888	1213	tags=29%, list=8%, signal=27%	IL3RA/FOS/AKT1/PIK3CD/HRAS/JAK2/LYN/TGFB1/CD69/CD86/HCK/CSF2RB/FYN/CXCL8
WP_HOST_PATHOGEN_INTERACTION_OF_HUMAN_CORONAVIRUSES_AUTOPHAGY	WP_HOST_PATHOGEN_INTERACTION_OF_HUMAN_CORONAVIRUSES_AUTOPHAGY	WP_HOST_PATHOGEN_INTERACTION_OF_HUMAN_CORONAVIRUSES_AUTOPHAGY	19	0.519391	1.30421	0.143636	0.414748	0.330549	2254	tags=21%, list=14%, signal=18%	MAP1LC3A/WIPI1/BECN1/RB1CC1
REACTOME_SYNTHESIS_OF_PIPS_AT_THE_PLASMA_MEMBRANE	REACTOME_SYNTHESIS_OF_PIPS_AT_THE_PLASMA_MEMBRANE	REACTOME_SYNTHESIS_OF_PIPS_AT_THE_PLASMA_MEMBRANE	50	0.405735	1.25413	0.144068	0.415591	0.331221	4667	tags=44%, list=29%, signal=31%	INPP5J/INPP5D/PIP5K1B/PIK3R1/PLEKHA6/OCRL/PIK3C2B/PLEKHA5/PLEKHA1/SYNJ2/MTM1/PIK3CB/MTMR3/MTMR14/SBF2/BMX/PLEKHA8/PIK3C2A/PLEKHA2/RAB5A/RAB14/PIK3R2
PID_RETINOIC_ACID_PATHWAY	PID_RETINOIC_ACID_PATHWAY	PID_RETINOIC_ACID_PATHWAY	30	0.464615	1.28964	0.144366	0.416049	0.331585	3060	tags=40%, list=19%, signal=32%	VDR/NCOA3/NRIP1/CREBBP/PRKCA/RXRA/NCOA2/MAPK3/RARG/RBP1/NCOR2/RARA
KEGG_MEDICUS_REFERENCE_IFN_RIPK1_3_SIGNALING_PATHWAY	KEGG_MEDICUS_REFERENCE_IFN_RIPK1_3_SIGNALING_PATHWAY	KEGG_MEDICUS_REFERENCE_IFN_RIPK1_3_SIGNALING_PATHWAY	29	-0.43801	-1.26878	0.145125	0.417129	0.332446	3551	tags=31%, list=22%, signal=24%	IFNGR1/IFNAR2/STAT4/IRF9/JAK3/STAT2/JAK2/IFNG/STAT1
REACTOME_HSF1_ACTIVATION	REACTOME_HSF1_ACTIVATION	REACTOME_HSF1_ACTIVATION	29	-0.438084	-1.269	0.145125	0.417129	0.332446	3870	tags=55%, list=24%, signal=42%	EEF1A1/HSBP1/PTGES3/DNAJB6/UBB/HSP90AB1/MRPL18/HSPB2/FKBP4/YWHAE/RPA1/RPA2/HSPB1/HSP90AA1/SERPINH1/HSPA6
REACTOME_RHO_GTPASES_ACTIVATE_NADPH_OXIDASES	REACTOME_RHO_GTPASES_ACTIVATE_NADPH_OXIDASES	REACTOME_RHO_GTPASES_ACTIVATE_NADPH_OXIDASES	24	-0.461851	-1.28123	0.145161	0.417129	0.332446	1278	tags=25%, list=8%, signal=23%	RAC2/NCF1/CYBB/S100A9/S100A8/NCF2
WP_GPR143_IN_MELANOCYTES_AND_RETINAL_PIGMENT_EPITHELIUM_CELLS	WP_GPR143_IN_MELANOCYTES_AND_RETINAL_PIGMENT_EPITHELIUM_CELLS	WP_GPR143_IN_MELANOCYTES_AND_RETINAL_PIGMENT_EPITHELIUM_CELLS	30	0.462156	1.28281	0.146127	0.419083	0.334004	1513	tags=17%, list=9%, signal=15%	PLCB4/PRKACB/GPR143/PLCB1/VEGFA
WP_MARKERS_OF_KIDNEY_CELL_LINEAGE	WP_MARKERS_OF_KIDNEY_CELL_LINEAGE	WP_MARKERS_OF_KIDNEY_CELL_LINEAGE	58	-0.356334	-1.20627	0.146154	0.419083	0.334004	2890	tags=38%, list=18%, signal=31%	RARB/EGLN3/SIX1/KDR/AP2B1/EGLN1/ACTA2/CITED1/BMP4/WNT5A/FGF7/OSR1/PDGFRB/PECAM1/KCTD1/DES/RSPO3/DCN/TGFB1/NT5E/FOXD1/TNC
WP_GLIOBLASTOMA_SIGNALING_PATHWAYS	WP_GLIOBLASTOMA_SIGNALING_PATHWAYS	WP_GLIOBLASTOMA_SIGNALING_PATHWAYS	81	0.359718	1.21291	0.146264	0.419083	0.334004	2647	tags=30%, list=16%, signal=25%	MAP2K6/FOXO3/PIK3R1/PLCG1/FOXO4/ERBB3/CCND2/GAB1/PIK3C2B/EGFR/PDPK1/SRC/PRKCD/IGF1R/MAP2K5/PRKCZ/CDKN1B/TSC2/PRKCA/E2F1/PIK3CB/MAPK3/PRKCQ/ERBB2
WP_AMP_ACTIVATED_PROTEIN_KINASE_SIGNALING	WP_AMP_ACTIVATED_PROTEIN_KINASE_SIGNALING	WP_AMP_ACTIVATED_PROTEIN_KINASE_SIGNALING	64	0.37838	1.22877	0.14658	0.419585	0.334404	4175	tags=36%, list=26%, signal=27%	PRKACB/HNF4A/PRKAB1/PIK3R1/ACACB/PLCB1/STRADB/PPARGC1B/STK11/TSC2/PIK3CB/ADIPOR2/INSR/HMGCR/CPT1A/PRKAA1/CAMKK1/SLC2A4/TSC1/LIPE/SLC2A4RG/CAMKK2/CAB39
REACTOME_RECRUITMENT_OF_MITOTIC_CENTROSOME_PROTEINS_AND_COMPLEXES	REACTOME_RECRUITMENT_OF_MITOTIC_CENTROSOME_PROTEINS_AND_COMPLEXES	REACTOME_RECRUITMENT_OF_MITOTIC_CENTROSOME_PROTEINS_AND_COMPLEXES	76	-0.335699	-1.20697	0.147287	0.421204	0.335694	3728	tags=39%, list=23%, signal=31%	TUBB4B/CKAP5/HAUS3/PAFAH1B1/DYNLL1/CETN2/ODF2/HAUS6/ACTR1A/SDCCAG8/CDK1/HAUS8/CEP78/CEP192/NEDD1/PLK4/CEP135/TUBA4A/YWHAE/TUBG2/TUBB/PLK1/MZT1/NEK2/TUBG1/HSP90AA1/HAUS1/TUBA1A/CEP76/PRKAR2B
REACTOME_INTERLEUKIN_35_SIGNALLING	REACTOME_INTERLEUKIN_35_SIGNALLING	REACTOME_INTERLEUKIN_35_SIGNALLING	12	-0.565088	-1.3272	0.148472	0.424184	0.33807	3573	tags=58%, list=22%, signal=45%	CANX/IL6ST/STAT4/IL27RA/IL12RB2/JAK2/STAT1
WP_10Q11_21Q11_23_COPY_NUMBER_VARIATION_SYNDROME	WP_10Q11_21Q11_23_COPY_NUMBER_VARIATION_SYNDROME	WP_10Q11_21Q11_23_COPY_NUMBER_VARIATION_SYNDROME	54	0.396554	1.24293	0.14975	0.427428	0.340654	4145	tags=35%, list=26%, signal=26%	RGMB/CDH1/SMAD9/HSF4/NEO1/OGDHL/BCL2/ITCH/DLD/UVSSA/SMARCC2/ERCC5/SIRT6/BMPR1A/JUND/BMP2/BAZ1B/MYO1C/PARG
REACTOME_MASTL_FACILITATES_MITOTIC_PROGRESSION	REACTOME_MASTL_FACILITATES_MITOTIC_PROGRESSION	REACTOME_MASTL_FACILITATES_MITOTIC_PROGRESSION	10	-0.581248	-1.31066	0.150215	0.428342	0.341383	3853	tags=50%, list=24%, signal=38%	PPP2CA/CDK1/ARPP19/MASTL/CCNB1
REACTOME_FORMATION_OF_THE_BETA_CATENIN_TCF_TRANSACTIVATING_COMPLEX	REACTOME_FORMATION_OF_THE_BETA_CATENIN_TCF_TRANSACTIVATING_COMPLEX	REACTOME_FORMATION_OF_THE_BETA_CATENIN_TCF_TRANSACTIVATING_COMPLEX	31	0.459279	1.28431	0.150613	0.428657	0.341634	2412	tags=26%, list=15%, signal=22%	AXIN2/TLE2/TCF7/BCL9/CREBBP/TLE1/TCF7L2/KMT2D
WP_OVARIAN_INFERTILITY	WP_OVARIAN_INFERTILITY	WP_OVARIAN_INFERTILITY	35	0.446239	1.27474	0.150613	0.428657	0.341634	1931	tags=26%, list=12%, signal=23%	PRLR/MLH1/VDR/CCND2/NRIP1/SYNE2/SMAD3/SMPD1/CDKN1B
REACTOME_RETINOID_CYCLE_DISEASE_EVENTS	REACTOME_RETINOID_CYCLE_DISEASE_EVENTS	REACTOME_RETINOID_CYCLE_DISEASE_EVENTS	10	0.62191	1.33237	0.151119	0.429687	0.342455	5813	tags=80%, list=36%, signal=51%	STRA6/NAPEPLD/RBP1/RLBP1/TTR/RDH12/RBP4/RDH5
REACTOME_DISEASES_ASSOCIATED_WITH_GLYCOSAMINOGLYCAN_METABOLISM	REACTOME_DISEASES_ASSOCIATED_WITH_GLYCOSAMINOGLYCAN_METABOLISM	REACTOME_DISEASES_ASSOCIATED_WITH_GLYCOSAMINOGLYCAN_METABOLISM	41	-0.391769	-1.23407	0.152273	0.432553	0.34474	2892	tags=41%, list=18%, signal=34%	CHST14/CSPG5/HSPG2/B3GALT6/PRELP/FMOD/CSPG4/GPC1/CHST6/CHSY1/CHST3/GPC6/SDC2/DCN/VCAN/LUM/BGN
WP_MESODERMAL_COMMITMENT_PATHWAY	WP_MESODERMAL_COMMITMENT_PATHWAY	WP_MESODERMAL_COMMITMENT_PATHWAY	135	0.322981	1.18279	0.152516	0.432831	0.344961	1978	tags=21%, list=12%, signal=19%	VAV3/LEFTY1/AXIN2/SESN1/HNF4A/TOX3/SLC2A12/PBX1/FOXA2/PITX2/MBTD1/AXIN1/EPB41L5/FZD5/ARL4A/CEP250/GRHL2/KLF5/SMAD6/TBX3/JARID2/NODAL/KLF4/ACVR2B/SMAD3/ZNF462/NFE2L2/UBR5/ACVR2A
KEGG_MEDICUS_REFERENCE_CXCR4_GNAQ_PLCB_G_CALCINEURIN_SIGNALING_PATHWAY	KEGG_MEDICUS_REFERENCE_CXCR4_GNAQ_PLCB_G_CALCINEURIN_SIGNALING_PATHWAY	KEGG_MEDICUS_REFERENCE_CXCR4_GNAQ_PLCB_G_CALCINEURIN_SIGNALING_PATHWAY	19	0.507618	1.27465	0.152727	0.433018	0.34511	1006	tags=21%, list=6%, signal=20%	PLCB4/NFATC2/PLCG1/PLCB1
KEGG_ONE_CARBON_POOL_BY_FOLATE	KEGG_ONE_CARBON_POOL_BY_FOLATE	KEGG_ONE_CARBON_POOL_BY_FOLATE	16	-0.509905	-1.29531	0.153675	0.43529	0.346921	1980	tags=31%, list=12%, signal=27%	DHFR/MTHFD1/SHMT2/MTHFD2/TYMS
REACTOME_KERATAN_SULFATE_DEGRADATION	REACTOME_KERATAN_SULFATE_DEGRADATION	REACTOME_KERATAN_SULFATE_DEGRADATION	14	-0.534134	-1.30811	0.153846	0.435361	0.346977	2270	tags=29%, list=14%, signal=25%	PRELP/FMOD/GNS/LUM
BIOCARTA_CSK_PATHWAY	BIOCARTA_CSK_PATHWAY	BIOCARTA_CSK_PATHWAY	18	-0.485003	-1.26086	0.154195	0.43552	0.347104	2105	tags=44%, list=13%, signal=39%	CD3E/CD4/CD3D/CD247/PTPRC/PRKAR2B/LCK/HLA-DRA
BIOCARTA_PROTEASOME_PATHWAY	BIOCARTA_PROTEASOME_PATHWAY	BIOCARTA_PROTEASOME_PATHWAY	18	-0.486601	-1.26502	0.154195	0.43552	0.347104	3568	tags=56%, list=22%, signal=43%	PSMA5/PSMB4/PSMB2/PSMA4/PSMA3/PSMA1/PSMB3/RPN1/PSMB5/PSMB6
WP_TGF_BETA_SIGNALING_IN_THYROID_CELLS_FOR_EPITHELIAL_MESENCHYMAL_TRANSITION	WP_TGF_BETA_SIGNALING_IN_THYROID_CELLS_FOR_EPITHELIAL_MESENCHYMAL_TRANSITION	WP_TGF_BETA_SIGNALING_IN_THYROID_CELLS_FOR_EPITHELIAL_MESENCHYMAL_TRANSITION	17	-0.493311	-1.27319	0.154867	0.436659	0.348011	2331	tags=59%, list=14%, signal=50%	SMAD2/CDH2/AKT1/SNAI1/RUNX2/CDH16/FN1/VIM/SNAI2/TNC
REACTOME_RAC3_GTPASE_CYCLE	REACTOME_RAC3_GTPASE_CYCLE	REACTOME_RAC3_GTPASE_CYCLE	90	-0.316272	-1.15854	0.154891	0.436659	0.348011	2152	tags=23%, list=13%, signal=20%	SWAP70/SRGAP2/DOCK10/VRK2/DEPDC1B/BAIAP2/MCAM/NCKAP1L/ARHGDIB/TIAM1/NCF1/RAC3/LMAN1/EPHA2/CDC42EP1/AMIGO2/FERMT2/CAV1/CYBB/WASF1/NCF2
REACTOME_PI_METABOLISM	REACTOME_PI_METABOLISM	REACTOME_PI_METABOLISM	79	0.360285	1.21091	0.155556	0.43718	0.348427	4507	tags=37%, list=28%, signal=27%	INPP5J/GDPD5/INPP5D/PIP5K1B/PIK3R1/PLEKHA6/OCRL/PIK3C2B/TNFAIP8L3/GDPD3/PLEKHA5/PLEKHA1/SYNJ2/MTM1/PNPLA7/PIK3CB/GDPD1/MTMR3/MTMR14/SBF2/BMX/MTMR10/PNPLA6/PLEKHA8/INPP5E/PIK3C2A/PLEKHA2/RAB5A/RAB14
REACTOME_A_TETRASACCHARIDE_LINKER_SEQUENCE_IS_REQUIRED_FOR_GAG_SYNTHESIS	REACTOME_A_TETRASACCHARIDE_LINKER_SEQUENCE_IS_REQUIRED_FOR_GAG_SYNTHESIS	REACTOME_A_TETRASACCHARIDE_LINKER_SEQUENCE_IS_REQUIRED_FOR_GAG_SYNTHESIS	26	-0.443099	-1.2536	0.155606	0.43718	0.348427	1476	tags=38%, list=9%, signal=35%	CSPG5/HSPG2/B3GALT6/CSPG4/GPC1/GPC6/SDC2/DCN/VCAN/BGN
REACTOME_HEPARAN_SULFATE_HEPARIN_HS_GAG_METABOLISM	REACTOME_HEPARAN_SULFATE_HEPARIN_HS_GAG_METABOLISM	REACTOME_HEPARAN_SULFATE_HEPARIN_HS_GAG_METABOLISM	56	-0.353699	-1.19112	0.155612	0.43718	0.348427	1832	tags=23%, list=11%, signal=21%	HS3ST1/HS3ST2/CSPG4/GPC1/HS3ST3B1/HS6ST2/GPC6/SDC2/HPSE/DCN/HS3ST3A1/VCAN/BGN
REACTOME_COPII_MEDIATED_VESICLE_TRANSPORT	REACTOME_COPII_MEDIATED_VESICLE_TRANSPORT	REACTOME_COPII_MEDIATED_VESICLE_TRANSPORT	67	-0.345983	-1.19811	0.155844	0.43718	0.348427	2481	tags=27%, list=15%, signal=23%	SEC22C/STX5/CNIH3/SEC24A/TMED2/SEC13/TMED10/TRAPPC1/MCFD2/TRAPPC6B/CTSC/NAPG/SERPINA1/LMAN1/CNIH1/SEC24D/COL7A1/F5
WP_SPHINGOLIPID_METABOLISM_OVERVIEW	WP_SPHINGOLIPID_METABOLISM_OVERVIEW	WP_SPHINGOLIPID_METABOLISM_OVERVIEW	22	-0.479515	-1.29119	0.155963	0.43718	0.348427	1227	tags=27%, list=8%, signal=25%	KDSR/SGMS2/SGPP1/DEGS1/SGMS1/SPHK1
PID_ENDOTHELIN_PATHWAY	PID_ENDOTHELIN_PATHWAY	PID_ENDOTHELIN_PATHWAY	63	-0.346392	-1.19208	0.15601	0.43718	0.348427	2359	tags=29%, list=15%, signal=24%	PRKCB/GNAI1/PRKCH/GNAZ/FOS/GNA12/AKT1/GNAI3/HRAS/EDNRA/JAK2/GNAI2/ADCY7/COL3A1/COL1A2/GNA15/PLA2G4A/MMP1
WP_NEOVASCULARISATION_PROCESSES	WP_NEOVASCULARISATION_PROCESSES	WP_NEOVASCULARISATION_PROCESSES	37	-0.403483	-1.2344	0.156177	0.43718	0.348427	2818	tags=43%, list=17%, signal=36%	ANGPT1/KDR/PDGFB/SMAD2/RELB/TGFB2/AKT1/NFKB2/TGFBR1/NOTCH3/KITLG/TGFB3/HIF1A/TGFB1/MMP9/CXCR4
BIOCARTA_PDZS_PATHWAY	BIOCARTA_PDZS_PATHWAY	BIOCARTA_PDZS_PATHWAY	17	0.526382	1.29535	0.156364	0.43718	0.348427	5105	tags=71%, list=32%, signal=48%	PCLO/NFASC/CASK/DLG1/NRXN3/EPB41/SPTAN1/NCAM1/GRIN1/DLG4/ADD1/DLG3
WP_GLYCOLYSIS_AND_GLUCONEOGENESIS	WP_GLYCOLYSIS_AND_GLUCONEOGENESIS	WP_GLYCOLYSIS_AND_GLUCONEOGENESIS	44	-0.382835	-1.22346	0.156398	0.43718	0.348427	2780	tags=41%, list=17%, signal=34%	HK1/TPI1/PGK1/PGAM2/LDHA/GPI/ALDOA/GAPDH/PFKP/SLC2A5/PGAM1/PKM/ENO1/LDHB/SLC2A1/HK3/SLC2A3/ENO2
WP_WNT_SIGNALING_PATHWAY_AND_PLURIPOTENCY	WP_WNT_SIGNALING_PATHWAY_AND_PLURIPOTENCY	WP_WNT_SIGNALING_PATHWAY_AND_PLURIPOTENCY	94	0.349003	1.21085	0.156704	0.437626	0.348782	2661	tags=26%, list=16%, signal=21%	NKD1/AXIN2/JUN/TCF7/AXIN1/CCND2/WNT5B/FZD5/WNT11/NKD2/PPP2R3A/PRKCD/LRP6/PRKCZ/CREBBP/FRAT1/WNT4/FZD9/PRKCA/TCF7L2/FZD10/WNT2B/PRKCQ/PRKCE
WP_CYSTEINE_AND_METHIONINE_CATABOLISM	WP_CYSTEINE_AND_METHIONINE_CATABOLISM	WP_CYSTEINE_AND_METHIONINE_CATABOLISM	14	0.561438	1.31181	0.157221	0.438657	0.349604	4161	tags=57%, list=26%, signal=42%	MPST/GSS/MAT1A/SUOX/CSAD/GCLC/AHCY/BHMT
KEGG_MEDICUS_REFERENCE_TRANSCRIPTIONAL_ACTIVATION_BY_ACETYLATION_OF_H3K27	KEGG_MEDICUS_REFERENCE_TRANSCRIPTIONAL_ACTIVATION_BY_ACETYLATION_OF_H3K27	KEGG_MEDICUS_REFERENCE_TRANSCRIPTIONAL_ACTIVATION_BY_ACETYLATION_OF_H3K27	11	0.598318	1.3244	0.158088	0.440664	0.351203	2571	tags=45%, list=16%, signal=38%	AUTS2/FBRS/DCAF7/PCGF5/RYBP
REACTOME_RIBAVIRIN_ADME	REACTOME_RIBAVIRIN_ADME	REACTOME_RIBAVIRIN_ADME	10	-0.575596	-1.29792	0.158798	0.442229	0.352451	1312	tags=40%, list=8%, signal=37%	NME1/PNP/SLC28A3/ADA
WP_DOPAMINE_METABOLISM	WP_DOPAMINE_METABOLISM	WP_DOPAMINE_METABOLISM	13	0.580689	1.33243	0.159341	0.443324	0.353324	441	tags=23%, list=3%, signal=22%	DDC/PRKACB/MAOA
REACTOME_INTERLEUKIN_RECEPTOR_SHC_SIGNALING	REACTOME_INTERLEUKIN_RECEPTOR_SHC_SIGNALING	REACTOME_INTERLEUKIN_RECEPTOR_SHC_SIGNALING	27	-0.437364	-1.24591	0.159722	0.443744	0.353658	2396	tags=37%, list=15%, signal=32%	PIK3R3/JAK3/IL3RA/PIK3CD/CSF2/CSF2RA/JAK2/IL2RA/IL2RB/CSF2RB
REACTOME_ER_TO_GOLGI_ANTEROGRADE_TRANSPORT	REACTOME_ER_TO_GOLGI_ANTEROGRADE_TRANSPORT	REACTOME_ER_TO_GOLGI_ANTEROGRADE_TRANSPORT	148	-0.293824	-1.15495	0.159892	0.443744	0.353658	2481	tags=23%, list=15%, signal=20%	KDELR1/CAPZB/COPG1/SEC22C/STX5/CNIH3/SEC24A/TMED2/SEC13/TMED10/TRAPPC1/TUBB3/TUBA4A/MCFD2/TUBA1C/TRAPPC6B/ARF4/COPZ2/TUBB2B/TUBA1B/CTSC/NAPG/SERPINA1/LMAN1/ARFGAP3/TUBA1A/CNIH1/SEC24D/TUBB2A/COL7A1/F5/KDELR3/CD55/TUBB6
WP_CELL_DIFFERENTIATION_EXPANDED_INDEX	WP_CELL_DIFFERENTIATION_EXPANDED_INDEX	WP_CELL_DIFFERENTIATION_EXPANDED_INDEX	17	0.52249	1.28577	0.16	0.443744	0.353658	1687	tags=18%, list=10%, signal=16%	LEFTY1/HDAC5/KLF4
BIOCARTA_CCR5_PATHWAY	BIOCARTA_CCR5_PATHWAY	BIOCARTA_CCR5_PATHWAY	15	-0.516169	-1.29022	0.160088	0.443744	0.353658	779	tags=27%, list=5%, signal=25%	CCR5/CCL2/CXCR4/CCL4
REACTOME_TRANSCRIPTIONAL_REGULATION_BY_RUNX1	REACTOME_TRANSCRIPTIONAL_REGULATION_BY_RUNX1	REACTOME_TRANSCRIPTIONAL_REGULATION_BY_RUNX1	171	-0.288845	-1.14753	0.16035	0.444057	0.353908	3056	tags=28%, list=19%, signal=23%	PSMB10/PSMD1/PSMD12/PSMA4/UBA52/YAF2/LMO2/PRKCB/PSMD14/SOCS4/PSMA3/PSMA1/PML/CBFB/CR1/PRMT1/PSMD8/CCND1/MYL9/THBS1/PSMB3/SMARCD3/PSMD9/PSMC4/PSMD2/RUNX2/NR4A3/PSMC1/PSMC3/CBX6/PSMB8/PSMB5/CTLA4/GATA3/CSF2/PSME1/MNAT1/PSMC6/PSMB6/IL2RA/SPI1/IFNG/SOCS3/TNFRSF18/RSPO3/CTSK/PSMB9/CTSL
WP_CHOLESTEROL_SYNTHESIS_DISORDERS	WP_CHOLESTEROL_SYNTHESIS_DISORDERS	WP_CHOLESTEROL_SYNTHESIS_DISORDERS	17	0.519493	1.27839	0.161818	0.447707	0.356817	5306	tags=65%, list=33%, signal=44%	MSMO1/EBP/HMGCR/IDI1/FDFT1/MVD/MVK/LBR/HSD3B2/HMGCS1/SQLE
REACTOME_RHO_GTPASES_ACTIVATE_IQGAPS	REACTOME_RHO_GTPASES_ACTIVATE_IQGAPS	REACTOME_RHO_GTPASES_ACTIVATE_IQGAPS	26	-0.438248	-1.23988	0.162471	0.448428	0.357391	2447	tags=35%, list=15%, signal=29%	ACTB/TUBB3/TUBA4A/TUBA1C/TUBB2B/TUBA1B/TUBA1A/TUBB2A/TUBB6
WP_GPCRS_CLASS_C_METABOTROPIC_GLUTAMATE_PHEROMONE	WP_GPCRS_CLASS_C_METABOTROPIC_GLUTAMATE_PHEROMONE	WP_GPCRS_CLASS_C_METABOTROPIC_GLUTAMATE_PHEROMONE	14	0.559317	1.30685	0.162706	0.448428	0.357391	1259	tags=14%, list=8%, signal=13%	GRM8/GPRC5C
REACTOME_AURKA_ACTIVATION_BY_TPX2	REACTOME_AURKA_ACTIVATION_BY_TPX2	REACTOME_AURKA_ACTIVATION_BY_TPX2	70	-0.336799	-1.1858	0.162791	0.448428	0.357391	3989	tags=41%, list=25%, signal=31%	TUBB4B/CKAP5/HAUS3/PAFAH1B1/DYNLL1/CETN2/ODF2/HAUS6/ACTR1A/SDCCAG8/CDK1/HAUS8/CEP78/CEP192/NEDD1/PLK4/CEP135/TUBA4A/YWHAE/HMMR/TUBB/PLK1/NEK2/TUBG1/HSP90AA1/HAUS1/TUBA1A/CEP76/PRKAR2B
REACTOME_BUDDING_AND_MATURATION_OF_HIV_VIRION	REACTOME_BUDDING_AND_MATURATION_OF_HIV_VIRION	REACTOME_BUDDING_AND_MATURATION_OF_HIV_VIRION	26	0.475635	1.27793	0.162832	0.448428	0.357391	5748	tags=54%, list=36%, signal=35%	CHMP4B/NEDD4L/CHMP4C/PDCD6IP/MVB12B/PPIA/CHMP2A/TSG101/UBAP1/VPS28/CHMP2B/CHMP6/RPS27A/VPS4A
WP_4P16_3_COPY_NUMBER_VARIATION	WP_4P16_3_COPY_NUMBER_VARIATION	WP_4P16_3_COPY_NUMBER_VARIATION	26	0.47591	1.27867	0.162832	0.448428	0.357391	3008	tags=38%, list=19%, signal=31%	FGFR3/NELFCD/PIK3R1/PLCG1/GAB1/TMEM129/MAPK3/SOS1/C4orf48/FAM53A
REACTOME_INTEGRATION_OF_ENERGY_METABOLISM	REACTOME_INTEGRATION_OF_ENERGY_METABOLISM	REACTOME_INTEGRATION_OF_ENERGY_METABOLISM	107	0.338376	1.19923	0.166934	0.4593	0.366057	2964	tags=26%, list=18%, signal=22%	GNG4/PRKACB/CACNA1D/PKLR/MLXIPL/ITPR2/PRKAR2A/ACACB/ADCY6/PLCB1/ADRA2C/CHRM3/CACNA2D2/GNG12/MARCKS/ADRA2A/CACNB2/GNA11/STK11/GCG/PRKCA/ADCY3/GNG13/ADIPOR2/AKAP5/IQGAP1/PRKAR1B/ACSL3
REACTOME_TRANSPORT_OF_VITAMINS_NUCLEOSIDES_AND_RELATED_MOLECULES	REACTOME_TRANSPORT_OF_VITAMINS_NUCLEOSIDES_AND_RELATED_MOLECULES	REACTOME_TRANSPORT_OF_VITAMINS_NUCLEOSIDES_AND_RELATED_MOLECULES	41	0.419995	1.23557	0.16726	0.459771	0.366432	2849	tags=34%, list=18%, signal=28%	LCN15/SLC5A6/SLC35D1/LCN12/SLC35D2/SLC35A3/SLCO2A1/SLC35B3/SLC29A4/SLCO4A1/SLCO3A1/SLC29A3/PDZD11/SLC28A2
KEGG_MEDICUS_REFERENCE_COPII_VESICLE_FORMATION	KEGG_MEDICUS_REFERENCE_COPII_VESICLE_FORMATION	KEGG_MEDICUS_REFERENCE_COPII_VESICLE_FORMATION	12	-0.546209	-1.28286	0.168122	0.460495	0.367008	2288	tags=33%, list=14%, signal=29%	SEC24A/SEC13/SAR1A/SEC24D
REACTOME_SYNTHESIS_SECRETION_AND_INACTIVATION_OF_GLUCOSE_DEPENDENT_INSULINOTROPIC_POLYPEPTIDE_GIP	REACTOME_SYNTHESIS_SECRETION_AND_INACTIVATION_OF_GLUCOSE_DEPENDENT_INSULINOTROPIC_POLYPEPTIDE_GIP	REACTOME_SYNTHESIS_SECRETION_AND_INACTIVATION_OF_GLUCOSE_DEPENDENT_INSULINOTROPIC_POLYPEPTIDE_GIP	12	-0.548514	-1.28828	0.168122	0.460495	0.367008	1970	tags=50%, list=12%, signal=44%	PAX6/SEC11A/SEC11C/SPCS3/ISL1/DPP4
WP_NANOPARTICLE_TRIGGERED_REGULATED_NECROSIS	WP_NANOPARTICLE_TRIGGERED_REGULATED_NECROSIS	WP_NANOPARTICLE_TRIGGERED_REGULATED_NECROSIS	12	-0.548488	-1.28821	0.168122	0.460495	0.367008	1985	tags=33%, list=12%, signal=29%	FADD/TNF/PARP1/PLA2G4A
REACTOME_NUCLEAR_EVENTS_STIMULATED_BY_ALK_SIGNALING_IN_CANCER	REACTOME_NUCLEAR_EVENTS_STIMULATED_BY_ALK_SIGNALING_IN_CANCER	REACTOME_NUCLEAR_EVENTS_STIMULATED_BY_ALK_SIGNALING_IN_CANCER	19	-0.475937	-1.26375	0.168142	0.460495	0.367008	1726	tags=16%, list=11%, signal=14%	NPM1/FN1/BCL2A1
WP_MAMMARY_GLAND_DEVELOPMENT_PATHWAY_PUBERTY_STAGE_2_OF_4	WP_MAMMARY_GLAND_DEVELOPMENT_PATHWAY_PUBERTY_STAGE_2_OF_4	WP_MAMMARY_GLAND_DEVELOPMENT_PATHWAY_PUBERTY_STAGE_2_OF_4	13	-0.537668	-1.28545	0.16886	0.46085	0.367291	644	tags=38%, list=4%, signal=37%	CCND1/FN1/VIM/TIMP1/FOSL1
KEGG_MEDICUS_VARIANT_MUTATION_INACTIVATED_ATP1A1_TO_ANGIOTENSIN_ALDOSTERONE_SIGNALING_PATHWAY	KEGG_MEDICUS_VARIANT_MUTATION_INACTIVATED_ATP1A1_TO_ANGIOTENSIN_ALDOSTERONE_SIGNALING_PATHWAY	KEGG_MEDICUS_VARIANT_MUTATION_INACTIVATED_ATP1A1_TO_ANGIOTENSIN_ALDOSTERONE_SIGNALING_PATHWAY	23	0.477761	1.26051	0.169039	0.46085	0.367291	3789	tags=39%, list=23%, signal=30%	CAMK1D/CACNA1D/ATP1A1/CREB3L3/CYP11B2/ATF6B/CACNA1H/CAMK2D/CAMK2G
REACTOME_SIGNALING_BY_NTRK3_TRKC	REACTOME_SIGNALING_BY_NTRK3_TRKC	REACTOME_SIGNALING_BY_NTRK3_TRKC	17	0.516426	1.27084	0.169091	0.46085	0.367291	1538	tags=24%, list=10%, signal=21%	PTPRO/PIK3R1/PLCG1/SRC
KEGG_MEDICUS_VARIANT_AMPLIFIED_EGFR_TO_PLCG_CAMK_SIGNALING_PATHWAY	KEGG_MEDICUS_VARIANT_AMPLIFIED_EGFR_TO_PLCG_CAMK_SIGNALING_PATHWAY	KEGG_MEDICUS_VARIANT_AMPLIFIED_EGFR_TO_PLCG_CAMK_SIGNALING_PATHWAY	12	0.584728	1.31975	0.169118	0.46085	0.367291	1357	tags=25%, list=8%, signal=23%	CAMK1D/PLCG1/EGFR
PID_PI3KCI_PATHWAY	PID_PI3KCI_PATHWAY	PID_PI3KCI_PATHWAY	48	-0.366802	-1.19309	0.169118	0.46085	0.367291	2396	tags=31%, list=15%, signal=27%	PIK3R3/BTK/PLCG2/ITK/PIK3CG/DAPP1/PIK3CD/PIK3R5/HRAS/HSP90AA1/LYN/FGR/HCK/FYN/LCK
KEGG_MEDICUS_REFERENCE_CXCR4_GNB_G_RAC_SIGNALING_PATHWAY	KEGG_MEDICUS_REFERENCE_CXCR4_GNB_G_RAC_SIGNALING_PATHWAY	KEGG_MEDICUS_REFERENCE_CXCR4_GNB_G_RAC_SIGNALING_PATHWAY	26	-0.435193	-1.23123	0.169336	0.46085	0.367291	1716	tags=38%, list=11%, signal=34%	GNB1/GNG2/GNG10/RAC2/GNB5/GNG11/RAC3/GNB4/CFL2/CXCR4
WP_APOPTOSIS	WP_APOPTOSIS	WP_APOPTOSIS	82	-0.318068	-1.15071	0.169355	0.46085	0.367291	3813	tags=37%, list=24%, signal=28%	TP73/BCL2L11/CASP2/TNFRSF10B/MAP3K1/NFKBIA/CHUK/FADD/DFFB/HELLS/MDM2/TRAF3/NFKBIE/FASLG/MAP2K4/TNFRSF1B/TNF/AKT1/GZMB/BIRC5/CDKN2A/CASP4/IRF7/IRF1/FAS/BOK/BNIP3L/BIRC3/PRF1/PMAIP1
WP_FEMALE_STEROID_HORMONES_IN_CARDIOMYOCYTE_ENERGY_METABOLISM	WP_FEMALE_STEROID_HORMONES_IN_CARDIOMYOCYTE_ENERGY_METABOLISM	WP_FEMALE_STEROID_HORMONES_IN_CARDIOMYOCYTE_ENERGY_METABOLISM	13	0.574713	1.31872	0.17033	0.463079	0.369068	4107	tags=54%, list=25%, signal=40%	PPARA/ESRRA/PPARGC1B/STK11/ACADM/SLC2A4/HADHB
WP_DEVELOPMENT_OF_URETERIC_COLLECTION_SYSTEM	WP_DEVELOPMENT_OF_URETERIC_COLLECTION_SYSTEM	WP_DEVELOPMENT_OF_URETERIC_COLLECTION_SYSTEM	59	0.375168	1.20559	0.171799	0.466547	0.371832	3972	tags=46%, list=25%, signal=35%	FREM2/HNF1B/VANGL2/SHH/PBX1/HOXD11/BMP5/FREM1/CRIM1/WNT11/ITGA8/GRIP1/ETV4/SMO/RARG/BMPR1A/EYA1/RARA/SIX2/BMP2/GLI1/WT1/GFRA1/BMPR2/SALL1/MYCN/FGFR2
WP_MONOAMINE_GPCRS	WP_MONOAMINE_GPCRS	WP_MONOAMINE_GPCRS	33	0.446906	1.25473	0.171986	0.466547	0.371832	1492	tags=15%, list=9%, signal=14%	DRD2/ADRA2C/CHRM3/HTR4/ADRA2A
REACTOME_SHC1_EVENTS_IN_EGFR_SIGNALING	REACTOME_SHC1_EVENTS_IN_EGFR_SIGNALING	REACTOME_SHC1_EVENTS_IN_EGFR_SIGNALING	13	0.572837	1.31441	0.172161	0.466547	0.371832	2556	tags=38%, list=16%, signal=32%	EREG/AREG/EGFR/HBEGF/SOS1
PID_RAC1_REG_PATHWAY	PID_RAC1_REG_PATHWAY	PID_RAC1_REG_PATHWAY	38	0.423296	1.23534	0.172232	0.466547	0.371832	2560	tags=32%, list=16%, signal=27%	VAV3/CHN2/NGEF/SPATA13/KALRN/ABR/VAV2/TRIO/EPS8/DOCK6/SOS1/ARHGAP17
REACTOME_TRANSLATION_OF_REPLICASE_AND_ASSEMBLY_OF_THE_REPLICATION_TRANSCRIPTION_COMPLEX	REACTOME_TRANSLATION_OF_REPLICASE_AND_ASSEMBLY_OF_THE_REPLICATION_TRANSCRIPTION_COMPLEX	REACTOME_TRANSLATION_OF_REPLICASE_AND_ASSEMBLY_OF_THE_REPLICATION_TRANSCRIPTION_COMPLEX	12	0.583163	1.31622	0.172794	0.46743	0.372536	1738	tags=25%, list=11%, signal=22%	CHMP4B/CHMP4C/BECN1
REACTOME_KEAP1_NFE2L2_PATHWAY	REACTOME_KEAP1_NFE2L2_PATHWAY	REACTOME_KEAP1_NFE2L2_PATHWAY	120	-0.296842	-1.13939	0.172872	0.46743	0.372536	3442	tags=33%, list=21%, signal=26%	PSMC5/PSMD13/UBB/EGF/RBX1/PSMB4/SRXN1/PSMB2/PSMB10/PSMD1/PSMD12/PSMA4/UBA52/PGD/PSMD14/PSMA3/PSMA1/SKP2/PSMD8/PSMB3/PSMD9/G6PD/PSMC4/AKT1/PRDX1/PSMD2/PSMC1/PSMC3/PSMB8/HMOX1/AKT3/PSMB5/PSME1/PSMC6/CDKN2A/PSMB6/PSMB9/SLC7A11/ME1/CCL2
BIOCARTA_GPCR_PATHWAY	BIOCARTA_GPCR_PATHWAY	BIOCARTA_GPCR_PATHWAY	28	0.459813	1.25761	0.173145	0.467743	0.372785	719	tags=21%, list=4%, signal=21%	PRKACB/JUN/NFATC2/RPS6KA3/PLCG1/PRKAR2A
BIOCARTA_NTHI_PATHWAY	BIOCARTA_NTHI_PATHWAY	BIOCARTA_NTHI_PATHWAY	22	-0.474417	-1.27746	0.174312	0.470468	0.374957	2050	tags=27%, list=13%, signal=24%	MAPK11/TNF/TGFBR1/NR3C1/IL1B/CXCL8
KEGG_MEDICUS_REFERENCE_GLOBAL_GENOME_NER	KEGG_MEDICUS_REFERENCE_GLOBAL_GENOME_NER	KEGG_MEDICUS_REFERENCE_GLOBAL_GENOME_NER	17	-0.485473	-1.25296	0.174779	0.471301	0.375621	5405	tags=76%, list=33%, signal=51%	RAD23B/GTF2H3/ERCC3/CDK7/DDB1/GTF2H1/ERCC2/GTF2H5/GTF2H4/CETN2/RBX1/DDB2/MNAT1
REACTOME_FORMATION_OF_THE_CORNIFIED_ENVELOPE	REACTOME_FORMATION_OF_THE_CORNIFIED_ENVELOPE	REACTOME_FORMATION_OF_THE_CORNIFIED_ENVELOPE	98	-0.307157	-1.14429	0.175066	0.471649	0.375899	442	tags=13%, list=3%, signal=13%	KRT19/KRT13/KRT14/KRT5/KLK8/KRT6B/KRT7/SPRR3/SPRR1A/KRT16/DSG3/SPRR1B/KRT6A
REACTOME_RAC1_GTPASE_CYCLE	REACTOME_RAC1_GTPASE_CYCLE	REACTOME_RAC1_GTPASE_CYCLE	177	0.299005	1.13524	0.175573	0.472585	0.376645	2830	tags=27%, list=18%, signal=22%	VAV3/NOX1/PLEKHG6/CHN2/FARP1/ARHGAP44/FAM13A/CYFIP2/NOXA1/NGEF/PIK3R1/SPATA13/MPP7/ARHGEF5/MCF2L/OPHN1/BAIAP2L1/SH3BP1/KALRN/ARHGAP33/ARAP1/ARHGEF19/ABR/SOS2/FARP2/SRGAP3/LEMD3/ARHGEF18/ARHGAP27/VAV2/KTN1/NOXO1/WASL/ARHGEF11/TRIO/ARHGAP26/PAK1/ARAP3/DOCK6/PLD1/SOS1/ARHGAP17/WIPF2/IQGAP1/TFRC/SYDE2/PLEKHG4
REACTOME_MAPK3_ERK1_ACTIVATION	REACTOME_MAPK3_ERK1_ACTIVATION	REACTOME_MAPK3_ERK1_ACTIVATION	10	-0.566938	-1.27839	0.175966	0.473216	0.377147	883	tags=60%, list=5%, signal=57%	PTPN11/IL6ST/MAP2K1/CDK1/JAK2/IL6
REACTOME_DETOXIFICATION_OF_REACTIVE_OXYGEN_SPECIES	REACTOME_DETOXIFICATION_OF_REACTIVE_OXYGEN_SPECIES	REACTOME_DETOXIFICATION_OF_REACTIVE_OXYGEN_SPECIES	34	-0.405269	-1.21963	0.176201	0.473422	0.377311	1122	tags=32%, list=7%, signal=30%	SOD1/PRDX1/NCF1/GSTP1/GPX7/SOD2/NOX4/CYBB/GPX3/GPX8/NCF2
BIOCARTA_41BB_PATHWAY	BIOCARTA_41BB_PATHWAY	BIOCARTA_41BB_PATHWAY	18	-0.47743	-1.24117	0.176871	0.474673	0.378309	3489	tags=44%, list=22%, signal=35%	MAP3K1/NFKBIA/CHUK/MAP4K5/MAP3K5/TNFRSF9/IFNG/TNFSF9
KEGG_MEDICUS_REFERENCE_MISMATCH_REPAIR	KEGG_MEDICUS_REFERENCE_MISMATCH_REPAIR	KEGG_MEDICUS_REFERENCE_MISMATCH_REPAIR	25	-0.448558	-1.24131	0.177305	0.474673	0.378309	4730	tags=72%, list=29%, signal=51%	RPA3/POLE4/LIG1/PCNA/MSH2/MLH3/POLE3/POLD2/RFC1/POLD1/MSH6/RFC5/RFC4/RFC2/RPA1/RPA2/EXO1/POLE2
PID_WNT_SIGNALING_PATHWAY	PID_WNT_SIGNALING_PATHWAY	PID_WNT_SIGNALING_PATHWAY	25	-0.448316	-1.24064	0.177305	0.474673	0.378309	1621	tags=32%, list=10%, signal=29%	FZD1/IGFBP4/WNT5A/WNT2/ROR2/FZD2/DKK1/CTHRC1
WP_S1P_RECEPTOR_SIGNAL_TRANSDUCTION	WP_S1P_RECEPTOR_SIGNAL_TRANSDUCTION	WP_S1P_RECEPTOR_SIGNAL_TRANSDUCTION	25	-0.448526	-1.24123	0.177305	0.474673	0.378309	2949	tags=40%, list=18%, signal=33%	RACGAP1/MAPK12/GNAI1/S1PR3/AKT1/S1PR1/GNAI3/AKT3/GNAI2/SPHK1
REACTOME_RHOB_GTPASE_CYCLE	REACTOME_RHOB_GTPASE_CYCLE	REACTOME_RHOB_GTPASE_CYCLE	67	0.366588	1.20069	0.178282	0.47686	0.380052	2085	tags=27%, list=13%, signal=23%	ROCK2/PIK3R1/RHPN2/ARHGEF10L/SOWAHC/ARHGEF5/MCF2L/OPHN1/ABR/JUP/ARHGEF1/STARD13/VAV2/TJP2/ARHGEF11/MYO9A/ARHGAP26/AKAP13
BIOCARTA_RAC1_PATHWAY	BIOCARTA_RAC1_PATHWAY	BIOCARTA_RAC1_PATHWAY	21	-0.475038	-1.26598	0.17849	0.476987	0.380153	472	tags=43%, list=3%, signal=42%	LIMK1/MAP3K1/VAV1/RPS6KB1/RALBP1/PIK3CG/CHN1/WASF1/NCF2
REACTOME_HSF1_DEPENDENT_TRANSACTIVATION	REACTOME_HSF1_DEPENDENT_TRANSACTIVATION	REACTOME_HSF1_DEPENDENT_TRANSACTIVATION	35	-0.4067	-1.22216	0.178654	0.476999	0.380162	3566	tags=43%, list=22%, signal=33%	PTGES3/DNAJB6/UBB/HSP90AB1/MRPL18/AKT1S1/HSPB2/FKBP4/HSPB8/HSPB1/HSPA2/CRYAB/HSP90AA1/SERPINH1/HSPA6
WP_BRAIN_DERIVED_NEUROTROPHIC_FACTOR_BDNF_SIGNALING_PATHWAY	WP_BRAIN_DERIVED_NEUROTROPHIC_FACTOR_BDNF_SIGNALING_PATHWAY	WP_BRAIN_DERIVED_NEUROTROPHIC_FACTOR_BDNF_SIGNALING_PATHWAY	136	0.313046	1.14918	0.179128	0.477834	0.380828	3404	tags=30%, list=21%, signal=24%	VAV3/JUN/FOXO3/RPS6KA3/NTRK2/PIK3R1/NCK2/PLCG1/ACACB/PTPRF/SORT1/MARCKS/GRIP1/SHC3/KSR1/PDPK1/SRC/PTK2B/PRKCD/MAP2K5/SH2B1/VAV2/DLG1/TSC2/MAP3K2/SHC2/EIF2S2/MAPK3/NSF/TRAF6/IKBKG/CRTC1/CDKL5/CSNK2A1/SYN1/PRKAA1/IGF2BP1/KIDINS220/RASGRF1/GSK3B/SQSTM1
REACTOME_CA2_PATHWAY	REACTOME_CA2_PATHWAY	REACTOME_CA2_PATHWAY	62	0.367741	1.19173	0.179321	0.477923	0.380899	2242	tags=23%, list=14%, signal=20%	AXIN2/GNG4/TCF7/PDE6A/ITPR2/PLCB1/FZD5/WNT11/GNG12/TNRC6A/TNRC6B/PRKCA/TCF7L2/GNG13
REACTOME_GROWTH_HORMONE_RECEPTOR_SIGNALING	REACTOME_GROWTH_HORMONE_RECEPTOR_SIGNALING	REACTOME_GROWTH_HORMONE_RECEPTOR_SIGNALING	24	-0.448991	-1.24556	0.179724	0.478566	0.381411	944	tags=25%, list=6%, signal=24%	SOCS1/JAK2/LYN/IRS1/SOCS3/STAT1
KEGG_MEDICUS_REFERENCE_AGE_RAGE_SIGNALING_PATHWAY	KEGG_MEDICUS_REFERENCE_AGE_RAGE_SIGNALING_PATHWAY	KEGG_MEDICUS_REFERENCE_AGE_RAGE_SIGNALING_PATHWAY	16	-0.489733	-1.24407	0.180401	0.479941	0.382507	2369	tags=31%, list=15%, signal=27%	MAP2K1/NOS2/TNF/HRAS/IL6
WP_RENIN_ANGIOTENSIN_ALDOSTERONE_SYSTEM_RAAS	WP_RENIN_ANGIOTENSIN_ALDOSTERONE_SYSTEM_RAAS	WP_RENIN_ANGIOTENSIN_ALDOSTERONE_SYSTEM_RAAS	41	0.411141	1.20952	0.181495	0.482419	0.384482	4216	tags=34%, list=26%, signal=25%	CAMK1D/AGT/ITPR2/REN/CALML4/CREB3L3/CYP11B2/ATF6B/CAMK2D/HSD3B1/CAMK2G/GNAQ/HSD3B2/ITPR3
WP_FARNESOID_X_RECEPTOR_PATHWAY	WP_FARNESOID_X_RECEPTOR_PATHWAY	WP_FARNESOID_X_RECEPTOR_PATHWAY	19	0.496422	1.24654	0.181818	0.482848	0.384824	2805	tags=32%, list=17%, signal=26%	PPARGC1A/NR0B2/NR1H4/CYP3A4/RXRA/SLC10A1
KEGG_MEDICUS_PATHOGEN_EBV_EBNA3C_TO_P53_MEDIATED_TRANSCRIPTION	KEGG_MEDICUS_PATHOGEN_EBV_EBNA3C_TO_P53_MEDIATED_TRANSCRIPTION	KEGG_MEDICUS_PATHOGEN_EBV_EBNA3C_TO_P53_MEDIATED_TRANSCRIPTION	10	-0.564073	-1.27193	0.182403	0.483395	0.385259	5448	tags=80%, list=34%, signal=53%	POLK/BAX/TP53/BAK1/GADD45A/MDM2/GADD45B/DDB2
REACTOME_POLO_LIKE_KINASE_MEDIATED_EVENTS	REACTOME_POLO_LIKE_KINASE_MEDIATED_EVENTS	REACTOME_POLO_LIKE_KINASE_MEDIATED_EVENTS	16	-0.489265	-1.24288	0.182628	0.483395	0.385259	4329	tags=50%, list=27%, signal=37%	CENPF/LIN54/LIN9/RBBP4/LIN52/FOXM1/PLK1/CCNB1
REACTOME_CASPASE_ACTIVATION_VIA_DEPENDENCE_RECEPTORS_IN_THE_ABSENCE_OF_LIGAND	REACTOME_CASPASE_ACTIVATION_VIA_DEPENDENCE_RECEPTORS_IN_THE_ABSENCE_OF_LIGAND	REACTOME_CASPASE_ACTIVATION_VIA_DEPENDENCE_RECEPTORS_IN_THE_ABSENCE_OF_LIGAND	10	0.606016	1.29832	0.182836	0.483395	0.385259	13	tags=10%, list=0%, signal=10%	DAPK2
REACTOME_MITOCHONDRIAL_FATTY_ACID_BETA_OXIDATION_OF_SATURATED_FATTY_ACIDS	REACTOME_MITOCHONDRIAL_FATTY_ACID_BETA_OXIDATION_OF_SATURATED_FATTY_ACIDS	REACTOME_MITOCHONDRIAL_FATTY_ACID_BETA_OXIDATION_OF_SATURATED_FATTY_ACIDS	10	0.608384	1.30339	0.182836	0.483395	0.385259	3049	tags=50%, list=19%, signal=41%	ACSM3/ACADS/HADH/HADHA/ACADM
WP_VITAMIN_D_METABOLISM	WP_VITAMIN_D_METABOLISM	WP_VITAMIN_D_METABOLISM	10	0.608465	1.30357	0.182836	0.483395	0.385259	2588	tags=40%, list=16%, signal=34%	CYP27A1/VDR/RXRA/CYP2R1
WP_DNA_IR_DAMAGE_AND_CELLULAR_RESPONSE_VIA_ATR	WP_DNA_IR_DAMAGE_AND_CELLULAR_RESPONSE_VIA_ATR	WP_DNA_IR_DAMAGE_AND_CELLULAR_RESPONSE_VIA_ATR	76	-0.320479	-1.15225	0.183463	0.484621	0.386237	4124	tags=41%, list=26%, signal=31%	PCNA/POLB/MCPH1/RAD1/MSH2/CDK2/TDP1/FANCI/TRIM28/FANCD2/CDK1/MDM2/USP1/NBN/CHEK1/PML/EEF1E1/RAD51/RPA1/RPA2/PARP1/CLSPN/MCM2/FOXM1/RECQL/FEN1/PLK1/CDC45/EXO1/RBBP8/BCL6
KEGG_MEDICUS_VARIANT_AMPLIFIED_PDGFR_TO_PLCG_CAMK_SIGNALING_PATHWAY	KEGG_MEDICUS_VARIANT_AMPLIFIED_PDGFR_TO_PLCG_CAMK_SIGNALING_PATHWAY	KEGG_MEDICUS_VARIANT_AMPLIFIED_PDGFR_TO_PLCG_CAMK_SIGNALING_PATHWAY	12	0.576309	1.30075	0.183824	0.485144	0.386654	695	tags=17%, list=4%, signal=16%	CAMK1D/PLCG1
REACTOME_AZATHIOPRINE_ADME	REACTOME_AZATHIOPRINE_ADME	REACTOME_AZATHIOPRINE_ADME	21	0.476603	1.24087	0.184071	0.485366	0.386831	2849	tags=33%, list=18%, signal=27%	VAV3/XDH/ABCC5/VAV2/GSTA1/GSTM1/SLC28A2
KEGG_GLYCOLYSIS_GLUCONEOGENESIS	KEGG_GLYCOLYSIS_GLUCONEOGENESIS	KEGG_GLYCOLYSIS_GLUCONEOGENESIS	60	0.369701	1.18842	0.184339	0.485457	0.386903	2603	tags=28%, list=16%, signal=24%	PCK1/ADH1C/ADH6/ACSS2/PKLR/ACSS1/ALDH1B1/PDHA1/ALDH2/GALM/PCK2/DLD/HK2/ADH4/ALDOB/FBP2/FBP1
REACTOME_REGULATION_OF_FOXO_TRANSCRIPTIONAL_ACTIVITY_BY_ACETYLATION	REACTOME_REGULATION_OF_FOXO_TRANSCRIPTIONAL_ACTIVITY_BY_ACETYLATION	REACTOME_REGULATION_OF_FOXO_TRANSCRIPTIONAL_ACTIVITY_BY_ACETYLATION	10	0.602686	1.29119	0.184701	0.485457	0.386903	1973	tags=30%, list=12%, signal=26%	FOXO3/FOXO4/CREBBP
WP_LIVER_X_RECEPTOR_PATHWAY	WP_LIVER_X_RECEPTOR_PATHWAY	WP_LIVER_X_RECEPTOR_PATHWAY	10	0.60337	1.29265	0.184701	0.485457	0.386903	3286	tags=40%, list=20%, signal=32%	CYP2B6/CYP3A4/RXRA/SCD
REACTOME_DNA_DAMAGE_RECOGNITION_IN_GG_NER	REACTOME_DNA_DAMAGE_RECOGNITION_IN_GG_NER	REACTOME_DNA_DAMAGE_RECOGNITION_IN_GG_NER	38	-0.389257	-1.20012	0.184758	0.485457	0.386903	3899	tags=55%, list=24%, signal=42%	DDB1/ACTL6A/COPS6/TFPT/GPS1/YY1/COPS2/CETN2/UBB/COPS4/RBX1/UBA52/COPS7A/ACTB/RUVBL1/COPS8/INO80C/DDB2/PARP1/PARP2/COPS3
REACTOME_CONDENSATION_OF_PROPHASE_CHROMOSOMES	REACTOME_CONDENSATION_OF_PROPHASE_CHROMOSOMES	REACTOME_CONDENSATION_OF_PROPHASE_CHROMOSOMES	12	-0.531692	-1.24877	0.18559	0.486422	0.387672	3977	tags=67%, list=25%, signal=50%	SMC4/SMC2/MCPH1/NCAPG2/NCAPD3/CDK1/PLK1/CCNB1
REACTOME_PECAM1_INTERACTIONS	REACTOME_PECAM1_INTERACTIONS	REACTOME_PECAM1_INTERACTIONS	12	-0.532644	-1.251	0.18559	0.486422	0.387672	1521	tags=42%, list=9%, signal=38%	ITGAV/PECAM1/LYN/FYN/LCK
REACTOME_STRIATED_MUSCLE_CONTRACTION	REACTOME_STRIATED_MUSCLE_CONTRACTION	REACTOME_STRIATED_MUSCLE_CONTRACTION	35	-0.402573	-1.20976	0.185615	0.486422	0.387672	2417	tags=31%, list=15%, signal=27%	TMOD2/TPM4/TPM2/TNNI2/TMOD1/TNNI3/ACTC1/DES/VIM/TNNC1/TNNT1
REACTOME_FORMATION_OF_WDR5_CONTAINING_HISTONE_MODIFYING_COMPLEXES	REACTOME_FORMATION_OF_WDR5_CONTAINING_HISTONE_MODIFYING_COMPLEXES	REACTOME_FORMATION_OF_WDR5_CONTAINING_HISTONE_MODIFYING_COMPLEXES	39	0.418178	1.2261	0.186292	0.487766	0.388744	4466	tags=41%, list=28%, signal=30%	NCOA6/PHF20/KANSL1/KMT2C/OGT/KMT2B/KMT2D/KDM6A/AKAP8L/SETD1A/PAGR1/KAT8/SETD1B/KANSL3/KAT2A/HCFC1
REACTOME_MAPK_FAMILY_SIGNALING_CASCADES	REACTOME_MAPK_FAMILY_SIGNALING_CASCADES	REACTOME_MAPK_FAMILY_SIGNALING_CASCADES	313	-0.254146	-1.08393	0.187135	0.489543	0.390159	3444	tags=28%, list=21%, signal=23%	ITGB3/PSMC5/PSMD13/UBB/GOLGA7/PPP2R5E/RGL1/FGF1/EGF/RBX1/RANBP9/PSMB4/PSMB2/MAP2K1/PAQR3/IL17RD/PEA15/PSMB10/PSMD1/PSMD12/TEK/CDK1/PSMA4/UBA52/MARK3/MAPK12/PDE6D/ANGPT1/PPP2R5C/PSMD14/PSMA3/PSMA1/ACTB/PDGFB/JAK3/VCL/IL3RA/PSMD8/PSMB3/SPRED1/ICMT/PSMD9/PSMC4/FGFR1/PSMD2/GRIN2D/PSMC1/PSMC3/VWF/PSMB8/PTPN7/HSPB1/RASGRP3/DUSP2/PSMB5/FGF2/FGF7/RASGEF1A/HRAS/KITLG/CSF2/PSME1/CSF2RA/APBB1IP/RASA3/PSMC6/…
KEGG_MEDICUS_REFERENCE_CHOLESTEROL_BIOSYNTHESIS	KEGG_MEDICUS_REFERENCE_CHOLESTEROL_BIOSYNTHESIS	KEGG_MEDICUS_REFERENCE_CHOLESTEROL_BIOSYNTHESIS	12	0.573179	1.29368	0.1875	0.489638	0.390235	3873	tags=50%, list=24%, signal=38%	MSMO1/EBP/HSD17B7/FDFT1/TM7SF2/LBR
REACTOME_ACTIVATION_OF_THE_PHOTOTRANSDUCTION_CASCADE	REACTOME_ACTIVATION_OF_THE_PHOTOTRANSDUCTION_CASCADE	REACTOME_ACTIVATION_OF_THE_PHOTOTRANSDUCTION_CASCADE	11	0.587759	1.30103	0.1875	0.489638	0.390235	637	tags=18%, list=4%, signal=17%	CNGA1/PDE6A
BIOCARTA_LONGEVITY_PATHWAY	BIOCARTA_LONGEVITY_PATHWAY	BIOCARTA_LONGEVITY_PATHWAY	15	0.534121	1.26578	0.188645	0.491779	0.391942	1769	tags=40%, list=11%, signal=36%	FOXO3/GHR/SOD3/PIK3R1/CAT/IGF1R
REACTOME_TRANSMISSION_ACROSS_CHEMICAL_SYNAPSES	REACTOME_TRANSMISSION_ACROSS_CHEMICAL_SYNAPSES	REACTOME_TRANSMISSION_ACROSS_CHEMICAL_SYNAPSES	257	0.283709	1.11857	0.18865	0.491779	0.391942	2242	tags=16%, list=14%, signal=14%	ABAT/TSPAN7/GNG4/PRKACB/RPS6KA6/SLC1A7/MAOA/RPS6KA3/PRKAB1/NAAA/DNAJC5/PRKAR2A/GABRA2/EPB41L1/ALDH2/ADCY6/SLC38A1/TUBAL3/ARHGEF9/PLCB1/CACNA2D2/CASK/KCNJ2/PPFIA3/GNG12/LIN7B/GRIP1/PDPK1/CACNB2/SRC/SLC6A4/LIN7A/SYN3/SYT1/GLS/DLG1/PICK1/UNC13B/PRKCA/GABRA4/ADCY3/GNG13
KEGG_ABC_TRANSPORTERS	KEGG_ABC_TRANSPORTERS	KEGG_ABC_TRANSPORTERS	42	0.405962	1.2015	0.189474	0.492778	0.392738	1056	tags=14%, list=7%, signal=13%	CFTR/ABCB1/ABCG1/ABCA5/ABCC5/ABCC3
WP_SPLICING_FACTOR_NOVA_REGULATED_SYNAPTIC_PROTEINS	WP_SPLICING_FACTOR_NOVA_REGULATED_SYNAPTIC_PROTEINS	WP_SPLICING_FACTOR_NOVA_REGULATED_SYNAPTIC_PROTEINS	42	0.406182	1.20215	0.189474	0.492778	0.392738	1218	tags=14%, list=8%, signal=13%	PLCB4/EPB41L1/ANK3/NEO1/CASK/EPB41L2
REACTOME_HEME_SIGNALING	REACTOME_HEME_SIGNALING	REACTOME_HEME_SIGNALING	44	0.398467	1.2029	0.189655	0.492778	0.392738	3622	tags=39%, list=22%, signal=30%	PPARGC1A/PPARA/NCOA6/CHD9/NRIP1/TLR4/NFE2L2/CREBBP/NPAS2/RXRA/NCOA2/CRTC1/APOA1/MEF2D/HELZ2/MAFK/CRTC3
PID_DELTA_NP63_PATHWAY	PID_DELTA_NP63_PATHWAY	PID_DELTA_NP63_PATHWAY	43	-0.377952	-1.20495	0.189696	0.492778	0.392738	1454	tags=37%, list=9%, signal=34%	IL1A/HELLS/MDM2/SEC14L2/CEBPD/SFN/KRT14/KRT5/ITGA3/IGFBP3/CDKN2A/AXL/ADA/RAB38/COL5A1/RRAD
REACTOME_HYALURONAN_UPTAKE_AND_DEGRADATION	REACTOME_HYALURONAN_UPTAKE_AND_DEGRADATION	REACTOME_HYALURONAN_UPTAKE_AND_DEGRADATION	12	-0.529352	-1.24327	0.189956	0.493025	0.392935	2886	tags=58%, list=18%, signal=48%	HYAL2/HYAL3/SLC9A1/CD44/LYVE1/HMMR/HYAL1
WP_BLADDER_CANCER	WP_BLADDER_CANCER	WP_BLADDER_CANCER	40	-0.387711	-1.20899	0.190255	0.493201	0.393075	1213	tags=20%, list=8%, signal=19%	HRAS/CDKN2A/MMP2/DAPK1/TYMP/MMP9/CXCL8/MMP1
REACTOME_TRANSPORT_OF_MATURE_TRANSCRIPT_TO_CYTOPLASM	REACTOME_TRANSPORT_OF_MATURE_TRANSCRIPT_TO_CYTOPLASM	REACTOME_TRANSPORT_OF_MATURE_TRANSCRIPT_TO_CYTOPLASM	72	-0.323949	-1.15223	0.190355	0.493201	0.393075	4626	tags=44%, list=29%, signal=32%	NUP98/NUP54/SARNP/THOC6/CHTOP/CPSF3/THOC5/FIP1L1/NUP93/NUP37/NUP43/DDX39A/NUP133/NUP205/RBM8A/CDC40/NUP62/NUP160/NUP50/NUP35/NUP155/THOC1/SEC13/NUP210/EIF4A3/SLBP/MAGOHB/CPSF2/FYTTD1/NDC1/ALYREF/SEH1L
KEGG_MEDICUS_REFERENCE_CA2_CAM_CAMK_SIGNALING_PATHWAY	KEGG_MEDICUS_REFERENCE_CA2_CAM_CAMK_SIGNALING_PATHWAY	KEGG_MEDICUS_REFERENCE_CA2_CAM_CAMK_SIGNALING_PATHWAY	17	0.508751	1.25196	0.190909	0.49395	0.393672	5476	tags=59%, list=34%, signal=39%	CAMK1D/CAMKK1/PHKG2/PHKG1/CAMK2D/CAMK2G/CAMKK2/CALM1/MYLK4/MYLK2
REACTOME_SLC_TRANSPORTER_DISORDERS	REACTOME_SLC_TRANSPORTER_DISORDERS	REACTOME_SLC_TRANSPORTER_DISORDERS	95	0.340987	1.18719	0.191011	0.49395	0.393672	2042	tags=16%, list=13%, signal=14%	SLC26A3/SLC26A2/SLC5A1/SLC40A1/SLC3A1/HEPH/SLC22A5/SLC11A2/SLC35A3/SLC2A9/SLCO2A1/SLC6A19/RAE1/SLC39A4/SLC22A18
REACTOME_FCGR3A_MEDIATED_IL10_SYNTHESIS	REACTOME_FCGR3A_MEDIATED_IL10_SYNTHESIS	REACTOME_FCGR3A_MEDIATED_IL10_SYNTHESIS	37	-0.393793	-1.20476	0.191142	0.49395	0.393672	622	tags=19%, list=4%, signal=18%	LYN/ADCY7/PRKAR2B/FGR/HCK/FYN/FCGR2A
WP_NEURAL_CREST_CELL_MIGRATION_DURING_DEVELOPMENT	WP_NEURAL_CREST_CELL_MIGRATION_DURING_DEVELOPMENT	WP_NEURAL_CREST_CELL_MIGRATION_DURING_DEVELOPMENT	38	-0.38629	-1.19097	0.191686	0.494925	0.394449	2396	tags=39%, list=15%, signal=34%	PIK3R3/PIK3CG/FOS/MMP8/AKT1/PIK3CD/PAK6/AKT3/PIK3R5/TIAM1/EPHB6/MMP2/CDH11/MMP9/TWIST1
REACTOME_BETA_CATENIN_INDEPENDENT_WNT_SIGNALING	REACTOME_BETA_CATENIN_INDEPENDENT_WNT_SIGNALING	REACTOME_BETA_CATENIN_INDEPENDENT_WNT_SIGNALING	141	-0.288895	-1.12111	0.192635	0.496944	0.396058	3442	tags=38%, list=21%, signal=30%	PSMC5/PSMD13/UBB/LEF1/DVL1/PSMB4/PSMB2/PPP3CB/PSMB10/ITPR1/PSMD1/PSMD12/PSMA4/UBA52/PPP3CA/GNB1/PRKCB/PSMD14/SMURF2/PSMA3/PSMA1/AP2B1/GNG2/PPP3R1/PSMD8/FZD1/PRICKLE1/PSMB3/PSMD9/PSMC4/AP2S1/PSMD2/GNG10/PSMC1/PSMC3/PSMB8/AP2M1/PSMB5/WNT5A/RAC2/ROR1/GNB5/PSME1/GNG11/RAC3/PSMC6/NFATC1/PSMB6/PFN1/ROR2/FZD2/GNB4/PSMB9
REACTOME_AGGREPHAGY	REACTOME_AGGREPHAGY	REACTOME_AGGREPHAGY	37	-0.391763	-1.19855	0.193473	0.498675	0.397438	2082	tags=30%, list=13%, signal=26%	TUBB3/TUBA4A/TUBA1C/TUBB2B/TUBA1B/HSP90AA1/TUBA1A/ARL13B/TUBB2A/VIM/TUBB6
WP_ONCOSTATIN_M_SIGNALING_PATHWAY	WP_ONCOSTATIN_M_SIGNALING_PATHWAY	WP_ONCOSTATIN_M_SIGNALING_PATHWAY	56	-0.345558	-1.1637	0.193878	0.499285	0.397924	2359	tags=23%, list=15%, signal=20%	PRKCH/JAK3/FOS/AKT1/HRAS/JAK2/HIF1A/IRS1/SOCS3/PIAS3/OSMR/STAT1/OSM
REACTOME_SARS_COV_2_MODULATES_HOST_TRANSLATION_MACHINERY	REACTOME_SARS_COV_2_MODULATES_HOST_TRANSLATION_MACHINERY	REACTOME_SARS_COV_2_MODULATES_HOST_TRANSLATION_MACHINERY	42	-0.379283	-1.2041	0.194444	0.500312	0.398742	4229	tags=40%, list=26%, signal=30%	SNRPE/RPS29/GEMIN5/RPS16/SNRPG/RPS8/DDX20/RPS18/RPS12/FAU/SNRPD2/RPS5/SNRPF/GEMIN4/RPS4Y1/GEMIN2/SNRPD1
REACTOME_PYRUVATE_METABOLISM_AND_CITRIC_ACID_TCA_CYCLE	REACTOME_PYRUVATE_METABOLISM_AND_CITRIC_ACID_TCA_CYCLE	REACTOME_PYRUVATE_METABOLISM_AND_CITRIC_ACID_TCA_CYCLE	54	0.379672	1.19002	0.194676	0.500474	0.398872	3552	tags=37%, list=22%, signal=29%	ME3/PDK4/MPC2/PDHA1/SUCLG2/PDK2/PDP2/SUCLG1/D2HGDH/ACO2/FAHD1/DLD/RXRA/PDK3/HAGH/SDHD/PDP1/IDH3B/IDH2/MPC1
REACTOME_PROGRAMMED_CELL_DEATH	REACTOME_PROGRAMMED_CELL_DEATH	REACTOME_PROGRAMMED_CELL_DEATH	192	-0.273544	-1.10334	0.194915	0.500658	0.399018	3442	tags=31%, list=21%, signal=24%	PSMC5/PSMD13/UBB/ROCK1/CARD8/PSMB4/PSMB2/FADD/PSMB10/PSMD1/PSMD12/IL1A/TNFRSF10A/PSMA4/UBA52/DFFB/LMNA/UNC5A/PSMD14/PSMA3/PSMA1/FASLG/PPP3R1/PSMD8/PSMB3/PSMD9/PSMC4/AKT1/YWHAE/GZMB/PSMD2/PSMC1/PSMC3/TFDP1/CLSPN/PSMB8/SFN/AKT3/PSMB5/IL18/PSME1/PSMC6/HSP90AA1/CDKN2A/CASP4/IRF1/FAS/PSMB6/BIRC3/C1QBP/VIM/ARHGAP10/DAPK1/PSMB9/PMAIP1/CD14/LY96/IL1B/DSG3
REACTOME_CYTOSOLIC_SENSORS_OF_PATHOGEN_ASSOCIATED_DNA	REACTOME_CYTOSOLIC_SENSORS_OF_PATHOGEN_ASSOCIATED_DNA	REACTOME_CYTOSOLIC_SENSORS_OF_PATHOGEN_ASSOCIATED_DNA	60	-0.337981	-1.15296	0.195373	0.501401	0.39961	3669	tags=33%, list=23%, signal=26%	POLR3D/POLR3B/TRIM32/UBB/NFKBIA/CHUK/POLR3K/DHX9/UBA52/POLR1C/NKIRAS1/POLR2E/NLRC3/POLR3GL/NFKB2/POLR2L/IRF7/POLR3G/IFI16/AIM2
KEGG_MEDICUS_REFERENCE_CITRATE_CYCLE_SECOND_CARBON_OXIDATION_2	KEGG_MEDICUS_REFERENCE_CITRATE_CYCLE_SECOND_CARBON_OXIDATION_2	KEGG_MEDICUS_REFERENCE_CITRATE_CYCLE_SECOND_CARBON_OXIDATION_2	10	0.597304	1.27966	0.195896	0.502309	0.400334	3047	tags=30%, list=19%, signal=24%	SUCLG2/SUCLG1/SDHD
REACTOME_DISEASES_OF_GLYCOSYLATION	REACTOME_DISEASES_OF_GLYCOSYLATION	REACTOME_DISEASES_OF_GLYCOSYLATION	133	-0.289079	-1.11794	0.196185	0.502619	0.400581	2368	tags=26%, list=15%, signal=22%	NUS1/B3GALT6/PRELP/SBSPON/ADAMTS5/MUC17/THBS1/MGAT2/FMOD/MUC16/ADAMTSL4/ADAMTS1/NOTCH2/CSPG4/GPC1/MUC5B/SRD5A3/NOTCH3/MUC6/CHST6/CHSY1/CHST3/GPC6/SDC2/ADAMTS12/DCN/MUC1/MUC5AC/VCAN/LUM/ADAMTS2/BGN/SPON1/THBS2
REACTOME_SYNTHESIS_OF_GLYCOSYLPHOSPHATIDYLINOSITOL_GPI	REACTOME_SYNTHESIS_OF_GLYCOSYLPHOSPHATIDYLINOSITOL_GPI	REACTOME_SYNTHESIS_OF_GLYCOSYLPHOSPHATIDYLINOSITOL_GPI	17	0.506099	1.24543	0.196364	0.502644	0.400601	51	tags=6%, list=0%, signal=6%	PIGZ
REACTOME_SIGNALING_BY_HEDGEHOG	REACTOME_SIGNALING_BY_HEDGEHOG	REACTOME_SIGNALING_BY_HEDGEHOG	141	-0.288394	-1.11917	0.1983	0.507165	0.404204	3568	tags=38%, list=22%, signal=30%	PSMA5/NUMB/ADAM17/PSMC5/PSMD13/UBB/BOC/RBX1/CDC73/CDON/PSMB4/PSMB2/WDR19/PSMB10/PSMD1/PSMD12/PSMA4/UBA52/EVC2/PSMD14/SMURF2/PSMA3/PSMA1/P4HB/PSMD8/TUBB3/PSMB3/TUBA4A/PSMD9/DZIP1/PSMC4/GPR161/EVC/GLI3/PSMD2/KIF3A/PSMC1/TUBA1C/PSMC3/PSMB8/GLI2/PSMB5/TUBB2B/PSME1/TUBA1B/PSMC6/TUBA1A/PSMB6/TUBB2A/ADCY7/PSMB9/PRKAR2B/TUBB6/GAS1
REACTOME_NEGATIVE_REGULATION_OF_MAPK_PATHWAY	REACTOME_NEGATIVE_REGULATION_OF_MAPK_PATHWAY	REACTOME_NEGATIVE_REGULATION_OF_MAPK_PATHWAY	42	-0.378925	-1.20296	0.199074	0.508367	0.405162	3437	tags=38%, list=21%, signal=30%	UBB/PPP2R5E/MAP2K1/PAQR3/UBA52/MARK3/MAPK12/PPP2R5C/PTPN7/DUSP2/HRAS/DUSP7/DUSP6/DUSP10/DUSP5/DUSP4
BIOCARTA_TH1TH2_PATHWAY	BIOCARTA_TH1TH2_PATHWAY	BIOCARTA_TH1TH2_PATHWAY	19	-0.460558	-1.22292	0.199115	0.508367	0.405162	2719	tags=47%, list=17%, signal=39%	IL12RB1/CD28/IL12RB2/IL18/CD40/IL2RA/IFNG/CD86/HLA-DRA
REACTOME_MISCELLANEOUS_TRANSPORT_AND_BINDING_EVENTS	REACTOME_MISCELLANEOUS_TRANSPORT_AND_BINDING_EVENTS	REACTOME_MISCELLANEOUS_TRANSPORT_AND_BINDING_EVENTS	23	0.465649	1.22856	0.199288	0.508367	0.405162	1134	tags=22%, list=7%, signal=20%	ANKH/ADD3/DMTN/NIPAL2/AZGP1
REACTOME_KERATINIZATION	REACTOME_KERATINIZATION	REACTOME_KERATINIZATION	128	-0.289934	-1.11607	0.199454	0.508367	0.405162	442	tags=10%, list=3%, signal=10%	KRT19/KRT13/KRT14/KRT5/KLK8/KRT6B/KRT7/SPRR3/SPRR1A/KRT16/DSG3/SPRR1B/KRT6A
WP_MEVALONATE_ARM_OF_CHOLESTEROL_BIOSYNTHESIS_PATHWAY	WP_MEVALONATE_ARM_OF_CHOLESTEROL_BIOSYNTHESIS_PATHWAY	WP_MEVALONATE_ARM_OF_CHOLESTEROL_BIOSYNTHESIS_PATHWAY	13	0.557424	1.27905	0.199634	0.508391	0.405182	5159	tags=69%, list=32%, signal=47%	HMGCR/IDI1/FDFT1/MVD/MVK/HMGCL/ACAT1/ACAT2/HMGCS1
BIOCARTA_LEPTIN_PATHWAY	BIOCARTA_LEPTIN_PATHWAY	BIOCARTA_LEPTIN_PATHWAY	11	0.581111	1.28631	0.200368	0.509824	0.406324	3083	tags=27%, list=19%, signal=22%	PRKAB1/CPT1A/PRKAA1
PID_P38_ALPHA_BETA_DOWNSTREAM_PATHWAY	PID_P38_ALPHA_BETA_DOWNSTREAM_PATHWAY	PID_P38_ALPHA_BETA_DOWNSTREAM_PATHWAY	38	-0.382572	-1.17951	0.200924	0.510803	0.407103	2369	tags=29%, list=15%, signal=25%	MAPKAPK2/SLC9A1/NOS2/USF1/MAPK11/KRT19/HSPB1/EIF4EBP1/MITF/PLA2G4A/PTGS2
REACTOME_RRNA_MODIFICATION_IN_THE_NUCLEUS_AND_CYTOSOL	REACTOME_RRNA_MODIFICATION_IN_THE_NUCLEUS_AND_CYTOSOL	REACTOME_RRNA_MODIFICATION_IN_THE_NUCLEUS_AND_CYTOSOL	50	-0.35149	-1.16685	0.201456	0.51172	0.407834	5631	tags=50%, list=35%, signal=33%	UTP6/TSR3/NHP2/UTP3/NOC4L/RRP9/DCAF13/TBL3/WDR3/WDR75/HEATR1/PNO1/WDR43/FCF1/DIMT1/EMG1/FBL/NOP10/BMS1/UTP18/IMP4/UTP15/WDR36/RRP36/TRMT112
WP_KALLMANN_SYNDROME	WP_KALLMANN_SYNDROME	WP_KALLMANN_SYNDROME	22	-0.4641	-1.24968	0.201835	0.512244	0.408252	1853	tags=23%, list=11%, signal=20%	AKT1/FGFR1/PLXND1/MYRF/PROK2
PID_NOTCH_PATHWAY	PID_NOTCH_PATHWAY	PID_NOTCH_PATHWAY	57	-0.344018	-1.1635	0.202532	0.513575	0.409313	2252	tags=23%, list=14%, signal=20%	SKP2/CCND1/DNER/NOTCH2/MIB1/NOTCH3/GATA3/MFAP5/RBBP8/ENO1/MFAP2/DNM1/ADAM12
WP_IL_2_SIGNALING_PATHWAY	WP_IL_2_SIGNALING_PATHWAY	WP_IL_2_SIGNALING_PATHWAY	37	-0.389364	-1.19121	0.202797	0.51381	0.4095	2373	tags=30%, list=15%, signal=25%	RPS6KB1/JAK3/AKT1/NMI/HRAS/IL2RA/IL2RB/SOCS3/STAT1/FYN/LCK
WP_DNA_REPAIR_PATHWAYS_FULL_NETWORK	WP_DNA_REPAIR_PATHWAYS_FULL_NETWORK	WP_DNA_REPAIR_PATHWAYS_FULL_NETWORK	110	-0.29641	-1.1287	0.203166	0.514308	0.409897	4648	tags=49%, list=29%, signal=35%	POLH/GTF2H1/ERCC2/RPA3/POLE4/PNKP/ERCC4/XPA/LIG1/GTF2H5/XRCC4/WRN/FANCL/PCNA/POLB/GTF2H4/ERCC1/UNG/FANCE/MSH2/ERCC8/FANCB/CETN2/POLE3/POLD2/FANCI/RBX1/RFC1/FANCD2/APEX1/FANCG/POLD1/TDG/MSH6/USP1/NBN/CHEK1/FANCM/RFC5/RAD51/RFC4/NEIL3/RFC2/RAD51C/RPA1/DDB2/RPA2/PARP1/NEIL2/FEN1/EXO1/POLE2/PARP2/MNAT1
REACTOME_APOPTOTIC_CLEAVAGE_OF_CELLULAR_PROTEINS	REACTOME_APOPTOTIC_CLEAVAGE_OF_CELLULAR_PROTEINS	REACTOME_APOPTOTIC_CLEAVAGE_OF_CELLULAR_PROTEINS	36	0.420491	1.2101	0.203509	0.514737	0.410239	3375	tags=42%, list=21%, signal=33%	SATB1/CDH1/CASP6/GAS2/CASP7/DSP/PRKCD/TJP2/STK24/OCLN/DSG2/PRKCQ/SPTAN1/CASP8/BMX
REACTOME_CILIUM_ASSEMBLY	REACTOME_CILIUM_ASSEMBLY	REACTOME_CILIUM_ASSEMBLY	181	-0.276254	-1.10767	0.203966	0.515113	0.410538	4021	tags=36%, list=25%, signal=27%	BBS9/DYNC2H1/TUBB4B/CKAP5/MCHR1/LZTFL1/HAUS3/NPHP4/EXOC2/PAFAH1B1/DYNLL1/CETN2/ODF2/HAUS6/IFT20/IFT81/ACTR1A/ARL3/TMEM67/WDR19/BBS4/SDCCAG8/CDK1/CCT8/HAUS8/PDE6D/CLUAP1/CEP78/CEP192/TTC26/NEDD1/CEP97/PLK4/IFT22/CCT2/TUBB3/CYS1/CEP135/TUBA4A/IFT43/YWHAE/BBS12/BBS7/KIF3A/TUBA1C/ARL6/EXOC5/ARF4/TUBB/TTC8/PLK1/TUBB2B/NEK2/TUBA1B/B9D1/TUBG1/HSP90AA1/HAUS1/TUBA1A/ARL13B/PKD2/CEP76/TUBB2A/PRKAR2B/TUBB6
WP_NUCLEOTIDE_EXCISION_REPAIR_IN_XERODERMA_PIGMENTOSUM	WP_NUCLEOTIDE_EXCISION_REPAIR_IN_XERODERMA_PIGMENTOSUM	WP_NUCLEOTIDE_EXCISION_REPAIR_IN_XERODERMA_PIGMENTOSUM	56	-0.341887	-1.15134	0.204082	0.515113	0.410538	4928	tags=54%, list=30%, signal=37%	POLH/GTF2H1/ERCC2/RPA3/GPS1/POLE4/ERCC4/XPA/LIG1/GTF2H5/PCNA/GTF2H4/ERCC1/ERCC8/CETN2/POLE3/POLD2/RBX1/RFC1/HMGN1/POLD1/RFC5/RFC4/RFC2/RPA1/DDB2/RPA2/PARP1/POLE2/MNAT1
REACTOME_SPHINGOLIPID_DE_NOVO_BIOSYNTHESIS	REACTOME_SPHINGOLIPID_DE_NOVO_BIOSYNTHESIS	REACTOME_SPHINGOLIPID_DE_NOVO_BIOSYNTHESIS	31	-0.413197	-1.20882	0.204176	0.515113	0.410538	1317	tags=32%, list=8%, signal=30%	VAPA/SAMD8/SPTSSB/SPTLC2/PRKD1/KDSR/SGMS2/DEGS1/SGMS1/SPHK1
REACTOME_CITRIC_ACID_CYCLE_TCA_CYCLE	REACTOME_CITRIC_ACID_CYCLE_TCA_CYCLE	REACTOME_CITRIC_ACID_CYCLE_TCA_CYCLE	22	0.46646	1.22331	0.204947	0.516619	0.411739	5617	tags=64%, list=35%, signal=42%	ME3/SUCLG2/SUCLG1/ACO2/FAHD1/DLD/SDHD/IDH3B/IDH2/NNT/IDH3G/OGDH/IDH3A/CS
REACTOME_DEFECTIVE_C1GALT1C1_CAUSES_TNPS	REACTOME_DEFECTIVE_C1GALT1C1_CAUSES_TNPS	REACTOME_DEFECTIVE_C1GALT1C1_CAUSES_TNPS	15	0.529979	1.25596	0.205128	0.516638	0.411754	349	tags=20%, list=2%, signal=20%	MUC12/MUC20/MUC13
BIOCARTA_AT1R_PATHWAY	BIOCARTA_AT1R_PATHWAY	BIOCARTA_AT1R_PATHWAY	25	0.453072	1.22125	0.205527	0.517205	0.412206	2556	tags=32%, list=16%, signal=27%	AGT/JUN/EGFR/PTK2B/PAK1/PRKCA/MAPK3/SOS1
PID_ERBB1_DOWNSTREAM_PATHWAY	PID_ERBB1_DOWNSTREAM_PATHWAY	PID_ERBB1_DOWNSTREAM_PATHWAY	103	0.33058	1.16264	0.205788	0.517424	0.412381	2737	tags=24%, list=17%, signal=20%	CHN2/JUN/RPS6KA3/CYFIP2/PIK3R1/YWHAB/GAB1/EGFR/KSR1/PDPK1/SRC/PRKCD/MAP2K5/VAV2/PRKCZ/WASL/EPS8/PRKCA/MAP3K2/PIK3CB/PLD1/MAPK3/F2RL2/SOS1/IQGAP1
REACTOME_SIGNALING_BY_TGF_BETA_RECEPTOR_COMPLEX	REACTOME_SIGNALING_BY_TGF_BETA_RECEPTOR_COMPLEX	REACTOME_SIGNALING_BY_TGF_BETA_RECEPTOR_COMPLEX	91	-0.305019	-1.12197	0.207084	0.519781	0.414259	2596	tags=24%, list=16%, signal=20%	SMURF2/ITGB1/SMAD2/UCHL5/TGFB2/SNW1/LTBP2/LTBP3/PARP1/TFDP1/TGFBR1/ITGAV/NEDD8/UBE2M/TGFB3/WWTR1/BAMBI/TGFB1/FBN1/STAT1/COL1A2/SERPINE1
REACTOME_KETONE_BODY_METABOLISM	REACTOME_KETONE_BODY_METABOLISM	REACTOME_KETONE_BODY_METABOLISM	10	0.592477	1.26931	0.20709	0.519781	0.414259	1628	tags=30%, list=10%, signal=27%	HMGCS2/BDH1/BDH2
KEGG_LYSINE_DEGRADATION	KEGG_LYSINE_DEGRADATION	KEGG_LYSINE_DEGRADATION	39	0.412581	1.20969	0.207381	0.519781	0.414259	4728	tags=54%, list=29%, signal=38%	PIPOX/ALDH1B1/ALDH2/HADH/OGDHL/SETMAR/EHHADH/SETDB2/ASH1L/TMLHE/HADHA/SETD1A/EHMT2/ACAT1/PLOD3/ALDH7A1/SETD1B/PLOD2/ACAT2/GCDH/SETD2
REACTOME_CONDENSATION_OF_PROMETAPHASE_CHROMOSOMES	REACTOME_CONDENSATION_OF_PROMETAPHASE_CHROMOSOMES	REACTOME_CONDENSATION_OF_PROMETAPHASE_CHROMOSOMES	11	-0.536868	-1.24056	0.207424	0.519781	0.414259	3977	tags=55%, list=25%, signal=41%	SMC4/SMC2/CDK1/NCAPH/NCAPG/CCNB1
WP_PROGERIA_ASSOCIATED_LIPODYSTROPHY	WP_PROGERIA_ASSOCIATED_LIPODYSTROPHY	WP_PROGERIA_ASSOCIATED_LIPODYSTROPHY	20	-0.462557	-1.22202	0.208145	0.520784	0.415058	2990	tags=50%, list=19%, signal=41%	POLD1/LMNA/BANF1/SMAD2/LMNB2/ICMT/PARP1/RECQL/TGFB1/FBN1
KEGG_MEDICUS_REFERENCE_EGF_EGFR_PLCG_CAMK_SIGNALING_PATHWAY	KEGG_MEDICUS_REFERENCE_EGF_EGFR_PLCG_CAMK_SIGNALING_PATHWAY	KEGG_MEDICUS_REFERENCE_EGF_EGFR_PLCG_CAMK_SIGNALING_PATHWAY	13	0.555394	1.27439	0.208791	0.520784	0.415058	1357	tags=23%, list=8%, signal=21%	CAMK1D/PLCG1/EGFR
KEGG_MEDICUS_REFERENCE_WNT_SIGNALING_MODULATION_SOST_LRP4	KEGG_MEDICUS_REFERENCE_WNT_SIGNALING_MODULATION_SOST_LRP4	KEGG_MEDICUS_REFERENCE_WNT_SIGNALING_MODULATION_SOST_LRP4	13	0.555695	1.27508	0.208791	0.520784	0.415058	2232	tags=38%, list=14%, signal=33%	LRP4/FZD5/LRP6/FZD9/FZD10
PID_AURORA_A_PATHWAY	PID_AURORA_A_PATHWAY	PID_AURORA_A_PATHWAY	31	-0.40859	-1.19534	0.208817	0.520784	0.415058	3255	tags=39%, list=20%, signal=31%	OAZ1/NFKBIA/NDEL1/MDM2/CENPA/AKT1/TACC3/AURKB/RAN/BIRC5/AJUBA/DLGAP5
KEGG_MEDICUS_REFERENCE_TBK1_MEDIATED_AUTOPHAGOSOME_FORMATION	KEGG_MEDICUS_REFERENCE_TBK1_MEDIATED_AUTOPHAGOSOME_FORMATION	KEGG_MEDICUS_REFERENCE_TBK1_MEDIATED_AUTOPHAGOSOME_FORMATION	10	0.590893	1.26592	0.208955	0.520784	0.415058	3404	tags=40%, list=21%, signal=32%	MAP1LC3A/NBR1/CALCOCO2/SQSTM1
REACTOME_ACTIVATION_OF_PPARGC1A_PGC_1ALPHA_BY_PHOSPHORYLATION	REACTOME_ACTIVATION_OF_PPARGC1A_PGC_1ALPHA_BY_PHOSPHORYLATION	REACTOME_ACTIVATION_OF_PPARGC1A_PGC_1ALPHA_BY_PHOSPHORYLATION	10	0.591138	1.26645	0.208955	0.520784	0.415058	516	tags=20%, list=3%, signal=19%	PPARGC1A/PRKAB1
REACTOME_CLATHRIN_MEDIATED_ENDOCYTOSIS	REACTOME_CLATHRIN_MEDIATED_ENDOCYTOSIS	REACTOME_CLATHRIN_MEDIATED_ENDOCYTOSIS	139	0.307118	1.12879	0.209048	0.520784	0.415058	2278	tags=19%, list=14%, signal=16%	CFTR/EREG/SLC2A8/REPS2/AREG/TGOLN2/DAB2/OCRL/FNBP1L/BIN1/EGFR/IGF2R/EPN1/SH3KBP1/HIP1R/FNBP1/SYT1/GAK/STON2/WASL/ARFGAP1/HBEGF/SYNJ2/ITSN2/RAB5B/DNAJC6
WP_EPITHELIAL_TO_MESENCHYMAL_TRANSITION_IN_COLORECTAL_CANCER	WP_EPITHELIAL_TO_MESENCHYMAL_TRANSITION_IN_COLORECTAL_CANCER	WP_EPITHELIAL_TO_MESENCHYMAL_TRANSITION_IN_COLORECTAL_CANCER	150	-0.282113	-1.11154	0.209809	0.522243	0.416221	2180	tags=25%, list=13%, signal=22%	WNT10A/MAP2K4/FZD1/TGFB2/MAPK11/CDH2/EED/AKT1/PIK3CD/SNAI1/TGFBR1/NOTCH2/LATS2/TUSC3/FOXM1/COL4A2/AKT3/WNT5A/NOTCH3/HRAS/WNT2/TWIST2/ZEB2/COL4A1/EIF5A2/MMP2/FZD2/FN1/TGFB3/HIF1A/NRP2/TGFB1/SNAI2/ITGA5/SPARC/MMP9/TWIST1/CLDN18
REACTOME_SIGNAL_AMPLIFICATION	REACTOME_SIGNAL_AMPLIFICATION	REACTOME_SIGNAL_AMPLIFICATION	33	-0.401247	-1.1964	0.210046	0.522394	0.416342	2784	tags=33%, list=17%, signal=28%	GNB1/GNAI1/GNG2/GNG10/GNAI3/GNB5/GNG11/GNAI2/GNB4/GNA15/PLA2G4A
REACTOME_IKK_COMPLEX_RECRUITMENT_MEDIATED_BY_RIP1	REACTOME_IKK_COMPLEX_RECRUITMENT_MEDIATED_BY_RIP1	REACTOME_IKK_COMPLEX_RECRUITMENT_MEDIATED_BY_RIP1	21	-0.455154	-1.21299	0.210526	0.523153	0.416946	697	tags=29%, list=4%, signal=27%	UBB/CHUK/UBA52/BIRC3/CD14/LY96
REACTOME_SUMOYLATION_OF_RNA_BINDING_PROTEINS	REACTOME_SUMOYLATION_OF_RNA_BINDING_PROTEINS	REACTOME_SUMOYLATION_OF_RNA_BINDING_PROTEINS	43	-0.37221	-1.18665	0.210773	0.523328	0.417086	4626	tags=51%, list=29%, signal=37%	NUP98/NUP54/PCGF2/PHC2/NUP93/NUP37/NUP43/CBX4/PHC1/CBX2/NUP133/NUP205/NUP62/NUP160/NUP50/NUP35/HNRNPC/NUP155/SEC13/NUP210/NDC1/SEH1L
WP_ANGIOGENESIS	WP_ANGIOGENESIS	WP_ANGIOGENESIS	24	-0.437362	-1.2133	0.211982	0.525662	0.418946	3030	tags=42%, list=19%, signal=34%	TEK/ANGPT1/KDR/PDGFB/AKT1/FGF2/TIMP3/HIF1A/TIMP2/MMP9
REACTOME_DEFECTIVE_GALNT3_CAUSES_HFTC	REACTOME_DEFECTIVE_GALNT3_CAUSES_HFTC	REACTOME_DEFECTIVE_GALNT3_CAUSES_HFTC	14	0.537171	1.25511	0.212066	0.525662	0.418946	349	tags=21%, list=2%, signal=21%	MUC12/MUC20/MUC13
REACTOME_TRAF6_MEDIATED_INDUCTION_OF_TAK1_COMPLEX_WITHIN_TLR4_COMPLEX	REACTOME_TRAF6_MEDIATED_INDUCTION_OF_TAK1_COMPLEX_WITHIN_TLR4_COMPLEX	REACTOME_TRAF6_MEDIATED_INDUCTION_OF_TAK1_COMPLEX_WITHIN_TLR4_COMPLEX	15	-0.491848	-1.22943	0.212719	0.526843	0.419887	169	tags=27%, list=1%, signal=26%	UBB/UBA52/CD14/LY96
REACTOME_BIOSYNTHESIS_OF_SPECIALIZED_PRORESOLVING_MEDIATORS_SPMS	REACTOME_BIOSYNTHESIS_OF_SPECIALIZED_PRORESOLVING_MEDIATORS_SPMS	REACTOME_BIOSYNTHESIS_OF_SPECIALIZED_PRORESOLVING_MEDIATORS_SPMS	18	-0.460803	-1.19795	0.213152	0.527411	0.42034	1025	tags=22%, list=6%, signal=21%	HPGD/ALOX5/ALOX5AP/PTGS2
KEGG_MEDICUS_REFERENCE_TYPE_I_INTERFERON_TO_JAK_STAT_SIGNALING_PATHWAY	KEGG_MEDICUS_REFERENCE_TYPE_I_INTERFERON_TO_JAK_STAT_SIGNALING_PATHWAY	KEGG_MEDICUS_REFERENCE_TYPE_I_INTERFERON_TO_JAK_STAT_SIGNALING_PATHWAY	22	-0.457656	-1.23233	0.213303	0.527411	0.42034	3455	tags=23%, list=21%, signal=18%	IFNAR2/IFNE/IRF9/STAT2/STAT1
WP_BMP_SIGNALING_IN_EYELID_DEVELOPMENT	WP_BMP_SIGNALING_IN_EYELID_DEVELOPMENT	WP_BMP_SIGNALING_IN_EYELID_DEVELOPMENT	20	0.472642	1.20663	0.214286	0.527843	0.420684	1518	tags=30%, list=9%, signal=27%	JUN/SHH/NOTCH1/PITX2/EGFR/INHBB
REACTOME_BETA_CATENIN_PHOSPHORYLATION_CASCADE	REACTOME_BETA_CATENIN_PHOSPHORYLATION_CASCADE	REACTOME_BETA_CATENIN_PHOSPHORYLATION_CASCADE	17	0.498604	1.22699	0.214545	0.527843	0.420684	4240	tags=47%, list=26%, signal=35%	AXIN1/FRAT2/AMER1/FRAT1/PPP2R5A/GSK3B/PPP2R5B/CTNNB1
REACTOME_SCAVENGING_OF_HEME_FROM_PLASMA	REACTOME_SCAVENGING_OF_HEME_FROM_PLASMA	REACTOME_SCAVENGING_OF_HEME_FROM_PLASMA	10	-0.547333	-1.23419	0.214592	0.527843	0.420684	315	tags=20%, list=2%, signal=20%	APOL1/CD163
WP_GENETIC_CAUSES_OF_PORTO_SINUSOIDAL_VASCULAR_DISEASE	WP_GENETIC_CAUSES_OF_PORTO_SINUSOIDAL_VASCULAR_DISEASE	WP_GENETIC_CAUSES_OF_PORTO_SINUSOIDAL_VASCULAR_DISEASE	33	-0.399681	-1.19173	0.214612	0.527843	0.420684	2648	tags=27%, list=16%, signal=23%	BEND6/EOGT/BTK/ARHGAP31/SHCBP1/NCF1/TLR8/CYBB/NCF2
REACTOME_PROCESSIVE_SYNTHESIS_ON_THE_LAGGING_STRAND	REACTOME_PROCESSIVE_SYNTHESIS_ON_THE_LAGGING_STRAND	REACTOME_PROCESSIVE_SYNTHESIS_ON_THE_LAGGING_STRAND	15	-0.490601	-1.22631	0.214912	0.527843	0.420684	5077	tags=73%, list=31%, signal=50%	POLA2/RPA3/LIG1/PCNA/POLD2/POLD1/PRIM1/PRIM2/RPA1/RPA2/FEN1
REACTOME_INHIBITION_OF_DNA_RECOMBINATION_AT_TELOMERE	REACTOME_INHIBITION_OF_DNA_RECOMBINATION_AT_TELOMERE	REACTOME_INHIBITION_OF_DNA_RECOMBINATION_AT_TELOMERE	20	-0.457187	-1.20783	0.214932	0.527843	0.420684	2727	tags=35%, list=17%, signal=29%	TINF2/POLR2E/POLR2A/POLR2I/POLR2G/ACD/POLR2L
REACTOME_RHOBTB2_GTPASE_CYCLE	REACTOME_RHOBTB2_GTPASE_CYCLE	REACTOME_RHOBTB2_GTPASE_CYCLE	20	-0.455372	-1.20304	0.214932	0.527843	0.420684	3298	tags=45%, list=20%, signal=36%	HSP90AB1/CCT7/TXNL1/TRA2B/HNRNPC/ACTN1/CCT2/HSP90AA1/DBN1
PID_RAC1_PATHWAY	PID_RAC1_PATHWAY	PID_RAC1_PATHWAY	53	0.375512	1.17278	0.215	0.527843	0.420684	541	tags=13%, list=3%, signal=13%	NOX1/JUN/MAP2K6/CDH1/CYFIP2/PIP5K1B/NOXA1
WP_EDA_SIGNALING_IN_HAIR_FOLLICLE_DEVELOPMENT	WP_EDA_SIGNALING_IN_HAIR_FOLLICLE_DEVELOPMENT	WP_EDA_SIGNALING_IN_HAIR_FOLLICLE_DEVELOPMENT	12	0.563352	1.2715	0.215074	0.527843	0.420684	964	tags=33%, list=6%, signal=31%	SHH/SOSTDC1/PTCH1/EDA
WP_FOXA2_PATHWAY	WP_FOXA2_PATHWAY	WP_FOXA2_PATHWAY	20	0.472144	1.20536	0.216071	0.529856	0.422288	2116	tags=30%, list=13%, signal=26%	MLXIPL/FOXA2/ABCC3/PPARGC1B/ABCC2/GSTA1
REACTOME_APOPTOSIS	REACTOME_APOPTOSIS	REACTOME_APOPTOSIS	163	-0.280142	-1.10827	0.216763	0.530381	0.422707	3442	tags=36%, list=21%, signal=29%	TJP1/TP73/KPNA1/BCL2L11/DYNLL1/PSMA5/TNFRSF10B/PSMC5/PSMD13/UBB/ROCK1/CARD8/PSMB4/PSMB2/FADD/PSMB10/PSMD1/PSMD12/TNFRSF10A/PSMA4/UBA52/DFFB/LMNA/UNC5A/PSMD14/PSMA3/PSMA1/FASLG/PPP3R1/PSMD8/PSMB3/PSMD9/PSMC4/AKT1/YWHAE/GZMB/PSMD2/PSMC1/PSMC3/TFDP1/CLSPN/PSMB8/SFN/AKT3/PSMB5/PSME1/PSMC6/CDKN2A/FAS/PSMB6/C1QBP/VIM/ARHGAP10/DAPK1/PSMB9/PMAIP1/CD14/LY96/DSG3
REACTOME_ANCHORING_OF_THE_BASAL_BODY_TO_THE_PLASMA_MEMBRANE	REACTOME_ANCHORING_OF_THE_BASAL_BODY_TO_THE_PLASMA_MEMBRANE	REACTOME_ANCHORING_OF_THE_BASAL_BODY_TO_THE_PLASMA_MEMBRANE	93	-0.299943	-1.11139	0.216931	0.530381	0.422707	3728	tags=32%, list=23%, signal=25%	HAUS3/NPHP4/PAFAH1B1/DYNLL1/CETN2/ODF2/HAUS6/ACTR1A/TMEM67/SDCCAG8/CDK1/HAUS8/CEP78/CEP192/NEDD1/CEP97/PLK4/CEP135/TUBA4A/YWHAE/TUBB/PLK1/NEK2/B9D1/TUBG1/HSP90AA1/HAUS1/TUBA1A/CEP76/PRKAR2B
REACTOME_TRNA_PROCESSING_IN_THE_NUCLEUS	REACTOME_TRNA_PROCESSING_IN_THE_NUCLEUS	REACTOME_TRNA_PROCESSING_IN_THE_NUCLEUS	54	-0.34231	-1.14574	0.216958	0.530381	0.422707	4626	tags=46%, list=29%, signal=33%	NUP98/NUP54/TSEN34/POP1/NUP93/NUP37/NUP43/FAM98B/POP5/NUP133/NUP205/CSTF2/NUP62/NUP160/NUP50/NUP35/ELAC2/NUP155/POP7/TSEN15/SEC13/NUP210/RAN/NDC1/SEH1L
REACTOME_GRB2_EVENTS_IN_ERBB2_SIGNALING	REACTOME_GRB2_EVENTS_IN_ERBB2_SIGNALING	REACTOME_GRB2_EVENTS_IN_ERBB2_SIGNALING	16	0.504759	1.22869	0.216998	0.530381	0.422707	2647	tags=31%, list=16%, signal=26%	EREG/EGFR/HBEGF/SOS1/ERBB2
KEGG_ETHER_LIPID_METABOLISM	KEGG_ETHER_LIPID_METABOLISM	KEGG_ETHER_LIPID_METABOLISM	25	-0.433772	-1.2004	0.217494	0.530937	0.42315	386	tags=16%, list=2%, signal=16%	PLA2G7/LPCAT1/PLA2G4A/PLA2G2A
BIOCARTA_HSP27_PATHWAY	BIOCARTA_HSP27_PATHWAY	BIOCARTA_HSP27_PATHWAY	14	-0.514161	-1.25919	0.217582	0.530937	0.42315	3768	tags=57%, list=23%, signal=44%	ACTA1/MAPKAPK2/IL1A/HSPB2/FASLG/TNF/HSPB1/FAS
BIOCARTA_CCR3_PATHWAY	BIOCARTA_CCR3_PATHWAY	BIOCARTA_CCR3_PATHWAY	19	0.48157	1.20924	0.218182	0.53148	0.423583	2519	tags=26%, list=16%, signal=22%	NOX1/ROCK2/PLCB1/PRKCA/MAPK3
REACTOME_ACYL_CHAIN_REMODELLING_OF_PC	REACTOME_ACYL_CHAIN_REMODELLING_OF_PC	REACTOME_ACYL_CHAIN_REMODELLING_OF_PC	23	-0.442268	-1.22042	0.218182	0.53148	0.423583	216	tags=39%, list=1%, signal=39%	PLA2G2D/PLA2G5/TMEM86B/PLA2G2F/PLA2G3/MBOAT2/LPCAT1/PLA2G4A/PLA2G2A
REACTOME_SARS_COV_2_TARGETS_HOST_INTRACELLULAR_SIGNALLING_AND_REGULATORY_PATHWAYS	REACTOME_SARS_COV_2_TARGETS_HOST_INTRACELLULAR_SIGNALLING_AND_REGULATORY_PATHWAYS	REACTOME_SARS_COV_2_TARGETS_HOST_INTRACELLULAR_SIGNALLING_AND_REGULATORY_PATHWAYS	12	-0.51096	-1.20007	0.218341	0.53148	0.423583	1853	tags=42%, list=11%, signal=37%	AKT1/YWHAE/SFN/AKT3/CAV1
WP_8P23_1_COPY_NUMBER_VARIATION_SYNDROME	WP_8P23_1_COPY_NUMBER_VARIATION_SYNDROME	WP_8P23_1_COPY_NUMBER_VARIATION_SYNDROME	47	-0.353624	-1.14615	0.21875	0.531957	0.423963	2391	tags=23%, list=15%, signal=20%	SOX7/CSTA/CTSD/SLBP/NEIL2/FAM167A/ERI1/CTSB/TLR2/FCGR2B/FCGR2A
[truncated: 1,753 more rows]
